# Supplementary material
Source: publisher figshare collection journal article supplement (https://gsajournals.figshare.com/ndownloader/files/25186142)
Supplement: Supplementary file 1 [file 25186142]

## Sheet: Table S1
Table S1: Primers used for RT-qPCR.
Gene Name	Forward Primer	Reverse Primer
svp	5'-CTGCTTCTCAGACTGCCATC-3'	5'-ATAGGGCCAGGAGAAACTGT-3'
Rp49	5’-CAGTCGGATCGATATGCTAAGC-3’	5’-AATCTCCTTGCGCTTCTTGG-3’

## Sheet: Table S2
Table S2: List of total fat body transcripts and relative abundance in control and svp adult female RNAi fat bodies.
Gene_ID	svpi_1	svpi_2	svpi_3	Ctrl_1	Ctrl_2	Ctrl_3	log2FoldChange	pvalue	padj	GeneName	gene_chr	gene_strand	gene_start	gene_end	gene_length	gene_biotype	gene_description	svpi_1_readcount	svpi_2_readcount	svpi_3_readcount	Ctrl_1_readcount	Ctrl_2_readcount	Ctrl_3_readcount	svpi_1_fpkm	svpi_2_fpkm	svpi_3_fpkm	Ctrl_1_fpkm	Ctrl_2_fpkm	Ctrl_3_fpkm
FBgn0000003	1.54947	2.51041	0.981919	0.771154	4.6127	1.15015	-0.068427	0.82378	0.99972	7SLRNA:CR32864	3R	+	6822498	6822796	299	lincRNA	NA	2	2	1	1	4	1	0.343436	0.427439	0.200004	0.197328	0.759732	0.186419
FBgn0000008	420.681	664.004	447.755	371.696	439.36	327.794	0.36816	0.17121	0.99972	a	2R	+	22136968	22172834	5414	protein_coding	NA	543	529	456	482	381	285	6.00078	7.27598	5.86941	6.12109	4.65712	3.41922
FBgn0000014	325.389	440.577	327.961	292.267	792.231	432.458	-0.36456	0.26501	0.99972	abd-A	3R	-	16807214	16830049	5477	protein_coding	NA	420	351	334	379	687	376	4.73421	4.92418	4.38497	4.90921	8.56525	4.60109
FBgn0000015	75.1493	50.2082	79.5355	52.4385	266.383	82.8111	-0.59349	0.11848	0.99972	Abd-B	3R	-	16927210	16972236	7719	protein_coding	NA	97	40	81	68	231	72	1.47609	0.757582	1.43565	1.18912	3.88811	1.18946
FBgn0000017	1435.58	1265.25	1422.8	2032.76	1252.35	1071.94	-0.068025	0.80703	0.99972	Abl	3L	-	16615866	16647882	12819	protein_coding	NA	1853	1008	1449	2636	1086	932	13.0382	8.82736	11.875	21.3138	8.45196	7.11923
FBgn0000018	115.435	109.203	101.138	108.733	145.3	161.021	-0.29507	0.28239	0.99972	abo	2L	-	10973443	10975293	1794	protein_coding	NA	149	87	103	141	126	140	4.26433	3.09893	3.4334	4.63722	3.9886	4.34978
FBgn0000024	20.9178	38.9114	44.1864	34.7019	48.4334	24.1532	-0.035451	0.92233	0.99972	Ace	3R	-	13222951	13259517	8473	protein_coding	NA	27	31	45	45	42	21	0.2715	0.387968	0.527037	0.519987	0.467133	0.229245
FBgn0000028	5.42314	7.53123	2.94576	0.771154	4.6127	1.15015	0.35248	0.31483	0.99972	acj6	X	-	15350239	15379064	4433	protein_coding	NA	7	6	3	1	4	1	0.127223	0.135721	0.0635056	0.0208854	0.0804106	0.0197307
FBgn0000032	728.251	581.16	662.795	977.824	583.507	668.239	-0.15371	0.56404	0.99972	Acph-1	3R	-	29991144	29993411	2024	protein_coding	NA	940	463	675	1268	506	581	25.1763	15.4338	21.0567	39.0263	14.99	16.8933
FBgn0000037	16.2694	51.4634	18.6565	18.5077	49.5865	34.5046	-0.14866	0.69981	0.99972	mAChR-A	2R	-	24378630	24390294	5425	protein_coding	NA	21	41	19	24	43	30	0.199744	0.485362	0.210489	0.262325	0.452384	0.309778
FBgn0000038	5.42314	10.0416	8.83727	12.3385	3.45953	2.30031	0.14223	0.70805	0.99972	nAChRbeta1	3L	+	4429349	4435993	2974	protein_coding	NA	7	8	9	16	3	2	0.219284	0.311908	0.328377	0.575972	0.103948	0.0680163
FBgn0000042	21736	32250	22659.7	27120.7	35949.1	30395.1	-0.25298	0.3126	0.99972	Act5C	X	+	5900861	5905399	2978	protein_coding	NA	28056	25693	23077	35169	31174	26427	635.42	724.233	608.747	915.312	780.931	649.768
FBgn0000043	2589.16	3626.29	2374.28	3157.88	4784.52	3136.47	-0.31475	0.24992	0.99972	Act42A	2R	-	6013910	6015689	1626	protein_coding	NA	3342	2889	2418	4095	4149	2727	105.529	113.538	88.9293	148.592	144.909	93.4816
FBgn0000044	1562.64	2319.62	1711.49	843.643	4995.55	2289.96	-0.35476	0.33865	0.99972	Act57B	2R	+	20944021	20946431	1724	protein_coding	NA	2017	1848	1743	1094	4332	1991	60.0697	68.4983	60.4601	37.4404	142.7	64.3718
FBgn0000045	64.303	81.5883	72.662	39.3289	70.3437	85.1114	0.13204	0.68841	0.99972	Act79B	3L	+	21985210	21987190	1619	protein_coding	NA	83	65	74	51	61	74	2.69546	2.62722	2.79904	1.90326	2.19114	2.60892
FBgn0000046	315.317	429.28	305.377	125.698	851.043	447.41	-0.27922	0.45779	0.99972	Act87E	3R	+	13425983	13428375	1989	protein_coding	NA	407	342	311	163	738	389	12.3797	12.947	11.0179	5.69739	24.8288	12.8451
FBgn0000047	0.774735	12.5521	3.92768	5.39808	4.6127	8.05107	-0.03359	0.92627	0.99972	Act88F	3R	+	15439969	15442177	1595	protein_coding	NA	1	10	4	7	4	7	0.0321904	0.40064	0.149971	0.258939	0.14242	0.244624
FBgn0000052	4990.07	8384.77	5819.83	3354.52	4879.08	7336.83	0.24348	0.43049	0.99972	ade2	2L	-	6041181	6046050	4434	protein_coding	NA	6441	6680	5927	4350	4231	6379	76.9438	99.3173	82.4665	59.715	55.9047	82.7271
FBgn0000053	6139	13305.2	9063.11	4970.09	9431.82	12635.6	0.058013	0.86212	0.99972	ade3	2L	-	7014623	7023898	4780	protein_coding	NA	7924	10600	9230	6445	8179	10986	113.486	188.943	153.965	106.07	129.564	170.81
FBgn0000054	626.761	489.53	539.074	810.483	403.611	524.47	-0.059814	0.83661	0.99972	Adf1	2R	+	6662265	6668085	1800	protein_coding	NA	809	390	549	1051	350	456	24.4048	14.6427	19.2895	36.4337	11.6783	14.9337
FBgn0000055	189.035	371.541	258.245	219.779	453.198	557.824	-0.44469	0.18534	0.99972	Adh	2L	+	14615552	14618902	2254	protein_coding	NA	244	296	263	285	393	485	8.47049	12.7891	10.634	11.3694	15.0902	18.2783
FBgn0000057	698.811	899.982	813.029	724.885	699.977	975.33	0.0059689	0.98053	0.99972	adp	2R	+	18151704	18154060	2291	protein_coding	NA	902	717	828	940	607	848	20.4378	20.2197	21.8514	24.4753	15.2125	20.8592
FBgn0000061	3.09894	1.25521	3.92768	5.39808	4.6127	6.90092	-0.33474	0.36568	0.99972	al	2L	+	378112	387439	1806	protein_coding	NA	4	1	4	7	4	6	0.113718	0.0353832	0.13245	0.228687	0.125781	0.18518
FBgn0000063	237.069	130.541	254.317	430.304	99.1731	193.226	-0.14531	0.69342	0.99972	ald	3R	+	17671271	17673828	2141	protein_coding	NA	306	104	259	558	86	168	7.38654	3.1245	7.28184	15.4784	2.29616	4.40254
FBgn0000064	17492	28642.5	18170.4	11234.2	23423.3	25834.7	0.069797	0.82605	0.99972	Ald	3R	-	26254069	26261591	3809	protein_coding	NA	22578	22819	18505	14568	20312	22462	670.079	842.879	639.664	496.838	666.774	723.709
FBgn0000071	1.54947	3.76562	0.981919	2.31346	20.7572	12.6517	-0.74428	0.042308	0.82172	Ama	3R	+	6762593	6765261	1946	protein_coding	NA	2	3	1	3	18	11	0.0628441	0.117323	0.036598	0.108325	0.625594	0.375234
FBgn0000075	37.962	10.0416	24.548	40.1	9.2254	24.1532	-0.008778	0.98206	0.99972	amd	2L	+	19110154	19114110	2224	protein_coding	NA	49	8	25	52	8	21	1.42058	0.28866	0.844171	1.73239	0.256533	0.660941
FBgn0000077	202.206	239.744	247.444	265.277	193.733	209.328	0.035935	0.88745	0.99972	amx	X	-	9245915	9247336	1422	protein_coding	NA	261	191	252	344	168	182	10.1752	9.2675	11.4426	15.4111	7.24428	7.70278
FBgn0000078	4980.77	6235.86	5024.48	5425.07	2624.63	3253.78	0.43575	0.13421	0.99972	Amy-d	2R	+	17124764	17126369	1606	protein_coding	NA	6429	4968	5117	7035	2276	2829	205.535	197.675	190.537	258.452	80.482	98.1859
FBgn0000079	7930.19	10724.5	7883.83	6393.64	4654.21	5894.54	0.5762	0.018397	0.52451	Amy-p	2R	-	17118636	17120303	1668	protein_coding	NA	10236	8544	8029	8291	4036	5125	322.03	334.546	294.205	299.742	140.444	175.039
FBgn0000083	3675.34	6786.9	3900.18	3241.93	8684.56	6591.53	-0.27863	0.40396	0.99972	AnxB9	3R	+	21065241	21070917	2073	protein_coding	NA	4744	5407	3972	4204	7531	5731	180.827	256.51	176.34	184.143	317.51	237.151
FBgn0000084	631.409	1218.8	894.528	588.391	1054	1185.81	-0.034528	0.91245	0.99972	AnxB10	X	-	20171445	20173514	1247	protein_coding	NA	815	971	911	763	914	1031	33.5835	49.7985	43.7229	36.1299	41.6582	46.1214
FBgn0000092	5.42314	27.6145	26.5118	17.7365	63.4246	34.5046	-0.4951	0.20502	0.99972	CG2650	X	-	2692732	2693886	1013	protein_coding	NA	7	22	27	23	55	30	0.354793	1.3878	1.59391	1.33961	3.08337	1.65072
FBgn0000097	1055.19	1059.39	1011.38	1140.54	1014.79	1021.34	-0.021971	0.91264	0.99972	aop	2L	-	2156484	2178754	5454	protein_coding	NA	1362	844	1030	1479	880	888	15.75	12.1471	13.8728	19.6538	11.2557	11.1479
FBgn0000099	878.549	1232.61	1005.49	390.204	746.104	1016.74	0.42314	0.18222	0.99972	ap	2R	-	5706202	5727525	4320	protein_coding	NA	1134	982	1024	506	647	884	19.3756	20.8825	20.3781	9.93497	12.2273	16.3972
FBgn0000100	29130.8	40703.8	33610.1	20316.1	32602.6	36785.4	0.17558	0.5249	0.99972	RpLP0	3L	+	22075867	22077487	1328	protein_coding	NA	37601	32428	34229	26345	28272	31983	1520.14	1631.67	1611.76	1223.93	1264.23	1403.71
FBgn0000108	11.621	25.1041	14.7288	16.9654	25.3699	27.6037	-0.28541	0.44945	0.99972	Appl	X	+	530501	579044	6383	protein_coding	NA	15	20	15	22	22	24	0.13521	0.224375	0.157482	0.227884	0.219343	0.234857
FBgn0000109	318.416	448.108	339.744	279.929	375.935	533.671	-0.086996	0.76537	0.99972	Aprt	3L	-	1883795	1885019	1021	protein_coding	NA	411	357	346	363	326	464	24.1998	26.1617	23.7284	24.5613	21.2311	29.6595
FBgn0000114	4745.25	2389.91	4087.73	7228.8	1711.31	3199.73	-0.077824	0.8301	0.99972	aret	2L	+	12175004	12313438	7791	protein_coding	NA	6125	1904	4163	9374	1484	2782	102.771	39.7613	81.3568	180.744	27.5413	50.6754
FBgn0000115	594.222	655.217	572.459	658.566	641.165	700.443	-0.12478	0.54869	0.99972	Arl1	3L	+	15983135	15984362	863	protein_coding	NA	767	522	583	854	556	609	45.6322	38.6522	40.3986	58.3859	36.5878	39.334
FBgn0000116	2345.9	2176.53	2309.47	3043.75	5923.86	2944.39	-0.66584	0.023216	0.59127	Argk	3L	-	9048781	9066027	3504	protein_coding	NA	3028	1734	2352	3947	5137	2560	77.5018	55.2374	70.1157	116.091	145.429	71.1329
FBgn0000117	3631.18	3102.87	3654.7	4852.1	3191.99	3395.25	-0.12347	0.61716	0.99972	arm	X	-	1891401	1900646	3564	protein_coding	NA	4687	2472	3722	6292	2768	2952	76.3234	50.1002	70.593	117.74	49.8556	52.186
FBgn0000119	367.999	514.634	561.658	414.11	394.386	386.452	0.24056	0.33522	0.99972	arr	2R	-	13453640	13483229	6024	protein_coding	NA	475	410	572	537	342	336	4.04851	4.34924	5.67832	5.25957	3.22413	3.10897
FBgn0000137	0.774735	3.76562	0	0	0	0	0.13527	0.40466	NA	ase	X	+	460747	463176	2430	protein_coding	NA	1	3	0	0	0	0	0.0211291	0.0788914	0	0	0	0
FBgn0000139	481.885	633.879	692.253	510.504	463.576	521.02	0.24443	0.30783	0.99972	ash2	3R	+	24650125	24653376	2235	protein_coding	NA	622	505	705	662	402	453	20.6838	20.9006	27.3055	25.2971	14.786	16.3536
FBgn0000140	1846.97	907.513	1393.34	3716.19	435.9	1357.18	-0.24238	0.52813	0.99972	asp	3R	+	24753849	24760513	6338	protein_coding	NA	2384	723	1419	4819	378	1180	19.3126	7.28955	13.3887	44.8606	3.38697	10.3775
FBgn0000146	891.72	328.864	675.56	1192.98	221.41	558.975	-0.036425	0.92312	0.99972	aub	2L	-	10997819	11001476	3015	protein_coding	NA	1151	262	688	1547	192	486	20.9785	5.94332	14.6053	32.4014	3.87067	9.61637
FBgn0000147	343.982	149.369	413.388	670.904	183.355	271.436	-0.20559	0.57941	0.99972	aurA	3R	+	11963124	11964826	1577	protein_coding	NA	444	119	421	870	159	236	14.4557	4.82203	15.9647	32.5498	5.72581	8.34146
FBgn0000150	11069.4	14851.6	11476.7	11464	9991.11	13440.7	0.089604	0.70554	0.99972	awd	3R	-	31745172	31746077	727	protein_coding	NA	14288	11832	11688	14866	8664	11686	1135.6	1170.42	1081.97	1357.76	761.654	1008.31
FBgn0000152	71.2756	117.989	101.138	139.579	99.1731	120.766	-0.26114	0.37985	0.99972	Axs	X	-	16680089	16683895	2575	protein_coding	NA	92	94	103	181	86	105	1.83441	2.33274	2.39204	4.14727	1.89668	2.27287
FBgn0000153	143.326	332.629	213.076	137.265	304.438	346.196	-0.14158	0.68324	0.99972	b	2L	+	13821248	13823979	2135	protein_coding	NA	185	265	217	178	264	301	4.60649	8.21244	6.29332	5.09321	7.27088	8.13654
FBgn0000157	20.1431	35.1457	26.5118	27.7616	46.127	21.8529	-0.15858	0.66427	0.99972	Dll	2R	+	24814822	24835667	3309	protein_coding	NA	26	28	27	36	40	19	0.533547	0.715131	0.645335	0.848938	0.907914	0.42328
FBgn0000158	147.2	40.1666	87.3908	190.475	81.8754	49.4566	-0.13794	0.71808	0.99972	bam	3R	-	25243039	25245057	1894	protein_coding	NA	190	32	89	247	71	43	5.15063	1.07965	2.81008	7.69445	2.12888	1.26547
FBgn0000163	828.966	827.18	726.62	1182.18	1316.93	753.351	-0.38926	0.14292	0.99972	baz	X	+	17160006	17200705	15831	protein_coding	NA	1070	659	740	1533	1142	655	3.98042	3.05111	3.20626	6.55331	4.6989	2.64521
FBgn0000166	546.963	279.911	389.822	1152.88	55.3524	472.713	-0.23526	0.54723	0.99972	bcd	3R	-	6755842	6759466	2536	protein_coding	NA	706	223	397	1495	48	411	15.692	6.1689	10.2775	38.1847	1.18005	9.91726
FBgn0000173	1801.26	1807.5	1906.89	2122.99	1860.07	1933.41	-0.094496	0.63185	0.99972	ben	X	+	13996345	13999805	2072	protein_coding	NA	2325	1440	1942	2753	1613	1681	71.0137	54.7406	69.0861	96.6271	54.4927	55.7393
FBgn0000179	10.0716	5.02082	6.87343	12.3385	11.5318	4.60061	-0.16896	0.66454	0.99972	bi	X	+	4412856	4485647	6095	protein_coding	NA	13	4	7	16	10	4	0.138709	0.0531189	0.0869924	0.19618	0.118017	0.0463336
FBgn0000180	33.3136	22.5937	14.7288	23.1346	16.1445	5.75077	0.35106	0.36668	0.99972	bib	2L	+	9984645	9995538	3276	protein_coding	NA	43	18	15	30	14	5	0.673925	0.35111	0.273814	0.540304	0.242692	0.0850722
FBgn0000181	9490.5	10359.2	11014.2	10001.9	10211.4	10950.6	-0.013015	0.94714	0.99972	bic	2R	+	12870249	12871794	1546	protein_coding	NA	12250	8253	11217	12970	8855	9521	510.105	427.724	544.03	620.637	407.847	430.409
FBgn0000183	1633.92	1300.39	1424.76	2200.87	1371.13	1221.46	-0.11735	0.67064	0.99972	BicD	2L	-	17459605	17473215	5498	protein_coding	NA	2109	1036	1451	2854	1189	1062	24.9444	15.2505	19.9888	38.7905	15.5548	13.6363
FBgn0000210	195.233	55.229	80.5174	130.325	94.5604	24.1532	0.23463	0.5442	0.99972	br	X	+	1575132	1664869	16093	protein_coding	NA	252	44	82	169	82	21	2.67658	0.581649	1.01442	2.06272	0.963339	0.242144
FBgn0000212	1551.79	1184.91	1623.11	2582.6	1011.33	1177.76	-0.10161	0.75453	0.99972	brm	3L	-	15970082	15982869	5597	protein_coding	NA	2003	944	1653	3349	877	1024	19.144	11.2293	18.4012	36.7824	9.27119	10.6249
FBgn0000221	90.644	97.906	91.3185	151.917	116.471	101.214	-0.34567	0.21652	0.99972	brn	X	+	4104342	4105791	1450	protein_coding	NA	117	78	93	197	101	88	4.1429	3.43749	3.83552	8.01602	3.95572	3.3828
FBgn0000228	951.374	803.331	838.559	1434.35	618.102	740.699	-0.087027	0.77815	0.99972	Bsg25D	2L	-	5271728	5278548	4953	protein_coding	NA	1228	640	854	1860	536	644	15.8099	10.2551	12.8059	27.5181	7.63276	9.00103
FBgn0000229	287.427	347.692	242.534	178.908	358.637	295.589	0.062949	0.83339	0.99972	bsk	2L	-	10247502	10250501	2018	protein_coding	NA	371	277	247	232	311	257	11.4612	10.6503	8.8874	8.23602	10.6268	8.61914
FBgn0000233	6.97261	1.25521	12.7649	13.8808	48.4334	6.90092	-0.6353	0.094983	0.99972	btd	X	+	9694186	9697558	2934	protein_coding	NA	9	1	13	18	42	6	0.157496	0.0217798	0.264967	0.36197	0.812945	0.113986
FBgn0000239	1884.93	2062.3	1949.11	2203.96	1752.83	2538.39	-0.12633	0.5827	0.99972	bur	2L	-	21174182	21179683	3116	protein_coding	NA	2433	1643	1985	2858	1520	2207	41.4188	34.8114	39.3585	55.9103	28.621	40.788
FBgn0000241	240.168	254.807	144.342	98.7078	268.69	370.349	-0.14324	0.68913	0.99972	bw	2R	-	23527805	23538499	2738	protein_coding	NA	310	203	147	128	233	322	6.07965	4.95497	3.35781	2.8847	5.05427	6.85564
FBgn0000244	692.613	882.409	742.331	433.389	1042.47	884.468	-0.020851	0.94622	0.99972	by	3R	-	9528238	9533011	4774	protein_coding	NA	894	703	756	562	904	769	11.3392	11.0976	11.1684	8.19137	12.6824	10.5888
FBgn0000246	247.915	159.411	261.19	222.092	104.939	82.8111	0.52014	0.12885	0.99972	c(3)G	3R	-	15789473	15792579	2629	protein_coding	NA	320	127	266	288	91	72	6.28778	3.10584	6.08767	6.503	1.97776	1.53587
FBgn0000247	868.478	810.863	847.396	963.172	680.373	728.047	0.081544	0.72777	0.99972	ca	3R	+	29806811	29815047	7026	protein_coding	NA	1121	646	863	1249	590	633	8.57513	6.15029	7.68896	10.9792	4.99197	5.2567
FBgn0000250	3769.86	4491.12	3947.31	4976.26	5791.24	5059.53	-0.34612	0.094881	0.99972	cact	2L	-	16313036	16326207	3324	protein_coding	NA	4866	3578	4020	6453	5022	4399	119.769	109.608	115.245	182.519	136.721	117.544
FBgn0000251	1131.11	548.525	1046.73	1796.79	283.681	723.447	-0.025506	0.94628	0.99972	cad	2L	+	20770731	20783135	2570	protein_coding	NA	1460	437	1066	2330	246	629	30.2265	11.2602	25.7048	55.4326	5.6332	14.1371
FBgn0000253	7642.76	7811.14	7270.13	7990.7	7495.64	7487.5	-0.014841	0.9373	0.99972	Cam	2R	+	12259398	12278809	5812	protein_coding	NA	9865	6223	7404	10362	6500	6510	199.49	156.622	174.386	240.792	145.386	142.916
FBgn0000256	660.849	876.133	756.078	743.393	1199.3	948.877	-0.29209	0.26162	0.99972	capu	2L	-	3872646	3902860	6240	protein_coding	NA	853	698	770	964	1040	825	11.1327	11.338	11.7048	14.4578	15.0131	11.6891
FBgn0000257	411.384	465.681	434.99	466.548	462.423	506.068	-0.11944	0.57401	0.99972	car	X	+	19566019	19569401	3205	protein_coding	NA	531	371	443	605	401	440	8.66057	7.53102	8.41546	11.3392	7.23405	7.79076
FBgn0000259	1767.17	1407.09	1602.49	1966.44	1546.41	1521.65	-0.068685	0.76415	0.99972	CkIIbeta	X	+	11792533	11801587	5705	protein_coding	NA	2281	1121	1632	2550	1341	1323	69.836	42.7157	58.1964	89.7156	45.4117	43.9732
FBgn0000261	7485.49	10498.5	8862.8	3470.97	10425.9	7313.83	0.26286	0.42208	0.99972	Cat	3L	+	18822604	18828188	1993	protein_coding	NA	9662	8364	9026	4501	9041	6359	248.912	268.177	270.83	133.249	257.621	177.846
FBgn0000273	1731.53	1638.04	1685.96	2171.57	1832.4	1842.55	-0.19453	0.33968	0.99972	Pka-C1	2L	-	9682315	9699297	5725	protein_coding	NA	2235	1305	1717	2816	1589	1602	23.0938	16.7825	20.6638	33.4368	18.1605	17.9703
FBgn0000274	2.3242	0	7.85535	6.94039	5.76588	0	-0.057291	0.84813	0.99972	Pka-C2	3R	-	30695537	30697138	1349	protein_coding	NA	3	0	8	9	5	0	0.114266	0	0.354903	0.393925	0.210645	0
FBgn0000276	904.89	1530.1	679.488	354.731	1305.39	1010.98	0.15419	0.66829	0.99972	CecA1	3R	+	30210874	30211273	339	protein_coding	NA	1168	1219	692	460	1132	879	176.901	229.784	122.072	80.0606	189.635	144.528
FBgn0000277	763.889	910.024	378.039	104.106	455.504	289.839	0.84653	0.021643	0.57165	CecA2	3R	+	30212156	30212568	355	protein_coding	NA	986	725	385	135	395	252	142.605	130.504	64.8547	22.4371	63.1889	39.5671
FBgn0000278	710.432	1592.86	587.188	372.468	1217.75	787.855	0.19262	0.59601	0.99972	CecB	3R	-	30213315	30213797	425	protein_coding	NA	917	1269	598	483	1056	685	110.782	190.804	84.1436	67.0531	141.106	89.8387
FBgn0000279	1880.28	4076.91	1599.55	1234.62	4872.16	2562.54	-0.13267	0.71825	0.99972	CecC	3R	+	30216484	30216938	386	protein_coding	NA	2427	3248	1629	1601	4225	2228	322.827	537.704	252.373	244.717	621.6	321.729
FBgn0000280	0	2.51041	0	0	0	0	0.066928	0.64315	NA	Cec-Psi1	3R	+	30211527	30211753	166	pseudogene	NA	0	2	0	0	0	0	0	0.769904	0	0	0	0
FBgn0000281	5.42314	7.53123	0.981919	0	10.3786	12.6517	-0.16612	0.61661	0.99972	Cec2	3R	+	30212903	30213142	201	pseudogene	NA	7	6	1	0	9	11	1.78809	1.90752	0.297518	0	2.54284	3.05041
FBgn0000283	2049.17	1343.07	1955	3023.7	943.297	1481.4	-0.020352	0.95235	0.99972	Cp190	3R	-	15270432	15275241	4293	protein_coding	NA	2645	1070	1991	3921	818	1288	32.7633	16.4958	28.7247	55.8127	11.2073	17.3202
FBgn0000286	1177.6	1059.39	1011.38	967.799	1028.63	962.678	0.12507	0.53936	0.99972	Cf2	2L	-	4876891	4883107	4315	protein_coding	NA	1520	844	1030	1255	892	837	20.5917	14.2304	16.252	19.5373	13.3659	12.3097
FBgn0000287	9.29682	7.53123	7.85535	6.16923	11.5318	6.90092	0.011626	0.97627	0.99972	salr	2L	+	11358873	11373636	5536	protein_coding	NA	12	6	8	8	10	6	0.134525	0.0837145	0.104456	0.103059	0.123996	0.0730209
FBgn0000289	2108.83	1481.14	1872.52	2730.66	1178.54	1509	0.0092273	0.97624	0.99972	cg	2R	+	14173693	14182838	5429	protein_coding	NA	2722	1180	1907	3541	1022	1312	37.2687	20.1078	30.4108	55.7128	15.4772	19.5013
FBgn0000299	22364.3	47962.7	24321.2	17225.3	50558.7	36733.6	-0.10439	0.76372	0.99972	Cg25C	2L	+	5029609	5037279	6165	protein_coding	NA	28867	38211	24769	22337	43843	31938	250.7	413.018	250.543	222.921	421.151	301.117
FBgn0000303	4.64841	5.02082	8.83727	2.31346	6.91905	12.6517	-0.082483	0.8281	0.99972	Cha	3R	+	18705501	18732344	4011	protein_coding	NA	6	4	9	3	6	11	0.0901293	0.074783	0.157463	0.0517857	0.0996899	0.179383
FBgn0000307	1709.07	1073.2	1559.29	2453.81	855.656	1097.25	-0.016402	0.96127	0.99972	chif	2L	-	16342430	16352628	7747	protein_coding	NA	2206	855	1588	3182	742	954	17.544	8.46287	14.7094	29.0802	6.52698	8.23657
FBgn0000308	5410.75	6363.89	5165.88	5431.24	7640.94	6392.55	-0.18078	0.43615	0.99972	chic	2L	-	5972115	5981018	2632	protein_coding	NA	6984	5070	5261	7043	6626	5558	260.032	234.941	228.146	301.338	272.872	224.655
FBgn0000316	684.091	525.931	665.741	690.183	581.2	573.927	0.021525	0.9262	0.99972	cin	X	+	255674	258469	2110	protein_coding	NA	883	419	678	895	504	499	21.7754	12.8602	19.4741	25.3631	13.7474	13.3592
FBgn0000317	677.893	650.196	667.705	705.606	651.544	481.914	0.10508	0.65948	0.99972	ck	2L	-	15044963	15057862	7404	protein_coding	NA	875	518	680	915	565	419	6.20349	4.57074	5.61512	7.45458	4.43059	3.22491
FBgn0000318	888.621	1143.49	922.022	926.927	1458.77	1205.36	-0.24741	0.33253	0.99972	cl	2L	+	5520135	5521382	716	protein_coding	NA	1147	911	939	1202	1265	1048	89.3645	88.3381	85.2097	107.617	109.013	88.6416
FBgn0000319	6836.26	8942.08	6528.78	6435.28	9496.4	8358.17	-0.10858	0.66459	0.99972	Chc	X	-	15827986	15835490	6008	protein_coding	NA	8824	7124	6649	8345	8235	7267	79.4418	79.8244	69.7207	86.3344	82.0034	71.0254
FBgn0000320	115.435	65.2707	48.114	95.6231	72.65	14.952	0.18419	0.63326	0.99972	eya	2L	-	6527447	6546976	3690	protein_coding	NA	149	52	49	124	63	13	2.48706	1.08027	0.952618	2.37846	1.16312	0.235569
FBgn0000326	358.702	402.921	426.153	372.468	314.817	464.662	0.038906	0.87548	0.99972	clt	2R	-	21617061	21619079	1844	protein_coding	NA	463	321	434	483	273	404	12.8916	11.1239	14.0747	15.4542	8.40763	12.2119
FBgn0000330	210.728	222.171	242.534	283.014	200.652	265.685	-0.13408	0.59395	0.99972	cm	X	-	7009006	7011145	1774	protein_coding	NA	272	177	247	367	174	231	8.61004	6.97328	9.10658	13.3498	6.09215	7.93821
FBgn0000337	6.97261	0	0	0.771154	2.30635	1.15015	0.09229	0.71566	0.99972	cn	2R	-	7782797	7785067	1790	protein_coding	NA	9	0	0	1	2	1	0.258153	0	0	0.0329616	0.0634525	0.0311393
FBgn0000339	514.424	591.202	597.989	572.196	638.859	561.275	-0.052717	0.80634	0.99972	cni	2L	-	16309292	16310726	1182	protein_coding	NA	664	471	609	742	554	488	36.2683	32.019	38.7435	46.5733	33.4699	28.937
FBgn0000346	60.4293	26.3593	43.2044	24.6769	69.1905	13.8018	0.16146	0.67649	0.99972	comt	X	+	13259021	13262488	3087	protein_coding	NA	78	21	44	32	60	12	1.31047	0.439118	0.86101	0.617813	1.11499	0.218872
FBgn0000351	279.679	151.88	231.733	461.15	78.4159	186.325	-0.083016	0.82585	0.99972	cort	2L	-	6674682	6676635	1655	protein_coding	NA	361	121	236	598	68	162	11.4343	4.76999	8.70639	21.766	2.38231	5.57049
FBgn0000352	726.701	409.197	652.976	1129.74	270.996	466.962	-0.043163	0.90527	0.99972	cos	2R	-	7382176	7387115	4763	protein_coding	NA	938	326	665	1465	235	406	10.4925	4.53858	8.66399	18.8315	2.90755	4.93032
FBgn0000355	4900.2	551.035	373.129	2163.86	2057.26	852.264	0.095219	NA	NA	Cp15	3L	+	8728481	8729066	515	protein_coding	NA	6325	439	380	2806	1784	741	630.58	54.4719	44.1251	321.47	196.725	80.1997
FBgn0000356	320.74	5.02082	139.433	151.917	171.823	24.1532	0.099582	0.76478	0.99972	Cp16	3L	+	8731944	8732599	522	protein_coding	NA	414	4	142	197	149	21	40.7208	0.489671	16.2677	22.2667	16.2102	2.24239
FBgn0000357	1173.72	27.6145	227.805	294.581	198.346	57.5077	0.34132	0.31696	0.99972	Cp18	3L	+	8726791	8727613	649	protein_coding	NA	1515	22	232	382	172	50	119.855	2.16617	21.3773	34.728	15.0507	4.29425
FBgn0000358	571.754	6.27603	454.629	445.727	540.839	92.0123	-0.014267	0.96532	0.99972	Cp19	3L	+	8729865	8730604	651	protein_coding	NA	738	5	463	578	469	80	58.2053	0.490799	42.5313	52.3851	40.9132	6.84969
FBgn0000359	2276.17	13.8073	1052.62	2402.92	467.036	108.114	0.029308	0.9216	0.99972	Cp36	X	+	8479319	8480523	1116	protein_coding	NA	2938	11	1072	3116	405	94	135.168	0.629859	57.4433	164.738	20.6093	4.69489
FBgn0000360	2434.99	12.5521	1127.24	2491.6	625.021	98.9132	0.026416	0.92882	0.99972	Cp38	X	+	8481837	8483311	1249	protein_coding	NA	3143	10	1148	3231	542	86	136.641	0.541084	58.1301	161.416	26.0628	4.05892
FBgn0000370	10639.4	14921.9	12007.9	7456.29	15361.4	15465	-0.022274	0.94068	0.99972	crc	2L	+	21310866	21319527	3423	protein_coding	NA	13733	11888	12229	9669	13321	13446	330.104	355.65	342.372	267.08	354.166	350.876
FBgn0000376	911.863	461.916	910.239	1408.9	419.756	552.074	-0.042099	0.9066	0.99972	crm	X	-	2734248	2738773	3886	protein_coding	NA	1177	368	927	1827	364	480	15.8654	6.17379	14.5538	28.3001	5.42703	7.02412
FBgn0000377	453.995	474.468	478.195	576.052	463.576	563.575	-0.17313	0.43144	0.99972	crn	X	-	2247594	2249983	2332	protein_coding	NA	586	378	487	747	402	490	12.902	10.3581	12.4885	18.8996	9.7897	11.712
FBgn0000382	1958.53	2115.02	1998.21	2065.92	1684.79	1590.66	0.16906	0.43339	0.99972	csw	X	+	2094234	2115701	8732	protein_coding	NA	2528	1685	2035	2679	1461	1383	22.1421	18.3683	20.76	26.9642	14.1539	13.1504
FBgn0000384	666.272	425.515	570.495	870.633	411.683	594.629	-0.14287	0.63849	0.99972	cta	2L	+	22981816	22992951	2764	protein_coding	NA	860	339	581	1129	357	517	17.9494	8.80602	14.1238	27.0782	8.24148	11.7143
FBgn0000394	240.168	292.463	245.48	162.714	396.692	319.743	-0.13895	0.65875	0.99972	cv	X	+	5690002	5693084	2053	protein_coding	NA	310	233	250	211	344	278	9.65809	9.0347	9.07177	7.55416	11.8542	9.40263
FBgn0000395	342.433	448.108	328.943	219.008	333.268	305.941	0.33199	0.21515	0.99972	cv-2	2R	-	21355015	21379464	4329	protein_coding	NA	442	357	335	284	289	266	5.2423	5.26982	4.62771	3.87072	3.79125	3.42496
FBgn0000404	5671.83	2524.22	5085.36	10255.6	1682.48	3654.04	-0.14392	0.70421	0.99972	CycA	3L	-	11826719	11833578	2919	protein_coding	NA	7321	2011	5179	13299	1459	3177	137.386	46.9689	113.198	286.79	30.2838	64.7236
FBgn0000405	12820.3	5553.03	11833.1	22810.7	3216.21	8121.23	-0.1067	0.78027	0.99972	CycB	2R	-	22803521	22806948	3047	protein_coding	NA	16548	4424	12051	29580	2789	7061	327.918	109.109	278.141	673.583	61.1298	151.901
FBgn0000406	17151.9	28852.1	25114.5	8303.02	15888.4	25153.9	0.40011	0.23151	0.99972	Cyt-b5-r	2L	-	16788774	16790721	1557	protein_coding	NA	22139	22986	25577	10767	13778	21870	752.282	972.106	1012.26	420.427	517.838	806.763
FBgn0000409	3135.35	3670.22	2677.69	2345.85	3419.16	3472.31	0.033484	0.89495	0.99972	Cyt-c-p	2L	+	16719932	16722644	681	protein_coding	NA	4047	2924	2727	3042	2965	3019	315.787	283.966	247.838	272.768	255.9	255.74
FBgn0000411	6.97261	1.25521	15.7107	50.125	29.9826	11.5015	-0.82374	0.033789	0.74218	D	3L	-	14175610	14178620	2935	protein_coding	NA	9	1	16	65	26	10	0.203207	0.0281012	0.420764	1.68649	0.649314	0.245116
FBgn0000412	1967.05	1454.78	1903.94	3014.44	1438.01	1563.06	-0.14337	0.63685	0.99972	D1	3R	-	9238083	9240654	1877	protein_coding	NA	2539	1159	1939	3909	1247	1359	76.0569	43.2103	67.6513	134.56	41.3169	44.1947
FBgn0000413	1506.86	918.81	1391.38	1954.88	807.223	1085.74	-0.0093057	0.97689	0.99972	da	2L	+	10388105	10393228	3603	protein_coding	NA	1945	732	1417	2535	700	944	30.3629	14.222	25.7641	45.4752	12.0867	15.9982
FBgn0000414	932.781	917.555	988.793	1018.69	684.986	730.347	0.19715	0.41697	0.99972	Dab	3L	+	16712126	16724575	9270	protein_coding	NA	1204	731	1007	1321	594	635	7.53508	5.69386	7.34028	9.50031	4.11181	4.31429
FBgn0000416	23815.4	32968	24454.7	18178.4	35987.1	34181.4	-0.10067	0.73062	0.99972	Sap-r	3R	-	30883464	30889062	3527	protein_coding	NA	30740	26265	24905	23573	31207	29719	464.891	494.37	438.688	409.671	522.016	487.928
FBgn0000422	1862.46	4477.32	2641.36	1648.73	3110.11	2786.82	0.19499	0.54943	0.99972	Ddc	2L	-	19116483	19120306	2797	protein_coding	NA	2404	3567	2690	2138	2697	2423	54.3745	100.413	70.8656	55.5703	67.4725	59.4962
FBgn0000426	304.471	143.093	275.919	422.593	234.095	255.334	-0.25944	0.42455	0.99972	SmF	2R	-	12183844	12184310	467	protein_coding	NA	393	114	281	548	203	222	43.2078	15.5992	35.9831	69.2348	24.686	26.4971
FBgn0000427	4715.04	4645.51	1318.72	2390.58	1221.21	495.716	0.84273	0.026788	0.64901	2019-12-01	X	-	7867161	7873222	5748	protein_coding	NA	6086	3701	1343	3100	1059	431	71.6527	54.231	18.4162	41.9408	13.7906	5.50875
FBgn0000442	3.87367	7.53123	1.96384	7.71154	2.30635	1.15015	0.054627	0.8764	0.99972	Pkg21D	2L	-	786153	790798	2583	protein_coding	NA	5	6	2	10	2	1	0.0993877	0.148437	0.0463036	0.228421	0.0439721	0.0215793
FBgn0000447	544.639	597.478	578.35	644.685	488.946	562.425	0.017419	0.93823	0.99972	Dhod	3R	-	8651391	8652916	1472	protein_coding	NA	703	476	589	836	424	489	25.5266	21.5116	24.9101	34.8833	17.029	19.2762
FBgn0000448	49.583	42.677	11.783	20.8212	42.6675	17.2523	0.20992	0.58801	0.99972	Hr46	2R	-	10203995	10237348	10752	protein_coding	NA	64	34	12	27	37	15	0.562093	0.371651	0.122753	0.272499	0.35943	0.143019
FBgn0000449	5.42314	3.76562	0.981919	16.9654	0	2.30031	-0.19545	0.53909	0.99972	dib	3L	+	4062292	4064551	1975	protein_coding	NA	7	3	1	22	0	2	0.181978	0.0970664	0.030279	0.657228	0	0.0564449
FBgn0000451	79.7977	57.7394	90.3366	75.5731	237.554	34.5046	-0.35503	0.35639	0.99972	ect	3L	-	10190276	10201837	3741	protein_coding	NA	103	46	92	98	206	30	2.49688	1.38786	2.59759	2.72999	5.52348	0.789509
FBgn0000454	3037.74	3758.08	2811.23	2894.14	4115.68	2911.04	-0.041061	0.86926	0.99972	Dip-B	3R	+	13782288	13785676	2102	protein_coding	NA	3921	2994	2863	3753	3569	2531	102.818	97.7134	87.4415	113.091	103.516	72.0512
FBgn0000455	650.003	824.67	634.32	483.514	921.387	818.909	-0.063951	0.82252	0.99972	Dip-C	3R	-	12411809	12413759	1951	protein_coding	NA	839	657	646	627	799	712	23.2976	22.7061	20.8932	20.0074	24.5404	21.4637
FBgn0000459	4.64841	6.27603	4.9096	9.25385	39.208	19.5526	-0.99555	0.010855	0.37776	disco	X	-	16210598	16216750	3247	protein_coding	NA	6	5	5	12	34	17	0.0975806	0.101207	0.0947119	0.224268	0.611612	0.300148
FBgn0000463	691.838	390.369	813.029	1268.55	204.112	526.77	-0.048818	0.89723	0.99972	Dl	3R	-	19302731	19326217	5278	protein_coding	NA	893	311	828	1645	177	458	10.2618	4.44797	11.0822	21.7227	2.24974	5.71365
FBgn0000464	482.66	342.671	455.61	636.202	392.08	419.806	-0.15119	0.58555	0.99972	Lar	2L	+	19586623	19732069	10337	protein_coding	NA	623	273	464	825	340	365	3.94513	2.15161	3.42226	6.00345	2.38143	2.50923
FBgn0000473	55.0062	52.7186	57.9332	108.733	155.679	217.379	-1.2299	7.823e-05	0.010904	Cyp6a2	2R	-	6779749	6781491	1674	protein_coding	NA	71	42	59	141	135	189	2.17766	1.60328	2.10768	4.96963	4.57984	6.29315
FBgn0000477	800.301	1590.35	963.263	652.397	1307.7	1939.16	-0.16087	0.6389	0.99972	DNaseII	3R	+	18019375	18021161	1228	protein_coding	NA	1033	1267	981	846	1134	1686	43.1906	65.9315	47.7727	40.6474	52.4429	76.5281
FBgn0000479	888.621	522.165	597.989	1218.42	742.645	663.639	-0.31494	0.29807	0.99972	dnc	X	+	3176440	3343767	16683	protein_coding	NA	1147	416	609	1580	644	577	10.3572	4.67521	6.405	16.395	6.43207	5.65628
FBgn0000482	326.163	389.114	251.371	408.712	318.276	324.343	-0.10762	0.68223	0.99972	dor	X	+	1665052	1668451	3161	protein_coding	NA	421	310	256	530	276	282	6.83824	6.26689	4.84311	9.89264	4.95857	4.97263
FBgn0000489	264.959	257.317	263.154	144.206	633.093	210.478	-0.22272	0.54238	0.99972	Pka-C3	3L	-	15925805	15954797	3091	protein_coding	NA	342	205	268	187	549	183	7.19064	5.36442	6.56294	4.51811	12.7673	4.17703
FBgn0000490	197.557	423.004	264.136	170.425	464.73	272.586	-0.027383	0.93684	0.99972	dpp	2L	+	2428372	2459823	5214	protein_coding	NA	255	337	269	221	403	237	3.65002	6.00362	4.48466	3.63514	6.38037	3.6828
FBgn0000492	453.22	487.02	438.918	137.265	327.502	383.001	0.54794	0.091626	0.99972	Dr	3R	+	29556386	29565244	2552	protein_coding	NA	585	388	447	178	284	333	11.7696	9.71552	10.4746	4.11529	6.31989	7.2732
FBgn0000497	64.303	101.672	82.4812	57.8366	172.976	101.214	-0.30069	0.3909	0.99972	ds	2L	-	640013	714983	12427	protein_coding	NA	83	81	84	75	150	88	0.347001	0.421469	0.409029	0.36032	0.693632	0.399402
FBgn0000499	577.177	466.936	596.025	1021.78	438.207	503.767	-0.20696	0.51304	0.99972	dsh	X	+	11355881	11358724	2844	protein_coding	NA	745	372	607	1325	380	438	13.4497	8.3585	12.7635	27.4882	7.58797	8.58433
FBgn0000500	0	7.53123	0	0	3.45953	2.30031	0.035402	0.87822	0.99972	Dsk	3R	-	4189692	4190260	569	protein_coding	NA	0	6	0	0	3	2	0	0.673835	0	0	0.29942	0.19592
FBgn0000504	773.185	950.19	843.469	448.812	907.549	785.555	0.21966	0.44476	0.99972	dsx	3R	-	7924323	7967408	9053	protein_coding	NA	998	757	859	582	787	683	12.0823	11.4062	12.1125	8.09684	10.5385	8.97665
FBgn0000520	278.905	203.343	277.883	333.91	177.589	244.983	0.0048871	0.98669	0.99972	dwg	X	+	2727698	2730042	2002	protein_coding	NA	360	162	283	433	154	213	9.23263	5.1709	8.4534	12.761	4.36846	5.93031
FBgn0000524	908.764	556.056	840.523	1319.45	366.71	577.377	0.018445	0.95829	0.99972	dx	X	+	6533999	6538575	3828	protein_coding	NA	1173	443	856	1711	318	502	15.7331	7.39514	13.3724	26.3717	4.71766	7.3096
FBgn0000527	71.2756	183.26	119.794	80.2	242.167	138.018	-0.20584	0.5701	0.99972	e	3R	-	21229839	21237177	3142	protein_coding	NA	92	146	122	104	210	120	1.50338	2.96935	2.322	1.95294	3.79564	2.12881
FBgn0000533	233.97	234.723	282.793	312.317	277.915	305.941	-0.22958	0.32316	0.99972	ea	3R	+	15328729	15330408	1527	protein_coding	NA	302	187	288	405	241	266	10.484	8.07957	11.6448	16.1565	9.25381	10.0248
FBgn0000535	0	12.5521	4.9096	1.54231	23.0635	3.45046	-0.15369	0.63695	0.99972	eag	X	+	14955477	15009989	10636	protein_coding	NA	0	10	5	2	20	3	0	0.0919851	0.0430409	0.0169861	0.163495	0.0240705
FBgn0000536	3862.05	4643	4068.09	2311.15	4673.82	5948.59	-0.032684	0.91608	0.99972	eas	X	+	16278328	16285618	4627	protein_coding	NA	4985	3699	4143	2997	4053	5172	88.1364	81.3959	85.3154	60.8907	79.2596	99.2713
FBgn0000541	3449.89	1929.25	3121.52	4909.17	1458.77	2040.37	0.011214	0.97455	0.99972	E(bx)	3L	-	233926	246912	10072	protein_coding	NA	4453	1537	3179	6366	1265	1774	26.6472	11.4473	22.1571	43.7764	8.37288	11.5247
FBgn0000542	72.0503	114.224	61.8609	72.4885	122.237	51.7569	0.0048491	0.98881	0.99972	ec	X	+	3811698	3857621	8400	protein_coding	NA	93	91	63	94	106	45	0.70552	0.859203	0.556659	0.819461	0.889441	0.370607
FBgn0000543	389.692	370.286	440.882	639.287	364.403	439.359	-0.22883	0.40109	0.99972	ecd	3L	-	2263581	2265857	2204	protein_coding	NA	503	295	449	829	316	382	11.7177	8.55313	12.1827	22.1924	8.1423	9.66081
FBgn0000546	803.4	535.973	782.59	980.137	523.541	633.735	-0.0089984	0.97551	0.99972	EcR	2R	-	6087873	6169087	9934	protein_coding	NA	1037	427	797	1271	454	551	10.1185	5.18551	9.05767	14.2513	4.89978	5.83663
FBgn0000547	1378.25	1002.91	1205.8	1890.87	876.413	982.231	-0.05219	0.8647	0.99972	ed	2L	+	4031377	4115749	6425	protein_coding	NA	1779	799	1228	2452	760	854	16.5532	9.25294	13.3084	26.218	7.82175	8.62656
FBgn0000556	137343	155578	141165	120838	148851	163366	0.0031411	0.98856	0.99972	Ef1alpha48D	2R	+	11891135	11895762	2464	protein_coding	NA	177278	123946	143764	156697	129079	142038	4352.99	3787.85	4111.55	4421.48	3505.69	3786.28
FBgn0000557	27.1157	28.8697	44.1864	14.6519	136.075	39.1052	-0.47034	0.22862	0.99972	Ef1alpha100E	3R	+	31738468	31743306	2656	protein_coding	NA	35	23	45	19	118	34	0.691431	0.565505	1.03542	0.431328	2.57838	0.729179
FBgn0000559	51491.2	61181.2	53344.7	45650.8	55841.3	58487.6	0.048955	0.82141	0.99972	EF2	2L	-	21677913	21682164	3056	protein_coding	NA	66463	48742	54327	59198	48424	50852	1190.67	1086.78	1133.57	1218.69	959.525	988.994
FBgn0000560	1.54947	0	2.94576	1.54231	3.45953	6.90092	-0.27786	0.38673	0.99972	eg	3L	+	21808703	21817600	2033	protein_coding	NA	2	0	3	2	3	6	0.0647461	0	0.113117	0.0744025	0.107421	0.210868
FBgn0000562	1479.74	1127.17	1331.48	1937.14	1119.73	1293.92	-0.12389	0.64714	0.99972	egl	2R	-	23734904	23746829	4515	protein_coding	NA	1910	898	1356	2512	971	1125	23.5907	13.8042	19.5069	35.6533	13.2651	15.0846
FBgn0000565	1362.76	1742.22	1338.36	266.819	620.408	659.038	1.209	0.0001313	0.015604	Eip71CD	3L	+	15511052	15513202	1354	protein_coding	NA	1759	1388	1363	346	538	573	90.2233	88.6075	81.4274	20.394	30.5225	31.9067
FBgn0000566	1162.1	1212.53	1016.29	1145.16	1036.7	1199.61	0.0034937	0.98677	0.99972	Eip55E	2R	+	18627918	18629395	1478	protein_coding	NA	1500	966	1035	1485	899	1043	54.2363	43.4714	43.5874	61.7019	35.9537	40.9409
FBgn0000567	337.784	497.061	302.431	189.704	448.585	342.746	0.16787	0.6015	0.99972	Eip74EF	3L	-	17558672	17619325	9332	protein_coding	NA	436	396	308	246	389	298	3.81555	4.31314	3.13938	2.47389	3.76535	2.83114
FBgn0000568	1561.09	1858.96	1390.4	909.191	2135.68	1602.16	0.040902	0.89287	0.99972	Eip75B	3L	-	17950953	18064696	13451	protein_coding	NA	2015	1481	1416	1179	1852	1393	19.0109	17.3905	15.5601	12.7825	19.3265	14.2677
FBgn0000575	1167.53	1151.02	1188.12	846.727	974.433	916.672	0.33221	0.097687	0.99972	emc	3L	+	749400	753492	2049	protein_coding	NA	1507	917	1210	1098	845	797	37.7623	28.5984	35.3144	31.617	23.42	21.6809
FBgn0000576	3.87367	5.02082	3.92768	16.9654	36.9016	16.1021	-1.2393	0.0014916	0.099649	ems	3R	+	13901853	13904620	2478	protein_coding	NA	5	4	4	22	32	14	0.103599	0.103151	0.0965312	0.52382	0.733366	0.314911
FBgn0000577	3.87367	0	2.94576	7.71154	10.3786	3.45046	-0.45769	0.19989	0.99972	en	2R	-	11524006	11528210	2792	protein_coding	NA	5	0	3	10	9	3	0.0976487	0	0.0682401	0.224424	0.194412	0.0636052
FBgn0000578	1128.01	1605.41	1180.27	1285.51	1610.99	1081.14	-0.020852	0.93584	0.99972	ena	2R	+	19141632	19163705	6075	protein_coding	NA	1456	1279	1202	1667	1397	940	20.3696	22.27	19.5861	26.7997	21.6173	14.2766
FBgn0000579	14587.5	17997.1	14497.1	13186	15735.1	18379.5	-0.0060274	0.97935	0.99972	Eno	2L	-	1724768	1729636	3718	protein_coding	NA	18829	14338	14764	17099	13645	15980	425.881	403.625	388.944	444.432	341.365	392.385
FBgn0000581	2354.42	1491.18	2177.9	3334.47	1094.36	1722.93	-0.023076	0.94537	0.99972	E(Pc)	2R	+	11452043	11465270	10946	protein_coding	NA	3039	1188	2218	4324	949	1498	15.7594	7.66747	13.3965	25.7672	5.44326	8.43324
FBgn0000588	339.334	150.625	325.015	566.798	98.0199	266.836	-0.12097	0.74934	0.99972	esc	2L	-	11827204	11829405	1704	protein_coding	NA	438	120	331	735	85	232	13.1975	4.50015	11.6163	25.4495	2.83283	7.58892
FBgn0000592	3148.52	5263.08	3459.3	3096.18	6599.62	10315.7	-0.55816	0.10307	0.99972	Est-6	3L	+	12188818	12190705	1837	protein_coding	NA	4064	4193	3523	4015	5723	8969	117.555	150.953	118.693	133.459	183.104	281.648
FBgn0000606	0.774735	3.76562	0	10.7962	0	0	-0.12639	0.59218	0.99972	eve	2R	+	9979319	9980795	1406	protein_coding	NA	1	3	0	14	0	0	0.0365175	0.136349	0	0.587494	0	0
FBgn0000611	1479.74	1097.05	1162.59	1557.73	1300.78	1301.97	-0.13871	0.54998	0.99972	exd	X	+	15992468	15996509	3302	protein_coding	NA	1910	874	1184	2020	1128	1132	37.1886	21.1795	26.8504	45.1962	24.2924	23.9275
FBgn0000615	1456.5	702.915	1358.98	1875.45	435.9	1096.1	0.03146	0.93105	0.99972	exu	2R	-	20667427	20671083	3290	protein_coding	NA	1880	560	1384	2432	378	953	40.3875	14.9729	34.6296	60.038	8.98185	22.2258
FBgn0000617	239.393	234.723	275.919	297.666	205.265	230.031	0.027023	0.9158	0.99972	e(y)1	X	+	17842161	17843348	1124	protein_coding	NA	309	187	281	386	178	200	14.1149	10.6314	14.9503	20.262	8.99343	9.91803
FBgn0000618	125.507	146.859	150.234	138.808	152.219	161.021	-0.08613	0.73164	0.99972	e(y)2	X	-	11576118	11576620	503	protein_coding	NA	162	117	153	180	132	140	16.5361	14.8639	18.19	21.1137	14.9031	15.5139
FBgn0000625	2.3242	2.51041	0	2.31346	9.2254	12.6517	-0.57739	0.098389	0.99972	eyg	3L	-	12462537	12468021	3148	protein_coding	NA	3	2	0	3	8	11	0.0546016	0.0453045	0	0.062745	0.161049	0.217346
FBgn0000629	575.628	454.384	499.797	685.556	476.261	608.431	-0.18708	0.44719	0.99972	E(z)	3L	-	10634575	10638130	2665	protein_coding	NA	743	362	509	889	413	529	15.0724	9.13969	12.0264	20.7238	9.2668	11.65
FBgn0000633	11.621	2.51041	2.94576	2.31346	20.7572	9.20123	-0.288	0.43472	0.99972	fas	2R	+	13623044	13749367	5978	protein_coding	NA	15	2	3	3	18	8	0.129896	0.0215558	0.0302586	0.0298539	0.17241	0.0752091
FBgn0000635	417.582	404.176	260.209	269.904	522.388	259.935	0.032738	0.91764	0.99972	Fas2	X	-	4132887	4206093	7306	protein_coding	NA	539	322	265	350	453	226	7.58614	5.64048	4.3441	5.66075	7.05205	3.45315
FBgn0000636	465.616	618.816	395.713	408.712	713.815	509.518	-0.11826	0.6802	0.99972	Fas3	2L	+	18320102	18393441	6612	protein_coding	NA	601	493	403	530	619	443	10.1438	10.3563	7.92236	10.2796	11.5559	8.1172
FBgn0000639	2.3242	6.27603	3.92768	187.39	164.904	35.6548	-2.4738	1.7488e-10	6.8084e-08	Fbp1	3L	-	14094589	14098053	3465	protein_coding	NA	3	5	4	243	143	31	0.0449988	0.0933422	0.0698815	4.18851	2.37247	0.504797
FBgn0000640	3.87367	6.27603	0	80.9712	107.245	65.5587	-2.6546	2.2012e-12	1.0805e-09	Fbp2	2L	+	9426784	9427917	1074	protein_coding	NA	5	5	0	105	93	57	0.269097	0.334916	0	6.49384	5.53613	3.33034
FBgn0000644	277.355	107.948	37.3129	168.112	83.0286	56.3575	0.25427	0.51279	0.99972	Fcp3C	X	-	3173376	3174474	963	protein_coding	NA	358	86	38	218	72	49	19.0873	5.70673	2.35975	13.3564	4.24598	2.83616
FBgn0000658	1.54947	6.27603	2.94576	2.31346	5.76588	1.15015	0.051889	0.88028	0.99972	fj	2R	+	18232761	18236311	3551	protein_coding	NA	2	5	3	3	5	1	0.0289179	0.0899776	0.0505219	0.0498461	0.0799634	0.0156968
FBgn0000659	170.442	109.203	119.794	75.5731	166.057	77.0603	0.25051	0.45651	0.99972	fkh	3R	-	28580976	28585264	4289	protein_coding	NA	220	87	122	98	144	67	2.87274	1.41391	1.85548	1.47053	2.0798	0.94978
FBgn0000662	960.671	805.842	832.667	1372.65	612.336	866.066	-0.11046	0.71082	0.99972	fl(2)d	2R	-	13819624	13824553	2977	protein_coding	NA	1240	642	848	1780	531	753	26.157	16.855	20.8346	43.1479	12.3893	17.2439
FBgn0000667	1011.8	907.513	900.42	1178.32	1071.3	840.762	-0.11968	0.60455	0.99972	Actn	X	-	2023822	2042311	5272	protein_coding	NA	1306	723	917	1528	929	731	18.4673	12.7241	15.1026	24.8289	14.5299	11.2215
FBgn0000709	827.417	783.248	687.343	817.424	559.29	762.552	0.09149	0.70735	0.99972	fliI	X	+	21339741	21345088	4827	protein_coding	NA	1068	624	700	1060	485	663	11.3601	8.2608	8.67221	12.9565	5.70606	7.65593
FBgn0000711	679.443	596.223	594.061	859.066	686.139	576.227	-0.16293	0.50328	0.99972	flw	X	+	10385960	10409817	4276	protein_coding	NA	877	475	605	1114	595	501	15.8216	10.6653	12.7125	23.0946	11.8728	9.81216
FBgn0000715	0.774735	0	0	0	0	0	0.032879	0.81996	NA	FMRFa	2R	+	9906294	9910457	1427	protein_coding	NA	1	0	0	0	0	0	0.0359801	0	0	0	0	0
FBgn0000719	545.413	755.634	531.218	864.464	592.732	633.735	-0.16716	0.52697	0.99972	fog	X	-	22824317	22855194	6564	protein_coding	NA	704	602	541	1121	514	551	8.55323	9.10294	7.65556	15.6508	6.90726	7.26748
FBgn0000721	5914.33	6876.01	6404.08	5776.72	5236.57	6247.63	0.14178	0.48808	0.99972	for	2L	-	3622074	3656953	6929	protein_coding	NA	7634	5478	6522	7491	4541	5432	95.9504	85.6929	95.4768	108.195	63.1293	74.119
FBgn0000723	244.041	391.624	228.787	125.698	420.909	221.98	0.12243	0.72765	0.99972	FER	3R	-	9367603	9394546	5128	protein_coding	NA	315	312	233	163	365	193	4.69062	5.78232	4.04108	2.78921	6.0117	3.11998
FBgn0000808	41.8357	37.6562	39.2768	97.1654	23.0635	37.9551	-0.26707	0.47926	0.99972	gd	X	-	11985534	11987764	1941	protein_coding	NA	54	30	40	126	20	33	1.44179	0.996912	1.24391	3.86591	0.59064	0.956525
FBgn0000810	491.182	360.244	409.46	707.92	374.782	361.148	-0.16056	0.59517	0.99972	fs(1)K10	X	+	2242138	2246041	3052	protein_coding	NA	634	287	417	918	325	314	10.6658	6.00914	8.17072	17.7467	6.04743	5.73465
FBgn0000826	292.075	141.838	272.974	243.685	121.083	115.015	0.41656	0.22012	0.99972	png	X	-	1356488	1357601	1114	protein_coding	NA	377	113	278	316	105	100	17.3757	6.48199	14.9234	16.7364	5.35274	5.00353
FBgn0000927	1382.9	615.051	1309.88	2421.42	461.27	1123.7	-0.17859	0.63289	0.99972	fs(1)Ya	X	+	2724286	2726577	2235	protein_coding	NA	1785	490	1334	3140	400	977	41.006	14.0098	35.6933	82.892	10.1638	24.3657
FBgn0000928	22.4673	13.8073	13.7469	13.8808	20.7572	4.60061	0.18781	0.63043	0.99972	fs(1)Yb	X	+	2720468	2724158	3502	protein_coding	NA	29	11	14	18	18	4	0.425176	0.20072	0.239068	0.303261	0.291896	0.0636657
FBgn0000964	979.265	739.316	740.367	390.975	543.145	642.936	0.55539	0.038044	0.78379	tj	2L	+	19464267	19467758	3492	protein_coding	NA	1264	589	754	507	471	559	18.5849	10.7784	12.9124	8.56632	7.65982	8.92276
FBgn0000996	1659.48	744.337	1394.33	2866.38	634.246	1122.55	-0.18755	0.61227	0.99972	dup	2R	-	15376619	15380988	3138	protein_coding	NA	2142	593	1420	3717	550	976	37.2681	12.841	28.7758	74.3163	10.5844	18.435
FBgn0001075	3.87367	6.27603	11.783	8.4827	6.91905	11.5015	-0.13631	0.72618	0.99972	ft	2L	-	4198404	4221796	16852	protein_coding	NA	5	5	12	11	6	10	0.0152337	0.0189598	0.0425832	0.0385125	0.0202196	0.0330758
FBgn0001077	14.72	22.5937	26.5118	10.025	4.6127	4.60061	0.90785	0.019652	0.54816	ftz	3R	+	6864324	6866244	1774	protein_coding	NA	19	18	27	13	4	4	0.549904	0.648386	0.910163	0.432365	0.12805	0.125681
FBgn0001078	934.33	616.306	715.819	1186.04	434.747	615.332	0.01449	0.96488	0.99972	ftz-f1	3L	-	18750607	18801309	8581	protein_coding	NA	1206	491	729	1538	377	535	11.5978	5.87674	8.16538	16.9964	4.01008	5.58542
FBgn0001079	252.564	173.218	257.263	340.079	137.228	180.574	0.040103	0.90298	0.99972	fu	X	+	18657755	18661204	3251	protein_coding	NA	326	138	262	441	119	157	5.14858	2.71255	4.8194	8.00354	2.07875	2.69181
FBgn0001083	30.9894	53.9738	34.3672	14.6519	88.7945	27.6037	-0.07304	0.85088	0.99972	fw	X	-	11992915	12003914	4698	protein_coding	NA	40	43	35	19	77	24	0.475625	0.636357	0.484724	0.259616	1.0127	0.309806
FBgn0001084	65.8525	69.0363	86.4089	98.7078	49.5865	63.2584	0.043907	0.89236	0.99972	fy	2L	-	8401476	8403280	1688	protein_coding	NA	85	55	88	128	43	55	2.69729	2.1722	3.25247	4.66758	1.50925	1.89472
FBgn0001085	416.033	197.067	375.093	645.456	134.921	263.385	-0.051927	0.88922	0.99972	fz	3L	+	14274343	14368639	3817	protein_coding	NA	537	157	382	837	117	229	7.22336	2.62841	5.98481	12.9379	1.74075	3.34407
FBgn0001086	818.12	400.41	809.101	1686.51	302.132	709.645	-0.26359	0.48263	0.99972	fzy	2L	+	16310956	16313097	1996	protein_coding	NA	1056	319	824	2187	262	617	27.1638	10.2128	24.6874	64.6471	7.4544	17.23
FBgn0001087	1084.63	911.279	1006.47	1404.27	860.269	952.327	-0.087465	0.736	0.99972	g	X	-	13727204	13736278	4404	protein_coding	NA	1400	726	1025	1821	746	828	17.9793	11.604	15.3317	26.8737	10.5966	11.5438
FBgn0001089	241.717	370.286	239.588	253.71	859.115	415.205	-0.6101	0.080847	0.99972	Gal	2L	-	6003574	6006827	2345	protein_coding	NA	312	295	244	329	745	361	6.83998	8.04915	6.23034	8.28838	18.0651	8.59176
FBgn0001090	1521.58	2458.95	2284.93	1664.15	4696.88	3574.68	-0.51149	0.12048	0.99972	bnb	X	-	18794246	18797687	2726	protein_coding	NA	1964	1959	2327	2158	4073	3108	48.5971	60.3297	67.0637	61.3612	111.473	83.4881
FBgn0001091	8491.87	12553.3	8639.91	7689.18	10058	11089.8	0.036501	0.8884	0.99972	Gapdh1	2R	-	7791901	7793380	1480	protein_coding	NA	10961	10001	8799	9971	8722	9642	400.554	454.864	374.512	418.719	352.543	382.519
FBgn0001092	16101.3	17746.1	15522.2	15396.1	14388.2	18405.9	0.032063	0.88028	0.99972	Gapdh2	X	+	15868145	15869661	1443	protein_coding	NA	20783	14138	15808	19965	12477	16003	756.791	640.743	670.451	835.432	502.531	632.622
FBgn0001098	5653.24	7045.47	5532.13	4250.6	6526.97	5347.06	0.15701	0.52692	0.99972	Gdh	3R	-	23935958	23943101	2343	protein_coding	NA	7297	5613	5634	5512	5660	4649	187.703	179.701	168.797	162.933	161.038	129.826
FBgn0001099	16.2694	8.78644	13.7469	23.9058	13.8381	14.952	-0.26095	0.49663	0.99972	gdl	3L	+	15509445	15511047	1175	protein_coding	NA	21	7	14	31	12	13	1.02298	0.424397	0.794322	1.73533	0.646565	0.687487
FBgn0001104	1478.97	1561.48	1362.9	1901.67	1521.04	1661.97	-0.19126	0.36892	0.99972	Galphai	3L	-	6972750	6980044	2067	protein_coding	NA	1909	1244	1388	2466	1319	1445	47.419	38.4587	40.1567	70.3904	36.239	38.9663
FBgn0001105	2957.16	2667.31	3036.09	3447.83	3118.19	2906.44	-0.11979	0.55723	0.99972	Gbeta13F	X	+	15860115	15866175	5566	protein_coding	NA	3817	2125	3092	4471	2704	2527	42.383	29.3668	39.9881	57.0489	33.2094	30.4613
FBgn0001108	1389.87	1148.51	1236.24	1711.96	1113.97	1185.81	-0.077874	0.75717	0.99972	Gl	3L	+	13929387	13934656	4550	protein_coding	NA	1794	915	1259	2220	966	1031	20.2441	12.8506	16.5472	28.7874	12.057	12.6302
FBgn0001112	40.2862	48.953	45.1683	27.7616	153.372	94.3126	-0.64138	0.090277	0.99972	Gld	3R	-	7252063	7265703	2899	protein_coding	NA	52	39	46	36	133	82	0.920963	0.859669	0.948896	0.732681	2.60541	1.57662
FBgn0001114	13519.9	19684.1	12935.8	8621.51	18803.7	24007.2	-0.12136	0.71018	0.99972	Glt	2L	+	8672698	8676804	3373	protein_coding	NA	17451	15682	13174	11180	16306	20873	270.123	302.114	237.51	198.864	279.173	350.753
FBgn0001120	920.385	310.036	855.252	1486.79	314.817	629.134	-0.13891	0.71307	0.99972	gnu	3L	-	14802380	14803360	923	protein_coding	NA	1188	247	871	1928	273	547	66.0848	17.1006	56.432	123.244	16.797	33.0329
FBgn0001122	762.339	643.92	671.633	898.395	678.067	609.581	-0.065641	0.78854	0.99972	Galphao	2R	+	10437985	10465701	6415	protein_coding	NA	984	513	684	1165	588	530	18.9648	12.3055	15.3543	25.8019	12.5347	11.0893
FBgn0001123	416.033	540.993	405.533	304.606	643.472	501.467	-0.072906	0.80684	0.99972	Galphas	2R	+	23942538	23946936	2112	protein_coding	NA	537	431	413	395	558	436	15.6301	15.6133	14.001	13.2117	17.9642	13.7768
FBgn0001124	6298.59	11466.3	7931.94	4266.8	7952.29	9777.45	0.17755	0.57611	0.99972	Got1	2R	+	16138352	16141928	1770	protein_coding	NA	8130	9135	8078	5533	6896	8501	248.024	346.848	287.031	193.971	232.694	281.545
FBgn0001125	9404.51	17137.3	11022	7182.53	12403.6	15609.9	0.074912	0.81153	0.99972	Got2	2L	-	1984512	1987758	1734	protein_coding	NA	12139	13653	11225	9314	10756	13572	397.488	556.413	428.104	350.47	389.562	482.458
FBgn0001128	11378.5	15054.9	10558.6	7249.62	13515.2	16930.3	-0.022002	0.94269	0.99972	Gpdh	2L	+	5943643	5948968	3152	protein_coding	NA	14687	11994	10753	9401	11720	14720	396.887	403.39	338.443	291.932	350.305	431.833
FBgn0001133	361.801	370.286	421.243	462.693	431.287	404.854	-0.15726	0.47465	0.99972	grau	2R	-	21009764	21011921	1894	protein_coding	NA	467	295	429	600	374	352	12.6597	9.95307	13.5452	18.691	11.2141	10.3592
FBgn0001134	45.7094	42.677	40.2587	16.1942	69.1905	47.1563	-0.020126	0.9572	0.99972	Grd	3L	+	17823333	17839767	4071	protein_coding	NA	59	34	41	21	60	41	0.744111	0.533694	0.602271	0.304354	0.836993	0.561364
FBgn0001137	154.947	166.942	98.1919	171.967	194.887	113.865	-0.15878	0.6054	0.99972	grk	2L	-	8431086	8433598	1718	protein_coding	NA	200	133	100	223	169	99	5.97714	4.94702	3.48085	7.65848	5.58644	3.21199
FBgn0001138	1.54947	0	1.96384	0	0	10.3514	-0.14417	0.54124	0.99972	grn	3R	-	8147368	8181444	4090	protein_coding	NA	2	0	2	0	0	9	0.0264863	0	0.0308491	0	0	0.129392
FBgn0001139	2195.6	1361.9	1875.47	3360.69	1063.23	1587.21	-0.10864	0.75032	0.99972	gro	3R	+	26041736	26049911	4455	protein_coding	NA	2834	1085	1910	4358	922	1380	44.6755	21.2876	35.0691	78.946	16.0763	23.6169
FBgn0001142	2632.55	4767.27	3760.75	4060.9	5071.66	6479.96	-0.40819	0.15153	0.99972	Gs1	2L	+	132077	134472	2396	protein_coding	NA	3398	3798	3830	5266	4398	5634	83.4764	116.124	109.588	148.66	119.504	150.256
FBgn0001145	4660.03	6220.8	4569.85	2510.11	6076.08	6275.24	0.044358	0.88932	0.99972	Gs2	X	+	11422832	11430197	2231	protein_coding	NA	6015	4956	4654	3255	5269	5456	167.298	171.559	150.766	104.035	162.095	164.742
FBgn0001147	2.3242	0	0	4.62693	14.9913	0	-0.35221	0.19999	0.99972	gsb-n	2R	-	25040383	25052331	2237	protein_coding	NA	3	0	0	6	13	0	0.0688561	0	0	0.158251	0.330027	0
FBgn0001149	5803.54	7994.4	5695.13	8013.06	8671.88	8404.17	-0.32931	0.15241	0.99972	GstD1	3R	-	12367817	12369268	843	protein_coding	NA	7491	6369	5800	10391	7520	7307	461.17	488	415.883	735.109	512.063	488.354
FBgn0001150	9.29682	2.51041	4.9096	39.3289	11.5318	2.30031	-0.5635	0.1306	0.99972	gt	X	-	2427113	2428967	1780	protein_coding	NA	12	2	5	51	10	2	0.346137	0.0718001	0.167981	1.69048	0.319045	0.0626285
FBgn0001168	2895.18	4472.3	2583.43	1831.49	4790.29	3870.27	-0.058948	0.85732	0.99972	h	3L	+	8675759	8679253	2335	protein_coding	NA	3737	3563	2631	2375	4154	3365	85.7717	101.781	70.3338	62.6409	105.456	83.8457
FBgn0001169	1296.91	784.503	1214.63	1948.71	561.596	894.819	-0.034285	0.92186	0.99972	H	3R	+	20621938	20628915	6004	protein_coding	NA	1674	625	1237	2527	487	778	17.135	7.96228	14.7476	29.7241	5.5137	8.64537
FBgn0001170	1.54947	0	0	0	3.45953	0	-0.048624	0.76764	NA	H2.0	2L	-	6013059	6019402	1662	protein_coding	NA	2	0	0	0	3	0	0.0617854	0	0	0	0.102509	0
FBgn0001179	337.784	279.911	340.726	497.395	222.563	277.187	-0.04768	0.87724	0.99972	hay	3L	+	10631079	10633969	2628	protein_coding	NA	436	223	347	645	193	241	8.75131	5.57082	8.11219	14.8772	4.28478	5.25144
FBgn0001180	671.695	331.374	757.06	1063.42	102.633	343.896	0.12243	0.75263	0.99972	hb	3R	-	8690980	8697822	3835	protein_coding	NA	867	264	771	1379	89	299	13.6549	5.17489	14.1431	24.9579	1.5504	5.11229
FBgn0001185	208.404	150.625	229.769	268.362	179.895	152.97	-0.025949	0.93049	0.99972	her	2L	+	16677185	16679691	2378	protein_coding	NA	269	120	234	348	156	133	6.21018	3.44795	6.29202	9.2322	3.98347	3.33333
FBgn0001186	2575.22	2891.99	3159.82	2708.29	4303.65	3098.51	-0.20191	0.42253	0.99972	Hex-A	X	+	9585675	9589813	4139	protein_coding	NA	3324	2304	3218	3512	3732	2694	55.8829	48.209	63.0124	67.8494	69.3976	49.1689
FBgn0001187	2961.04	5878.13	4239.93	1715.05	4030.35	6421.31	0.074455	0.83317	0.99972	Hex-C	2R	-	15218837	15220329	1493	protein_coding	NA	3822	4683	4318	2224	3495	5583	131.437	200.438	172.954	87.8892	132.941	208.434
FBgn0001189	701.91	686.597	715.819	601.5	791.078	792.456	-0.048332	0.83046	0.99972	hfw	X	+	1669570	1673608	3038	protein_coding	NA	906	547	729	780	686	689	16.6789	12.533	15.631	16.5009	13.9684	13.77
FBgn0001197	2592.26	1452.27	2449.89	5231.51	1418.41	2124.33	-0.30575	0.39143	0.99972	His2Av	3R	+	26866929	26869220	1224	protein_coding	NA	3346	1157	2495	6784	1230	1847	165.03	71.0227	143.327	384.499	67.1006	98.8958
FBgn0001202	425.329	566.098	509.616	498.937	533.92	500.317	-0.028838	0.89888	0.99972	hk	2L	-	19030844	19033498	2317	protein_coding	NA	549	451	519	647	463	435	12.1656	12.4384	13.3952	16.4755	11.3482	10.4647
FBgn0001206	423.78	273.635	469.357	720.258	196.04	318.593	-0.058585	0.86939	0.99972	Hmr	X	-	10590920	10595855	4696	protein_coding	NA	547	218	478	934	170	277	5.98062	2.96649	6.08708	11.7349	2.05586	3.28786
FBgn0001208	5788.04	9435.38	7126.77	4003.83	7869.27	10589.5	-0.0056378	0.98605	0.99972	Hn	3L	+	7760453	7763166	2115	protein_coding	NA	7471	7517	7258	5192	6824	9207	232.76	291.476	263.371	185.882	235.155	311.403
FBgn0001215	3801.62	2963.54	4137.81	5028.7	2728.41	3028.35	0.013046	0.96345	0.99972	Hrb98DE	3R	+	28599834	28605777	2743	protein_coding	NA	4907	2361	4214	6521	2366	2633	128.477	76.9366	128.507	196.199	68.5187	74.8402
FBgn0001216	7.74735	6.27603	4.9096	11.5673	31.1357	10.3514	-0.71236	0.068353	0.99972	Hsc70-1	3L	+	13974061	13977761	2718	protein_coding	NA	10	5	5	15	27	9	0.210339	0.130893	0.122493	0.362564	0.628156	0.205512
FBgn0001217	8.52208	25.1041	11.783	18.5077	74.9564	39.1052	-0.84729	0.029302	0.68352	Hsc70-2	3R	+	13044759	13047388	2174	protein_coding	NA	11	20	12	24	65	34	0.259789	0.587875	0.330089	0.651347	1.69795	0.871728
FBgn0001218	16018.4	17805.1	13582.9	12947.7	15461.8	14376.9	0.13534	0.53499	0.99972	Hsc70-3	X	-	11801696	11807117	3589	protein_coding	NA	20676	14185	13833	16790	13408	12500	346.13	295.55	269.719	322.996	248.269	227.174
FBgn0001220	3724.93	4004.1	3618.37	3386.91	3317.68	3746.05	0.11067	0.57376	0.99972	Hsc70-5	2R	-	14252598	14256192	2922	protein_coding	NA	4808	3190	3685	4392	2877	3257	86.4054	71.3502	77.1323	90.7011	57.1875	63.5432
FBgn0001222	1521.58	994.123	1205.8	1977.24	931.765	1186.96	-0.1129	0.70997	0.99972	Hsf	2R	-	18130303	18134634	2910	protein_coding	NA	1964	792	1228	2564	808	1032	35.5442	17.8394	25.885	53.3236	16.1742	20.276
FBgn0001224	1824.5	2945.97	2009.99	1200.69	3314.22	2868.48	-0.09414	0.77588	0.99972	Hsp23	3L	+	9381882	9382765	884	protein_coding	NA	2355	2347	2047	1557	2874	2494	139.463	172.985	141.191	105.957	188.252	160.339
FBgn0001225	11866.6	12926.1	10619.5	16287.6	11595.2	12603.4	-0.1744	0.4522	0.99972	Hsp26	3L	-	9376418	9377427	1010	protein_coding	NA	15317	10298	10815	21121	10055	10958	799.218	668.764	657.265	1266.43	580.308	620.723
FBgn0001226	6143.65	5940.89	5498.75	7251.94	5702.45	5733.52	-0.080756	0.70717	0.99972	Hsp27	3L	+	9384063	9385694	1632	protein_coding	NA	7930	4733	5600	9404	4945	4985	285.523	212.096	234.843	389.093	196.933	194.853
FBgn0001227	14.72	15.0625	7.85535	10.7962	1.15318	9.20123	0.34113	0.37716	0.99972	Hsp67Ba	3L	-	9377802	9379534	1733	protein_coding	NA	19	12	8	14	1	8	0.562914	0.442484	0.276058	0.47664	0.0327698	0.257308
FBgn0001228	0	7.53123	3.92768	4.62693	1.15318	1.15015	0.12151	0.6907	0.99972	Hsp67Bb	3L	+	9372722	9374964	2109	protein_coding	NA	0	6	4	6	1	1	0	0.415849	0.259441	0.383956	0.0615944	0.0604548
FBgn0001229	169.667	279.911	183.619	118.758	384.007	341.596	-0.29871	0.3944	0.99972	Hsp67Bc	3L	-	9371511	9372497	987	protein_coding	NA	219	223	187	154	333	297	11.3924	14.4379	11.3301	9.20586	19.1602	16.7726
FBgn0001230	9504.45	16808.5	9430.35	4704.81	12267.5	11143.8	0.26276	0.43205	0.99972	Hsp68	3R	-	24055080	24057310	2231	protein_coding	NA	12268	13391	9604	6101	10638	9689	282.333	383.556	257.431	161.347	270.79	242.07
FBgn0001233	21682.5	21979.9	22833.5	26178.4	17406	16964.8	0.11998	0.62649	0.99972	Hsp83	3L	+	3192969	3197059	2960	protein_coding	NA	27987	17511	23254	33947	15094	14750	506.505	394.427	490.171	705.997	302.146	289.797
FBgn0001234	3291.85	5234.21	3305.14	1979.55	4146.82	3231.93	0.27487	0.36773	0.99972	Hsromega	3R	+	21296127	21317836	21710	lincRNA	NA	4249	4170	3366	2567	3596	2810	27.1782	33.1969	25.0767	18.8683	25.4412	19.5126
FBgn0001235	337.01	397.9	412.406	347.791	949.063	660.188	-0.60537	0.058648	0.95837	hth	3R	-	10507561	10639568	11839	protein_coding	NA	435	317	420	451	823	574	4.76114	4.31826	5.35418	5.67246	9.96337	6.82037
FBgn0001247	807.274	685.342	722.692	692.497	757.636	722.296	0.026922	0.89754	0.99972	Ide	3L	-	20371672	20375896	3439	protein_coding	NA	1042	546	736	898	657	628	15.5569	10.1455	12.7984	15.4065	10.8494	10.1786
FBgn0001248	9891.04	12909.8	10986.7	6699.02	9729.34	11614.2	0.23348	0.37723	0.99972	Idh	3L	-	8356404	8360906	2434	protein_coding	NA	12767	10285	11189	8687	8437	10098	361.16	362.112	368.658	282.393	263.987	310.113
FBgn0001250	725.927	1011.7	819.902	554.46	1605.22	1288.17	-0.33237	0.31095	0.99972	if	X	-	16752189	16783434	6011	protein_coding	NA	937	806	835	719	1392	1120	8.41214	9.00596	8.73123	7.4177	13.8226	10.9159
FBgn0001253	5.42314	0	4.9096	0	0	0	0.26887	0.22069	0.99972	ImpE1	3L	+	8372405	8391171	6264	protein_coding	NA	7	0	5	0	0	0	0.0825461	0	0.0686737	0	0	0
FBgn0001255	27.8905	6.27603	15.7107	9.25385	16.1445	10.3514	0.2605	0.50502	0.99972	ImpE3	3R	-	8028453	8029546	1094	protein_coding	NA	36	5	16	12	14	9	1.68955	0.292057	0.874604	0.647179	0.726746	0.45855
FBgn0001256	0.774735	1.25521	2.94576	0.771154	5.76588	1.15015	-0.11252	0.71302	0.99972	ImpL1	3L	+	13382765	13383999	1235	protein_coding	NA	1	1	3	1	5	1	0.043438	0.0540627	0.151779	0.0499164	0.240228	0.0471568
FBgn0001257	1197.74	1167.34	752.15	565.256	1401.11	890.219	0.099611	0.75575	0.99972	ImpL2	3L	-	4224006	4236147	2667	protein_coding	NA	1546	930	766	733	1215	774	51.5103	38.5652	29.7259	28.0648	44.776	27.9963
FBgn0001258	1165.2	1528.84	1465.02	677.845	1651.35	2370.47	-0.13151	0.69865	0.99972	ImpL3	3L	-	6259105	6262694	1942	protein_coding	NA	1504	1218	1492	879	1432	2061	52.8548	53.2736	61.07	35.4976	55.6628	78.6302
FBgn0001259	9.29682	16.3177	24.548	9.25385	23.0635	10.3514	0.1276	0.74343	0.99972	in	3L	+	20367198	20370259	3062	protein_coding	NA	12	13	25	12	20	9	0.201216	0.271302	0.488252	0.231226	0.370934	0.163832
FBgn0001263	6.97261	7.53123	11.783	0	9.2254	6.90092	0.22064	0.53932	0.99972	inaD	2R	-	22855688	22858794	2331	protein_coding	NA	9	6	12	0	8	6	0.199781	0.165764	0.310252	0	0.19642	0.14459
FBgn0001269	8.52208	8.78644	5.89151	14.6519	6.91905	16.1021	-0.36093	0.35565	0.99972	inv	2R	+	11474465	11509695	5919	protein_coding	NA	11	7	6	19	6	14	0.162293	0.128539	0.103105	0.322133	0.0979138	0.224239
FBgn0001276	144.875	106.692	146.306	222.092	92.254	152.97	-0.18255	0.57319	0.99972	ix	2R	-	11359437	11360163	727	protein_coding	NA	187	85	149	288	80	133	13.2067	7.47135	12.2563	23.3732	6.24924	10.1972
FBgn0001280	553.935	492.04	554.784	651.625	513.163	510.668	-0.060168	0.7922	0.99972	janA	3R	-	30038622	30039533	740	protein_coding	NA	715	392	565	845	445	444	54.4669	37.1656	50.13	73.9703	37.4949	36.7185
FBgn0001281	0	1.25521	4.9096	1.54231	0	0	0.14465	0.50474	NA	janB	3R	-	30037984	30038728	569	protein_coding	NA	0	1	5	2	0	0	0	0.112306	0.525493	0.207386	0	0
FBgn0001285	7.74735	5.02082	9.81919	31.6173	17.2976	10.3514	-0.72076	0.064908	0.99029	Jon44E	2R	+	8691448	8692844	1397	protein_coding	NA	10	4	10	41	15	9	0.446855	0.222461	0.520462	2.10535	0.741384	0.4366
FBgn0001291	1233.38	2437.61	1444.4	969.341	2140.29	1602.16	0.092675	0.77405	0.99972	Jra	2R	+	10096480	10098556	1642	protein_coding	NA	1592	1942	1471	1257	1856	1393	53.1464	80.6878	57.196	48.2214	68.532	50.4843
FBgn0001296	1207.04	1572.77	1062.44	527.47	1235.05	832.711	0.45668	0.13947	0.99972	kar	3R	-	12682186	12689367	2678	protein_coding	NA	1558	1253	1082	684	1071	724	35.5684	35.6022	28.7705	17.9443	27.0441	17.9437
FBgn0001297	2124.32	3889.88	2604.05	1784.45	4139.9	2600.5	0.012366	0.96918	0.99972	kay	3R	+	29765995	29794113	7789	protein_coding	NA	2742	3099	2652	2314	3590	2261	36.3972	51.1976	41.0012	35.297	52.7084	32.5819
FBgn0001301	893.269	722.998	811.065	972.426	520.082	587.728	0.18736	0.50766	0.99972	kel	2L	-	18129884	18138083	5476	protein_coding	NA	1153	576	826	1261	451	511	10.8107	6.72162	9.0204	13.5866	4.67719	5.20139
FBgn0001308	2655.02	2890.74	2560.85	3274.32	3156.24	3070.91	-0.21408	0.27051	0.99972	Khc	2R	-	16266960	16271971	3718	protein_coding	NA	3427	2303	2608	4246	2737	2670	47.3251	39.5822	41.9476	67.38	41.8059	40.028
FBgn0001311	8.52208	10.0416	17.6745	5.39808	10.3786	6.90092	0.34248	0.38092	0.99972	kkv	3R	-	5378093	5392866	5701	protein_coding	NA	11	8	18	7	9	6	0.10265	0.0929147	0.195641	0.0750651	0.0928953	0.0607844
FBgn0001316	2238.98	1764.82	2046.32	2899.54	1781.66	1641.27	-0.054583	0.84246	0.99972	klar	3L	-	434083	540614	11717	protein_coding	NA	2890	1406	2084	3760	1545	1427	23.6882	14.3433	19.8955	35.4158	14.0071	12.698
FBgn0001319	99.1661	128.031	39.2768	51.6673	199.499	106.964	-0.26485	0.48434	0.99972	kn	2R	-	14772650	14807061	4391	protein_coding	NA	128	102	40	67	173	93	1.92051	1.90474	0.699019	1.1552	2.87103	1.51483
FBgn0001320	41.8357	64.0155	44.1864	47.8116	115.318	110.415	-0.62891	0.070881	0.99972	kni	3L	-	20692330	20695378	2215	protein_coding	NA	54	51	45	62	100	96	1.38213	1.62463	1.3415	1.82357	2.83101	2.66748
FBgn0001321	8.52208	31.3801	4.9096	12.3385	10.3786	4.60061	0.28378	0.46192	0.99972	knk	3R	-	10122365	10125664	2674	protein_coding	NA	11	25	5	16	9	4	0.211212	0.597439	0.11182	0.353036	0.191141	0.0833797
FBgn0001323	61.2041	87.8644	73.6439	56.2943	221.41	128.817	-0.59461	0.10087	0.99972	knrl	3L	-	20597141	20620659	3909	protein_coding	NA	79	70	75	73	192	112	1.18705	1.30909	1.31258	1.26049	3.19101	1.82698
FBgn0001324	623.662	695.384	723.674	862.922	597.345	757.951	-0.10762	0.65145	0.99972	kto	3L	+	19836614	19844944	7776	protein_coding	NA	805	554	737	1119	518	659	8.7345	7.48135	9.3139	13.9523	6.21666	7.76251
FBgn0001325	3.09894	5.02082	0	34.7019	0	1.15015	-0.32531	NA	NA	Kr	2R	+	25226611	25231394	4411	protein_coding	NA	4	4	0	45	0	1	0.0591176	0.0735775	0	0.764264	0	0.0160447
FBgn0001330	390.466	273.635	376.075	391.746	166.057	230.031	0.31599	0.31931	0.99972	kz	X	-	2237858	2242035	3927	protein_coding	NA	504	218	383	508	144	200	6.7494	3.63345	5.97387	7.81758	2.13296	2.90763
FBgn0001332	1783.44	1364.41	1717.38	1672.63	1167.01	1392.84	0.17908	0.46166	0.99972	L	2R	+	14481187	14497312	2632	protein_coding	NA	2302	1087	1749	2169	1012	1211	44.9062	26.3912	39.7386	48.6222	21.8357	25.646
FBgn0001341	288.976	168.198	294.576	427.991	103.786	181.724	0.049877	0.89136	0.99972	l(1)1Bi	X	+	629773	633633	3680	protein_coding	NA	373	134	300	555	90	158	5.20413	2.32687	4.87509	8.89828	1.38889	2.39316
FBgn0001404	1734.63	2662.29	1932.42	2287.24	3625.58	2577.49	-0.36376	0.18237	0.99972	egh	X	+	2588503	2599111	4662	protein_coding	NA	2239	2121	1968	2966	3144	2241	35.0376	41.3094	35.8697	53.3366	54.4187	38.0713
FBgn0001491	342.433	327.609	377.057	434.16	360.944	335.845	-0.10126	0.66383	0.99972	l(1)10Bb	X	-	11324294	11325308	934	protein_coding	NA	442	261	384	563	313	292	24.2975	17.857	24.5863	35.5649	19.0313	17.426
FBgn0001565	1578.91	1688.25	2067.92	1934.06	1815.1	1803.44	-0.05297	0.80697	0.99972	Hlc	X	-	21385518	21387946	2116	protein_coding	NA	2038	1345	2106	2508	1574	1568	51.2933	42.1315	61.7358	72.5367	43.8174	42.8428
FBgn0001612	478.786	234.723	434.99	859.066	242.167	287.538	-0.18575	0.61164	0.99972	Grip91	X	-	13736570	13744683	3571	protein_coding	NA	618	187	443	1114	210	250	8.88557	3.34631	7.41862	18.4059	3.33965	3.90222
FBgn0001624	1375.93	1225.08	1352.1	1553.1	1446.08	1140.95	-0.060718	0.78761	0.99972	dlg1	X	+	11369665	11409776	11505	protein_coding	NA	1776	976	1377	2014	1254	992	20.5885	14.0818	18.5925	26.8296	16.0792	12.4844
FBgn0001941	1287.61	1453.53	1231.33	1543.85	1644.43	1285.87	-0.1571	0.47441	0.99972	ifc	2L	+	5986348	5988854	2201	protein_coding	NA	1662	1158	1254	2002	1426	1118	49.6123	43.0224	43.5992	68.6746	47.0829	36.2306
FBgn0001942	18998	23505	22069.6	17717.3	25293.7	25245.9	-0.071643	0.76487	0.99972	eIF-4a	2L	+	5981764	5985909	2480	protein_coding	NA	24522	18726	22476	22975	21934	21950	686.13	652.114	732.474	738.72	678.818	666.746
FBgn0001961	1391.42	2195.35	1551.43	1523.8	2387.07	2202.54	-0.21463	0.43464	0.99972	Arpc1	2L	-	13827941	13829741	1732	protein_coding	NA	1796	1749	1580	1976	2070	1915	54.275	65.7826	55.6125	68.6206	69.1909	62.8257
FBgn0001965	761.564	608.775	742.331	884.514	493.559	584.278	0.090253	0.74362	0.99972	Sos	2L	+	13813816	13819824	5635	protein_coding	NA	983	485	756	1147	428	508	8.95667	5.5	8.023	12.0096	4.31342	5.02495
FBgn0001970	1.54947	1.25521	0	1.54231	0	0	0.048092	0.79865	NA	Pgant35A	2L	+	14359252	14361411	2160	protein_coding	NA	2	1	0	2	0	0	0.0475404	0.0295843	0	0.0546307	0	0
FBgn0001974	348.631	230.958	314.214	502.021	226.022	267.986	-0.12446	0.69542	0.99972	l(2)35Bd	2L	+	15009939	15011764	1769	protein_coding	NA	450	184	320	651	196	233	13.0609	6.64668	10.8176	21.7127	6.29217	7.34158
FBgn0001977	333.911	445.598	364.292	410.254	358.637	435.908	-0.068932	0.7726	0.99972	CIAPIN1	2L	-	15036293	15038861	2358	protein_coding	NA	431	355	371	532	311	379	9.3847	9.62054	9.40891	13.3115	7.49011	8.95895
FBgn0001978	2047.62	1471.1	2002.13	2780.01	1418.41	1706.83	-0.081107	0.78064	0.99972	stc	2L	+	15113480	15118069	4145	protein_coding	NA	2643	1172	2039	3605	1230	1484	32.8654	18.1383	29.5312	51.5135	16.9173	20.0332
FBgn0001981	6.97261	3.76562	5.89151	28.5327	13.8381	8.05107	-0.74657	0.055843	0.94468	esg	2L	+	15333866	15336138	2273	protein_coding	NA	9	3	6	37	12	7	0.203297	0.0843406	0.157856	0.960424	0.299815	0.171657
FBgn0001986	467.94	473.212	455.61	720.258	334.421	409.455	-0.057512	0.84719	0.99972	l(2)35Df	2L	+	15752263	15755900	3585	protein_coding	NA	604	377	464	934	290	356	8.65037	6.71997	7.73994	15.3716	4.59389	5.53506
FBgn0001987	319.966	438.067	336.798	242.914	479.721	289.839	0.093216	0.75489	0.99972	Gli	2L	-	15756002	15762758	4468	protein_coding	NA	413	349	343	315	416	252	5.11455	5.37912	4.94736	4.48272	5.69818	3.38792
FBgn0001989	1213.23	1655.62	1310.86	1053.4	1537.18	1581.46	0.0023917	0.99259	0.99972	l(2)35Di	2L	-	15749319	15751078	992	protein_coding	NA	1566	1319	1335	1366	1333	1375	94.482	99.0444	93.8125	94.7069	88.9554	90.0606
FBgn0001990	337.784	269.869	331.889	588.391	214.491	295.589	-0.1749	0.59507	0.99972	wek	2L	-	15766133	15768349	2033	protein_coding	NA	436	215	338	763	186	257	12.0225	7.37859	10.8554	24.1772	5.6729	7.69334
FBgn0001991	331.587	487.02	373.129	164.256	630.787	312.842	0.075835	0.82995	0.99972	Ca-alpha1D	2L	+	16165831	16190540	10481	protein_coding	NA	428	388	380	213	547	272	2.55584	2.88369	2.64299	1.46165	3.61295	1.76333
FBgn0001992	10.0716	0	2.94576	3.08462	6.91905	11.5015	-0.18072	0.6036	0.99972	Cyp303a1	2L	+	16294183	16296969	2787	protein_coding	NA	13	0	3	4	6	10	0.290077	0	0.0779675	0.102566	0.148083	0.24224
FBgn0001994	1317.05	950.19	1248.02	1688.83	764.555	930.474	0.044157	0.88543	0.99972	crp	2L	-	16263556	16287730	4402	protein_coding	NA	1700	757	1271	2190	663	809	21.986	12.1849	19.1454	32.5472	9.48407	11.3585
FBgn0001995	380.395	307.525	329.925	465.006	269.843	336.995	-0.06499	0.81168	0.99972	mRpL4	2L	-	16328059	16329132	1012	protein_coding	NA	491	245	336	603	234	293	24.9108	15.4704	19.8549	35.1558	13.1313	16.138
FBgn0002021	277.355	302.504	276.901	365.527	279.068	249.583	-0.05719	0.81952	0.99972	l(2)37Bb	2L	-	19049843	19051612	1708	protein_coding	NA	358	241	282	474	242	217	10.7617	9.01663	9.87348	16.3739	8.04636	7.08164
FBgn0002022	904.116	1090.77	921.04	923.843	982.505	991.432	0.0079229	0.96992	0.99972	Catsup	2L	+	19041862	19043614	1698	protein_coding	NA	1167	869	938	1198	852	862	35.2874	32.7037	33.035	41.6274	28.4953	28.2964
FBgn0002023	10.8463	7.53123	6.87343	3.85577	2.30635	1.15015	0.63109	0.095345	0.99972	Lim3	2L	-	19079256	19108427	4281	protein_coding	NA	14	6	7	5	2	1	0.25681	0.136982	0.149556	0.105397	0.0405788	0.019914
FBgn0002031	1866.34	1782.39	1895.1	2188.54	1484.14	1842.55	0.0064337	0.97788	0.99972	l(2)37Cc	2L	-	19121345	19123869	2119	protein_coding	NA	2409	1420	1930	2838	1287	1602	79.3882	58.2419	74.0796	107.475	46.9119	57.3135
FBgn0002036	176.64	169.453	156.125	190.475	198.346	186.325	-0.17523	0.45765	0.99972	CG10561	2L	+	19114401	19116570	2052	protein_coding	NA	228	135	159	247	172	162	5.70485	4.20408	4.63371	7.10199	4.76018	4.40047
FBgn0002044	1851.62	1252.69	1650.61	2453.81	1112.81	1365.23	-0.042803	0.88943	0.99972	swm	2L	+	19493251	19497978	4249	protein_coding	NA	2390	998	1681	3182	965	1187	30.217	15.7041	24.7539	46.2304	13.4948	16.2922
FBgn0002069	497.38	617.561	429.099	576.052	493.559	450.86	0.017997	0.94204	0.99972	Aats-asp	2R	+	12877004	12883168	2266	protein_coding	NA	642	492	437	747	428	392	16.1582	15.4117	12.8103	21.6048	11.9148	10.7107
FBgn0002121	2940.12	2189.08	2354.64	3966.82	2377.85	2373.92	-0.18845	0.49371	0.99972	l(2)gl	2L	-	9839	21376	5986	protein_coding	NA	3795	1744	2398	5144	2062	2064	36.9382	21.1271	27.1854	57.5359	22.1992	21.8097
FBgn0002174	890.17	901.237	779.644	826.677	788.772	861.465	0.049655	0.81003	0.99972	l(2)tid	2R	+	23706913	23709026	2070	protein_coding	NA	1149	718	794	1072	684	749	33.3111	25.9072	26.8109	35.7139	21.9336	23.5735
FBgn0002183	1856.26	1056.88	1565.18	2933.47	786.465	1353.73	-0.12857	0.71614	0.99972	dre4	3L	-	1871574	1876312	3690	protein_coding	NA	2396	842	1594	3804	682	1177	33.871	14.8143	26.2453	61.7953	10.6638	18.0631
FBgn0002283	548.512	364.01	484.086	834.389	287.141	424.407	-0.11166	0.739	0.99972	l(3)73Ah	3L	+	16588475	16590132	1404	protein_coding	NA	708	290	493	1082	249	369	26.6701	13.5962	21.6302	46.8373	10.3747	15.0901
FBgn0002284	1876.41	2039.71	2011.95	2044.33	2485.09	2265.8	-0.1823	0.37297	0.99972	Prosbeta6	3L	-	16609400	16610418	944	protein_coding	NA	2422	1625	2049	2651	2155	1970	131.731	110.001	129.801	165.691	129.642	116.32
FBgn0002306	140.227	160.666	182.637	134.181	283.681	273.737	-0.41197	0.1861	0.99972	sas	3R	+	7162808	7183702	6236	protein_coding	NA	181	128	186	174	246	238	1.68722	1.48502	2.01943	1.86387	2.53637	2.40849
FBgn0002354	128.606	128.031	117.83	132.639	151.066	184.025	-0.27705	0.29034	0.99972	l(3)87Df	3R	+	13030913	13031598	551	protein_coding	NA	166	102	120	172	131	160	15.4683	11.8294	13.0238	18.4178	13.5018	16.1856
FBgn0002413	2612.41	1674.44	2681.62	3925.18	1353.83	2156.54	-0.071369	0.83044	0.99972	dco	3R	-	31054085	31061210	4783	protein_coding	NA	3372	1334	2731	5090	1174	1875	49.9512	24.5947	47.1197	86.6463	19.2359	30.1533
FBgn0002431	3006.75	2796.6	2915.32	3329.84	2380.15	2449.83	0.086201	0.70759	0.99972	hyd	3R	-	9714623	9725615	9083	protein_coding	NA	3881	2228	2969	4318	2064	2130	21.9455	15.6799	19.5539	28.058	12.9091	13.0754
FBgn0002441	1121.04	1174.87	1078.15	1443.6	985.965	1196.16	-0.094149	0.68694	0.99972	l(3)mbt	3R	-	27266326	27273273	5398	protein_coding	NA	1447	936	1098	1872	855	1040	13.7633	11.0805	12.1641	20.4613	8.99508	10.739
FBgn0002466	445.473	244.765	443.827	1044.14	152.219	269.136	-0.21951	0.56774	0.99972	sti	3L	-	12507998	12514815	6084	protein_coding	NA	575	195	452	1354	132	234	4.85729	2.05016	4.4472	13.1437	1.23335	2.14594
FBgn0002521	787.905	588.691	759.024	1252.35	541.992	661.338	-0.16197	0.60361	0.99972	pho	4	-	1172469	1181628	2381	protein_coding	NA	1017	469	773	1624	470	575	23.0029	13.2027	20.364	42.2105	11.7583	14.119
FBgn0002522	4.64841	0	1.96384	4.62693	5.76588	3.45046	-0.24948	0.46255	0.99972	lab	3R	-	6661427	6678590	3046	protein_coding	NA	6	0	2	6	5	3	0.141248	0	0.0548382	0.162314	0.130193	0.0766703
FBgn0002524	1069.91	1196.21	1139.03	1322.53	1342.3	1170.86	-0.15957	0.434	0.99972	lace	2L	+	15499127	15505018	2991	protein_coding	NA	1381	953	1160	1715	1164	1018	25.524	21.9218	24.9709	36.4244	23.7954	20.4257
FBgn0002525	1473.55	866.092	1299.08	2412.17	733.419	931.624	-0.11814	0.73691	0.99972	Lam	2L	+	5542480	5546642	3737	protein_coding	NA	1902	690	1323	3128	636	810	29.9098	13.5046	24.2318	56.5255	11.0623	13.8281
FBgn0002526	2875.04	4973.12	2642.34	2637.35	6957.1	3817.36	-0.26815	0.4241	0.99972	LanA	3L	-	6203831	6218022	11690	protein_coding	NA	3711	3962	2691	3420	6033	3319	16.2991	21.6578	13.766	17.2613	29.3083	15.8254
FBgn0002531	1.54947	0	2.94576	0	2.30635	2.30031	0.0037884	0.98819	0.99972	Lcp1	2R	-	8430115	8431243	1065	protein_coding	NA	2	0	3	0	2	2	0.127721	0	0.223138	0	0.141269	0.138655
FBgn0002533	1.54947	2.51041	0	0	0	0	0.12874	0.41726	NA	Lcp2	2R	-	8433797	8434785	927	protein_coding	NA	2	2	0	0	0	0	0.139901	0.17412	0	0	0	0
FBgn0002534	1.54947	5.02082	0.981919	0	0	0	0.29326	0.19909	NA	Lcp3	2R	+	8435310	8436095	730	protein_coding	NA	2	4	1	0	0	0	0.165092	0.410946	0.0961432	0	0	0
FBgn0002535	0	6.27603	0	0	3.45953	0	0.05134	0.7859	0.99972	Lcp4	2R	+	8437647	8438495	792	protein_coding	NA	0	5	0	0	3	0	0	0.484107	0	0	0.258136	0
FBgn0002542	1069.91	579.905	951.48	1870.05	401.305	757.951	-0.14769	0.68762	0.99972	lds	3R	+	7920431	7924491	3543	protein_coding	NA	1381	462	969	2425	348	659	20.0129	8.3327	16.3554	40.3832	5.57802	10.3675
FBgn0002543	93.7429	94.1404	71.6801	89.4539	185.661	231.181	-0.73026	0.028437	0.6759	lea	2L	-	1380086	1420453	6206	protein_coding	NA	121	75	73	116	161	201	1.00106	0.772261	0.703429	1.10283	1.47328	1.80529
FBgn0002552	556.26	415.473	537.11	877.574	232.941	431.308	-0.023379	0.94668	0.99972	lin	2R	+	8914524	8918234	3654	protein_coding	NA	718	331	547	1138	202	375	10.0889	5.78861	8.95216	18.3753	3.13946	5.72037
FBgn0002562	117.76	263.593	65.7886	1457.48	1965.01	1495.2	-2.4563	2.8563e-12	1.3437e-09	Lsp1alpha	X	+	12490291	12492982	2625	protein_coding	NA	152	210	67	1890	1704	1300	2.97304	5.11216	1.52635	42.4808	36.8648	27.6042
FBgn0002563	2816.16	3769.38	1455.2	27286.5	45706.1	39283.5	-2.9631	3.3351e-20	2.8964e-17	Lsp1beta	2L	+	898500	901316	2749	protein_coding	NA	3635	3003	1482	35384	39635	34155	69.7177	71.6839	33.1062	779.865	840.819	711.16
FBgn0002564	7.74735	6.27603	3.92768	12.3385	46.127	11.5015	-0.88489	0.02332	0.59127	Lsp1gamma	3L	+	66430	68995	2501	protein_coding	NA	10	5	4	16	40	10	0.205293	0.127753	0.0956435	0.377457	0.908277	0.222868
FBgn0002565	484.984	599.988	314.214	6035.82	9296.9	9616.43	-3.4397	8.8391e-32	1.9959e-28	Lsp2	3L	+	12129393	12131869	2477	protein_coding	NA	626	478	320	7827	8062	8361	13.4425	12.7751	8.00349	193.142	191.485	194.913
FBgn0002566	779.383	754.378	847.396	869.862	795.691	719.996	-0.0028223	0.98939	0.99972	lt	2L	+	22924795	22943135	5368	protein_coding	NA	1006	601	863	1128	690	626	13.5179	10.0511	13.5065	17.4178	10.2552	9.13185
FBgn0002567	980.814	901.237	1068.33	1447.46	914.468	954.627	-0.14836	0.56526	0.99972	ltd	2R	-	9177864	9186342	4081	protein_coding	NA	1266	718	1088	1877	793	830	34.575	24.4051	34.6083	58.907	23.9545	24.6083
FBgn0002569	122.408	20.0833	65.7886	119.529	41.5143	49.4566	-0.0076546	0.98425	0.99972	Mal-A2	2R	+	8453627	8455782	2036	protein_coding	NA	158	16	67	155	36	43	3.98443	0.502177	1.96791	4.49174	1.00415	1.17721
FBgn0002570	173.541	2.51041	1354.07	2124.53	4.6127	1.15015	-0.039807	0.85431	0.99972	Mal-A1	2R	-	8449664	8451904	1826	protein_coding	NA	224	2	1379	2755	4	1	6.29846	0.0699913	45.1619	89.0187	0.124403	0.0305254
FBgn0002571	79.7977	0	11.783	17.7365	12.6849	9.20123	0.35163	0.32412	0.99972	Mal-A3	2R	-	8455909	8457892	1795	protein_coding	NA	103	0	12	23	11	8	2.94618	0	0.399784	0.756004	0.348017	0.24842
FBgn0002576	32.5389	50.2082	13.7469	14.6519	39.208	13.8018	0.28373	0.46529	0.99972	lz	X	+	9284649	9303636	3468	protein_coding	NA	42	40	14	19	34	12	0.656049	0.777634	0.254705	0.341047	0.587423	0.20349
FBgn0002577	13.1705	17.5729	13.7469	13.1096	10.3786	2.30031	0.36977	0.34401	0.99972	m	X	+	11754273	11769508	3405	protein_coding	NA	17	14	14	17	9	2	0.256341	0.26274	0.245878	0.294573	0.150106	0.0327397
FBgn0002579	13052	20939.3	19339.9	9485.97	16906.7	19354.8	0.18138	0.54621	0.99972	RpL36	X	-	628338	629483	686	protein_coding	NA	16847	16682	19696	12301	14661	16828	1575.57	1941.74	2145.43	1321.99	1516.57	1708.53
FBgn0002590	14558	21721.3	17605.8	8168.84	16609.2	18771.7	0.24815	0.42061	0.99972	RpS5a	X	-	17143588	17148264	1386	protein_coding	NA	18791	17305	17930	10593	14403	16321	949.605	1088.41	1055.35	615.157	805.065	895.395
FBgn0002592	17.8189	11.2968	4.9096	2.31346	6.91905	4.60061	0.53708	0.16272	0.99972	E(spl)m2-BFM	3R	-	26016514	26017470	957	protein_coding	NA	23	9	5	3	6	4	1.23396	0.60096	0.31244	0.184957	0.35605	0.232975
FBgn0002593	24707.8	34296	29121.8	18060.4	29102.7	31599.3	0.13911	0.6098	0.99972	RpLP1	2L	+	419952	420864	768	protein_coding	NA	31892	27323	29658	23420	25237	27474	2390.44	2548.9	2589.17	2017.24	2092.28	2235.59
FBgn0002607	25144	33947	30758.6	19433.1	30147.5	34142.3	0.087828	0.74471	0.99972	RpL19	2R	-	24967877	24969547	1361	protein_coding	NA	32455	27045	31325	25200	26143	29685	1575.01	1633.49	1770.58	1405.32	1403.27	1563.91
FBgn0002609	88.3198	61.5051	63.8247	47.0404	61.1183	41.4055	0.4151	0.18781	0.99972	E(spl)m3-HLH	3R	+	26021823	26023127	1305	protein_coding	NA	114	49	65	61	53	36	4.48519	2.39939	2.9786	2.75791	2.30641	1.53764
FBgn0002622	19713.9	27668.5	25398.3	16886	25397.5	27449.6	0.053579	0.8395	0.99972	RpS3	3R	+	23358812	23360207	1133	protein_coding	NA	25446	22043	25866	21897	22024	23866	1314.38	1417.1	1556.15	1299.75	1258.29	1338.3
FBgn0002626	16037	21932.2	19796.5	11831.8	19534.8	21626.3	0.10613	0.70151	0.99972	RpL32	3R	-	30045229	30046161	796	protein_coding	NA	20700	17473	20161	15343	16940	18803	1637.62	1720.43	1857.7	1394.85	1482.32	1614.89
FBgn0002632	0.774735	0	0	0	0	0	0.032879	0.81996	NA	E(spl)m6-BFM	3R	+	26032911	26034047	1137	protein_coding	NA	1	0	0	0	0	0	0.0451571	0	0	0	0	0
FBgn0002633	3.87367	0	6.87343	2.31346	4.6127	2.30031	0.059863	0.85633	0.99972	E(spl)m7-HLH	3R	+	26037038	26038019	982	protein_coding	NA	5	0	7	3	4	2	0.261424	0	0.426281	0.180248	0.231324	0.113522
FBgn0002638	1851.62	999.143	1758.62	3409.27	810.682	1463	-0.2076	0.56689	0.99972	Rcc1	3L	-	5930262	5932773	2365	protein_coding	NA	2390	796	1791	4421	703	1272	55.8286	23.142	48.7278	118.673	18.1635	32.2568
FBgn0002641	377.296	410.452	417.316	609.212	300.979	400.253	-0.10321	0.72013	0.99972	mal	X	+	20429675	20433210	3209	protein_coding	NA	487	327	425	790	261	348	8.39354	7.01443	8.53154	15.6465	4.97556	6.51134
FBgn0002643	923.484	961.487	923.004	906.106	976.739	818.909	0.051305	0.80303	0.99972	mam	2R	+	13991203	14060356	8869	protein_coding	NA	1192	766	940	1175	847	712	10.3189	8.25307	9.47783	11.6888	8.11012	6.69135
FBgn0002645	3229.1	2925.88	3349.33	3386.91	2127.61	2204.84	0.2634	0.30223	0.99972	Map205	3R	-	32055279	32068441	6046	protein_coding	NA	4168	2331	3411	4392	1845	1917	43.399	30.208	41.3672	52.5518	21.2487	21.6695
FBgn0002673	740.647	331.374	712.873	1479.07	231.788	580.828	-0.2217	0.56011	0.99972	twe	2L	-	16259414	16261877	2379	protein_coding	NA	956	264	726	1918	201	505	23.5417	8.0912	20.8228	54.2754	5.47472	13.5004
FBgn0002707	289.751	163.177	281.811	474.26	190.274	227.73	-0.21047	0.53477	0.99972	mei-9	X	-	4314230	4318801	3606	protein_coding	NA	374	130	287	615	165	198	5.41069	2.34073	4.83598	10.2242	2.64028	3.10972
FBgn0002709	7.74735	6.27603	2.94576	3.85577	9.2254	4.60061	-0.014167	0.9703	0.99972	mei-218	X	-	17135985	17142996	6316	protein_coding	NA	10	5	3	5	8	4	0.104357	0.0649411	0.0364641	0.0599605	0.0923415	0.0453165
FBgn0002715	157.271	94.1404	145.324	282.242	81.8754	129.967	-0.22326	0.53295	0.99972	mei-S332	2R	+	22122101	22124566	1703	protein_coding	NA	203	75	148	366	71	113	6.72871	3.09403	5.71372	13.9409	2.60303	4.0662
FBgn0002716	17.8189	27.6145	25.5299	21.5923	23.0635	18.4025	0.10944	0.76238	0.99972	mei-W68	2R	+	19456170	19459523	2300	protein_coding	NA	23	22	26	28	20	16	0.513437	0.611237	0.676012	0.718275	0.493826	0.387752
FBgn0002719	19771.2	22851	16796.7	16195	26459.6	40948.9	-0.39592	0.20222	0.99972	Men	3R	-	12713103	12722442	3074	protein_coding	NA	25520	18205	17106	21001	22945	35603	489.097	434.243	381.843	462.517	486.393	740.757
FBgn0002723	346.306	337.65	333.853	341.621	238.707	263.385	0.23862	0.3302	0.99972	Met	X	+	11616124	11621280	5088	protein_coding	NA	447	269	340	443	207	229	5.1901	3.8873	4.598	5.91079	2.65842	2.88655
FBgn0002732	9.29682	17.5729	7.85535	13.1096	5.76588	11.5015	0.082449	0.83292	0.99972	E(spl)malpha-BFM	3R	+	26010893	26011568	676	protein_coding	NA	12	14	8	17	5	10	0.911426	1.32342	0.707705	1.48376	0.420044	0.824546
FBgn0002733	361.801	380.327	394.731	269.904	441.666	270.286	0.18282	0.50072	0.99972	E(spl)mbeta-HLH	3R	-	26005046	26006023	978	protein_coding	NA	467	303	402	350	383	235	24.5169	19.7979	24.5808	21.1149	22.2398	13.3934
FBgn0002734	0.774735	1.25521	0	0	0	0	0.066928	0.64315	NA	E(spl)mdelta-HLH	3R	+	25997621	25998633	1013	protein_coding	NA	1	1	0	0	0	0	0.0506848	0.063082	0	0	0	0
FBgn0002735	0.774735	0	0	0	0	0	0.032879	0.81996	NA	E(spl)mgamma-HLH	3R	+	25999851	26000761	911	protein_coding	NA	1	0	0	0	0	0	0.0563597	0	0	0	0	0
FBgn0002736	509.001	484.509	506.67	710.233	374.782	463.512	-0.040269	0.8851	0.99972	mago	2R	+	21128577	21129737	1103	protein_coding	NA	657	386	516	921	325	403	30.5828	22.3628	27.9758	49.2657	16.7332	20.3653
FBgn0002772	298.273	376.562	338.762	202.814	1328.46	450.86	-0.60859	0.10674	0.99972	Mlc1	3R	-	27657078	27660177	1414	protein_coding	NA	385	300	345	263	1152	392	18.3882	17.8331	19.192	14.4347	60.8577	20.3254
FBgn0002773	1300.78	2248.07	1534.74	922.301	4935.59	1928.81	-0.40429	0.27574	0.99972	Mlc2	3R	-	30171438	30174551	2286	protein_coding	NA	1679	1791	1563	1196	4280	1677	37.7104	50.065	40.8876	30.8685	106.326	40.8901
FBgn0002774	642.255	463.171	557.73	570.654	544.299	542.872	0.005276	0.98174	0.99972	mle	2R	-	5974857	5980778	4641	protein_coding	NA	829	369	568	740	472	472	10.5278	5.83227	8.40144	10.7991	6.62995	6.50729
FBgn0002775	363.351	251.041	355.455	630.804	216.797	235.781	-0.1176	0.73499	0.99972	msl-3	3L	-	7123213	7125533	1970	protein_coding	NA	469	200	362	818	188	205	12.2234	6.48752	10.9888	24.499	5.41955	5.80028
FBgn0002778	1842.32	2170.25	2002.13	1431.26	1594.84	2411.87	0.12686	0.62797	0.99972	mnd	3L	+	14985100	14991667	2546	protein_coding	NA	2378	1729	2039	1856	1383	2097	52.9927	47.9543	52.9229	47.5287	34.0888	50.7315
FBgn0002780	3941.08	2507.9	3565.35	5060.31	2355.94	2707.46	-0.012699	0.96733	0.99972	mod	3R	+	32052060	32054974	2287	protein_coding	NA	5087	1998	3631	6562	2043	2354	123.142	60.1963	102.375	182.539	54.7015	61.8625
FBgn0002783	1985.65	1322.99	1876.45	3363.78	1028.63	1430.79	-0.12327	0.72088	0.99972	mor	3R	-	15968134	15972913	3983	protein_coding	NA	2563	1054	1911	4362	892	1244	33.8549	17.3277	29.4005	66.2112	13.0323	17.8389
FBgn0002787	1707.52	1778.63	1691.85	1745.89	1531.42	1667.72	0.061611	0.75445	0.99972	Rpn8	2R	+	24400028	24404527	1532	protein_coding	NA	2204	1417	1723	2264	1328	1450	77.4018	61.9352	70.4769	91.3671	51.5849	55.2818
FBgn0002789	612.815	756.889	578.35	330.825	2035.35	799.357	-0.45359	0.22424	0.99972	Mp20	2R	+	13246670	13248880	948	protein_coding	NA	791	603	589	429	1765	695	51.6703	49.0241	44.8128	32.2029	127.525	49.286
FBgn0002791	325.389	230.958	332.871	472.718	191.427	261.085	-0.045885	0.88725	0.99972	mr	2R	+	23972431	23975408	2555	protein_coding	NA	420	184	339	613	166	227	8.44005	4.60195	7.93447	14.1557	3.68968	4.95218
FBgn0002842	3.09894	3.76562	0.981919	0	1.15318	0	0.30681	0.24954	0.99972	sa	3L	-	21405425	21406738	956	protein_coding	NA	4	3	1	0	1	0	0.214827	0.200529	0.0625534	0	0.0594038	0
FBgn0002862	0	17.5729	3.92768	9.25385	26.523	13.8018	-0.36561	0.30951	0.99972	Mst87F	3R	-	13827151	13828008	623	protein_coding	NA	0	14	4	12	23	12	0	1.85994	0.497306	1.47196	2.71553	1.39059
FBgn0002868	147269	209720	193957	13974.1	45055.7	58964.9	1.5783	8.0165e-06	0.0015878	MtnA	3R	-	9783407	9784370	700	protein_coding	NA	190089	167080	197528	18121	39071	51267	18951.2	20731.6	22936.7	2076.04	4308.43	5548.71
FBgn0002869	20.1431	26.3593	12.7649	40.8712	93.4072	17.2523	-0.75586	0.051315	0.90101	MtnB	3R	-	20503102	20503746	584	protein_coding	NA	26	21	13	53	81	15	3.2719	3.28908	1.90543	7.66437	11.2745	2.04924
FBgn0002872	731.35	312.546	578.35	1298.62	212.184	472.713	-0.17893	0.63789	0.99972	mu2	3L	-	1942734	1947475	4117	protein_coding	NA	944	249	589	1684	184	411	11.8505	3.89037	8.61194	24.2929	2.55486	5.60119
FBgn0002873	1544.05	532.207	1099.75	2316.55	300.979	835.011	-0.070006	0.856	0.99972	mud	X	+	14247732	14258595	8895	protein_coding	NA	1993	424	1120	3004	261	726	13.539	3.58487	8.86176	23.4506	1.96113	5.35416
FBgn0002878	341.658	259.828	438.918	545.977	103.786	209.328	0.17863	0.63157	0.99972	mus101	X	+	13722246	13727113	4868	protein_coding	NA	441	207	447	708	90	182	4.65131	2.71728	5.49118	8.58111	1.04994	2.08393
FBgn0002887	450.121	291.208	343.672	586.077	232.941	302.49	-0.03775	0.90824	0.99972	mus201	2L	+	8438169	8442342	3950	protein_coding	NA	581	232	350	760	202	263	7.65281	3.8033	5.36952	11.5036	2.94294	3.76076
FBgn0002891	340.109	232.213	289.666	382.493	166.057	178.274	0.18917	0.56189	0.99972	mus205	2R	+	7793625	7801044	6750	protein_coding	NA	439	185	295	496	144	155	3.33924	1.75139	2.61353	4.33549	1.21152	1.27994
FBgn0002899	330.812	148.114	251.371	579.137	175.283	212.778	-0.27657	0.44766	0.99972	mus301	3L	+	8137808	8142014	3364	protein_coding	NA	427	118	256	751	152	185	6.51717	2.24151	4.55085	13.1718	2.56602	3.06533
FBgn0002901	266.509	138.073	282.793	508.191	96.8667	186.325	-0.12912	0.73215	0.99972	mus304	3L	+	18109814	18112847	2816	protein_coding	NA	344	110	288	659	84	162	6.2721	2.49617	6.11602	13.8074	1.69402	3.20659
FBgn0002905	216.151	141.838	201.293	208.212	123.39	177.124	0.11351	0.69919	0.99972	mus308	3R	-	12705523	12712299	6420	protein_coding	NA	279	113	205	270	107	154	2.23129	1.12476	1.90954	2.48136	0.9465	1.33705
FBgn0002906	536.891	223.427	502.743	1000.19	239.86	277.187	-0.16717	0.65771	0.99972	Blm	3R	-	11736810	11741783	4806	protein_coding	NA	693	178	512	1297	208	241	7.40349	2.36674	6.37082	15.9227	2.45783	2.79508
FBgn0002914	1029.62	835.967	1033.96	1553.88	823.367	909.771	-0.15271	0.59285	0.99972	Myb	X	-	15854832	15857823	2928	protein_coding	NA	1329	666	1053	2015	714	791	24.1372	15.0544	22.2747	42.0543	14.3431	15.596
FBgn0002917	13.9452	30.1249	8.83727	3.08462	18.4508	5.75077	0.4102	0.2893	0.99972	na	X	+	14266367	14277416	7875	protein_coding	NA	18	24	9	4	16	5	0.119388	0.19812	0.0695272	0.0304876	0.11738	0.0360027
FBgn0002921	8693.3	7867.63	7095.35	7993.79	10458.1	7487.5	-0.11979	0.60684	0.99972	Atpalpha	3R	+	20948714	20976239	6680	protein_coding	NA	11221	6268	7226	10366	9069	6510	127.462	88.6146	95.6023	135.311	113.944	80.2794
FBgn0002922	1.54947	0	0	0.771154	0	0	0.028051	0.84665	NA	nau	3R	-	23712814	23718357	1532	protein_coding	NA	2	0	0	1	0	0	0.0672918	0	0	0.0386639	0	0
FBgn0002924	689.514	338.905	615.663	1385.76	215.644	604.981	-0.26558	0.48273	0.99972	ncd	3R	-	29804290	29807127	2720	protein_coding	NA	890	270	627	1797	187	526	18.0616	6.81959	14.8203	41.9072	4.19752	11.5885
FBgn0002926	512.1	235.979	127.649	169.654	147.606	25.3034	0.74862	0.053881	0.93014	ndl	3L	-	6593938	6603366	8230	protein_coding	NA	661	188	130	220	128	22	4.12371	1.45973	0.94461	1.57719	0.883247	0.148999
FBgn0002930	3659.07	6613.68	4032.74	3079.99	8218.68	9642.89	-0.40477	0.23992	0.99972	nec	2R	-	7156477	7158241	1633	protein_coding	NA	4723	5269	4107	3994	7127	8384	148.497	206.185	150.4	144.305	247.852	286.172
FBgn0002931	25.5663	32.6353	19.6384	7.71154	39.208	17.2523	0.16034	0.6799	0.99972	net	2L	-	82421	87387	2225	protein_coding	NA	33	26	20	10	34	15	0.871575	0.854657	0.615237	0.303504	0.993241	0.430087
FBgn0002932	293.625	269.869	205.221	352.418	199.499	225.43	-0.015515	0.95765	0.99972	neur	3R	-	9020348	9039471	4309	protein_coding	NA	379	215	209	457	173	196	5.15613	3.64042	3.31172	7.14455	2.60325	2.89478
FBgn0002937	0	2.51041	3.92768	4.62693	0	0	0.039615	0.86385	0.99972	ninaB	3R	+	13700565	13703164	2164	protein_coding	NA	0	2	4	6	0	0	0	0.0590592	0.110538	0.163589	0	0
FBgn0002938	3.09894	10.0416	0	3.08462	1.15318	1.15015	0.22697	0.46077	0.99972	ninaC	2L	+	7377702	7384344	5425	protein_coding	NA	4	8	0	4	1	1	0.0462139	0.115035	0	0.0531064	0.012779	0.0125426
FBgn0002939	129.381	411.707	149.252	316.944	1092.06	644.086	-1.0136	0.0066633	0.28211	ninaD	2L	+	18081628	18083608	1788	protein_coding	NA	167	328	152	411	947	560	5.58592	13.6546	5.92167	15.7977	35.0359	20.3349
FBgn0002940	2.3242	3.76562	1.96384	3.85577	2.30635	9.20123	-0.28215	0.43317	0.99972	ninaE	3R	-	19886255	19888206	1588	protein_coding	NA	3	3	2	5	2	8	0.0969969	0.120722	0.0753162	0.185772	0.0715239	0.280803
FBgn0002941	0	7.53123	0	0	0	0	0.12477	0.42425	NA	slou	3R	-	21548661	21557182	2670	protein_coding	NA	0	6	0	0	0	0	0	0.1436	0	0	0	0
FBgn0002945	71.2756	57.7394	95.2462	76.3443	153.372	70.1594	-0.30872	0.36441	0.99972	nkd	3L	-	19003741	19045449	5062	protein_coding	NA	92	46	97	99	133	61	0.983472	0.612012	1.20773	1.21614	1.57257	0.707911
FBgn0002948	550.062	253.551	531.218	871.404	116.471	247.283	0.064436	0.86734	0.99972	nod	X	+	11580772	11585750	2449	protein_coding	NA	710	202	541	1130	101	215	15.4205	5.46033	13.6854	28.2028	2.42631	5.06935
FBgn0002962	663.173	146.859	376.075	987.078	166.057	386.452	-0.2141	0.5802	0.99972	nos	3R	+	19157238	19160202	2349	protein_coding	NA	856	117	383	1280	144	336	18.9359	3.22126	9.86808	32.5383	3.52338	8.06911
FBgn0002973	612.815	489.53	515.508	845.185	487.793	495.716	-0.15054	0.59218	0.99972	numb	2L	+	9437469	9464184	4916	protein_coding	NA	791	390	525	1096	423	431	11.4306	7.0143	8.83635	18.2002	6.76109	6.76151
FBgn0002985	16.2694	16.3177	24.548	17.7365	41.5143	28.7538	-0.39464	0.29091	0.99972	odd	2L	-	3604224	3606756	2347	protein_coding	NA	21	13	25	23	36	25	0.459402	0.353953	0.636995	0.578196	0.871086	0.593729
FBgn0002989	237.844	158.156	259.227	374.01	130.309	211.628	-0.096707	0.77597	0.99972	okr	2L	-	2989594	2992759	2878	protein_coding	NA	307	126	264	485	113	184	5.4769	2.79766	5.48557	9.94287	2.22977	3.5636
FBgn0003002	4.64841	6.27603	4.9096	7.71154	9.2254	2.30031	-0.11606	0.76068	0.99972	opa	3R	+	4852813	4869979	2939	protein_coding	NA	6	5	5	10	8	2	0.104819	0.108714	0.101737	0.200753	0.154583	0.0379308
FBgn0003008	230.096	330.119	217.986	261.421	254.852	348.497	-0.13184	0.62983	0.99972	or	2R	+	23967939	23968943	823	protein_coding	NA	297	263	222	339	221	303	18.5286	20.4207	16.131	24.303	15.2498	20.5213
FBgn0003009	5.42314	2.51041	3.92768	3.08462	2.30635	2.30031	0.18938	0.59697	0.99972	ord	2R	-	23271257	23275536	3915	protein_coding	NA	7	2	4	4	2	2	0.117954	0.0419442	0.0785049	0.0774548	0.037276	0.0365864
FBgn0003015	4269.56	1516.29	3185.35	6711.36	1215.45	3023.75	-0.18053	0.63285	0.99972	osk	3R	+	8935126	8938395	2869	protein_coding	NA	5511	1208	3244	8703	1054	2629	98.6249	26.9061	67.6175	178.978	20.8632	51.0766
FBgn0003016	907.989	751.868	715.819	1197.6	761.096	731.498	-0.15523	0.56422	0.99972	osp	2L	-	14599196	14689340	6846	protein_coding	NA	1172	599	729	1553	660	636	9.66974	6.15095	7.00546	14.7242	6.02304	5.69664
FBgn0003023	2060.79	758.144	1432.62	3073.82	708.049	1158.2	-0.14057	0.70639	0.99972	otu	X	-	8485008	8489535	3420	protein_coding	NA	2660	604	1459	3986	614	1007	43.5088	12.2959	27.7954	74.9215	11.1083	17.8813
FBgn0003028	2257.58	1059.39	2022.75	3322.9	509.703	1306.57	0.034158	0.92824	0.99972	ovo	X	+	5048273	5070929	7400	protein_coding	NA	2914	844	2060	4309	442	1136	24.304	8.7611	20.0114	41.2989	4.07751	10.2859
FBgn0003041	921.935	444.343	653.958	1398.1	270.996	610.732	-0.11427	0.75866	0.99972	pbl	3L	-	7896109	7911954	5781	protein_coding	NA	1190	354	666	1813	235	531	16.198	5.99717	10.5587	28.3587	3.53808	7.84665
FBgn0003042	268.058	131.797	228.787	363.985	119.93	165.622	-0.034293	0.92306	0.99972	Pc	3L	-	21306138	21318020	2462	protein_coding	NA	346	105	233	472	104	144	7.21564	2.72531	5.65948	11.3114	2.39893	3.26014
FBgn0003044	1668.78	717.977	1226.42	2234.81	597.345	991.432	-0.056267	0.87657	0.99972	Pcl	2R	+	18135426	18139990	4384	protein_coding	NA	2154	572	1249	2898	518	862	26.9086	8.89343	18.1731	41.6023	7.15747	11.6903
FBgn0003046	218.475	40.1666	219.95	326.198	420.909	280.637	-0.71069	0.056985	0.94752	Pcp	2L	+	7021682	7022470	718	protein_coding	NA	282	32	224	423	365	244	20.1656	2.848	18.6566	34.7597	28.8696	18.9421
FBgn0003048	989.336	999.143	954.425	1171.38	900.63	906.321	-0.016477	0.94087	0.99972	pcx	X	+	2225296	2238045	12119	protein_coding	NA	1277	796	972	1519	781	788	5.42629	4.20972	4.81061	7.41726	3.67069	3.63507
FBgn0003053	426.104	362.754	352.509	289.954	485.487	185.175	0.19703	0.53651	0.99972	peb	X	+	4617564	4627206	7446	protein_coding	NA	550	289	359	376	421	161	4.09677	2.6792	3.11455	3.2184	3.46853	1.3019
FBgn0003057	4.64841	1.25521	0	0	0	0	0.16684	0.34985	NA	CG10598	X	-	17225157	17226867	1711	protein_coding	NA	6	1	0	0	0	0	0.25251	0.0523787	0	0	0	0
FBgn0003062	967.644	798.311	943.624	1041.06	585.813	766.002	0.15428	0.56551	0.99972	Fib	2R	-	23072909	23074725	1318	protein_coding	NA	1249	636	961	1350	508	666	48.6557	30.8359	43.6031	60.4337	21.8887	28.1657
FBgn0003068	527.594	830.946	500.779	366.298	718.428	737.248	0.023588	0.93986	0.99972	per	X	+	2685580	2692780	4527	protein_coding	NA	681	662	510	475	623	641	7.79773	9.43425	6.80164	6.25012	7.89031	7.96809
FBgn0003071	2546.55	2728.82	2411.59	2222.47	2347.86	2693.66	0.075536	0.7149	0.99972	Pfk	2R	+	10109740	10117457	4377	protein_coding	NA	3287	2174	2456	2882	2036	2342	51.8803	42.7061	45.1495	52.2722	35.5439	40.1296
FBgn0003074	10188.5	16610.1	10594.9	6570.23	10913.6	13506.3	0.22068	0.46784	0.99972	Pgi	2R	-	8910900	8914069	2460	protein_coding	NA	13151	13233	10790	8520	9464	11743	286.962	359.378	274.226	213.638	228.415	278.175
FBgn0003076	9965.41	17887.9	12885.7	5082.68	10028	13025.5	0.41545	0.20093	0.99972	Pgm	3L	-	16126018	16128531	1843	protein_coding	NA	12863	14251	13123	6591	8696	11325	358.347	494.123	425.811	211.002	267.958	342.511
FBgn0003079	543.864	405.431	528.273	874.489	374.782	463.512	-0.17065	0.58719	0.99972	phl	X	+	2295466	2343870	4247	protein_coding	NA	702	323	538	1134	325	403	9.61923	5.5085	8.58633	17.8562	4.92574	5.99492
FBgn0003082	337.784	261.083	329.925	205.127	71.4969	93.1624	0.99172	0.003375	0.18144	phr	2R	+	7825289	7827319	1969	protein_coding	NA	436	208	336	266	62	81	12.2595	7.2791	11.0039	8.59491	1.92825	2.47255
FBgn0003087	519.072	208.364	512.562	1317.13	166.057	465.812	-0.3761	0.33016	0.99972	pim	2L	+	10362989	10364092	978	protein_coding	NA	670	166	522	1708	144	405	36.0212	11.1076	32.6871	105.523	8.5631	23.6381
FBgn0003089	30.2147	8.78644	6.87343	15.4231	5.76588	4.60061	0.34565	0.37043	0.99972	pip	3L	-	19298623	19337609	11219	protein_coding	NA	39	7	7	20	5	4	1.18766	0.265311	0.248284	0.699895	0.168416	0.13224
FBgn0003090	122.408	114.224	123.722	80.9712	161.445	169.073	-0.14863	0.63433	0.99972	pk	2R	+	7150703	7223378	6748	protein_coding	NA	158	91	126	105	140	147	1.79277	1.2851	1.66518	1.36909	1.75704	1.81076
FBgn0003091	264.185	286.187	174.782	172.739	493.559	143.769	-0.11017	0.75976	0.99972	Pkc53E	2R	+	16924655	16945126	5739	protein_coding	NA	341	228	178	224	428	125	5.85754	4.87443	3.56126	4.42163	8.13186	2.33102
FBgn0003093	618.238	695.384	633.338	599.958	747.257	572.776	0.018197	0.93587	0.99972	Pkc98E	3R	+	29039156	29049148	5772	protein_coding	NA	798	554	645	778	648	498	10.3911	8.97838	9.78232	11.6416	9.33297	7.03986
FBgn0003114	179.738	90.3748	171.836	384.806	55.3524	132.268	-0.22154	0.56434	0.99972	plu	2R	-	20262958	20263684	616	protein_coding	NA	232	72	175	499	48	115	19.3372	7.46907	16.9889	47.7948	4.42519	10.4059
FBgn0003116	707.333	862.326	829.722	509.733	626.174	1042.04	0.11683	0.68853	0.99972	pn	X	+	2181211	2182916	1638	protein_coding	NA	913	687	845	661	543	906	28.6183	26.8014	30.8498	23.8094	18.826	30.8302
FBgn0003117	70.5009	218.406	92.3004	80.9712	326.349	129.967	-0.30452	0.42372	0.99972	pnr	3R	+	16026079	16041796	4361	protein_coding	NA	91	174	94	105	283	113	1.44429	3.43708	1.73765	1.91503	4.96803	1.947
FBgn0003118	390.466	611.285	395.713	296.894	764.555	564.725	-0.16946	0.60314	0.99972	pnt	3R	-	23290231	23346167	6119	protein_coding	NA	504	487	403	385	663	491	7.61542	9.15842	7.09236	6.68495	11.0806	8.05415
FBgn0003124	2460.56	1048.1	2085.6	4492.75	797.997	1703.38	-0.20325	0.59007	0.99972	polo	3L	+	20309654	20313466	2980	protein_coding	NA	3176	835	2124	5826	692	1481	61.4885	20.12	47.895	129.616	14.8185	31.1274
FBgn0003129	6.97261	12.5521	9.81919	15.4231	8.07223	14.952	-0.22341	0.56642	0.99972	Poxm	3R	-	8319025	8333792	2566	protein_coding	NA	9	10	10	20	7	13	0.180083	0.249034	0.233052	0.459869	0.154922	0.282389
FBgn0003130	0.774735	0	0.981919	0	0	0	0.066928	0.64315	NA	Poxn	2R	-	15826693	15835055	2458	protein_coding	NA	1	0	1	0	0	0	0.0214917	0	0.0250318	0	0	0
FBgn0003132	0	1.25521	0	0	0	0	0.032879	0.81996	NA	Pp1-13C	X	-	15359101	15361061	1892	protein_coding	NA	0	1	0	0	0	0	0	0.0337749	0	0	0	0
FBgn0003134	4527.55	5704.91	5395.65	2444.56	3042.08	3732.25	0.67737	0.0057246	0.25956	Pp1alpha-96A	3R	+	24518270	24522331	3210	protein_coding	NA	5844	4545	5495	3170	2638	3245	110.476	106.935	120.989	68.8637	55.1591	66.5958
FBgn0003137	18801.3	45482.4	21856.5	14335.8	49327.1	27865.9	-0.060863	0.86568	0.99972	Ppn	3R	-	28520665	28540324	9544	protein_coding	NA	24268	36235	22259	18590	42775	24228	140.522	261.136	150.12	123.698	273.959	152.301
FBgn0003139	600.42	581.16	720.729	903.022	423.215	542.872	0.019856	0.94678	0.99972	PpV	X	-	6371065	6372915	1675	protein_coding	NA	775	463	734	1171	367	472	24.487	18.2072	27.0117	42.5172	12.8258	16.1901
FBgn0003141	870.802	1053.12	929.877	652.397	934.072	823.51	0.21896	0.3578	0.99972	pr	2L	-	20073719	20075458	1073	protein_coding	NA	1124	839	947	846	810	716	53.784	49.9663	52.7788	46.5191	42.8704	37.1942
FBgn0003149	645.354	788.269	601.916	346.248	2203.72	672.84	-0.41728	0.2688	0.99972	Prm	3L	-	8732858	8745310	5356	protein_coding	NA	833	628	613	449	1911	585	14.7939	13.8812	12.6801	9.16345	37.5392	11.279
FBgn0003159	684.866	691.618	672.615	1028.72	756.483	715.395	-0.25861	0.27674	0.99972	ptr	X	-	2344949	2366356	5650	protein_coding	NA	884	551	685	1334	656	622	9.81358	7.61298	8.85702	17.0179	8.05497	7.49619
FBgn0003162	852.983	1794.94	992.72	633.889	1314.62	1529.7	0.049708	0.88241	0.99972	Pu	2R	+	21175315	21182608	2152	protein_coding	NA	1101	1430	1011	822	1140	1330	32.8468	53.097	35.1301	28.1807	37.618	43.0757
FBgn0003165	2682.91	2172.76	2442.03	4295.33	1673.26	2197.94	-0.129	0.68343	0.99972	pum	3R	-	9066343	9237682	11798	protein_coding	NA	3463	1731	2487	5570	1451	1911	25.7574	16.0241	21.545	47.6078	11.9372	15.4307
FBgn0003169	814.246	829.691	829.722	913.047	674.607	665.939	0.12026	0.60429	0.99972	put	3R	-	14619030	14625703	4013	protein_coding	NA	1051	661	845	1184	585	579	17.1526	13.4263	16.0623	22.2051	10.5601	10.2584
FBgn0003174	13.1705	28.8697	15.7107	1.54231	18.4508	21.8529	0.2016	0.60207	0.99972	pwn	2R	+	7282572	7300806	5810	protein_coding	NA	17	23	16	2	16	19	0.162269	0.273238	0.17788	0.0219376	0.168924	0.196886
FBgn0003175	1668	1471.1	1592.67	1465.96	1500.28	1477.95	0.08466	0.66606	0.99972	px	2R	-	22494297	22562065	10746	protein_coding	NA	2153	1172	1622	1901	1301	1285	17.8439	12.0893	15.6574	18.1051	11.9264	11.5617
FBgn0003187	443.923	244.765	436.954	757.274	159.138	316.292	-0.087459	0.81298	0.99972	qua	2L	-	17486806	17497208	3792	protein_coding	NA	573	195	445	982	138	275	8.92324	3.77947	8.07142	17.5733	2.37702	4.64917
FBgn0003189	689.514	694.129	680.47	841.329	388.62	493.416	0.21396	0.46923	0.99972	r	X	+	16655359	16668712	7126	protein_coding	NA	890	553	693	1091	337	429	6.56644	5.07801	5.95519	9.24993	2.75014	3.43615
FBgn0003204	1696.67	1612.94	1540.63	1737.41	1157.79	1464.15	0.13789	0.5597	0.99972	ras	X	+	10744502	10749097	2866	protein_coding	NA	2190	1285	1569	2253	1004	1273	44.691	32.6368	37.2925	52.8337	22.6618	28.202
FBgn0003205	1344.94	1325.5	1149.83	1444.37	1449.54	1245.62	-0.10681	0.61224	0.99972	Ras85D	3R	-	9510561	9513067	1958	protein_coding	NA	1736	1056	1171	1873	1257	1083	45.5223	34.464	35.7646	56.4398	36.4581	30.8303
FBgn0003206	539.215	660.238	546.929	698.666	829.133	713.095	-0.32793	0.14235	0.99972	Ras64B	3L	+	4139076	4141398	1620	protein_coding	NA	696	526	557	906	719	620	22.0588	20.7484	20.5612	32.997	25.2049	21.3323
FBgn0003209	1727.66	2312.09	1762.54	1286.29	1965.01	2041.52	0.1153	0.66227	0.99972	raw	2L	-	8709880	8740660	5011	protein_coding	NA	2230	1842	1795	1668	1704	1775	30.7703	31.6333	28.8479	26.4483	26.0065	26.5889
FBgn0003210	1202.39	977.805	1160.63	1517.63	788.772	1002.93	0.011149	0.96828	0.99972	rb	X	-	4535635	4540626	4813	protein_coding	NA	1552	779	1182	1968	684	872	17.7236	11.072	15.7217	25.8261	8.63976	10.8107
FBgn0003218	1048.22	889.941	1006.47	1057.25	597.345	867.216	0.19338	0.4665	0.99972	rdgB	X	+	13762752	13779488	9281	protein_coding	NA	1353	709	1025	1371	518	754	12.6145	8.22709	11.1306	14.6887	5.34179	7.63164
FBgn0003227	101.49	36.401	78.5535	89.4539	31.1357	46.0061	0.24489	0.5109	0.99972	rec	3R	-	15823019	15832632	4131	protein_coding	NA	131	29	80	116	27	40	1.92062	0.529172	1.3661	1.95435	0.437844	0.636657
FBgn0003231	6979.59	8989.78	7461.6	5595.5	11184.6	8431.78	-0.08941	0.75114	0.99972	ref(2)P	2L	+	19542468	19545548	2395	protein_coding	NA	9009	7162	7599	7256	9699	7331	196.832	194.752	193.374	182.176	234.386	173.883
FBgn0003250	3.87367	6.27603	1.96384	4.62693	0	2.30031	0.16998	0.60525	0.99972	Rh4	3L	-	16852527	16862517	1349	protein_coding	NA	5	5	2	6	0	2	0.190303	0.23685	0.0886599	0.262422	0	0.082638
FBgn0003254	1.54947	10.0416	0.981919	3.08462	6.91905	0	0.058954	0.8505	0.99972	rib	2R	+	19270078	19281396	4665	protein_coding	NA	2	8	1	4	6	0	0.0253424	0.126164	0.0147584	0.058244	0.0840918	0
FBgn0003255	27.8905	52.7186	51.0598	20.8212	87.6413	63.2584	-0.23721	0.53092	0.99972	rk	2L	-	13982743	14001248	5386	protein_coding	NA	36	42	52	27	76	55	0.343181	0.498308	0.577359	0.295773	0.801344	0.569191
FBgn0003256	992.435	748.102	921.04	1163.67	751.87	675.14	0.032905	0.90465	0.99972	rl	2R	+	1071462	1125927	7591	protein_coding	NA	1281	596	938	1509	652	587	26.6388	15.4255	22.7191	36.0603	14.9968	13.2519
FBgn0003257	509.001	392.879	411.424	621.55	299.826	261.085	0.11785	0.71274	0.99972	r-l	3R	-	21070557	21073319	2039	protein_coding	NA	657	313	419	806	260	227	16.5438	9.80939	12.2887	23.3227	7.24149	6.20541
FBgn0003261	8439.19	9301.07	9713.14	8227.45	8205.99	8359.32	0.13749	0.47521	0.99972	Rm62	3R	-	6000426	6008579	5386	protein_coding	NA	10893	7410	9892	10669	7116	7268	172.779	146.282	182.747	194.465	124.843	125.151
FBgn0003267	0.774735	0	0.981919	3.85577	8.07223	4.60061	-0.64662	0.055866	0.94468	ro	3R	-	26876771	26881171	1241	protein_coding	NA	1	0	1	5	7	4	0.0426089	0	0.0496274	0.244818	0.3299	0.185027
FBgn0003268	475.687	240.999	393.75	828.22	219.103	384.151	-0.25502	0.47852	0.99972	rod	3R	+	31580951	31588244	6479	protein_coding	NA	614	192	401	1074	190	334	4.86572	1.89369	3.70122	9.78041	1.6654	2.87343
FBgn0003270	3.87367	0	0	21.5923	0	0	-0.19562	NA	NA	amos	2L	-	18596136	18596921	786	protein_coding	NA	5	0	0	28	0	0	0.326614	0	0	2.10182	0	0
FBgn0003274	18368.2	29904	26449	13052.6	22936.7	28798.7	0.16674	0.58648	0.99972	RpLP2	2R	+	16586129	16586732	604	protein_coding	NA	23709	23824	26936	16926	19890	25039	2015.41	2520.53	2666.89	1653.4	1870.12	2310.69
FBgn0003275	371.098	404.176	400.623	370.925	384.007	380.701	0.045921	0.82812	0.99972	RpII18	3R	+	5371795	5372397	541	protein_coding	NA	479	322	408	481	333	331	45.4595	38.0341	45.0995	52.4576	34.9558	34.103
FBgn0003277	1895.78	1530.1	1692.83	2547.89	1157.79	1483.7	-0.016607	0.95555	0.99972	RpII215	X	-	11562800	11570326	6736	protein_coding	NA	2447	1219	1724	3304	1004	1290	18.6517	11.5642	15.3054	28.94	8.46454	10.6745
FBgn0003278	362.576	239.744	299.485	355.502	252.545	211.628	0.11547	0.68609	0.99972	RpI135	2L	+	404285	407969	3564	protein_coding	NA	468	191	305	461	219	184	6.7421	3.42461	5.11766	7.63175	3.48962	2.87768
FBgn0003279	29091.3	35433.2	31940.8	22498.4	30388.5	33173.9	0.14766	0.53476	0.99972	RpL4	3R	+	27922821	27924888	1400	protein_coding	NA	37550	28229	32529	29175	26352	28843	1377.11	1288.49	1389.48	1229.54	1068.95	1148.35
FBgn0003285	128.606	57.7394	86.4089	205.127	77.2627	88.5618	-0.308	0.3927	0.99972	rst	X	-	2950399	2973834	6251	protein_coding	NA	166	46	88	266	67	77	1.53985	0.531074	0.950767	2.83547	0.687431	0.775416
FBgn0003292	316.092	125.521	262.172	343.164	42.6675	161.021	0.20984	0.58668	0.99972	rt	3L	-	11584122	11587770	3268	protein_coding	NA	408	100	267	445	37	140	6.4101	1.95539	4.88583	8.03413	0.642971	2.38785
FBgn0003295	1.54947	1.25521	0	0	4.6127	0	-0.052506	0.80209	NA	ru	3L	+	1370628	1387437	1798	protein_coding	NA	2	1	0	0	4	0	0.057112	0.0355406	0	0	0.12634	0
FBgn0003300	3.09894	10.0416	4.9096	25.4481	4.6127	6.90092	-0.4115	0.27917	0.99972	run	X	+	20690670	20697321	3145	protein_coding	NA	4	8	5	33	4	6	0.0790815	0.196849	0.115135	0.749726	0.0874702	0.128778
FBgn0003301	335.46	433.046	394.731	263.735	829.133	457.761	-0.31321	0.35037	0.99972	rut	X	-	14787478	14826073	9618	protein_coding	NA	433	345	402	342	719	398	2.5767	2.55519	2.78628	2.33871	4.7325	2.57119
FBgn0003302	55.7809	50.2082	50.0779	67.8616	61.1183	59.808	-0.22748	0.4408	0.99972	rux	X	-	6035753	6037800	1463	protein_coding	NA	72	40	51	88	53	52	2.69835	1.86575	2.22617	3.78986	2.19699	2.11565
FBgn0003308	1454.95	2505.39	1640.79	759.587	1713.62	2019.67	0.24412	0.46	0.99972	ry	3R	+	13032528	13038020	4337	protein_coding	NA	1878	1996	1671	985	1486	1756	22.2327	29.4094	23.0407	13.4001	19.4581	22.5682
FBgn0003310	787.905	385.348	753.132	1083.47	375.935	627.984	-0.085287	0.80471	0.99972	S	2L	-	1049674	1077815	5206	protein_coding	NA	1017	307	767	1405	326	546	13.9728	5.24965	12.2739	22.1827	4.95412	8.14388
FBgn0003312	1662.58	3394.08	2947.72	1272.4	5422.23	3920.87	-0.28033	0.43874	0.99972	sad	3R	+	11877235	11879754	1773	protein_coding	NA	2146	2704	3002	1650	4702	3409	62.1452	97.4569	101.254	54.908	150.607	107.172
FBgn0003317	714.306	484.509	649.049	945.435	403.611	499.167	-0.00081827	0.99794	0.99972	sax	2R	+	7806484	7810067	2865	protein_coding	NA	922	386	661	1226	350	434	18.7332	9.76106	15.6425	28.625	7.86565	9.57296
FBgn0003319	9.29682	10.0416	11.783	4.62693	24.2167	8.05107	-0.10412	0.78923	0.99972	Sb	3R	+	16116161	16145284	4180	protein_coding	NA	12	8	12	6	21	7	0.157859	0.13098	0.183862	0.0907013	0.305557	0.099968
FBgn0003321	942.852	930.107	913.185	1010.98	857.962	738.399	0.086377	0.69967	0.99972	sbr	X	-	10832752	10847092	3280	protein_coding	NA	1217	741	930	1311	744	642	19.0504	14.4364	16.9558	23.5825	12.8816	10.91
FBgn0003328	2047.62	4212.47	2229.94	1459.02	4284.05	2452.13	0.037329	0.91413	0.99972	scb	2R	+	15248784	15258498	5004	protein_coding	NA	2643	3356	2271	1892	3715	2132	30.3311	47.9337	30.355	24.9509	47.1558	26.5615
FBgn0003330	259.536	197.067	286.72	377.094	156.832	238.082	-0.044477	0.88913	0.99972	Sce	3R	-	27680431	27682029	1542	protein_coding	NA	335	157	292	489	136	207	11.1544	6.50624	11.3242	18.7105	5.00872	7.48252
FBgn0003334	884.747	552.29	859.179	1310.96	469.342	695.843	-0.083212	0.80282	0.99972	Scm	3R	-	9633359	9637611	4069	protein_coding	NA	1142	440	875	1700	407	605	14.9654	7.17634	13.3553	25.6003	5.89932	8.60702
FBgn0003345	525.27	464.426	416.334	345.477	704.59	433.608	-0.063056	0.83001	0.99972	sd	X	+	15804370	15827682	8766	protein_coding	NA	678	370	424	448	611	377	10.1313	6.88119	7.37941	7.69282	10.0986	6.11575
FBgn0003346	980.814	582.415	876.854	1576.24	523.541	754.501	-0.16857	0.62126	0.99972	RanGAP	2L	+	19441959	19447317	2401	protein_coding	NA	1266	464	893	2044	454	656	29.7624	13.5763	24.4516	55.219	11.8052	16.7422
FBgn0003353	91.4187	80.3331	82.4812	112.589	51.8929	63.2584	0.11698	0.72064	0.99972	sei	2R	+	24047411	24053035	3278	protein_coding	NA	118	64	84	146	45	55	2.09784	1.41611	1.73937	2.98275	0.884886	1.06152
FBgn0003356	119.309	5.02082	2043.37	5986.47	0	0	-0.05751	NA	NA	Jon99Cii	3R	-	29923754	29924615	862	protein_coding	NA	154	4	2081	7763	0	0	9.17277	0.296529	144.369	531.353	0	0
FBgn0003357	85.2208	0	1943.22	5089.62	0	2.30031	-0.05276	NA	NA	Jon99Ciii	3R	+	29922216	29923455	1240	protein_coding	NA	110	0	1979	6600	0	2	5.43581	0	113.904	374.791	0	0.107294
FBgn0003358	37.1873	0	1196.96	1811.44	0	6.90092	-0.024311	NA	NA	Jon99Ci	3R	-	29925226	29926189	907	protein_coding	NA	48	0	1219	2349	0	6	2.7172	0	80.3721	152.805	0	0.368728
FBgn0003360	16087.4	20493.7	17564.6	13250	16832.9	19084.5	0.12487	0.59873	0.99972	sesB	X	-	10780893	10786958	2006	protein_coding	NA	20765	16327	17888	17182	14597	16593	622.752	609.421	624.837	592.148	484.208	540.235
FBgn0003366	501.253	734.295	633.338	252.939	787.619	516.419	0.20021	0.54992	0.99972	sev	X	-	11071441	11086299	8171	protein_coding	NA	647	585	645	328	683	449	4.06552	4.57505	4.72056	2.36842	4.74698	3.0629
FBgn0003371	3488.63	3946.37	3284.52	3003.65	3913.88	3363.05	0.055141	0.80198	0.99972	sgg	X	+	2633952	2679553	12445	protein_coding	NA	4503	3144	3345	3895	3394	2924	66.9177	58.1499	57.8971	66.5151	55.7873	47.1727
FBgn0003372	0.774735	3.76562	0.981919	3.08462	4.6127	1.15015	-0.1577	0.62444	0.99972	Sgs1	2L	+	4937409	4941423	3950	protein_coding	NA	1	3	1	4	4	1	0.0129984	0.0485332	0.0151395	0.059748	0.0575089	0.0141112
FBgn0003374	0	1.25521	0	0	0	1.15015	-0.0011701	0.99354	NA	Sgs4	X	+	3250089	3251040	952	protein_coding	NA	0	1	0	0	0	1	0	0.067124	0	0	0	0.0585497
FBgn0003377	0.774735	3.76562	0.981919	0	0	0	0.22542	0.2699	NA	Sgs7	3L	+	11509861	11510247	321	protein_coding	NA	1	3	1	0	0	0	0.159949	0.597216	0.186296	0	0	0
FBgn0003378	1.54947	6.27603	0.981919	3.08462	14.9913	0	-0.21068	0.50428	0.99972	Sgs8	3L	-	11508967	11509394	359	protein_coding	NA	2	5	1	4	13	0	0.286037	0.890001	0.166577	0.657395	2.05646	0
FBgn0003380	19.3684	28.8697	9.81919	0.771154	59.9651	12.6517	-0.11095	0.76351	0.99972	Sh	X	-	17924307	18063247	22552	protein_coding	NA	25	23	10	1	52	11	0.324467	0.371524	0.151166	0.0149144	0.746481	0.154988
FBgn0003382	0.774735	5.02082	4.9096	1.54231	2.30635	1.15015	0.23989	0.46622	0.99972	sha	2R	+	11324314	11336463	6115	protein_coding	NA	1	4	5	2	2	1	0.00861471	0.0428873	0.0501687	0.0197991	0.019057	0.00935224
FBgn0003386	10.8463	17.5729	23.5661	13.1096	76.1096	16.1021	-0.49326	0.20687	0.99972	Shaw	2L	+	3718185	3729145	5000	protein_coding	NA	14	14	24	17	66	14	0.207869	0.258713	0.415045	0.290058	1.0839	0.225665
FBgn0003388	28.6652	72.8019	41.2406	27.7616	50.7397	51.7569	0.087097	0.81085	0.99972	shd	3L	+	14614458	14622205	3016	protein_coding	NA	37	58	42	36	44	45	0.775711	1.5134	1.02558	0.86731	1.02032	1.0242
FBgn0003390	751.493	1127.17	844.45	363.985	1052.85	1318.08	-0.004247	0.99025	0.99972	shf	X	-	6771463	6779659	1796	protein_coding	NA	970	898	860	472	913	1146	28.2172	32.5122	29.1382	15.7782	29.3764	36.1911
FBgn0003391	1066.04	907.513	957.371	1377.28	821.061	675.14	0.023246	0.93599	0.99972	shg	2R	-	21049654	21057197	6400	protein_coding	NA	1376	723	975	1786	712	587	11.0389	7.21894	9.11032	16.465	6.31789	5.11234
FBgn0003392	1341.84	1528.84	1302.02	1624.05	1816.25	1382.48	-0.19071	0.38997	0.99972	shi	X	+	15892116	15906716	5989	protein_coding	NA	1732	1218	1326	2106	1575	1202	23.3344	20.4232	20.8072	32.6047	23.47	17.5803
FBgn0003396	1532.43	1889.08	1374.69	1267.78	1852	1359.48	0.08692	0.7312	0.99972	shn	2R	+	11159086	11217394	10997	protein_coding	NA	1978	1505	1400	1644	1606	1182	10.8224	10.2486	8.92173	10.3365	9.71918	7.02087
FBgn0003401	292.075	140.583	283.775	306.148	235.248	210.478	-0.054797	0.86012	0.99972	shu	2R	-	23841461	23843286	1694	protein_coding	NA	377	112	289	397	204	183	11.4265	4.22493	10.2022	13.8273	6.83894	6.02143
FBgn0003410	1127.24	706.681	1049.67	1905.52	643.472	955.778	-0.21225	0.52883	0.99972	sina	3L	+	16853751	16858712	3257	protein_coding	NA	1455	563	1069	2471	558	831	25.4792	12.2704	21.8033	49.7244	10.8079	15.7979
FBgn0003411	0	8.78644	0.981919	11.5673	0	4.60061	-0.12078	0.67117	0.99972	sisA	X	-	11321579	11322357	779	protein_coding	NA	0	7	1	15	0	4	0	0.574216	0.0767665	1.13609	0	0.28621
FBgn0003415	2205.67	1494.95	2043.37	3159.42	1058.61	1652.77	-0.024211	0.94199	0.99972	skd	3L	-	20992814	21027434	12307	protein_coding	NA	2847	1191	2081	4097	918	1437	13.737	7.15227	11.695	22.7166	4.89928	7.52724
FBgn0003416	667.821	445.598	557.73	882.972	288.294	517.569	-0.012057	0.97129	0.99972	sl	X	+	16350315	16356482	5678	protein_coding	NA	862	355	568	1145	250	450	7.79469	3.99529	5.98221	11.8979	2.50044	4.41752
FBgn0003423	978.49	546.014	713.855	1140.54	749.564	603.831	-0.12705	0.67568	0.99972	slgA	X	+	21374002	21385159	4305	protein_coding	NA	1263	435	727	1479	650	525	19.1515	8.20951	12.8397	25.7716	10.9018	8.64239
FBgn0003429	55.0062	56.4842	34.3672	17.7365	99.1731	39.1052	-0.052913	0.89057	0.99972	slo	3R	+	24662491	24711595	10153	protein_coding	NA	71	45	35	23	86	34	0.704561	0.555777	0.40453	0.262278	0.943939	0.366281
FBgn0003430	0	1.25521	2.94576	10.025	13.8381	2.30031	-0.62482	0.070791	0.99972	slp1	2L	+	3825675	3827099	1425	protein_coding	NA	0	1	3	13	12	2	0	0.0448436	0.125897	0.538256	0.478232	0.0782306
FBgn0003435	319.966	321.333	239.588	172.739	244.473	182.874	0.48149	0.069769	0.99972	sm	2R	-	19517864	19631508	16635	protein_coding	NA	413	256	244	224	212	159	4.18078	3.22534	2.87687	2.60573	2.37371	1.74735
FBgn0003444	294.399	178.239	254.317	406.398	175.283	243.833	-0.14402	0.65553	0.99972	smo	2L	+	277582	282167	4008	protein_coding	NA	380	142	259	527	152	212	4.86791	2.264	3.86439	7.75789	2.15371	2.94829
FBgn0003447	835.939	353.968	825.794	1593.2	239.86	508.368	-0.12905	0.73654	0.99972	sn	X	+	7964024	7986601	3507	protein_coding	NA	1079	282	841	2066	208	442	19.7293	6.41751	17.9105	43.4104	4.20667	8.77378
FBgn0003449	530.693	412.963	656.904	776.552	494.712	659.038	-0.23115	0.40096	0.99972	snf	X	+	5309242	5310501	835	protein_coding	NA	685	329	669	1007	429	573	42.1203	25.1782	47.9125	71.1547	29.1771	38.2499
FBgn0003450	35.6378	21.3385	35.3491	75.5731	21.9103	24.1532	-0.24415	0.52354	0.99972	snk	3R	-	13040165	13042770	1435	protein_coding	NA	46	17	36	98	19	21	1.67267	0.769359	1.52467	4.09498	0.764171	0.828984
FBgn0003459	330.812	205.854	272.974	442.643	192.58	210.478	-0.049508	0.88018	0.99972	stwl	3L	-	14402930	14409939	4334	protein_coding	NA	427	164	278	574	167	183	5.81223	2.77835	4.4074	8.97844	2.5143	2.70421
FBgn0003460	17.0442	16.3177	17.6745	3.85577	47.2802	8.05107	-0.083611	0.82832	0.99972	so	2R	+	7419350	7434872	2786	protein_coding	NA	22	13	18	5	41	7	0.405442	0.298179	0.386367	0.105889	0.835747	0.140049
FBgn0003462	7516.48	12201.9	10538	6004.98	13978.8	12344.6	-0.076224	0.80819	0.99972	Sod	3L	-	11112281	11113740	777	protein_coding	NA	9702	9721	10732	7787	12122	10733	658.91	821.682	848.922	607.728	910.593	791.336
FBgn0003463	150.299	263.593	187.547	116.444	387.467	203.577	-0.16775	0.63361	0.99972	sog	X	-	15603283	15633434	6442	protein_coding	NA	194	210	191	151	336	177	1.96851	2.65206	2.25731	1.76071	3.77104	1.94977
FBgn0003464	1367.41	936.383	1237.22	2096	774.934	1155.9	-0.14482	0.65508	0.99972	sol	X	+	21350280	21357912	5724	protein_coding	NA	1765	746	1260	2718	672	1005	16.999	8.94221	14.1342	30.0816	7.15867	10.508
FBgn0003475	1642.44	2077.36	1642.75	2140.72	2383.61	2009.32	-0.26031	0.23894	0.99972	spir	2L	+	20311219	20348386	6505	protein_coding	NA	2120	1655	1673	2776	2067	1747	28.5617	27.7507	26.2522	42.9775	30.8016	25.5515
FBgn0003479	175.865	171.963	190.492	278.387	88.7945	207.028	-0.072212	0.83061	0.99972	spn-A	3R	-	30054696	30056037	1342	protein_coding	NA	227	137	194	361	77	180	8.89017	6.67779	8.84928	16.2467	3.33549	7.653
FBgn0003480	106.139	32.6353	75.6078	144.206	29.9826	58.6578	-0.070266	0.85535	0.99972	spn-B	3R	+	14328051	14329608	1384	protein_coding	NA	137	26	77	187	26	51	5.08243	1.20047	3.32708	7.97198	1.06686	2.05398
FBgn0003482	30.2147	18.8281	52.0417	82.5135	12.6849	35.6548	-0.20271	0.60316	0.99972	spn-D	3R	+	27165716	27167122	1026	protein_coding	NA	39	15	53	107	11	31	1.95166	0.934241	3.08914	6.15314	0.60886	1.68413
FBgn0003483	796.427	426.77	680.47	1217.65	290.6	518.719	-0.06242	0.8635	0.99972	spn-E	3R	+	15837419	15844415	4678	protein_coding	NA	1028	340	693	1579	252	451	11.2829	4.64444	8.85895	19.9151	3.05923	5.37376
FBgn0003486	89.0945	21.3385	20.6203	53.2096	20.7572	8.05107	0.31361	0.42133	0.99972	spo	3L	-	5590083	5592571	2489	protein_coding	NA	115	17	21	69	18	7	2.52546	0.464643	0.537135	1.74127	0.43722	0.166884
FBgn0003495	828.192	755.634	790.445	1092.73	714.969	818.909	-0.13036	0.59374	0.99972	spz	3R	-	27064990	27070070	2364	protein_coding	NA	1069	602	805	1417	620	712	27.5396	19.3021	24.1545	41.9492	17.6667	19.9129
FBgn0003499	37.1873	60.2499	33.3853	30.8462	99.1731	44.856	-0.27338	0.46208	0.99972	sr	3R	+	18090803	18135583	8113	protein_coding	NA	48	48	34	40	86	39	0.466584	0.580708	0.384937	0.446809	0.924638	0.411555
FBgn0003502	1750.13	1459.8	1545.54	2275.68	1376.89	1392.84	-0.074193	0.78109	0.99972	Btk29A	2L	-	8258373	8301079	9022	protein_coding	NA	2259	1163	1574	2951	1194	1211	29.641	18.9926	24.0549	44.4959	17.3287	17.2503
FBgn0003507	1888.03	2972.33	2001.15	1186.04	2766.47	2453.28	0.078839	0.80299	0.99972	srp	3R	+	15986152	16004081	5668	protein_coding	NA	2437	2368	2038	1538	2399	2133	32.4157	39.2021	31.5737	23.5088	35.2951	30.801
FBgn0003512	338.559	350.202	404.551	473.489	359.791	280.637	-0.025075	0.92524	0.99972	Sry-delta	3R	+	30043341	30044886	1546	protein_coding	NA	437	279	412	614	312	244	14.5131	11.5321	15.9366	23.4325	11.4609	8.79715
FBgn0003513	5.42314	7.53123	0	1.54231	0	5.75077	0.13554	0.64149	0.99972	ss	3R	-	16374434	16403690	5191	protein_coding	NA	7	6	0	2	0	5	0.0816831	0.0871392	0	0.0268187	0	0.0633401
FBgn0003514	1411.57	2199.12	1563.22	1369.57	2470.1	1864.4	-0.11842	0.67855	0.99972	sqh	X	-	6223061	6225140	1578	protein_coding	NA	1822	1752	1592	1776	2142	1621	81.559	97.608	83.002	91.3567	106.054	78.7737
FBgn0003515	123.958	79.0779	12.7649	26.2192	4.6127	9.20123	1.0486	0.0070473	0.28726	st	3L	+	16497651	16500460	2146	protein_coding	NA	160	63	13	34	4	8	3.82805	1.87597	0.362262	0.934781	0.105853	0.207789
FBgn0003517	29282.7	42468.6	36104.2	22284	36146.3	39021.3	0.12497	0.65083	0.99972	sta	X	-	1481797	1483413	1338	protein_coding	NA	37797	33834	36769	28897	31345	33927	1798.55	2003.76	2037.84	1580.13	1649.75	1752.61
FBgn0003520	1557.99	947.68	1424.76	2503.94	928.306	1077.69	-0.14966	0.65701	0.99972	stau	2R	-	18117896	18125779	5369	protein_coding	NA	2011	755	1451	3247	805	937	22.6778	10.5965	19.0581	42.0771	10.0408	11.4711
FBgn0003525	2677.48	1114.62	2372.32	3907.44	688.445	1477.95	0.013294	0.97195	0.99972	stg	3R	-	29251826	29255800	3064	protein_coding	NA	3456	888	2416	5067	597	1285	66.5081	21.2688	54.1527	112.054	12.7075	26.846
FBgn0003527	141.002	37.6562	122.74	211.296	39.208	104.664	-0.13613	0.72471	0.99972	stil	2R	+	12570367	12571883	1171	protein_coding	NA	182	30	125	274	34	91	7.97997	1.63712	6.38355	13.8056	1.6489	4.33158
FBgn0003545	385.043	209.619	474.267	794.289	155.679	255.334	-0.10936	0.77233	0.99972	sub	2R	-	17745500	17748078	2460	protein_coding	NA	497	167	483	1030	135	222	11.1334	4.65604	12.6021	26.5145	3.34496	5.39883
FBgn0003557	2907.58	3847.2	2650.2	2775.38	4071.86	3420.56	-0.11127	0.663	0.99972	Su(dx)	2L	+	2037714	2044372	4798	protein_coding	NA	3753	3065	2699	3599	3531	2974	47.2286	48.0049	39.5596	52.0454	49.1484	40.6296
FBgn0003559	356.378	401.666	331.889	393.289	311.357	342.746	0.049714	0.83121	0.99972	su(f)	X	+	23096771	23101431	3014	protein_coding	NA	460	320	338	510	270	298	8.69271	7.52619	7.43937	11.0749	5.64347	6.11348
FBgn0003567	966.094	615.051	972.1	1398.87	498.172	638.335	0.0071833	0.98303	0.99972	su(Hw)	3R	-	14304455	14308589	3682	protein_coding	NA	1247	490	990	1814	432	555	18.3823	8.98995	16.9977	30.7287	7.04372	8.8818
FBgn0003575	1000.96	825.925	1033.96	1273.95	588.119	760.251	0.10284	0.72988	0.99972	su(s)	X	+	635890	643760	5047	protein_coding	NA	1292	658	1053	1652	510	661	13.7741	8.7308	13.0753	20.2388	6.01389	7.65027
FBgn0003598	1577.36	817.139	1497.43	2658.94	644.625	1127.15	-0.12827	0.72393	0.99972	Su(var)3-7	3R	+	13264364	13270038	5051	protein_coding	NA	2036	651	1525	3448	559	980	22.5584	8.97718	19.6799	43.9007	6.85058	11.7878
FBgn0003607	1296.91	1010.44	1237.22	2032.76	1138.18	1159.35	-0.24435	0.3879	0.99972	Su(var)205	2L	-	8209626	8211122	1109	protein_coding	NA	1674	805	1260	2636	987	1008	81.7786	48.945	71.693	147.98	53.3318	53.4588
FBgn0003612	1767.95	901.237	1538.67	2625.78	768.015	990.282	-0.041688	0.90725	0.99972	Su(var)2-10	2R	+	9116122	9122000	5039	protein_coding	NA	2282	718	1567	3405	666	861	48.6975	19.0697	38.9478	83.4992	15.7199	19.9466
FBgn0003638	1807.46	1788.67	1466.01	1623.28	1576.39	1387.09	0.13023	0.5467	0.99972	su(w[a])	X	+	1012779	1046040	5658	protein_coding	NA	2333	1425	1493	2105	1367	1206	31.2591	23.7632	23.2993	32.4106	20.2589	17.5422
FBgn0003651	1146.61	1523.82	1395.31	522.843	1315.77	1343.38	0.27773	0.38765	0.99972	svp	3R	+	12258737	12302785	5595	protein_coding	NA	1480	1214	1421	678	1141	1168	21.6863	22.1396	24.2515	11.4163	18.4924	18.5798
FBgn0003654	491.182	480.744	475.249	537.495	573.128	560.125	-0.19155	0.34827	0.99972	sw	X	-	20227961	20236382	3304	protein_coding	NA	634	383	484	697	497	487	11.4378	8.59961	10.17	14.4497	9.9173	9.53797
FBgn0003655	1657.16	685.342	1508.23	2955.06	550.064	1033.99	-0.14884	0.69381	0.99972	swa	X	-	6363418	6365708	2022	protein_coding	NA	2139	546	1536	3832	477	899	54.3146	17.2555	45.4275	111.816	13.397	24.7822
FBgn0003656	3245.36	3446.79	3070.46	2905.71	2952.13	3626.43	0.038443	0.8562	0.99972	sws	X	-	7956820	7968236	5963	protein_coding	NA	4189	2746	3127	3768	2560	3153	49.3639	40.2743	42.919	51.0251	33.3675	40.3365
FBgn0003660	2424.92	3071.49	2385.08	2209.36	3987.68	3695.44	-0.28008	0.30957	0.99972	Syb	2R	-	10249435	10252417	1237	protein_coding	NA	3130	2447	2429	2865	3458	3213	167.576	163.054	151.467	176.265	204.776	186.747
FBgn0003676	2381.54	1575.28	2049.27	3085.39	1494.51	1713.73	-0.055186	0.8555	0.99972	T-cp1	3R	-	22489105	22491439	1980	protein_coding	NA	3074	1255	2087	4001	1296	1490	81.0218	41.1689	64.0682	121.183	37.7823	42.6343
FBgn0003687	410.609	230.958	433.026	671.675	238.707	315.142	-0.13957	0.68649	0.99972	Tbp	2R	-	21686192	21687642	1387	protein_coding	NA	530	184	441	871	207	274	19.6194	8.47727	19.0139	37.0512	8.47551	11.0112
FBgn0003701	686.415	348.947	594.061	1321.76	224.869	379.551	-0.14922	0.69461	0.99972	thr	2R	-	17861273	17865963	4578	protein_coding	NA	886	278	605	1714	195	330	10.1814	3.976	8.0975	22.6338	2.47853	4.11683
FBgn0003710	12.3958	7.53123	2.94576	1.54231	8.07223	8.05107	0.1459	0.69656	0.99972	tipE	3L	+	4188499	4193788	4084	protein_coding	NA	16	6	3	2	7	7	0.224025	0.104558	0.0489237	0.0321795	0.108407	0.106402
FBgn0003714	320.74	311.291	415.352	387.119	220.256	358.848	0.097215	0.73166	0.99972	tko	X	-	2442313	2443976	1596	protein_coding	NA	414	248	423	502	191	312	18.8109	14.0245	22.3857	26.2111	9.59902	15.39
FBgn0003716	872.351	682.832	789.463	995.56	652.697	678.591	0.0091931	0.97157	0.99972	tkv	2L	-	5219000	5271384	4433	protein_coding	NA	1126	544	804	1291	566	590	18.5357	11.1455	15.4152	24.4215	10.3056	10.5438
FBgn0003719	197.557	335.14	369.202	124.156	242.167	249.583	0.43052	0.18323	0.99972	tld	3R	+	24749731	24753510	3359	protein_coding	NA	255	267	376	161	210	217	3.89778	5.07944	6.69402	2.82798	3.55043	3.6009
FBgn0003720	2.3242	0	0	13.8808	0	1.15015	-0.25977	0.3004	0.99972	tll	3R	+	30852315	30854400	1965	protein_coding	NA	3	0	0	18	0	1	0.0783873	0	0	0.540469	0	0.0283661
FBgn0003721	2892.86	2447.65	2721.88	3489.47	3253.11	2395.77	-0.16234	0.49247	0.99972	Tm1	3R	+	15281371	15308779	9463	protein_coding	NA	3734	1950	2772	4525	2821	2083	104.421	67.8698	90.2879	145.414	87.2574	63.238
FBgn0003731	1998.04	2806.64	1891.18	1347.98	2428.59	3231.93	-0.052688	0.86574	0.99972	Egfr	2R	+	21522420	21559977	6947	protein_coding	NA	2579	2236	1926	1748	2106	2810	22.4015	24.1727	19.4852	17.4478	20.2334	26.4976
FBgn0003732	3090.42	1597.88	2471.49	5199.89	1081.68	2043.82	-0.1451	0.69382	0.99972	Top2	2L	-	19447365	19453490	5242	protein_coding	NA	3989	1273	2517	6743	938	1777	40.2535	15.9881	29.5832	78.1928	10.4695	19.4671
FBgn0003733	559.359	294.973	573.441	970.112	116.471	406.004	-0.038404	0.92034	0.99972	tor	2R	-	7705183	7709184	3131	protein_coding	NA	722	235	584	1258	101	353	11.8662	4.80697	11.1792	23.7591	1.83604	6.29833
FBgn0003741	177.414	164.432	134.523	78.6577	183.355	113.865	0.27267	0.39461	0.99972	tra	3L	-	16590059	16591050	862	protein_coding	NA	229	131	137	102	159	99	15.1712	10.8015	10.5713	7.76532	11.6511	7.12025
FBgn0003742	262.635	345.181	331.889	305.377	385.16	366.899	-0.152	0.53366	0.99972	tra2	2R	-	14602004	14604337	1844	protein_coding	NA	339	275	338	396	334	319	12.4236	12.5432	14.4274	16.677	13.5388	12.6915
FBgn0003744	1054.41	932.618	1097.79	1328.7	833.746	998.333	-0.031455	0.90044	0.99972	trc	3L	-	19830864	19834304	2816	protein_coding	NA	1361	743	1118	1723	723	868	27.4357	18.6412	26.2495	39.9132	16.1206	18.9956
FBgn0003747	0.774735	6.27603	0	2.31346	1.15318	0	0.10874	0.66707	0.99972	Gr5a	X	+	5680617	5682488	1490	protein_coding	NA	1	5	0	3	1	0	0.0344588	0.214436	0	0.118794	0.0381141	0
FBgn0003748	4694.89	4607.86	4022.92	2700.58	7455.28	4609.82	-0.1174	0.71049	0.99972	Treh	2R	+	21074018	21088945	4369	protein_coding	NA	6060	3671	4097	3502	6465	4008	106.192	80.063	83.6195	70.5195	125.306	76.2468
FBgn0003751	39.5115	18.8281	53.0236	40.8712	6.91905	33.3545	0.24492	0.52956	0.99972	trk	2L	-	10271443	10272324	882	protein_coding	NA	51	15	54	53	6	29	2.96885	1.08677	3.66129	3.54542	0.386327	1.8327
FBgn0003861	0.774735	1.25521	0	0	4.6127	0	-0.08155	0.68813	NA	trp	3R	-	29914521	29920289	4149	protein_coding	NA	1	1	0	0	4	0	0.0124048	0.015439	0	0	0.0548828	0
FBgn0003862	915.737	803.331	885.691	951.604	822.214	716.546	0.058637	0.7936	0.99972	trx	3R	-	14263358	14286903	14052	protein_coding	NA	1182	640	902	1234	713	623	4.74869	3.2001	4.2207	5.69698	3.16833	2.71718
FBgn0003863	168.892	82.8436	2653.15	5728.13	156.832	97.763	-0.14728	NA	NA	alphaTry	2R	-	11344260	11345119	860	protein_coding	NA	218	66	2702	7428	136	85	13.015	4.90411	187.887	509.605	8.98074	5.50912
FBgn0003866	119.309	91.63	87.3908	101.792	140.687	93.1624	-0.13711	0.63945	0.99972	tsh	2L	+	21828593	21837011	4732	protein_coding	NA	154	73	89	132	122	81	1.67095	0.985809	1.12475	1.64585	1.46415	0.954118
FBgn0003867	1007.93	1673.19	1154.74	536.723	1065.53	1651.62	0.17886	0.59588	0.99972	tsl	3R	-	21778114	21782536	2059	protein_coding	NA	1301	1333	1176	696	924	1436	37.7817	48.1796	39.7772	23.2267	29.6798	45.2724
FBgn0003870	1548.7	1281.56	1419.86	1689.6	1209.68	1241.02	0.033615	0.88763	0.99972	ttk	3R	+	31713867	31735392	7557	protein_coding	NA	1999	1021	1446	2191	1049	1079	25.2798	16.07	21.2986	31.8403	14.6731	14.8135
FBgn0003882	820.444	677.811	732.512	919.987	710.356	790.155	-0.10694	0.63661	0.99972	tub	3R	+	4387742	4389813	2006	protein_coding	NA	1059	540	746	1193	616	687	27.1052	17.202	22.2391	35.0889	17.439	19.0892
FBgn0003884	9667.14	10496	10131.4	13662.5	8483.91	10253.6	-0.086307	0.72478	0.99972	alphaTub84B	3R	+	7086599	7088839	1752	protein_coding	NA	12478	8362	10318	17717	7357	8915	365.677	304.994	352.185	596.646	238.473	283.628
FBgn0003885	741.421	695.384	569.513	836.702	674.607	625.683	-0.082088	0.73216	0.99972	alphaTub84D	3R	+	7530753	7532732	1980	protein_coding	NA	957	554	580	1085	585	544	24.8161	17.8797	17.5175	32.3315	16.7789	15.3142
FBgn0003886	1.54947	1.25521	2.94576	0	6.91905	1.15015	-0.073392	0.80032	0.99972	alphaTub85E	3R	-	9731221	9733250	1560	protein_coding	NA	2	1	3	0	6	1	0.0658252	0.0409629	0.115002	0	0.218423	0.0357303
FBgn0003887	9306.89	8546.69	9118.1	14756	7194.66	9083.91	-0.17093	0.54675	0.99972	betaTub56D	2R	-	19447319	19451600	1869	protein_coding	NA	12013	6809	9286	19135	6239	7898	374.04	263.862	336.757	684.65	214.865	266.967
FBgn0003888	1685.82	3223.37	1369.78	1070.36	2904.85	1797.69	0.08862	0.79821	0.99972	betaTub60D	2R	+	24305881	24313099	2518	protein_coding	NA	2176	2568	1395	1388	2519	1563	44.3877	65.1969	33.1436	32.5362	56.8351	34.6129
FBgn0003889	1.54947	0	2.94576	4.62693	0	0	-0.0068999	0.97552	0.99972	betaTub85D	3R	-	9408383	9410282	1841	protein_coding	NA	2	0	3	6	0	0	0.055778	0	0.0974488	0.192291	0	0
FBgn0003890	843.686	1266.5	814.993	460.379	1125.5	1062.74	0.11203	0.72937	0.99972	betaTub97EF	3R	-	27967008	27988384	1869	protein_coding	NA	1089	1009	830	597	976	924	32.8708	37.9055	29.1798	20.7076	32.585	30.2782
FBgn0003891	4495.79	4055.57	3995.43	3818.76	4767.23	4012.89	-0.0053414	0.97976	0.99972	tud	2R	+	21183322	21192913	8830	protein_coding	NA	5803	3231	4069	4952	4134	3489	33.7579	23.3931	27.5697	33.1038	26.5998	22.0343
FBgn0003892	77.4735	105.437	79.5355	63.2347	113.011	81.6609	0.021242	0.94549	0.99972	ptc	2R	+	8649649	8665223	5521	protein_coding	NA	100	84	81	82	98	71	0.92997	0.972247	0.877357	0.876308	1.00805	0.716807
FBgn0003896	24.7915	45.1874	31.4214	14.6519	69.1905	41.4055	-0.18003	0.63857	0.99972	tup	2L	-	18859507	18881261	3314	protein_coding	NA	32	36	32	19	60	36	0.557894	0.781146	0.649791	0.380653	1.15701	0.681364
FBgn0003900	0.774735	0	1.96384	13.1096	12.6849	2.30031	-0.78501	0.026077	0.6378	twi	2R	+	22985374	23048325	2388	protein_coding	NA	1	0	2	17	11	2	0.0242645	0	0.0565228	0.474017	0.295222	0.0526837
FBgn0003916	0.774735	5.02082	0	2.31346	1.15318	3.45046	-0.052561	0.85699	0.99972	snRNA:U1:21D	2L	-	901491	901654	164	snRNA	NA	1	4	0	3	1	3	0.313071	1.55859	0	1.07929	0.34628	1.01962
FBgn0003922	3.87367	0	0	2.31346	0	1.15015	0.01474	0.94471	NA	snRNA:U2:38ABa	2L	-	19815614	19815805	192	snRNA	NA	5	0	0	3	0	1	1.33707	0	0	0.921893	0	0.290309
FBgn0003930	8.52208	11.2968	4.9096	5.39808	3.45953	12.6517	0.085394	0.82498	0.99972	snRNA:U4:39B	2L	-	21215036	21215178	143	snRNA	NA	11	9	5	7	3	11	3.94951	4.02181	2.09095	2.88817	1.1914	4.28764
FBgn0003933	1.54947	0	0	6.16923	1.15318	0	-0.17807	0.43097	0.99972	snRNA:U5:14B	X	-	16254008	16254117	110	snRNA	NA	2	0	0	8	1	0	0.933521	0	0	4.29099	0.516273	0
FBgn0003934	0.774735	6.27603	4.9096	2.31346	10.3786	2.30031	-0.092742	0.79041	0.99972	snRNA:U5:23D	2L	+	3048701	3048831	131	snRNA	NA	1	5	5	3	9	2	0.391936	2.43901	2.28248	1.35117	3.9016	0.850982
FBgn0003935	1.54947	0	0	0	0	0	0.066928	0.64315	NA	snRNA:U5:34A	2L	+	13244848	13244974	127	snRNA	NA	2	0	0	0	0	0	0.808562	0	0	0	0	0
FBgn0003938	1.54947	0	0	0	0	0	0.066928	0.64315	NA	snRNA:U5:63BC	3L	+	3090801	3090923	123	snRNA	NA	2	0	0	0	0	0	0.834856	0	0	0	0	0
FBgn0003941	13072.1	18949.8	17129.6	10336.6	15902.3	16626.6	0.17068	0.52349	0.99972	RpL40	2L	+	4227699	4228561	659	protein_coding	NA	16873	15097	17445	13404	13790	14456	1390.56	1548.52	1674.53	1269.42	1257.04	1293.37
FBgn0003942	26619.9	38076.7	32818.7	18297.2	30056.4	33347.6	0.21701	0.43681	0.99972	RpS27A	2L	+	10408352	10410456	592	protein_coding	NA	34360	30335	33423	23727	26064	28994	2980.01	3274.44	3376.24	2364.73	2500.29	2729.91
FBgn0003943	8570.12	10529.9	8315.87	8224.36	10655.3	8951.64	-0.01971	0.93053	0.99972	Ubi-p63E	3L	-	3899259	3903184	3138	protein_coding	NA	11062	8389	8469	10665	9240	7783	214.003	201.987	190.827	237.094	197.717	163.459
FBgn0003944	634.508	809.607	620.573	225.177	574.281	598.08	0.43767	0.17941	0.99972	Ubx	3R	-	16656623	16734426	4282	protein_coding	NA	819	645	632	292	498	520	11.3527	11.1277	10.2036	4.65128	7.63537	7.82517
FBgn0003950	69.7261	21.3385	47.1321	41.6423	3.45953	20.7028	0.50818	0.19324	0.99972	unc	X	-	21111414	21116914	4775	protein_coding	NA	90	17	48	54	3	18	1.00128	0.235392	0.621983	0.690371	0.0369166	0.217401
FBgn0003961	660.074	446.853	223.878	326.969	92.254	258.785	0.64936	0.077508	0.99972	Uro	2L	+	7780085	7781415	1262	protein_coding	NA	852	356	228	424	80	225	34.6631	18.0263	10.804	19.8229	3.6	9.93768
FBgn0003963	598.095	930.107	618.609	496.623	943.297	688.942	0.01001	0.97303	0.99972	ush	2L	+	476220	540560	6706	protein_coding	NA	772	741	630	644	818	599	8.18445	9.77729	7.7792	7.84571	9.59203	6.89404
FBgn0003964	1245.77	1007.93	1194.01	1585.49	756.483	1126	-0.0074462	0.97941	0.99972	usp	X	-	2038798	2042311	3038	protein_coding	NA	1608	803	1216	2056	656	979	29.7301	18.478	26.1859	43.6825	13.4153	19.6503
FBgn0003965	1308.53	2570.66	1464.04	714.86	1738.99	2671.81	0.042446	0.90506	0.99972	v	X	+	10923972	10925631	1305	protein_coding	NA	1689	2048	1491	927	1508	2323	66.4517	100.285	68.3244	41.9112	65.624	99.2203
FBgn0003969	549.287	440.577	444.809	633.889	548.911	480.764	-0.19147	0.42049	0.99972	vap	X	-	15999951	16005812	4457	protein_coding	NA	709	351	453	822	476	418	9.69445	5.97327	7.21435	12.9158	7.19895	6.2048
FBgn0003975	5.42314	5.02082	6.87343	3.08462	24.2167	4.60061	-0.30881	0.41127	0.99972	vg	2R	+	12884632	12899385	3463	protein_coding	NA	7	4	7	4	21	4	0.103784	0.0738112	0.12088	0.0681504	0.344381	0.0643827
FBgn0003977	348.631	279.911	369.202	434.931	277.915	341.596	-0.069825	0.79203	0.99972	vir	2R	-	23360192	23366355	5867	protein_coding	NA	450	223	376	564	241	297	3.93807	2.42887	3.83249	5.67184	2.33277	2.82164
FBgn0003978	219.25	153.135	175.764	234.431	104.939	162.172	0.10056	0.74959	0.99972	vls	2L	-	20064261	20065679	1310	protein_coding	NA	283	122	179	304	91	141	11.0918	5.95118	8.17129	13.6919	3.94495	5.99942
FBgn0003979	12672.3	7282.7	3455.37	5297.83	4228.69	1128.3	0.70531	0.06267	0.97815	Vm26Aa	2L	-	5959596	5960340	745	protein_coding	NA	16357	5802	3519	6870	3667	981	1211.87	535.007	303.665	584.903	300.504	78.9037
FBgn0003980	6890.49	3903.69	2011.95	3161.73	2463.18	649.837	0.64179	0.089912	0.99972	Vm26Ab	2L	+	5957004	5957639	636	protein_coding	NA	8894	3110	2049	4100	2136	565	723.693	314.953	194.188	383.367	192.24	49.9092
FBgn0003983	12587.1	6779.36	3501.52	6060.5	4255.22	1198.46	0.61088	0.10768	0.99972	Vm34Ca	2L	-	13411141	13411631	491	protein_coding	NA	16247	5401	3566	7859	3690	1042	1698.94	702.923	434.319	944.379	426.792	118.29
FBgn0003984	59.6546	53.9738	30.4395	37.0154	55.3524	35.6548	0.12823	0.71104	0.99972	vn	3L	-	5813338	5845664	5239	protein_coding	NA	77	43	31	48	48	31	0.863013	0.599823	0.404679	0.618218	0.595049	0.377193
FBgn0003996	219.25	261.083	193.438	115.673	201.806	192.076	0.33877	0.24283	0.99972	w	X	-	2790599	2796466	2352	protein_coding	NA	283	208	197	150	175	167	6.17783	5.6512	5.00885	3.76283	4.22545	3.95768
FBgn0003997	137.128	168.198	102.12	99.4789	109.552	80.5107	0.40702	0.1644	0.99972	hid	3L	-	18167745	18185641	4018	protein_coding	NA	177	134	104	129	95	70	2.92778	2.75866	2.00364	2.45205	1.7381	1.25701
FBgn0004003	107.688	51.4634	61.8609	81.7424	251.392	126.517	-0.72034	0.046625	0.86012	wbl	2R	+	19249395	19250917	1319	protein_coding	NA	139	41	63	106	218	110	6.28237	2.30632	3.31643	5.50539	10.8981	5.39729
FBgn0004009	0	5.02082	3.92768	7.71154	20.7572	12.6517	-0.72629	0.051306	0.90101	wg	2L	+	7307159	7316265	2919	protein_coding	NA	0	4	4	10	18	11	0	0.0875671	0.0819473	0.202128	0.350195	0.210049
FBgn0004028	524.496	800.821	532.2	293.81	1721.69	629.134	-0.32746	0.38193	0.99972	wupA	X	-	18105568	18116922	1978	protein_coding	NA	677	638	542	381	1493	547	29.2098	34.2601	27.2371	18.8903	71.25	25.6214
FBgn0004045	527887	691414	559473	229656	476016	565704	0.39046	0.20656	0.99972	Yp1	X	+	10053811	10055498	1611	protein_coding	NA	681378	550837	569775	297808	412787	491851	21989	22124.2	21416.2	11044	14734.2	17231.6
FBgn0004047	904409	1.02257e+06	750301	405392	715692	1.04404e+06	0.24548	0.4312	0.99972	Yp3	X	+	13759546	13761547	1868	protein_coding	NA	1167379	814666	764117	525695	620627	907742	35719.6	31024.3	27231.8	18484.3	21004.4	30153.1
FBgn0004049	1008.7	523.421	775.716	1284.74	517.776	659.038	-0.071041	0.8311	0.99972	yrt	3R	-	13428867	13434984	4464	protein_coding	NA	1302	417	790	1666	449	573	15.8298	6.31001	11.187	23.2763	6.03806	7.56302
FBgn0004050	557.809	431.791	525.327	798.916	352.872	484.215	-0.090971	0.76541	0.99972	z	X	+	2447769	2450550	2599	protein_coding	NA	720	344	535	1036	306	421	14.9424	8.88533	12.9319	24.707	7.02415	9.48515
FBgn0004053	6.97261	2.51041	0	28.5327	1.15318	1.15015	-0.31498	0.31006	0.99972	zen	3R	-	6752864	6754194	1267	protein_coding	NA	9	2	0	37	1	1	0.364714	0.100871	0	1.723	0.0448224	0.0439932
FBgn0004054	2.3242	0	0	10.7962	0	0	-0.14706	0.47955	0.99972	zen2	3R	-	6743135	6744136	1002	protein_coding	NA	3	0	0	14	0	0	0.164212	0	0	0.880615	0	0
FBgn0004055	264.959	223.427	239.588	293.039	282.528	262.235	-0.18256	0.42556	0.99972	uzip	2R	+	25012062	25031737	4114	protein_coding	NA	342	178	244	380	245	228	5.33887	3.45837	4.43644	6.8168	4.23033	3.86396
FBgn0004057	1025.75	1724.65	1122.33	1014.84	1870.45	2085.23	-0.29039	0.34708	0.99972	Zw	X	+	19667252	19672353	2512	protein_coding	NA	1324	1374	1143	1316	1622	1813	34.2291	44.2102	34.4172	39.0964	46.3814	50.8839
FBgn0004066	2177.01	2358.53	2391.96	2712.15	2351.32	2174.94	-0.058773	0.77831	0.99972	Prosalpha4	X	+	16276270	16277587	1176	protein_coding	NA	2810	1879	2436	3517	2039	1891	122.683	102.102	123.874	176.452	98.465	89.6285
FBgn0004087	182.837	284.932	196.384	162.714	174.129	240.382	0.16898	0.55515	0.99972	Dhfr	3R	+	16481167	16481878	662	protein_coding	NA	236	227	200	211	151	209	19.2641	23.0616	19.0147	19.7921	13.6332	18.5207
FBgn0004101	328.488	214.64	259.227	420.279	200.652	232.331	-0.07175	0.81917	0.99972	bs	2R	+	24342861	24376473	4791	protein_coding	NA	424	171	264	545	174	202	7.1966	3.61231	5.219	10.63	3.2666	3.7221
FBgn0004102	3.09894	2.51041	0	6.16923	2.30635	0	-0.091937	0.74068	0.99972	oc	X	-	8630159	8650681	5041	protein_coding	NA	4	2	0	8	2	0	0.0432095	0.0268891	0	0.0993077	0.0238965	0
FBgn0004103	2954.06	2849.32	2829.89	3192.58	2748.02	2878.83	-0.028804	0.88355	0.99972	Pp1-87B	3R	-	12423621	12425917	2203	protein_coding	NA	3813	2270	2882	4140	2383	2503	88.8667	65.8455	78.2327	110.878	61.4301	63.3298
FBgn0004106	674.794	343.926	620.573	1423.55	247.933	521.02	-0.26585	0.4804	0.99972	Cdk1	2L	-	10384739	10386262	1082	protein_coding	NA	871	274	632	1846	215	453	41.3312	16.1822	34.93	100.662	11.2845	23.3363
FBgn0004107	544.639	248.531	508.634	992.476	184.508	408.304	-0.18111	0.63014	0.99972	Cdk2	3R	+	20735623	20738414	2299	protein_coding	NA	703	198	518	1287	160	355	23.6531	8.29135	20.2994	49.7605	5.95439	12.9669
FBgn0004108	248.69	625.092	340.726	642.372	900.63	581.978	-0.63028	0.05183	0.90414	Nrt	3L	+	16766072	16777465	4281	protein_coding	NA	321	498	347	833	781	506	4.55411	8.79338	5.7339	13.5805	12.2556	7.79334
FBgn0004110	2.3242	1.25521	0	7.71154	1.15318	2.30031	-0.29036	0.34064	0.99972	tin	3R	+	21378977	21381970	1664	protein_coding	NA	3	1	0	10	1	2	0.0925667	0.0384027	0	0.354574	0.0341286	0.0669944
FBgn0004117	442.374	779.483	631.374	283.014	1738.99	645.236	-0.33301	0.37636	0.99972	Tm2	3R	+	15310193	15315197	2613	protein_coding	NA	571	621	643	367	1508	561	19.3258	26.159	25.3475	14.2739	56.4531	20.6129
FBgn0004118	18.5936	25.1041	15.7107	10.025	14.9913	9.20123	0.48335	0.20473	0.99972	nAChRbeta2	3R	-	24509228	24515106	4018	protein_coding	NA	24	20	16	13	13	8	0.417004	0.432501	0.323796	0.259565	0.249838	0.150902
FBgn0004132	445.473	519.655	589.151	435.702	428.981	487.665	0.18131	0.4301	0.99972	boca	2R	-	7565873	7566738	704	protein_coding	NA	575	414	600	565	372	424	41.9355	37.5788	50.9668	47.3518	30.0084	33.5703
FBgn0004133	155.722	222.171	129.613	133.41	269.843	266.836	-0.3141	0.32842	0.99972	blow	2R	-	7580488	7587079	2848	protein_coding	NA	201	177	132	173	234	232	4.11979	4.51524	3.15119	4.07473	5.30493	5.16228
FBgn0004167	4065.81	5614.53	4295.9	2671.28	5103.95	4074.99	0.20151	0.47489	0.99972	kst	3L	+	3336860	3368133	14454	protein_coding	NA	5248	4473	4375	3464	4426	3543	20.0485	21.2674	19.4665	15.2069	18.7018	14.6938
FBgn0004168	6.19788	5.02082	2.94576	0.771154	3.45953	4.60061	0.21284	0.55103	0.99972	5-HT1A	2R	+	19067155	19121958	5019	protein_coding	NA	8	4	3	1	3	4	0.0818389	0.0509281	0.0357448	0.0117556	0.033945	0.0444227
FBgn0004169	975.391	1768.58	1124.3	646.998	3921.95	1364.08	-0.38979	0.30111	0.99972	up	X	-	13593474	13602578	2530	protein_coding	NA	1259	1409	1145	839	3401	1186	42.0297	58.5423	44.5203	32.1859	125.58	42.9823
FBgn0004177	4443.1	3892.39	4383.29	5460.54	4061.48	4186.56	-0.098343	0.66215	0.99972	mts	2L	+	7827650	7833576	3102	protein_coding	NA	5735	3101	4464	7081	3522	3640	132.638	89.2614	120.249	188.192	90.0966	91.3924
FBgn0004179	1492.14	1137.22	1430.66	2002.69	1270.8	1391.69	-0.17517	0.50079	0.99972	Csp	3L	+	22267382	22273745	3081	protein_coding	NA	1926	906	1457	2597	1102	1210	44.5441	26.0789	39.2478	69.0207	28.1904	30.3804
FBgn0004183	7.74735	8.78644	5.89151	6.94039	0	1.15015	0.37466	0.28332	0.99972	snRNA:U1:82Eb	3R	-	4947933	4948096	164	snRNA	NA	10	7	6	9	0	1	3.13071	2.72753	2.18784	3.23787	0	0.339874
FBgn0004186	6.97261	10.0416	5.89151	1.54231	0	2.30031	0.70765	0.050479	0.89523	snRNA:U1:95Cb	3R	+	23827870	23828033	164	snRNA	NA	9	8	6	2	0	2	2.81764	3.11717	2.18784	0.719527	0	0.679748
FBgn0004187	2.3242	0	2.94576	3.85577	0	2.30031	-0.032023	0.90676	0.99972	snRNA:U1:95Cc	3R	+	23826334	23826497	164	snRNA	NA	3	0	3	5	0	2	0.939213	0	1.09392	1.79882	0	0.679748
FBgn0004190	0	2.51041	2.94576	0	0	0	0.15999	0.36108	NA	snRNA:U6:96Ac	3R	+	24557215	24557321	107	snRNA	NA	0	2	3	0	0	0	0	1.19443	1.67667	0	0	0
FBgn0004191	7.74735	11.2968	13.7469	0.771154	0	3.45046	0.88627	0.01681	0.49906	snRNA:U2:34ABa	2L	-	13211925	13212116	192	snRNA	NA	10	9	14	1	0	3	2.67415	2.99541	4.3605	0.307298	0	0.870927
FBgn0004192	2.3242	0	1.96384	1.54231	0	2.30031	0.0231	0.92774	0.99972	snRNA:U2:34ABb	2L	+	13215839	13216030	192	snRNA	NA	3	0	2	2	0	2	0.802245	0	0.622928	0.614596	0	0.580618
FBgn0004197	110.787	188.281	87.3908	127.24	288.294	177.124	-0.45954	0.17815	0.99972	Ser	3R	-	27172090	27194267	5831	protein_coding	NA	143	150	89	165	250	154	1.28923	1.68311	0.934556	1.70943	2.49298	1.50726
FBgn0004198	249.465	356.478	206.203	140.35	401.305	169.073	0.1406	0.68616	0.99972	ct	X	+	7609148	7678859	11777	protein_coding	NA	322	284	210	182	348	147	1.5284	1.67775	1.16097	0.992716	1.82702	0.757482
FBgn0004227	1070.68	947.68	1130.19	1382.68	815.295	826.96	0.048998	0.85713	0.99972	nonA	X	+	16361569	16371547	8029	protein_coding	NA	1382	755	1151	1793	707	719	15.8918	10.8054	15.4157	23.693	8.99228	8.97572
FBgn0004228	30.9894	18.8281	62.8428	53.9808	77.2627	26.4535	-0.29547	0.43747	0.99972	mex1	3L	-	15517424	15519592	1219	protein_coding	NA	40	15	64	70	67	23	2.48037	1.15765	4.62231	4.98802	4.59533	1.54831
FBgn0004237	2380.76	1866.49	2509.79	3600.52	1926.96	2252	-0.17202	0.54268	0.99972	Hrb87F	3R	-	13656846	13660531	2759	protein_coding	NA	3073	1487	2556	4669	1671	1958	74.8123	45.0556	72.4758	130.619	44.9958	51.7485
FBgn0004240	583.375	2222.97	390.804	316.944	576.588	1452.64	0.24562	0.52761	0.99972	Dpt	2R	+	18865765	18866260	496	protein_coding	NA	753	1771	398	411	500	1263	77.9471	228.166	47.9855	48.8901	57.248	141.933
FBgn0004242	16.2694	16.3177	19.6384	13.1096	26.523	14.952	-0.032738	0.931	0.99972	Syt1	2L	-	2772327	2799979	9454	protein_coding	NA	21	13	20	17	23	13	0.218086	0.168027	0.241914	0.202876	0.264193	0.146564
FBgn0004244	1.54947	1.25521	0.981919	1.54231	0	2.30031	-0.0035486	0.98956	NA	Rdl	3L	-	9145838	9182149	8994	protein_coding	NA	2	1	1	2	0	2	0.0147243	0.0091629	0.00857486	0.0169203	0	0.0159849
FBgn0004359	282.778	170.708	230.751	406.398	176.436	220.829	-0.18099	0.57823	0.99972	T48	3R	+	26881734	26910997	2449	protein_coding	NA	365	136	235	527	153	192	7.66167	3.55302	5.7454	12.712	3.55228	4.37529
FBgn0004360	61.9788	40.1666	54.0056	60.9212	133.768	109.265	-0.71753	0.032447	0.72705	Wnt2	2R	+	9494166	9503188	2240	protein_coding	NA	80	32	55	79	116	95	1.83534	0.913702	1.46964	2.0827	2.94354	2.36606
FBgn0004362	3418.13	1472.36	2888.81	6139.93	1735.53	2315.26	-0.26655	0.46321	0.99972	HmgD	2R	+	21701458	21716727	1965	protein_coding	NA	4412	1173	2942	7962	1505	2013	180.501	59.7268	140.187	374.317	68.1027	89.405
FBgn0004363	7182.57	8605.69	7640.31	7822.59	6889.07	8187.94	0.03034	0.88393	0.99972	porin	2L	-	10847227	10850848	2858	protein_coding	NA	9271	6856	7781	10144	5974	7119	288.489	265.523	282.007	362.732	205.614	240.49
FBgn0004364	446.247	459.405	332.871	249.854	546.605	521.02	-0.070499	0.82005	0.99972	18w	2R	+	20111511	20116932	5422	protein_coding	NA	576	366	339	324	474	453	5.45444	4.31357	3.73895	3.52571	4.96467	4.65694
FBgn0004367	161.92	114.224	134.523	162.714	109.552	102.364	0.10866	0.71121	0.99972	mei-41	X	+	16391698	16399850	7899	protein_coding	NA	209	91	137	211	95	89	1.3585	0.73618	1.03719	1.57605	0.683004	0.628029
FBgn0004368	1104	955.211	1183.21	1159.82	1553.33	1178.91	-0.23653	0.31329	0.99972	Ptp4E	X	+	4939128	4955916	7229	protein_coding	NA	1425	761	1205	1504	1347	1025	11.6338	7.73246	11.4581	14.11	12.1635	9.08456
FBgn0004369	628.31	695.384	656.904	722.572	829.133	716.546	-0.18053	0.38943	0.99972	Ptp99A	3R	+	29377646	29487131	9139	protein_coding	NA	811	554	669	937	719	623	7.0018	5.95287	6.72724	9.29613	6.86598	5.83918
FBgn0004370	919.61	1031.78	861.143	949.291	1314.62	754.501	-0.088531	0.73798	0.99972	Ptp10D	X	+	11622015	11677338	8708	protein_coding	NA	1187	822	877	1231	1140	656	7.93554	6.83952	6.82885	9.45709	8.42977	4.76107
FBgn0004372	1.54947	3.76562	6.87343	0	0	0	0.44827	0.096824	0.99972	aly	3L	-	3024129	3026521	2267	protein_coding	NA	2	3	7	0	0	0	0.0508102	0.0948571	0.207129	0	0	0
FBgn0004373	2325.75	1928	2191.64	2724.49	1804.72	1743.63	0.034166	0.89348	0.99972	fwd	3L	-	305393	319884	7436	protein_coding	NA	3002	1536	2232	3533	1565	1516	26.4789	16.862	22.9301	35.8102	15.2682	14.5165
FBgn0004374	345.532	277.4	393.75	462.693	192.58	289.839	0.082361	0.79411	0.99972	neb	2L	+	20075757	20089698	3592	protein_coding	NA	446	221	401	600	167	252	6.37508	3.93161	6.67601	9.85543	2.64029	3.91044
FBgn0004378	491.182	268.614	538.092	962.401	177.589	313.992	-0.10375	0.78342	0.99972	Klp61F	3L	-	1241568	1245910	3871	protein_coding	NA	634	214	548	1248	154	273	8.40917	3.53269	8.46577	19.0218	2.25928	3.93098
FBgn0004379	553.935	240.999	509.616	973.197	128.002	432.458	-0.13932	0.7165	0.99972	Klp67A	3L	-	9362636	9367046	3086	protein_coding	NA	715	192	519	1262	111	376	12.3981	4.1436	10.4819	25.1467	2.12891	7.07801
FBgn0004380	386.593	450.619	435.972	350.104	415.143	371.5	0.14886	0.50414	0.99972	Klp64D	3L	-	5356864	5359392	2529	protein_coding	NA	499	359	444	454	360	323	10.1307	9.07111	10.4989	10.5917	8.08399	7.11894
FBgn0004381	489.632	515.889	475.249	607.67	480.874	491.116	-0.086247	0.70028	0.99972	Klp68D	3L	+	11795614	11798875	2998	protein_coding	NA	632	411	484	788	417	427	10.8708	8.79857	9.69639	15.5755	7.93348	7.97343
FBgn0004387	1327.9	1728.42	1117.42	1465.96	2044.58	1473.35	-0.22286	0.39643	0.99972	Klp98A	3R	-	27547775	27559145	5530	protein_coding	NA	1714	1377	1138	1901	1773	1281	16.0912	16.0894	12.4435	20.5085	18.4108	13.0558
FBgn0004390	1107.87	1061.9	867.035	1489.87	1123.19	994.883	-0.22046	0.37736	0.99972	RasGAP1	3L	-	9839093	9855285	5434	protein_coding	NA	1430	846	883	1932	974	865	14.5706	10.7285	10.4791	22.6216	10.9771	9.56827
FBgn0004391	632.184	382.838	571.477	812.025	342.493	462.362	-0.021897	0.94572	0.99972	shtd	X	-	15455544	15462441	6481	protein_coding	NA	816	305	582	1053	297	402	6.4645	3.00727	5.37019	9.58621	2.60247	3.45737
FBgn0004394	2.3242	3.76562	3.92768	0	0	3.45046	0.23415	0.41292	0.99972	pdm2	2L	+	12657165	12686306	4624	protein_coding	NA	3	3	4	0	0	3	0.0446079	0.0555187	0.0692743	0	0	0.0484269
FBgn0004395	450.121	412.963	448.737	558.316	392.08	338.145	0.021109	0.93578	0.99972	unk	3R	-	23149653	23157862	6328	protein_coding	NA	581	329	457	724	340	294	6.8592	4.83416	6.28399	9.82222	4.43978	3.76808
FBgn0004396	1296.13	1289.1	893.546	577.595	1350.37	1160.5	0.13808	0.65813	0.99972	CrebA	3L	+	15535395	15553214	4498	protein_coding	NA	1673	1027	910	749	1171	1009	22.346	17.0727	14.1569	11.4963	17.3	14.6308
FBgn0004397	1837.67	2637.19	1925.54	1971.84	2930.22	2379.67	-0.16302	0.52771	0.99972	Vinc	X	-	2214347	2222567	3933	protein_coding	NA	2372	2101	1961	2557	2541	2069	32.1933	35.4899	30.9992	39.88	38.1452	30.485
FBgn0004400	162.694	52.7186	148.27	226.719	25.3699	79.3606	0.070224	0.85712	0.99972	rhi	2R	-	17628491	17633516	1570	protein_coding	NA	210	42	151	294	22	69	6.86762	1.70948	5.75157	11.0486	0.795783	2.44969
FBgn0004401	3882.2	2836.76	3708.71	5586.24	2449.34	3043.31	-0.070801	0.81787	0.99972	Pep	3L	-	17638103	17645036	2792	protein_coding	NA	5011	2260	3777	7244	2124	2646	97.4927	54.7248	85.5887	161.957	45.7074	55.8872
FBgn0004403	11388.6	18821.8	15756.9	9451.27	16388.9	18009.1	0.056321	0.84877	0.99972	RpS14a	X	+	7933742	7934677	877	protein_coding	NA	14700	14995	16047	12256	14212	15658	993.095	1260.8	1262.67	951.472	1061.97	1148.38
FBgn0004404	2923.07	4753.46	4154.5	2239.43	4033.81	4416.59	0.12033	0.6874	0.99972	RpS14b	X	+	7934898	7935792	597	protein_coding	NA	3773	3787	4231	2904	3498	3840	335.155	418.68	437.748	296.435	343.688	370.31
FBgn0004406	389.692	223.427	326.979	520.529	136.075	271.436	0.012338	0.9724	0.99972	tam	2L	-	13823980	13827772	3679	protein_coding	NA	503	178	333	675	118	236	7.01981	3.09175	5.41282	10.8252	1.82148	3.57556
FBgn0004419	9116.31	3953.9	8044.86	14857.1	3755.89	6056.71	-0.15198	0.67758	0.99972	me31B	2L	+	10239341	10242172	1845	protein_coding	NA	11767	3150	8193	19266	3257	5266	366.158	121.995	296.94	688.919	112.1	177.893
FBgn0004425	9.29682	1.25521	4.9096	558.316	36.9016	32.2043	-1.5211	NA	NA	LysB	3L	+	1207371	1207981	611	protein_coding	NA	12	1	5	724	32	28	1.12227	0.116397	0.544636	77.8085	3.31016	2.84281
FBgn0004427	3.09894	8.78644	4.9096	926.156	74.9564	94.3126	-2.0623	NA	NA	LysD	3L	-	1210717	1211196	480	protein_coding	NA	4	7	5	1201	65	82	0.427864	0.931905	0.622928	147.626	7.69031	9.52213
FBgn0004428	74.3745	35.1457	81.4993	42.4135	28.8294	14.952	0.7491	0.043427	0.82626	LysE	3L	+	1212827	1213406	580	protein_coding	NA	96	28	83	55	25	13	8.49826	3.08493	8.55774	5.59494	2.44784	1.24933
FBgn0004429	28.6652	7.53123	44.1864	45.4981	142.994	157.571	-1.1732	0.0024346	0.13952	LysP	3L	-	1218082	1218696	615	protein_coding	NA	37	6	45	59	124	137	3.08897	0.623435	4.37569	5.66028	11.4503	12.4167
FBgn0004430	3.87367	0	0	2.31346	11.5318	9.20123	-0.47762	0.13862	0.99972	LysS	3L	+	1227747	1228238	492	protein_coding	NA	5	0	0	3	10	8	0.521785	0	0	0.359763	1.15427	0.90633
FBgn0004431	24.7915	22.5937	0.981919	39.3289	108.398	26.4535	-0.76783	0.04714	0.86259	LysX	3L	-	1194739	1195302	564	protein_coding	NA	32	18	1	51	94	23	2.91312	2.03943	0.10603	5.33521	9.465	2.27306
FBgn0004432	11765.9	13209.8	11765.4	14589.5	15399.5	18131	-0.35918	0.085243	0.99972	Cyp1	X	-	16317673	16320370	1227	protein_coding	NA	15187	10524	11982	18919	13354	15764	635.498	548.089	583.974	909.734	618.071	716.116
FBgn0004435	226.223	399.155	210.131	162.714	457.81	368.049	-0.17824	0.60545	0.99972	Galphaq	2R	+	12612740	12623197	6910	protein_coding	NA	292	318	214	211	397	320	4.70422	6.37617	4.01551	3.90626	7.07425	5.59667
FBgn0004436	1394.52	1521.31	1546.52	1401.96	1480.68	1487.15	0.028152	0.88602	0.99972	Ubc6	3R	-	4948755	4952682	2166	protein_coding	NA	1800	1212	1575	1818	1284	1293	55.8758	46.8255	56.9448	64.8514	44.0861	43.5737
FBgn0004449	3391.79	7488.55	3969.9	3128.57	8790.65	5325.21	-0.15834	0.64657	0.99972	Ten-m	3L	-	22293044	22407863	13109	protein_coding	NA	4378	5966	4043	4057	7623	4630	18.8639	31.9939	20.29	20.0879	36.3302	21.6577
FBgn0004456	949.05	1360.64	917.112	561.4	1423.02	1045.49	0.07199	0.82118	0.99972	mew	X	-	13214409	13258490	5204	protein_coding	NA	1225	1084	934	728	1234	909	14.7332	16.2262	13.0837	10.0616	16.4158	11.8686
FBgn0004462	504.352	481.999	498.815	533.639	501.631	430.157	0.017128	0.93744	0.99972	Pk17E	X	+	18788464	18806057	2277	protein_coding	NA	651	384	508	692	435	374	16.9841	12.4687	15.4365	20.7463	12.5527	10.5927
FBgn0004463	285.102	283.676	259.227	372.468	237.554	272.586	-0.082725	0.75063	0.99972	RpIII128	2R	+	12039041	12042623	3532	protein_coding	NA	368	226	264	483	206	237	5.34951	4.08886	4.46984	8.06839	3.31221	3.74015
FBgn0004465	471.039	438.067	485.068	633.889	501.631	533.671	-0.23713	0.28749	0.99972	Su(P)	3L	-	16610662	16612199	1412	protein_coding	NA	608	349	494	822	435	464	22.1083	15.7945	20.9219	34.3477	17.4955	18.3166
FBgn0004507	17645.4	26194.9	17333.8	6922.65	10181.4	9607.23	1.0352	0.00010099	0.013573	GlyP	2L	+	2130813	2137296	3144	protein_coding	NA	22776	20869	17653	8977	8829	8353	387.476	441.873	349.791	175.498	166.136	154.271
FBgn0004509	1788.86	1931.76	1648.64	1678.03	2260.22	2104.78	-0.15487	0.49049	0.99972	Fur1	3R	-	25347431	25473058	9128	protein_coding	NA	2309	1539	1679	2176	1960	1830	27.9935	23.222	23.7086	30.3156	26.283	24.0857
FBgn0004510	289.751	208.364	336.798	456.523	265.23	225.43	-0.1469	0.63739	0.99972	Ets97D	3R	-	26910775	26912886	1858	protein_coding	NA	374	166	343	592	230	196	10.3351	5.70923	11.0397	18.7991	7.02998	5.87993
FBgn0004511	1.54947	7.53123	0	1.54231	3.45953	3.45046	0.014441	0.96304	0.99972	dy	X	-	11769769	11778784	4075	protein_coding	NA	2	6	0	2	3	3	0.0251993	0.0940889	0	0.0289576	0.0418086	0.0410351
FBgn0004512	982.364	2825.47	1548.49	1066.51	2654.61	2077.18	-0.082633	0.81358	0.99972	Mdr49	2R	-	12940323	12946347	4396	protein_coding	NA	1268	2251	1577	1383	2302	1806	16.5574	36.5828	23.9843	20.7524	33.2479	25.6015
FBgn0004513	51.9072	52.7186	34.3672	39.3289	77.2627	26.4535	-0.02636	0.94222	0.99972	Mdr65	3L	-	6240500	6245746	4135	protein_coding	NA	67	42	35	51	67	23	0.831929	0.649066	0.506176	0.727705	0.920177	0.310037
FBgn0004514	25.5663	6.27603	10.8011	6.16923	4.6127	9.20123	0.50502	0.1946	0.99972	Oct-TyrR	3L	+	22035003	22065279	3682	protein_coding	NA	33	5	11	8	4	8	0.460544	0.086847	0.178802	0.128298	0.061745	0.121205
FBgn0004516	3.87367	1.25521	3.92768	1.54231	0	1.15015	0.29716	0.32724	0.99972	Gad1	3L	-	4074077	4088744	3684	protein_coding	NA	5	1	4	2	0	1	0.0816275	0.0203186	0.0760586	0.0375206	0	0.0177232
FBgn0004552	0.774735	5.02082	0	2.31346	11.5318	0	-0.18233	0.51184	0.99972	Akh	3L	+	4141467	4142070	536	protein_coding	NA	1	4	0	3	10	0	0.0957904	0.476881	0	0.33023	1.05951	0
FBgn0004554	0	7.53123	0	0	3.45953	1.15015	0.061637	0.78375	0.99972	Edg91	3R	-	17610856	17611511	604	protein_coding	NA	0	6	0	0	3	1	0	0.672653	0	0	0.298895	0.0977883
FBgn0004556	366.45	267.359	329.925	556.773	212.184	251.884	-0.064758	0.84534	0.99972	Dbp73D	3L	-	16728496	16730818	2209	protein_coding	NA	473	213	336	722	184	219	10.9939	6.16167	9.09604	19.2842	4.73036	5.52599
FBgn0004567	3.87367	10.0416	7.85535	1.54231	9.2254	11.5015	-0.0086175	0.9818	0.99972	slp2	2L	+	3836840	3839185	2346	protein_coding	NA	5	8	8	2	8	10	0.109428	0.21791	0.203925	0.0502994	0.193657	0.237593
FBgn0004569	96.0671	115.479	87.3908	110.275	117.624	57.5077	0.049113	0.87737	0.99972	aos	3L	-	16470386	16483650	2822	protein_coding	NA	124	92	89	143	102	50	2.25606	2.08327	1.886	2.98978	2.05265	0.987585
FBgn0004573	7.74735	20.0833	12.7649	5.39808	14.9913	25.3034	-0.082472	0.83283	0.99972	5-HT7	3R	-	30968236	31016875	4486	protein_coding	NA	10	16	13	7	13	22	0.128488	0.255864	0.194548	0.103355	0.184752	0.306873
FBgn0004574	1008.7	1510.01	1079.13	936.181	1634.05	1479.1	-0.1441	0.61053	0.99972	Rop	3L	-	4136359	4138996	2638	protein_coding	NA	1302	1203	1099	1214	1417	1286	27.5782	31.7138	27.1128	29.5493	33.1978	29.5713
FBgn0004575	20.9178	21.3385	20.6203	10.025	39.208	32.2043	-0.21295	0.57893	0.99972	Syn	3R	+	10190689	10222442	5803	protein_coding	NA	27	17	21	13	34	28	0.23889	0.187202	0.216409	0.132176	0.332735	0.268947
FBgn0004577	19.3684	26.3593	15.7107	15.4231	101.479	47.1563	-0.77229	0.046976	0.86259	Pxd	3R	+	17014576	17027987	2630	protein_coding	NA	25	21	16	20	88	41	0.524557	0.548403	0.391016	0.482233	2.0423	0.933924
FBgn0004580	14.72	22.5937	23.5661	3.08462	51.8929	25.3034	-0.17315	0.65575	0.99972	Cbp53E	2R	+	16973927	16996057	2754	protein_coding	NA	19	18	24	4	45	22	0.475173	0.560271	0.699087	0.114956	1.24479	0.597304
FBgn0004581	10.8463	8.78644	21.6022	6.16923	3.45953	12.6517	0.41607	0.28602	0.99972	bgcn	2R	-	23853270	23858921	4159	protein_coding	NA	14	7	22	8	3	11	0.173124	0.107735	0.316865	0.113682	0.0410332	0.147672
FBgn0004583	731.35	591.202	598.971	484.285	636.553	675.14	0.088516	0.71572	0.99972	ex	2L	+	431227	448701	6672	protein_coding	NA	944	471	610	628	552	587	7.3851	4.58599	5.55823	5.6457	4.77649	4.98537
FBgn0004584	639.931	400.41	527.291	1069.59	363.25	532.521	-0.2457	0.46677	0.99972	Rrp1	2L	-	2969773	2972508	2551	protein_coding	NA	826	319	537	1387	315	463	16.8896	8.11818	12.789	32.5905	7.12419	10.2777
FBgn0004587	2387.73	1842.64	2156.29	3047.6	1892.36	2030.02	-0.11002	0.67422	0.99972	B52	3R	+	13661311	13666891	4313	protein_coding	NA	3082	1468	2196	3952	1641	1765	65.4159	38.7798	54.2882	96.3922	38.5252	40.6697
FBgn0004595	173.541	284.932	110.957	114.902	267.537	223.13	-0.064434	0.85333	0.99972	pros	3R	+	11328480	11407627	24892	protein_coding	NA	224	227	113	149	232	194	0.79339	1.00067	0.466165	0.606455	0.908891	0.745959
FBgn0004597	206.079	153.135	199.33	315.402	172.976	173.673	-0.20152	0.50638	0.99972	CycC	3R	-	14889004	14890205	1142	protein_coding	NA	266	122	203	409	150	151	11.9592	6.82666	10.6301	21.1309	7.45928	7.37009
FBgn0004598	3164.79	2560.62	2997.8	4230.55	2327.11	3177.87	-0.13691	0.60978	0.99972	Fur2	X	+	16373086	16381782	6474	protein_coding	NA	4085	2040	3053	5486	2018	2763	37.2803	23.171	32.4516	57.533	20.3701	27.3743
FBgn0004606	1171.4	1314.2	925.95	946.977	1639.81	1306.57	-0.1633	0.5492	0.99972	zfh1	3R	+	30765926	30789202	6915	protein_coding	NA	1512	1047	943	1228	1422	1136	14.0256	12.0877	10.1883	13.0901	14.59	11.4399
FBgn0004607	29.4399	48.953	24.548	28.5327	62.2715	40.2554	-0.24028	0.50772	0.99972	zfh2	4	+	501810	540874	12424	protein_coding	NA	38	39	25	37	54	35	0.180353	0.230373	0.138198	0.201797	0.283478	0.180336
FBgn0004611	1286.06	1620.47	1348.17	1086.56	1770.12	1787.34	-0.10931	0.68051	0.99972	Plc21C	2L	+	305935	355566	7774	protein_coding	NA	1660	1291	1373	1409	1535	1554	14.0482	13.5978	13.5334	13.7024	14.3683	14.2771
FBgn0004618	0	1.25521	0	3.08462	0	0	-0.057125	0.7204	NA	gl	3R	-	18367927	18372738	3399	protein_coding	NA	0	1	0	4	0	0	0	0.0203834	0	0.0752806	0	0
FBgn0004620	18.5936	42.677	29.4576	7.71154	99.1731	49.4566	-0.37827	0.33294	0.99972	GluRIIA	2L	+	5555072	5558994	3253	protein_coding	NA	24	34	30	10	86	43	0.378804	0.667897	0.551501	0.181375	1.50136	0.736794
FBgn0004622	44.9346	31.3801	19.6384	3.08462	8.07223	1.15015	1.4372	0.0002343	0.025992	TkR99D	3R	-	29950796	29969447	2880	protein_coding	NA	58	25	20	4	7	1	1.03472	0.555091	0.415574	0.082003	0.138127	0.0193674
FBgn0004635	82.1219	163.177	101.138	86.3693	275.609	147.22	-0.38984	0.27594	0.99972	rho	3L	+	1463811	1468944	3000	protein_coding	NA	106	130	103	112	239	128	1.96762	3.00335	2.22687	2.38906	4.90702	2.5794
FBgn0004636	2524.86	2899.52	2654.13	2966.63	3193.14	3351.55	-0.21908	0.27273	0.99972	R	3L	-	1859115	1862239	3012	protein_coding	NA	3259	2310	2703	3847	2769	2914	60.364	53.2517	58.3125	81.8822	56.7285	58.5947
FBgn0004638	1429.39	1862.72	1340.32	1203	1920.04	1658.52	-0.039688	0.88001	0.99972	drk	2R	-	13495222	13502841	2946	protein_coding	NA	1845	1484	1365	1560	1665	1442	44.3696	44.4172	38.2335	43.1109	44.2882	37.6469
FBgn0004643	836.714	615.051	795.355	1340.27	417.449	740.699	-0.11593	0.73024	0.99972	Zw10	X	+	2604197	2606824	2567	protein_coding	NA	1080	490	810	1738	362	644	21.6015	12.1979	18.8698	39.947	8.00856	13.9837
FBgn0004644	46.4841	66.5259	50.0779	42.4135	121.083	101.214	-0.49737	0.15875	0.99972	hh	3R	-	23128169	23141906	2370	protein_coding	NA	60	53	51	55	105	88	1.29984	1.42903	1.28686	1.36923	2.51601	2.06965
FBgn0004646	1490.59	1837.62	1423.78	956.231	1977.7	2279.6	-0.10784	0.72604	0.99972	ogre	X	-	6973620	6991318	3940	protein_coding	NA	1924	1464	1450	1240	1715	1982	43.3459	41.0499	38.0481	32.1024	42.7358	48.4754
FBgn0004647	395.115	466.936	602.898	739.537	630.787	312.842	-0.16006	0.61239	0.99972	N	X	+	3134870	3172221	10150	protein_coding	NA	510	372	614	959	547	272	2.65006	2.40579	3.71601	5.72636	3.14382	1.53437
FBgn0004648	2643.4	3253.49	2445.96	2334.28	3459.53	3443.56	-0.12939	0.60913	0.99972	svr	X	+	496446	509072	8583	protein_coding	NA	3412	2592	2491	3027	3000	2994	37.3847	35.3466	31.7893	38.1128	36.3572	35.6132
FBgn0004649	6355.93	2430.08	5670.58	11779.4	1229.28	6485.72	-0.24663	0.5237	0.99972	yl	X	+	14193214	14199958	6351	protein_coding	NA	8204	1936	5775	15275	1066	5639	66.7232	19.5968	54.7048	142.76	9.58944	49.7884
FBgn0004650	653.102	268.614	428.117	1219.97	172.976	486.515	-0.28702	0.45338	0.99972	fs(1)N	X	+	1322513	1329438	6581	protein_coding	NA	843	214	436	1582	150	423	6.57692	2.07796	3.9619	14.1832	1.29441	3.5827
FBgn0004652	92.9682	56.4842	41.2406	55.5231	84.1818	33.3545	0.10066	0.78044	0.99972	fru	3R	-	18414273	18545586	18433	protein_coding	NA	120	45	42	72	73	29	1.25765	0.586975	0.512685	0.867133	0.846228	0.329953
FBgn0004654	4096.02	7164.71	4557.09	2269.51	4717.64	4959.46	0.32035	0.31347	0.99972	Pgd	X	+	2145136	2148566	1895	protein_coding	NA	5287	5708	4641	2943	4091	4312	152.331	204.687	155.745	97.4413	130.375	134.875
FBgn0004655	1681.17	1207.51	1747.82	2702.12	733.419	1154.75	0.010127	0.97697	0.99972	wapl	X	-	2149936	2158983	7054	protein_coding	NA	2170	962	1780	3504	636	1004	17.8037	9.82323	17.0096	33.0361	5.77156	8.94252
FBgn0004656	3517.3	2391.17	3421.01	4613.05	2219.86	2615.45	-0.015028	0.96037	0.99972	fs(1)h	X	-	8037808	8061436	15685	protein_coding	NA	4540	1905	3484	5982	1925	2274	26.9698	14.0846	24.1059	40.8359	12.6485	14.6652
FBgn0004657	2694.53	4375.65	2853.46	2676.68	4491.62	3188.23	-0.051884	0.85588	0.99972	mys	X	+	8061645	8070237	4482	protein_coding	NA	3478	3486	2906	3471	3895	2772	42.8542	53.4587	41.7043	49.1464	53.083	37.0793
FBgn0004666	130.155	212.13	104.083	97.1654	179.895	41.4055	0.32039	0.3869	0.99972	sim	3R	+	13057755	13078124	3547	protein_coding	NA	168	169	106	126	156	36	2.86189	3.58309	2.10316	2.46654	2.93936	0.665765
FBgn0004687	1643.21	2005.82	1701.67	1583.18	2188.73	1638.97	-0.014509	0.95108	0.99972	Mlc-c	X	-	5619136	5622539	1399	protein_coding	NA	2121	1598	1733	2053	1898	1425	85.4117	80.0906	81.2826	95.0035	84.5392	62.2969
FBgn0004698	1386.78	799.566	1045.74	2535.56	551.218	1027.09	-0.23633	0.51742	0.99972	mus210	2R	+	15311510	15318239	4830	protein_coding	NA	1790	637	1065	3288	478	893	26.6469	11.8021	18.4657	56.247	7.87058	14.4318
FBgn0004777	41.0609	27.6145	96.2281	38.5577	156.832	180.574	-0.68138	0.077531	0.99972	Ccp84Ag	3R	+	6686728	6688039	1097	protein_coding	NA	53	22	98	50	136	157	2.4806	1.28154	5.3423	2.68921	7.04051	7.97728
FBgn0004779	0	1.25521	0.981919	0.771154	4.6127	3.45046	-0.29669	0.3054	0.99972	Ccp84Ae	3R	-	6690887	6691758	754	protein_coding	NA	0	1	1	1	4	3	0	0.0847507	0.0793118	0.0782509	0.301273	0.221774
FBgn0004795	1662.58	802.076	1442.44	2976.66	1111.66	1429.64	-0.36921	0.28075	0.99972	retn	2R	+	23632610	23654820	4477	protein_coding	NA	2146	639	1469	3860	964	1243	28.508	10.5649	22.7291	58.9248	14.1644	17.926
FBgn0004797	574.079	947.68	762.951	757.274	1499.13	1709.13	-0.6349	0.043001	0.82172	mdy	2L	+	16816660	16826964	2689	protein_coding	NA	741	755	777	982	1300	1486	17.3883	22.0503	21.2365	26.4804	33.7418	37.8559
FBgn0004811	492.731	464.426	571.477	721.8	499.325	526.77	-0.17208	0.49007	0.99972	fs(2)ltoPP43	2L	-	19792773	19795851	2435	protein_coding	NA	636	370	582	936	433	458	20.9324	15.1563	22.3104	35.4007	15.7629	16.3645
FBgn0004828	4673.98	5130.02	4938.07	4758.02	5363.42	5057.22	-0.039323	0.83955	0.99972	His3.3B	X	-	9152523	9156669	2552	protein_coding	NA	6033	4087	5029	6170	4651	4397	188.646	159.055	183.154	221.704	160.859	149.261
FBgn0004832	182.837	101.672	140.414	189.704	96.8667	131.117	0.019406	0.95169	0.99972	Xpac	X	-	4102955	4104197	1178	protein_coding	NA	236	81	143	246	84	114	10.2862	4.39394	7.25938	12.3211	4.04954	5.39413
FBgn0004837	348.631	215.895	308.323	410.254	144.147	217.379	0.1321	0.69609	0.99972	Su(H)	2L	+	15039488	15043334	2950	protein_coding	NA	450	172	314	532	125	189	8.2753	3.93666	6.72548	11.2423	2.54253	3.77318
FBgn0004838	9887.94	8011.98	9077.84	11915.9	8014.57	8656.06	-0.074535	0.75914	0.99972	Hrb27C	2L	+	6920704	6932057	8693	protein_coding	NA	12763	6383	9245	15452	6950	7526	167.51	104.266	141.324	233.049	100.892	107.233
FBgn0004839	30.2147	20.0833	22.5841	26.2192	78.4159	27.6037	-0.52643	0.16448	0.99972	otk	2R	-	12001473	12019846	4769	protein_coding	NA	39	16	23	34	68	24	0.424238	0.216617	0.291404	0.425008	0.818161	0.28342
FBgn0004841	1.54947	0	0	0.771154	0	1.15015	-0.012127	0.945	NA	TkR86C	3R	-	10737592	10751228	3223	protein_coding	NA	2	0	0	1	0	1	0.0349158	0	0	0.0200616	0	0.0189525
FBgn0004842	5.42314	13.8073	4.9096	3.85577	24.2167	4.60061	-0.16264	0.66678	0.99972	RYa-R	3R	+	26996980	27057935	2302	protein_coding	NA	7	11	5	5	21	4	0.17371	0.33974	0.144517	0.142584	0.576409	0.107761
FBgn0004852	1339.52	1688.25	1188.12	579.137	1514.12	1351.43	0.22892	0.47653	0.99972	Ac76E	3L	+	19939287	19977960	5320	protein_coding	NA	1729	1345	1210	751	1313	1175	16.7087	16.177	13.6193	8.3399	14.0345	12.3271
FBgn0004854	6.19788	0	5.89151	6.94039	4.6127	4.60061	-0.11357	0.74895	0.99972	B-H2	X	+	17314581	17324175	3142	protein_coding	NA	8	0	6	9	4	4	0.131566	0	0.114928	0.170087	0.0727611	0.0714149
FBgn0004855	322.29	391.624	336.798	412.568	319.429	358.848	-0.051013	0.82909	0.99972	RpII15	3R	+	14309089	14310178	1035	protein_coding	NA	416	312	343	535	277	312	26.3691	24.6141	25.3232	38.9699	19.4208	21.47
FBgn0004856	993.21	953.956	1047.71	1251.58	852.196	1004.08	-0.048604	0.83656	0.99972	Bx42	X	-	9103870	9106604	2403	protein_coding	NA	1282	760	1067	1623	739	873	30.2077	22.288	29.283	43.9463	19.2601	22.3315
FBgn0004858	161.145	224.682	170.854	130.325	373.629	204.727	-0.26197	0.43619	0.99972	elB	2L	-	14390628	14409549	3326	protein_coding	NA	208	179	174	169	324	178	3.21187	3.44014	3.12944	2.99886	5.53382	2.98394
FBgn0004859	315.317	419.239	368.22	207.441	367.863	356.548	0.2057	0.47033	0.99972	ci	4	-	47710	57041	5651	protein_coding	NA	407	334	375	269	319	310	4.1777	4.26695	4.48329	3.17299	3.62175	3.45446
FBgn0004860	244.041	299.994	281.811	323.114	213.337	243.833	0.067963	0.79455	0.99972	ph-d	X	-	2115727	2123286	6126	protein_coding	NA	315	239	287	419	185	212	2.73151	2.57939	2.89865	4.17522	1.77439	1.99573
FBgn0004861	277.355	233.468	199.33	151.917	244.473	147.22	0.32489	0.26109	0.99972	ph-p	X	-	2126210	2138371	6887	protein_coding	NA	358	186	203	197	212	128	3.14098	2.03106	2.07444	1.9862	2.05733	1.21918
FBgn0004862	7.74735	3.76562	2.94576	0.771154	21.9103	3.45046	-0.22336	0.52244	0.99972	bap	3R	+	21388880	21390449	1449	protein_coding	NA	10	3	3	1	19	3	0.354339	0.132302	0.123812	0.0407185	0.744658	0.115402
FBgn0004863	0.774735	2.51041	0	0	0	0	0.096049	0.51092	NA	C15	3R	+	21499986	21512814	1856	protein_coding	NA	1	2	0	0	0	0	0.0276636	0.06886	0	0	0	0
FBgn0004864	1172.17	808.352	992.72	1439.75	613.489	800.507	0.046954	0.8806	0.99972	hop	X	-	11360930	11368098	5055	protein_coding	NA	1513	644	1011	1867	532	696	15.3676	8.14103	11.9602	21.7913	5.97671	7.67449
FBgn0004865	38.7367	55.229	45.1683	30.8462	117.624	93.1624	-0.52742	0.15254	0.99972	Eip78C	3L	+	21226609	21266503	5878	protein_coding	NA	50	44	46	40	102	81	0.611671	0.669929	0.655432	0.562318	1.38017	1.07574
FBgn0004867	16424.4	25967.7	22596.9	12468.8	15521.7	20034.5	0.3752	0.16691	0.99972	RpS2	2L	-	9896265	9897552	1208	protein_coding	NA	21200	20688	23013	16169	13460	17419	1074.52	1305.04	1358.54	941.747	754.584	958.463
FBgn0004868	4901.75	5804.07	5274.87	4765.73	5958.46	6547.82	-0.10181	0.65153	0.99972	Gdi	2L	-	9491176	9494876	2501	protein_coding	NA	6327	4624	5372	6180	5167	5693	148.064	134.678	146.423	166.193	133.744	144.633
FBgn0004870	34.8631	31.3801	42.2225	26.2192	46.127	32.2043	0.047019	0.89136	0.99972	bab1	3L	-	1036369	1101089	5340	protein_coding	NA	45	25	43	34	40	28	0.433483	0.299728	0.482448	0.376368	0.426191	0.292814
FBgn0004872	780.933	382.838	655.922	1058.02	254.852	395.653	0.060607	0.8689	0.99972	piwi	2L	-	10982205	10987420	3073	protein_coding	NA	1008	305	668	1372	221	344	17.1316	6.45155	13.2231	26.7956	4.15445	6.34701
FBgn0004875	1874.86	1179.89	1589.73	2776.16	743.798	1215.71	-0.020329	0.95398	0.99972	enc	3L	+	3818679	3842326	9058	protein_coding	NA	2420	940	1619	3600	645	1057	16.5053	7.97927	12.861	28.2152	4.86577	7.82631
FBgn0004876	1193.87	1006.67	1082.07	1766.71	1007.87	984.531	-0.16647	0.55209	0.99972	cdi	3R	-	19044882	19094270	6526	protein_coding	NA	1541	802	1102	2291	874	856	12.9834	8.40982	10.814	22.1811	8.14481	7.82948
FBgn0004878	11.621	5.02082	13.7469	10.7962	42.6675	21.8529	-0.65409	0.094082	0.99972	cas	3R	-	5712975	5716805	3151	protein_coding	NA	15	4	14	14	37	19	0.25689	0.0852596	0.279258	0.275522	0.700877	0.353251
FBgn0004880	3.87367	1.25521	7.85535	0.771154	0	2.30031	0.38734	0.21856	0.99972	scrt	3L	+	3983896	3994003	9075	protein_coding	NA	5	1	8	1	0	2	0.0403772	0.0100507	0.0752451	0.00927983	0	0.0175336
FBgn0004882	1493.69	552.29	1135.1	2130.7	340.187	817.759	-0.029337	0.93871	0.99972	orb	3R	-	23260610	23280856	9551	protein_coding	NA	1928	440	1156	2763	295	711	23.6763	6.72492	16.5343	38.9907	4.00695	9.47875
FBgn0004885	2749.53	4004.1	3415.11	1267.01	2332.87	3238.83	0.45612	0.14708	0.99972	tok	3R	+	24719697	24749125	5411	protein_coding	NA	3549	3190	3478	1643	2023	2816	34.213	38.274	39.0515	18.2011	21.5708	29.4709
FBgn0004888	3824.09	5909.51	4716.16	3502.58	4936.74	5964.7	0.0039068	0.98869	0.99972	Scsalpha	3L	+	3814211	3818383	1479	protein_coding	NA	4936	4708	4803	4542	4281	5186	185.665	220.404	210.421	196.325	178.108	211.769
FBgn0004889	2592.26	1902.89	2323.22	3380.74	2094.17	2097.88	-0.13049	0.62926	0.99972	tws	3R	-	10126129	10139772	5059	protein_coding	NA	3346	1516	2366	4384	1816	1824	57.7271	32.5523	47.5435	86.9157	34.6541	34.1628
FBgn0004892	15.4947	32.6353	15.7107	13.1096	24.2167	8.05107	0.27051	0.48558	0.99972	sob	2L	-	3578013	3580769	2611	protein_coding	NA	20	26	16	17	21	7	0.393287	0.636328	0.366456	0.384152	0.456756	0.149435
FBgn0004893	238.618	242.255	227.805	173.51	351.718	217.379	-0.053883	0.85525	0.99972	bowl	2L	+	3771700	3784121	4280	protein_coding	NA	308	193	232	225	305	189	4.53899	3.53992	3.98216	3.81035	4.97157	3.02375
FBgn0004895	0.774735	0	0	0	1.15318	0	-0.0011701	0.99354	NA	fd64A	3L	+	4018878	4021279	1414	protein_coding	NA	1	0	0	0	1	0	0.0368583	0	0	0	0.0407681	0
FBgn0004896	0	3.76562	0	0	0	1.15015	0.070101	0.66766	NA	fd59A	2R	+	22868159	22870706	2228	protein_coding	NA	0	3	0	0	0	1	0	0.0860441	0	0	0	0.0250176
FBgn0004897	2.3242	0	6.87343	3.08462	27.6762	19.5526	-0.69746	0.054628	0.93727	fd96Ca	3R	+	25082684	25084878	2195	protein_coding	NA	3	0	7	4	24	17	0.0790308	0	0.214781	0.12109	0.699312	0.486182
FBgn0004898	0.774735	0	1.96384	7.71154	8.07223	13.8018	-0.95049	0.010045	0.36191	fd96Cb	3R	+	25095012	25096099	1088	protein_coding	NA	1	0	2	10	7	12	0.0471909	0	0.109928	0.54229	0.365377	0.614772
FBgn0004901	474.138	267.359	505.688	720.258	194.887	336.995	-0.0046374	0.98968	0.99972	Prat	3R	-	7909598	7911779	2105	protein_coding	NA	612	213	515	934	169	293	14.9346	6.46917	14.6376	26.1916	4.56155	7.76218
FBgn0004903	629.859	375.306	523.363	732.597	446.279	438.208	-0.067357	0.81941	0.99972	Rb97D	3R	-	26872129	26875742	3286	protein_coding	NA	813	299	533	950	387	381	15.8958	7.27598	12.1378	21.3447	8.36928	8.08708
FBgn0004907	6714.63	9052.54	7291.73	5785.97	9409.91	8783.72	-0.049148	0.85145	0.99972	14-3-3zeta	2R	+	10099677	10109687	3637	protein_coding	NA	8667	7212	7426	7503	8160	7637	184.035	190.596	183.657	183.079	191.649	176.047
FBgn0004908	88.3198	41.4218	99.1738	88.6827	111.858	71.3095	-0.1811	0.59213	0.99972	Arl2	3R	+	8341100	8341872	656	protein_coding	NA	114	33	101	115	97	62	8.92253	3.21459	9.20718	10.3432	8.3973	5.26805
FBgn0004910	128.606	112.968	99.1738	61.6923	395.539	104.664	-0.42956	0.2623	0.99972	Eip63F-1	3L	-	3909973	3935617	3545	protein_coding	NA	166	90	101	80	343	91	4.63966	3.13075	3.28792	2.56946	10.6037	2.76117
FBgn0004911	1.54947	7.53123	1.96384	1.54231	4.6127	1.15015	0.13638	0.68364	0.99972	Eip63F-2	3L	+	3934718	3935992	1275	lincRNA	NA	2	6	2	2	4	1	0.0805391	0.300716	0.0938056	0.0925509	0.178165	0.0437171
FBgn0004913	1231.05	676.556	1166.52	2018.88	595.038	879.867	-0.13229	0.70764	0.99972	Gnf1	3R	+	4906622	4910081	3274	protein_coding	NA	1589	539	1188	2618	516	765	25.1728	10.6273	21.9203	47.6597	9.04154	13.1566
FBgn0004914	1736.18	2042.22	1748.8	1503.75	2094.17	1972.51	-0.0099904	0.96569	0.99972	Hnf4	2L	-	8687226	8709611	5377	protein_coding	NA	2241	1627	1781	1950	1816	1715	35.2624	31.8629	32.6404	35.2597	31.6061	29.296
FBgn0004915	410.609	316.312	412.406	518.987	289.447	416.356	-0.089146	0.74971	0.99972	TfIIB	2L	+	10431338	10433116	1604	protein_coding	NA	530	252	420	673	251	362	18.0572	10.6857	16.6665	26.3489	9.45872	13.3893
FBgn0004919	27.8905	32.6353	26.5118	30.8462	53.0461	57.5077	-0.50999	0.13937	0.99972	gol	2R	-	25072627	25084347	4156	protein_coding	NA	36	26	27	40	46	50	0.615099	0.552896	0.537314	0.785373	0.869331	0.927443
FBgn0004921	2832.43	3837.16	3083.23	2418.34	4782.22	4017.49	-0.16988	0.55169	0.99972	Ggamma1	2R	+	8901404	8904791	2773	protein_coding	NA	3656	3057	3140	3136	4147	3493	125.982	131.106	126.024	124.18	158.059	130.669
FBgn0004924	1971.7	1601.64	1840.12	3070.74	1429.94	1484.85	-0.11789	0.69987	0.99972	Top1	X	+	15319479	15328029	6250	protein_coding	NA	2545	1276	1874	3982	1240	1291	31.8551	19.8779	27.3201	57.2752	17.1671	17.5425
FBgn0004926	1821.4	1959.38	1976.6	1643.33	1848.54	1919.61	0.083147	0.67946	0.99972	eIF-2beta	3L	-	12525093	12526731	1128	protein_coding	NA	2351	1561	2013	2131	1603	1669	107.011	88.4318	106.719	111.464	80.7042	82.4725
FBgn0004956	0.774735	2.51041	1.96384	37.0154	6.91905	0	-0.61512	0.06414	0.98752	os	X	-	18305354	18309291	3125	protein_coding	NA	1	2	2	48	6	0	0.0200405	0.0498845	0.0466831	1.10541	0.132998	0
FBgn0004957	162.694	124.265	124.704	254.481	123.39	185.175	-0.36665	0.23268	0.99972	por	X	-	18377521	18379854	2334	protein_coding	NA	210	99	127	330	107	161	5.02665	2.94933	3.54067	9.0771	2.83288	4.1837
FBgn0004959	1225.63	1763.56	2322.24	30.075	19.604	21.8529	4.9485	1.3928e-59	7.8622e-56	phm	X	+	18685766	18688433	2203	protein_coding	NA	1582	1405	2365	39	17	19	38.6789	42.7535	67.3474	1.09574	0.459729	0.504308
FBgn0005198	962.995	853.54	844.45	960.858	872.953	899.42	-0.035654	0.86222	0.99972	gig	3L	+	20129181	20139010	5795	protein_coding	NA	1243	680	860	1246	757	782	11.0206	7.50361	8.88084	12.6948	7.42359	7.52688
FBgn0005278	5574.22	6156.78	5285.67	4371.67	5353.04	6906.67	0.029474	0.90418	0.99972	Sam-S	2L	+	106903	114432	3559	protein_coding	NA	7195	4905	5383	5669	4642	6005	168.993	143.385	147.259	153.009	120.594	153.117
FBgn0005322	619.788	626.347	751.168	855.981	606.57	608.431	-0.047348	0.84827	0.99972	nmd	2L	-	10302173	10303947	1719	protein_coding	NA	800	499	765	1110	526	529	29.4022	22.8254	32.7472	46.88	21.3826	21.1067
FBgn0005355	429.203	394.134	442.846	597.645	382.854	427.857	-0.13609	0.59406	0.99972	Su(fu)	3R	-	12689873	12691468	1596	protein_coding	NA	554	314	451	775	332	372	17.8223	12.5722	16.8987	28.6503	11.8135	12.9919
FBgn0005386	1042.79	643.92	921.04	1775.2	477.414	584.278	-0.084483	0.8149	0.99972	ash1	3L	-	19590773	19598755	7615	protein_coding	NA	1346	513	938	2302	414	508	9.08367	4.30885	7.37295	17.8524	3.09031	3.72182
FBgn0005390	343.208	159.411	266.1	946.206	137.228	309.391	-0.51254	0.18105	0.99972	fs(1)M3	X	-	5958207	5964247	5690	protein_coding	NA	443	127	271	1227	119	269	3.99741	1.42628	2.84817	12.7231	1.1877	2.63513
FBgn0005391	939485	1.28856e+06	1.01455e+06	353905	765611	1.03564e+06	0.45814	0.15883	0.99972	Yp2	X	-	10050951	10052636	1618	protein_coding	NA	1212654	1026575	1033231	458929	663916	900433	39282.1	41388.2	38983.2	17083.5	23787.9	31665.3
FBgn0005411	1007.93	920.065	1058.51	1212.25	922.54	978.781	-0.055066	0.80597	0.99972	U2af50	X	-	16356696	16359039	1646	protein_coding	NA	1301	733	1078	1572	800	851	46.7447	32.7783	45.1124	64.9054	31.7929	33.194
FBgn0005427	529.144	356.478	489.978	535.181	359.791	323.193	0.14788	0.60024	0.99972	ewg	X	-	268509	279718	6973	protein_coding	NA	683	284	499	694	312	281	9.50602	4.91954	8.08911	11.0997	4.80306	4.2458
FBgn0005533	11507.9	17608	15087.2	8348.52	12644.6	15911.2	0.21877	0.44499	0.99972	RpS17	3L	-	9428795	9429821	535	protein_coding	NA	14854	14028	15365	10826	10965	13834	1425.53	1675.55	1717.46	1193.92	1163.93	1441.3
FBgn0005536	1286.06	1177.38	1201.87	1730.47	1369.97	1174.31	-0.19994	0.39512	0.99972	Mbs	3L	+	16051959	16082026	7797	protein_coding	NA	1660	938	1224	2244	1188	1021	19.428	13.6631	16.6849	30.1798	15.3787	12.9724
FBgn0005558	4.64841	3.76562	10.8011	0.771154	3.45953	3.45046	0.41255	0.25491	0.99972	ey	4	+	697689	721173	3720	protein_coding	NA	6	3	11	1	3	3	0.0985798	0.061346	0.2105	0.0188804	0.0545184	0.0535097
FBgn0005561	22.4673	3.76562	19.6384	16.9654	26.523	17.2523	-0.19883	0.61054	0.99972	sv	4	+	1088798	1113317	5213	protein_coding	NA	29	3	20	22	23	15	0.397482	0.0511762	0.31928	0.34651	0.348684	0.223195
FBgn0005564	49.583	61.5051	29.4576	27.7616	99.1731	54.0572	-0.23269	0.53375	0.99972	Shal	3L	-	19566851	19584568	4606	protein_coding	NA	64	49	30	36	86	47	1.09024	1.03889	0.595233	0.704725	1.62042	0.869193
FBgn0005585	8119.22	10829.9	8457.27	7439.33	10256.3	10023.6	-0.014609	0.95197	0.99972	Crc	3R	-	9628691	9630851	1677	protein_coding	NA	10480	8628	8613	9647	8894	8715	346.256	354.792	331.446	366.27	325.026	312.592
FBgn0005586	16.2694	30.1249	23.5661	10.7962	40.3611	19.5526	-0.0063474	0.98687	0.99972	Rab3	2R	-	10721335	10729203	3757	protein_coding	NA	21	24	24	14	35	17	0.286989	0.408211	0.382014	0.219861	0.529052	0.252214
FBgn0005592	32.5389	45.1874	33.3853	26.2192	80.7223	36.8049	-0.24428	0.50813	0.99972	btl	3L	+	14075772	14083229	3968	protein_coding	NA	42	36	34	34	70	32	0.563185	0.600803	0.53101	0.523907	1.03821	0.465829
FBgn0005593	23000.3	32061.7	28845.8	16948.4	25444.8	29042.5	0.20045	0.4553	0.99972	RpL7	2L	+	10201004	10202321	1167	protein_coding	NA	29688	25543	29377	21978	22065	25251	1478.46	1583.17	1703.95	1257.74	1215.39	1365.15
FBgn0005596	1145.06	553.546	1080.11	1893.95	479.721	688.942	-0.094803	0.79588	0.99972	yem	3R	-	29118330	29122879	4239	protein_coding	NA	1478	441	1100	2456	416	599	17.9018	6.64798	15.5181	34.1842	5.57316	7.87635
FBgn0005612	785.581	1110.86	779.644	496.623	1112.81	1017.89	0.021641	0.94439	0.99972	Sox14	2R	+	23978801	23985177	3579	protein_coding	NA	1014	885	794	644	965	885	16.7135	18.1552	15.243	12.198	17.593	15.8361
FBgn0005613	7.74735	1.25521	8.83727	7.71154	10.3786	8.05107	-0.21075	0.58339	0.99972	Sox15	2R	-	14201390	14212413	3651	protein_coding	NA	10	1	9	10	9	7	0.140629	0.0175026	0.147414	0.161603	0.139992	0.106868
FBgn0005614	0	3.76562	10.8011	10.025	2.30635	3.45046	-0.034088	0.91755	0.99972	trpl	2R	+	9753697	9765518	3893	protein_coding	NA	0	3	11	13	2	3	0	0.0503827	0.172881	0.201581	0.0298502	0.0439469
FBgn0005616	109.238	105.437	100.156	61.6923	146.453	81.6609	0.096756	0.76749	0.99972	msl-2	2L	-	3462218	3466112	3843	protein_coding	NA	141	84	102	80	127	71	1.91672	1.42117	1.61496	1.24969	1.90954	1.04779
FBgn0005617	1500.66	798.311	1246.06	2152.29	463.576	729.197	0.055095	0.88164	0.99972	msl-1	2L	-	18683720	18688800	5021	protein_coding	NA	1937	636	1269	2791	402	634	22.6595	9.2599	17.2904	37.5193	5.20154	8.05166
FBgn0005619	13.1705	7.53123	9.81919	2.31346	1.15318	6.90092	0.59685	0.11735	0.99972	Hdc	2R	+	10237988	10246077	3826	protein_coding	NA	17	6	10	3	1	6	0.256417	0.112636	0.175679	0.0519987	0.0166833	0.0982479
FBgn0005624	371.873	232.213	396.695	575.281	111.858	169.073	0.14148	0.70716	0.99972	Psc	2R	-	12965997	12980994	6332	protein_coding	NA	480	185	404	746	97	147	4.10544	1.96933	4.02459	7.33215	0.917646	1.36493
FBgn0005626	639.931	1295.37	627.446	780.408	1760.9	1621.72	-0.52869	0.11571	0.99972	ple	3L	-	6713356	6719525	3806	protein_coding	NA	826	1032	639	1012	1527	1410	12.9298	20.1058	11.6503	18.204	26.4385	23.9611
FBgn0005630	8384.18	5147.6	7576.49	12264.4	3947.32	5943.99	-0.052264	0.87772	0.99972	lola	2R	-	10481894	10543291	25208	protein_coding	NA	10822	4101	7716	15904	3423	5168	181.998	85.8376	151.138	307.355	63.6725	94.3534
FBgn0005631	124.732	136.817	120.776	85.5981	299.826	181.724	-0.41154	0.23715	0.99972	robo	2R	-	22692524	22700970	6791	protein_coding	NA	161	109	123	111	260	158	1.263	1.06422	1.12384	1.00063	2.25598	1.34558
FBgn0005632	3401.86	2907.06	3255.06	4029.28	2751.48	2899.54	-0.015747	0.9477	0.99972	faf	3R	+	31777020	31790681	10488	protein_coding	NA	4391	2316	3315	5225	2386	2521	24.3361	15.9755	21.399	33.2773	14.6266	15.1683
FBgn0005636	30.9894	46.4426	13.7469	30.8462	41.5143	81.6609	-0.46434	0.2224	0.99972	nvy	2R	+	24275734	24291084	3502	protein_coding	NA	40	37	14	40	36	71	0.629404	0.724602	0.256578	0.723275	0.626552	1.21284
FBgn0005638	91.4187	16.3177	31.4214	13.8808	19.604	3.45046	0.89399	0.02205	0.57397	slbo	2R	-	24331522	24334307	2786	protein_coding	NA	118	13	32	18	17	3	2.25728	0.309511	0.712979	0.395686	0.359698	0.0623018
FBgn0005640	720.503	567.353	730.548	1073.45	711.509	676.29	-0.2483	0.35056	0.99972	Eip63E	3L	+	3515751	3610521	6544	protein_coding	NA	930	452	744	1392	617	588	14.3998	8.71041	13.4174	24.7677	10.5668	9.88381
FBgn0005642	825.093	562.332	841.505	1271.63	284.834	618.783	0.023968	0.9469	0.99972	wdn	3R	-	28807983	28811337	3184	protein_coding	NA	1065	448	857	1649	247	538	17.1737	8.99124	16.096	30.5568	4.40551	9.41826
FBgn0005648	690.289	497.061	630.392	1022.55	553.524	537.122	-0.1796	0.54611	0.99972	Pabp2	2R	+	8131431	8134374	2138	protein_coding	NA	891	396	642	1326	480	467	28.1695	15.582	23.6406	48.1746	16.7852	16.0285
FBgn0005649	3033.86	2253.09	3028.24	4489.66	1956.94	2603.95	-0.099333	0.74534	0.99972	Rox8	3R	-	24043056	24048265	4010	protein_coding	NA	3916	1795	3084	5822	1697	2264	61.1316	34.8751	56.0737	104.441	29.3015	38.3684
FBgn0005655	1280.64	572.374	1207.76	2745.31	381.701	1122.55	-0.28654	0.4533	0.99972	PCNA	2R	-	20261754	20262883	1070	protein_coding	NA	1653	456	1230	3560	331	976	82.0803	28.1812	71.1367	203.138	18.1794	52.6127
FBgn0005658	1.54947	0	0	0	4.6127	1.15015	-0.13276	0.53397	NA	Ets65A	3L	+	6097617	6123913	4922	protein_coding	NA	2	0	0	0	4	1	0.0271157	0	0	0	0.0599842	0.0147186
FBgn0005659	675.569	877.389	657.886	497.395	976.739	805.107	-0.036454	0.89929	0.99972	Ets98B	3R	+	27736538	27748366	3522	protein_coding	NA	872	699	670	645	847	700	15.4919	15.4559	13.8639	13.1681	16.644	13.5009
FBgn0005660	718.954	2056.03	923.004	493.539	1932.72	1268.62	0.00075463	0.99837	0.99972	Ets21C	2L	-	544925	552923	5407	protein_coding	NA	928	1638	940	640	1676	1103	16.7476	36.7914	19.7585	13.2727	33.4552	21.61
FBgn0005664	0.774735	6.27603	0	0.771154	10.3786	8.05107	-0.28408	0.3662	0.99972	Cry	2L	+	11944129	11947131	2261	protein_coding	NA	1	5	0	1	9	7	0.0247559	0.154055	0	0.028448	0.246437	0.188127
FBgn0005666	629.085	616.306	524.345	320.029	1980	401.404	-0.36723	0.33702	0.99972	bt	4	+	724400	776474	28019	protein_coding	NA	812	491	534	415	1717	349	1.55564	1.17074	1.19156	0.913638	3.63837	0.725859
FBgn0005670	61.9788	31.3801	45.1683	64.777	100.326	72.4597	-0.58274	0.079405	0.99972	Cyp4d1	X	-	2159145	2162180	2285	protein_coding	NA	80	25	46	84	87	63	2.46696	0.95949	1.65216	2.97664	2.96741	2.10906
FBgn0005671	5701.27	5289.44	5271.92	6157.67	7258.08	5809.43	-0.22304	0.28143	0.99972	Vha55	3R	-	12623762	12627829	2786	protein_coding	NA	7359	4214	5369	7985	6294	5051	152.6	108.757	129.674	190.276	144.36	113.707
FBgn0005672	424.555	355.223	332.871	321.571	452.045	285.238	0.063253	0.8119	0.99972	spi	2L	-	19567900	19577315	1817	protein_coding	NA	548	283	339	417	392	248	18.1291	11.6522	13.0622	15.8528	14.3439	8.9068
FBgn0005674	1407.69	1168.6	1099.75	1622.51	994.037	1135.2	-0.025977	0.92099	0.99972	Aats-glupro	3R	-	23952136	23958391	5453	protein_coding	NA	1817	931	1120	2104	862	987	21.8073	13.9067	15.6562	29.0179	11.443	12.8599
FBgn0005677	1.54947	1.25521	9.81919	9.25385	23.0635	2.30031	-0.42237	0.23911	0.99972	dac	2L	-	16466512	16485998	4982	protein_coding	NA	2	1	10	12	20	2	0.0207324	0.0129017	0.120737	0.142947	0.229316	0.0225073
FBgn0005683	300.597	112.968	308.323	532.096	99.1731	204.727	-0.1291	0.73523	0.99972	pie	2L	-	10420625	10422780	2089	protein_coding	NA	388	90	314	690	86	178	9.73673	2.81094	9.17768	19.8978	2.38707	4.84927
FBgn0005694	1372.83	846.008	1288.28	1876.22	695.365	994.883	-0.018842	0.95447	0.99972	Aef1	3L	+	21433422	21438639	4007	protein_coding	NA	1772	674	1312	2433	603	865	31.0727	14.7097	26.7961	49.0266	11.6955	16.4667
FBgn0005695	1190.77	623.837	1150.81	1970.3	442.819	947.726	-0.12299	0.7359	0.99972	gcl	2R	+	8724258	8728999	2509	protein_coding	NA	1537	497	1172	2555	384	824	31.7566	12.7804	28.204	60.6632	8.7756	18.4826
FBgn0005696	461.742	238.489	433.026	671.675	207.572	433.608	-0.15379	0.65996	0.99972	DNApol-alpha73	3R	+	27239163	27241228	2066	protein_coding	NA	596	190	441	871	180	377	14.8116	5.87676	12.7649	24.8742	4.94782	10.1712
FBgn0005771	293.625	426.77	348.581	287.641	558.137	583.128	-0.34101	0.26098	0.99972	noc	2L	+	14490859	14494019	2859	protein_coding	NA	379	340	355	373	484	507	7.03516	7.85492	7.67512	7.95641	9.93722	10.2169
FBgn0005775	3.87367	6.27603	4.9096	4.62693	3.45953	0	0.2281	0.51146	0.99972	Con	3L	-	4936758	5079033	5947	protein_coding	NA	5	5	5	6	3	0	0.0549365	0.0683737	0.0639857	0.0757558	0.0364584	0
FBgn0005777	1113.29	780.738	1090.91	1810.67	712.662	956.928	-0.1742	0.58752	0.99972	PpD3	3R	+	9747875	9751094	2509	protein_coding	NA	1437	622	1111	2348	618	832	30.375	16.3636	27.3524	57.0337	14.4488	19.0923
FBgn0008635	2165.38	2652.25	2114.07	1798.33	2545.06	2440.63	0.027875	0.90774	0.99972	betaCOP	X	-	18381549	18385242	3203	protein_coding	NA	2795	2113	2153	2332	2207	2122	44.8035	42.1558	40.1972	42.9568	39.1307	36.9275
FBgn0008646	1.54947	1.25521	3.92768	6.16923	48.4334	23.0031	-1.2374	0.0012613	0.087899	E5	3R	-	13867345	13874916	2122	protein_coding	NA	2	1	4	8	42	20	0.0483918	0.0301141	0.112726	0.222436	1.12402	0.525347
FBgn0008651	10.0716	2.51041	7.85535	6.94039	3.45953	5.75077	0.13744	0.7182	0.99972	lbl	3R	-	21409979	21434133	2744	protein_coding	NA	13	2	8	9	3	5	0.369788	0.0708056	0.265046	0.294189	0.0943878	0.154403
FBgn0010014	3.87367	6.27603	0	4.62693	0	2.30031	0.08137	0.77721	0.99972	CanB	X	+	5332499	5334449	1234	protein_coding	NA	5	5	0	6	0	2	0.217374	0.270542	0	0.299752	0	0.0943934
FBgn0010015	5.42314	23.8489	5.89151	8.4827	55.3524	10.3514	-0.42577	0.26556	0.99972	CanA1	3R	+	31039374	31046821	3064	protein_coding	NA	7	19	6	11	48	9	0.131122	0.442955	0.130903	0.23678	0.994498	0.183019
FBgn0010019	145392	220120	214511	75421.2	320819	229469	-0.077598	0.82694	0.99972	Cyp4g1	X	-	467057	469335	2279	protein_coding	NA	187667	175366	218461	97803	278205	199512	4227.96	4917.18	5732.43	2532.03	6932.54	4879.62
FBgn0010038	31.7641	67.7811	31.4214	28.5327	74.9564	32.2043	-0.034589	0.92657	0.99972	GstD2	3R	+	12371971	12372704	734	protein_coding	NA	41	54	32	37	65	28	2.86797	4.70124	2.60713	2.97417	5.02909	2.1263
FBgn0010039	216.926	269.869	158.089	287.641	355.178	284.088	-0.44876	0.10278	0.99972	GstD3	3R	+	12373068	12373813	746	protein_coding	NA	280	215	161	373	308	247	19.2711	18.4168	12.9061	29.5006	23.4468	18.4552
FBgn0010040	3.09894	8.78644	2.94576	3.85577	4.6127	0	0.19198	0.5722	0.99972	GstD4	3R	+	12374100	12374824	725	protein_coding	NA	4	7	3	5	4	0	0.283275	0.616985	0.247453	0.406905	0.313324	0
FBgn0010041	32.5389	42.677	20.6203	101.792	146.453	123.066	-1.5224	2.5852e-06	0.00058374	GstD5	3R	+	12375733	12376572	840	protein_coding	NA	42	34	21	132	127	107	2.56718	2.58651	1.49503	9.27161	8.58611	7.10013
FBgn0010042	3.09894	1.25521	0.981919	9.25385	5.76588	10.3514	-0.72689	0.051788	0.90414	GstD6	3R	+	12377128	12377907	780	protein_coding	NA	4	1	1	12	5	9	0.263301	0.0819257	0.076668	0.90771	0.364038	0.643146
FBgn0010043	1.54947	0	0.981919	0	1.15318	5.75077	-0.15003	0.54826	0.99972	GstD7	3R	+	12378500	12379255	756	protein_coding	NA	2	0	1	0	1	5	0.13583	0	0.079102	0	0.075119	0.368646
FBgn0010044	1.54947	0	1.96384	3.08462	0	2.30031	-0.076452	0.76874	0.99972	GstD8	3R	+	12380008	12380815	808	protein_coding	NA	2	0	2	4	0	2	0.127088	0	0.148022	0.292085	0	0.137969
FBgn0010051	1921.34	2468.99	1895.1	1400.42	2009.98	2103.63	0.16646	0.51145	0.99972	Itp-r83A	3R	+	5517117	5539411	10331	protein_coding	NA	2480	1967	1930	1816	1743	1829	12.486	12.3255	11.3175	10.5066	9.70631	9.99679
FBgn0010052	25.5663	32.6353	27.4937	7.71154	24.2167	36.8049	0.19362	0.61522	0.99972	Jhe	2R	+	16119793	16122773	2101	protein_coding	NA	33	26	28	10	21	32	0.851	0.834482	0.841	0.296339	0.59899	0.895861
FBgn0010053	745.295	835.967	875.872	437.244	686.139	906.321	0.23232	0.41782	0.99972	Jheh1	2R	-	18853434	18855087	1486	protein_coding	NA	962	666	892	567	595	788	33.2386	28.6398	35.8967	22.5126	22.7389	29.5576
FBgn0010078	19605.4	28228.3	25575.1	14746.8	25136.9	26976.9	0.11407	0.68588	0.99972	RpL23	2R	+	22854383	22855694	542	protein_coding	NA	25306	22489	26046	19123	21798	23455	2397.24	2651.46	2873.76	2081.7	2283.96	2412.11
FBgn0010097	453.995	203.343	346.617	769.612	76.1096	358.848	-0.14955	0.69935	0.99972	gammaTub37C	2L	-	19183863	19185726	1628	protein_coding	NA	586	162	353	998	66	312	19.1031	6.57278	13.403	37.3861	2.37977	11.0417
FBgn0010100	4924.99	5630.85	4491.3	4759.56	4571.19	4697.23	0.09357	0.64773	0.99972	Acon	2L	+	21168570	21173185	3103	protein_coding	NA	6357	4486	4574	6172	3964	4084	111.473	97.9046	93.4188	124.37	76.8837	77.7457
FBgn0010105	43.3852	100.416	60.879	47.0404	85.335	102.364	-0.14285	0.68609	0.99972	comm	3L	-	15721511	15728430	2495	protein_coding	NA	56	80	62	61	74	89	1.37769	2.44953	1.77655	1.72452	2.01364	2.377
FBgn0010109	2.3242	0	0	11.5673	3.45953	1.15015	-0.4087	0.1696	0.99972	dpn	2R	-	8228971	8232330	2036	protein_coding	NA	3	0	0	15	3	1	0.0756537	0	0	0.434684	0.0836788	0.0273769
FBgn0010113	1192.32	794.545	996.648	1688.83	1080.52	901.72	-0.25026	0.3872	0.99972	hdc	3R	+	30277932	30372382	15063	protein_coding	NA	1539	633	1015	2190	937	784	12.062	6.17463	9.26547	19.7241	8.12276	6.67068
FBgn0010114	3.09894	12.5521	3.92768	10.7962	41.5143	25.3034	-0.91118	0.019514	0.54816	hig	2R	-	9227785	9247249	4332	protein_coding	NA	4	10	4	14	36	22	0.0495835	0.154278	0.0577509	0.199425	0.493588	0.296056
FBgn0010173	1967.83	1203.74	1662.39	3026.78	1128.96	1611.37	-0.19667	0.54883	0.99972	RpA-70	3R	-	8262120	8264451	2135	protein_coding	NA	2540	959	1693	3925	979	1401	61.0833	28.7035	47.4207	108.468	26.0409	36.5765
FBgn0010194	193.684	77.8227	170.854	326.969	64.5778	85.1114	-0.064859	0.86599	0.99972	Wnt5	X	-	18501401	18505405	4005	protein_coding	NA	250	62	174	424	56	74	3.2678	1.00864	2.64903	6.36876	0.809633	1.05008
FBgn0010197	7.74735	5.02082	12.7649	9.25385	5.76588	13.8018	-0.077498	0.84261	0.99972	Gyc32E	2L	-	11138759	11149101	3845	protein_coding	NA	10	4	13	12	5	12	0.13583	0.0676212	0.205665	0.187305	0.075119	0.17695
FBgn0010198	16467.8	22541	19782.7	10870.2	18027.6	19678	0.23517	0.39429	0.99972	RpS15Aa	X	-	13335637	13337705	944	protein_coding	NA	21256	17958	20147	14096	15633	17109	1472.82	1548.65	1625.93	1122.38	1198.11	1286.97
FBgn0010213	1142.73	1353.11	1170.45	1101.98	1164.71	1381.33	0.0065248	0.97629	0.99972	Sod2	2R	-	16772785	16773915	1015	protein_coding	NA	1475	1078	1192	1429	1010	1201	79.7178	72.512	75.0346	88.7502	60.3767	70.4662
FBgn0010215	1372.06	1054.37	1181.25	1983.41	1275.41	1181.21	-0.25842	0.33767	0.99972	alpha-Cat	3L	-	23318646	23338100	3487	protein_coding	NA	1771	840	1203	2572	1106	1027	28.0301	16.5468	22.1765	46.779	19.3618	17.6462
FBgn0010217	13127.9	16911.4	14069.9	11470.1	13308.8	15049.8	0.13358	0.5562	0.99972	ATPsyn-beta	4	+	1031484	1034917	2386	protein_coding	NA	16945	13473	14329	14874	11541	13085	452.899	448.179	446.064	456.837	341.183	379.672
FBgn0010220	333.911	332.629	377.057	384.806	319.429	281.788	0.071716	0.76469	0.99972	Dbp45A	2R	+	9087834	9089802	1670	protein_coding	NA	431	265	384	499	277	245	13.251	10.1401	13.7507	17.6297	9.41966	8.17733
FBgn0010222	2930.05	4518.74	3161.78	1760.55	4442.03	5715.11	-0.1254	0.71159	0.99972	Nmdmc	3R	-	9042508	9050555	1516	protein_coding	NA	3782	3600	3220	2283	3852	4969	159.82	189.339	158.485	110.864	180.045	227.958
FBgn0010223	125.507	31.3801	96.2281	45.4981	299.826	58.6578	-0.34129	0.38245	0.99972	Galphaf	3L	-	16662557	16667934	1825	protein_coding	NA	162	25	98	59	260	51	4.55763	0.875371	3.21124	1.90744	8.09063	1.55765
FBgn0010225	17278.1	26627.9	19594.2	9492.91	20811.3	23485	0.18938	0.55137	0.99972	Gel	3R	+	4235217	4241057	3286	protein_coding	NA	22302	21214	19955	12310	18047	20419	410.418	485.885	427.717	260.324	367.344	407.936
FBgn0010226	1967.05	2598.28	2185.75	2307.29	2999.41	3414.81	-0.32831	0.18194	0.99972	GstS1	2R	-	17093246	17099501	2275	protein_coding	NA	2539	2070	2226	2992	2601	2969	83.6724	84.902	85.4411	113.306	94.808	106.22
FBgn0010228	1234.15	1648.08	1236.24	697.123	1703.24	1450.34	0.077904	0.80312	0.99972	HmgZ	2R	-	21697488	21707861	1604	protein_coding	NA	1593	1313	1259	904	1477	1261	85.1097	87.3084	78.345	55.5016	87.2829	73.1397
FBgn0010235	1062.16	1238.89	1079.13	1297.85	1391.88	1345.68	-0.23723	0.24379	0.99972	Klc	3L	-	12746616	12750056	2065	protein_coding	NA	1371	987	1099	1683	1207	1170	37.9882	34.0374	35.4676	53.5882	36.9917	35.1943
FBgn0010238	1007.16	1123.41	974.064	1290.14	1188.92	1007.53	-0.15372	0.48253	0.99972	Lac	2R	+	12453190	12465630	2156	protein_coding	NA	1300	895	992	1673	1031	876	30.9586	26.5271	27.5152	45.7834	27.157	22.6473
FBgn0010240	0	3.76562	2.94576	0	1.15318	0	0.19053	0.39474	NA	Lcch3	X	+	15925105	15928529	1903	protein_coding	NA	0	3	3	0	1	0	0	0.100739	0.0942739	0	0.0298424	0
FBgn0010241	35.6378	53.9738	52.0417	46.2693	102.633	55.2074	-0.38411	0.26852	0.99972	Mdr50	2R	+	14246966	14252597	4256	protein_coding	NA	46	43	53	60	89	48	0.554936	0.645627	0.744703	0.831783	1.18757	0.628639
FBgn0010246	1551.79	2620.87	1560.27	1121.26	2450.5	2013.92	0.029893	0.92446	0.99972	Myo61F	3L	+	1318480	1329617	3955	protein_coding	NA	2003	2088	1589	1454	2125	1751	29.68	38.5072	27.4239	24.7584	34.8279	28.1673
FBgn0010247	722.828	475.723	664.759	1099.67	412.837	480.764	-0.074353	0.82414	0.99972	Parp	3R	-	3461351	3587054	3112	protein_coding	NA	933	379	677	1426	358	418	15.3932	7.78242	13.0094	27.0359	6.53304	7.48684
FBgn0010258	27.8905	5.02082	15.7107	2.31346	5.76588	1.15015	0.87697	0.021353	0.56725	Rbp4	3R	-	13654556	13656394	1515	protein_coding	NA	36	4	16	3	5	1	1.22005	0.168718	0.631563	0.116834	0.187426	0.0367916
FBgn0010263	93.7429	114.224	79.5355	55.5231	344.799	92.0123	-0.46075	0.22965	0.99972	Rbp9	2L	+	2954762	2968434	8054	protein_coding	NA	121	91	81	72	299	80	1.63661	1.5319	1.27605	1.11909	4.47318	1.1747
FBgn0010265	16271.8	21868.2	18985.4	12714	17880	20901.7	0.13087	0.61365	0.99972	RpS13	2L	-	8363477	8364662	899	protein_coding	NA	21003	17422	19335	16487	15505	18173	1510.32	1559.25	1619.4	1362.4	1233.23	1418.7
FBgn0010269	684.091	498.317	667.705	862.922	484.334	532.521	-0.019844	0.94456	0.99972	Dsor1	X	+	9247342	9250037	1799	protein_coding	NA	883	397	680	1119	420	463	27.46	15.3659	24.6304	39.9893	14.4469	15.6313
FBgn0010278	1487.49	982.826	1514.12	2190.08	726.5	1206.51	-0.03761	0.91066	0.99972	Ssrp	2R	-	23806361	23809004	2507	protein_coding	NA	1920	783	1542	2840	630	1049	39.3218	19.9582	36.7823	66.8382	14.2711	23.3229
FBgn0010280	1744.7	1193.7	1880.38	2412.94	1161.25	1329.58	-0.020595	0.94665	0.99972	Taf4	3L	+	16113212	16121651	5516	protein_coding	NA	2252	951	1915	3129	1007	1156	24.8765	13.0746	24.6384	39.7192	12.3037	13.8629
FBgn0010282	1130.34	785.759	975.046	1735.1	778.393	1039.74	-0.24196	0.42776	0.99972	TfIIFalpha	3R	+	6380467	6382604	1938	protein_coding	NA	1459	626	993	2250	675	904	38.6535	20.6412	30.6411	68.4998	19.7798	26.0002
FBgn0010287	83.6714	76.5675	59.8971	134.952	41.5143	100.063	-0.23757	0.50222	0.99972	Trf	2L	+	8072895	8073948	983	protein_coding	NA	108	61	61	175	36	87	5.64101	3.96544	3.71095	10.5038	2.0798	4.93319
FBgn0010288	1365.86	969.019	1314.79	1850.77	1232.74	1273.22	-0.22209	0.3996	0.99972	Uch	2L	-	2212738	2214211	1196	protein_coding	NA	1763	772	1339	2400	1069	1107	82.8928	45.1762	73.3275	129.673	55.5939	56.505
FBgn0010292	430.753	390.369	504.706	426.448	302.132	370.349	0.2391	0.33586	0.99972	bys	X	+	7901880	7903643	1518	protein_coding	NA	556	311	514	553	262	322	18.8057	13.0919	20.2488	21.4938	9.8017	11.8235
FBgn0010300	2094.11	1017.97	2021.77	3412.36	845.277	1174.31	-0.054614	0.88198	0.99972	brat	2L	+	19133816	19179758	12788	protein_coding	NA	2703	811	2059	4425	733	1021	21.2075	7.9194	18.8158	39.8961	6.3611	8.69649
FBgn0010303	1267.47	1119.64	1279.44	1500.67	1161.25	1204.21	-0.069941	0.75277	0.99972	hep	X	-	13079205	13090434	6215	protein_coding	NA	1636	892	1303	1946	1007	1047	17.4923	11.8702	16.2267	23.9101	11.9091	12.1531
FBgn0010309	201.431	94.1404	182.637	328.512	96.8667	132.268	-0.15106	0.67939	0.99972	pigeon	2L	+	19186043	19189938	3334	protein_coding	NA	260	75	186	426	84	115	4.09364	1.46969	3.41092	7.70761	1.46285	1.96566
FBgn0010313	1629.27	1026.76	1554.38	2263.34	870.647	1139.8	-0.016871	0.95899	0.99972	corto	3R	-	5077779	5087072	9294	protein_coding	NA	2103	818	1583	2935	755	991	24.3079	11.7676	21.3114	38.9843	9.65251	12.4353
FBgn0010314	326.938	91.63	306.359	642.372	125.696	211.628	-0.25378	0.51014	0.99972	Cks30A	2L	+	9330763	9331981	1147	protein_coding	NA	422	73	312	833	109	184	18.8902	4.067	16.2667	42.8492	5.39678	8.94162
FBgn0010315	896.368	507.103	669.669	1314.05	418.603	677.44	-0.16076	0.63973	0.99972	CycD	X	-	15906822	15909676	2453	protein_coding	NA	1157	404	682	1704	363	589	25.9976	11.2982	17.8487	43.9991	9.02178	14.3678
FBgn0010316	679.443	414.218	592.097	906.877	219.103	392.202	0.10431	0.77197	0.99972	dap	2R	+	9712321	9716256	2530	protein_coding	NA	877	330	603	1176	190	341	17.7978	8.33505	14.253	27.4251	4.26486	7.51269
FBgn0010317	87.545	55.229	85.427	112.589	26.523	34.5046	0.24056	0.52553	0.99972	CycJ	3L	+	3466428	3468098	1478	protein_coding	NA	113	44	87	146	23	30	3.93345	1.90623	3.52725	5.84012	0.885539	1.13368
FBgn0010323	1.54947	0	0.981919	0.771154	0	0	0.078564	0.65212	NA	Gsc	2L	-	583544	594685	2362	protein_coding	NA	2	0	1	1	0	0	0.0434747	0	0.025318	0.0249793	0	0
FBgn0010328	2341.25	1456.04	2376.24	3470.19	1105.89	1655.07	-0.010092	0.9765	0.99972	woc	3R	-	27256595	27264055	6332	protein_coding	NA	3022	1160	2420	4500	959	1439	28.5958	13.6613	26.6713	48.932	10.0372	14.7823
FBgn0010329	0.774735	8.78644	6.87343	16.1942	5.76588	3.45046	-0.21803	0.55064	0.99972	Tbh	X	+	7995697	8027394	3868	protein_coding	NA	1	7	7	21	5	3	0.0136118	0.118588	0.110978	0.32848	0.0752784	0.0443314
FBgn0010333	1470.45	1265.25	1360.94	1769.8	1322.69	1406.64	-0.123	0.58572	0.99972	Rac1	3L	-	1300879	1302683	1805	protein_coding	NA	1898	1008	1386	2295	1147	1223	55.3066	36.5569	47.0399	76.8489	36.9683	38.6885
FBgn0010339	667.047	660.238	612.718	726.427	449.738	579.677	0.1258	0.61782	0.99972	128up	2R	+	12037298	12038851	1304	protein_coding	NA	861	526	624	942	390	504	33.901	25.7764	28.6165	42.622	16.9847	21.5434
FBgn0010340	156.496	120.5	149.252	177.365	116.471	157.571	-0.070652	0.79899	0.99972	140up	3R	-	14124163	14125548	1200	protein_coding	NA	202	96	152	230	101	137	9.70198	5.73863	8.50305	12.6944	5.36557	7.14339
FBgn0010341	2297.09	2654.76	2100.33	2419.11	2975.19	2828.23	-0.20239	0.35664	0.99972	Cdc42	X	+	19697091	19699938	2078	protein_coding	NA	2965	2115	2139	3137	2580	2459	83.4159	74.0564	70.0901	101.417	80.2839	75.103
FBgn0010342	869.253	588.691	898.456	1957.96	372.476	670.539	-0.22887	0.53792	0.99972	Map60	2R	+	9590867	9592744	1814	protein_coding	NA	1122	469	915	2539	323	583	31.7572	16.5215	30.1643	82.5821	10.112	17.914
FBgn0010348	4792.51	5473.95	4427.47	4445.7	5234.26	5131.98	-0.010618	0.96002	0.99972	Arf79F	3L	-	22868380	22872231	2442	protein_coding	NA	6186	4361	4509	5765	4539	4462	213.88	187.661	181.578	229.052	173.582	167.481
FBgn0010350	633.733	615.051	603.88	857.524	673.454	599.23	-0.18208	0.43816	0.99972	CdsA	3L	+	8127762	8131675	2609	protein_coding	NA	818	490	615	1112	584	521	16.7996	12.5248	14.7111	26.2437	13.2661	11.6161
FBgn0010352	8852.9	12139.1	9808.39	4882.18	8084.91	9795.86	0.36647	0.20105	0.99972	Nc73EF	3L	+	16954822	16968724	5338	protein_coding	NA	11427	9671	9989	6331	7011	8517	146.603	154.422	149.264	93.3374	99.4889	118.624
FBgn0010355	1341.84	1285.33	1474.84	1985.72	1014.79	1167.41	-0.019922	0.94416	0.99972	Taf1	3R	+	6646889	6656048	6876	protein_coding	NA	1732	1024	1502	2575	880	1015	13.3005	9.78697	13.4342	22.7233	7.4746	8.46177
FBgn0010356	429.203	269.869	413.388	598.416	309.051	311.692	-0.1062	0.73437	0.99972	Taf5	2R	-	10877312	10879673	2362	protein_coding	NA	554	215	421	776	268	271	12.0425	5.81666	10.6589	19.384	6.44357	6.39516
FBgn0010357	55.7809	0	2040.43	5648.71	0	0	-0.056306	NA	NA	betaTry	2R	+	11346325	11347395	1071	protein_coding	NA	72	0	2078	7325	0	0	3.92436	0	131.918	458.794	0	0
FBgn0010359	0.774735	0	0	6.16923	0	0	-0.13289	0.46506	NA	gammaTry	2R	-	11349061	11349870	810	protein_coding	NA	1	0	0	8	0	0	0.0633872	0	0	0.582728	0	0
FBgn0010379	1680.4	1507.5	1606.42	1750.52	1499.13	1438.84	0.029559	0.88742	0.99972	Akt1	3R	+	16099228	16105670	4889	protein_coding	NA	2169	1201	1636	2270	1300	1251	29.0314	20.0069	25.5043	34.9147	19.2458	18.1778
FBgn0010380	1607.57	1762.31	1557.32	2055.13	1875.06	1837.95	-0.21163	0.29097	0.99972	AP-1-2beta	X	+	19731004	19734581	3228	protein_coding	NA	2075	1404	1586	2665	1626	1598	33.0044	27.7938	29.3818	48.7107	28.6061	27.5934
FBgn0010381	38381.9	74866.7	55704.3	51210.8	172901	164888	-0.86219	0.014289	0.45314	Drs	3L	+	3369556	3369942	387	protein_coding	NA	49542	59645	56730	66408	149935	143362	6572.79	9848.68	8766.19	10124.4	22002.1	20648.3
FBgn0010382	1855.49	820.904	1728.18	3519.55	597.345	1280.12	-0.18287	0.62922	0.99972	CycE	2L	-	15727581	15748150	5047	protein_coding	NA	2395	654	1760	4564	518	1113	33.5154	11.3906	28.6863	73.3937	8.01778	16.9087
FBgn0010383	444.698	787.014	579.332	198.187	513.163	443.959	0.49688	0.13359	0.99972	Cyp18a1	X	-	18688538	18693042	3049	protein_coding	NA	574	627	590	257	445	386	11.2314	15.2693	13.4461	5.7787	9.63093	8.19946
FBgn0010385	1313.95	1481.14	1259.8	620.779	2470.1	1558.46	-0.1439	0.67824	0.99972	Def	2R	-	10054178	10054576	399	protein_coding	NA	1696	1180	1283	805	2142	1355	218.243	188.984	192.293	119.037	304.873	189.29
FBgn0010387	7651.28	11264.2	8015.41	3249.64	7274.23	9288.64	0.3424	0.29564	0.99972	Dbi	3L	+	7131863	7133463	432	protein_coding	NA	9876	8974	8163	4214	6308	8076	1258.24	1422.97	1211.31	616.95	888.911	1117
FBgn0010388	406.736	3494.49	332.871	618.466	1201.61	2721.26	-0.047564	0.90297	0.99972	Dro	2R	+	14745961	14746714	754	protein_coding	NA	525	2784	339	802	1042	2366	48.5683	320.547	36.5271	85.2594	106.622	237.62
FBgn0010389	24.0168	70.2915	33.3853	23.1346	100.326	31.0541	-0.15465	0.6904	0.99972	htl	3R	-	18045216	18052984	4094	protein_coding	NA	31	56	34	30	87	27	0.436428	0.981222	0.557509	0.48534	1.35474	0.412657
FBgn0010391	1230.28	1399.55	1324.61	1004.04	1290.4	1342.23	0.11016	0.62411	0.99972	Gtp-bp	X	-	11126877	11129087	2056	protein_coding	NA	1588	1115	1349	1302	1119	1167	39.6565	34.6551	39.2372	37.3636	30.9086	31.638
FBgn0010395	146.425	202.088	143.36	75.5731	259.464	172.523	-0.03124	0.92878	0.99972	Itgbetanu	2L	+	21053033	21058044	3340	protein_coding	NA	189	161	146	98	225	150	3.02492	3.20705	2.72162	1.8024	3.98309	2.60627
FBgn0010397	1154.35	1615.45	1108.59	915.36	2120.69	1720.63	-0.23712	0.44336	0.99972	LamC	2R	-	14570810	14575771	2450	protein_coding	NA	1490	1287	1129	1187	1839	1496	31.7568	34.1395	28.0263	29.072	43.3528	34.6144
FBgn0010398	180.513	105.437	146.306	268.362	65.731	109.265	-0.026439	0.94259	0.99972	Lrr47	2L	+	10517335	10519269	1874	protein_coding	NA	233	84	149	348	57	95	6.90709	3.09918	5.14455	11.8547	1.86895	3.0573
FBgn0010399	2.3242	0	0.981919	1.54231	2.30635	0	-0.018927	0.93822	NA	Nmdar1	3R	-	5508842	5523328	4170	protein_coding	NA	3	0	1	2	2	0	0.0369379	0	0.0143408	0.0282979	0.0272374	0
FBgn0010401	9.29682	0	0	3.08462	0	2.30031	0.084132	0.72684	0.99972	Os-C	3R	+	7978959	7979614	604	protein_coding	NA	12	0	0	4	0	2	1.09242	0	0	0.418448	0	0.197657
FBgn0010403	1.54947	0	0	1.54231	3.45953	3.45046	-0.29743	0.28172	0.99972	Obp83b	3R	-	5976177	5976817	528	protein_coding	NA	2	0	0	2	3	3	0.194484	0	0	0.223489	0.32267	0.316701
FBgn0010406	626.761	696.639	637.266	626.177	777.24	567.026	-0.0066034	0.97715	0.99972	RNaseX25	3L	+	7970588	7972449	1663	protein_coding	NA	809	555	649	812	674	493	24.9772	21.3263	23.3379	28.8088	23.0165	16.524
FBgn0010407	15.4947	28.8697	13.7469	6.94039	10.3786	8.05107	0.66556	0.085933	0.99972	Ror	2L	+	10251843	10254686	2271	protein_coding	NA	20	23	14	9	9	7	0.452168	0.647181	0.368655	0.233822	0.225059	0.171808
FBgn0010408	4402.04	7695.66	6937.26	3659.13	5181.22	6819.26	0.23253	0.43299	0.99972	RpS9	3L	-	9509793	9511531	1018	protein_coding	NA	5682	6131	7065	4745	4493	5929	369.284	495.929	534.803	354.38	322.984	418.327
FBgn0010409	17296.7	24615.8	20701.8	13238.4	20660.3	23052.5	0.11739	0.66679	0.99972	RpL18A	2R	-	17546406	17547462	635	protein_coding	NA	22326	19611	21083	17167	17916	20043	1805.19	1973.52	1985.49	1595.08	1602.28	1759.34
FBgn0010411	16418.2	26310.4	23460	13824.5	22147.9	26443.2	0.070518	0.80901	0.99972	RpS18	2R	+	20263979	20264848	612	protein_coding	NA	21192	20961	23892	17927	19206	22991	1828.7	2251.18	2401.29	1777.67	1833.12	2153.79
FBgn0010412	13599.7	17389.6	14969.4	10782.3	16401.6	16939.5	0.051723	0.83902	0.99972	RpS19a	X	+	16637894	16639249	1254	protein_coding	NA	17554	13854	15245	13982	14223	14728	1181.24	1160.29	1194.85	1081.2	1058.62	1075.92
FBgn0010414	0	2.51041	14.7288	13.1096	42.6675	16.1021	-0.61572	0.090693	0.99972	SerT	2R	-	24404595	24411074	3725	protein_coding	NA	0	2	15	17	37	14	0	0.0370018	0.259704	0.290394	0.608347	0.225927
FBgn0010415	3070.27	3342.61	3084.21	2501.62	3947.32	4411.99	-0.16844	0.5204	0.99972	Sdc	2R	-	21392402	21481176	4202	protein_coding	NA	3963	2663	3141	3244	3423	3836	74.862	62.609	69.1079	70.4194	71.5203	78.6667
FBgn0010416	608.942	527.186	619.591	775.01	373.629	541.722	0.044898	0.87647	0.99972	TH1	X	-	16388820	16391438	2297	protein_coding	NA	786	420	631	1005	324	471	18.9288	12.5886	17.6991	27.8125	8.63038	12.3139
FBgn0010417	453.22	484.509	505.688	693.268	415.143	542.872	-0.17112	0.50893	0.99972	Taf6	3L	+	19599088	19601382	2056	protein_coding	NA	585	386	515	899	360	472	14.6161	12.003	14.9866	25.8112	9.94861	12.8024
FBgn0010421	398.988	261.083	334.834	643.143	216.797	281.788	-0.14796	0.66597	0.99972	TfIIFbeta	3R	-	10766622	10767804	1118	protein_coding	NA	515	208	341	834	188	245	23.6512	11.8888	18.2399	44.0134	9.54966	12.2148
FBgn0010422	577.952	517.145	555.766	850.583	400.152	457.761	-0.041776	0.88926	0.99972	TfIIS	2L	-	15058919	15060757	1773	protein_coding	NA	746	412	566	1103	347	398	24.1351	16.5896	21.3279	41.0071	12.4172	13.9787
FBgn0010423	85.9956	144.349	76.5897	59.3789	267.537	134.568	-0.3834	0.30289	0.99972	TpnC47D	2R	-	11273845	11275286	791	protein_coding	NA	111	115	78	77	232	117	8.18843	10.5585	6.70184	6.52743	18.93	9.36997
FBgn0010424	192.909	430.535	184.601	144.977	559.29	303.641	-0.21239	0.56467	0.99972	TpnC73F	3L	+	17046063	17048390	1059	protein_coding	NA	249	343	188	188	485	264	12.6455	21.6799	11.1203	10.9715	27.2435	14.5551
FBgn0010425	18.5936	0	461.502	1004.81	0	0	-0.043217	NA	NA	epsilonTry	2R	-	11345237	11346066	830	protein_coding	NA	24	0	470	1303	0	0	1.48464	0	33.8633	92.6247	0	0
FBgn0010431	1923.67	863.581	1878.41	3480.99	514.316	1385.93	-0.12596	0.74097	0.99972	mtrm	3L	+	8413012	8414103	1092	protein_coding	NA	2483	688	1913	4514	446	1205	116.746	40.2606	104.761	243.893	23.1945	61.5072
FBgn0010434	3358.48	6658.86	3460.28	2710.61	7836.98	5138.89	-0.16176	0.63762	0.99972	cora	2R	+	19229063	19243751	6043	protein_coding	NA	4335	5305	3524	3515	6796	4468	50.0393	76.2141	47.3784	46.6253	86.7682	55.9899
FBgn0010435	2582.97	3999.08	3102.86	2140.72	4154.89	3656.34	-0.032599	0.91126	0.99972	emp	2R	-	24976456	24986070	3522	protein_coding	NA	3334	3186	3160	2776	3603	3179	70.7062	84.0942	78.0551	67.6527	84.5165	73.191
FBgn0010438	3.09894	2.51041	2.94576	6.94039	0	0	0.038116	0.89264	0.99972	mtSSB	3R	-	16204194	16205250	575	protein_coding	NA	4	2	3	9	0	0	0.357173	0.222268	0.312006	0.923497	0	0
FBgn0010441	524.496	627.603	524.345	651.625	599.651	519.869	-0.073364	0.74643	0.99972	pll	3R	-	27251131	27253182	1931	protein_coding	NA	677	500	534	845	520	452	18.3719	16.8874	16.8783	26.3509	15.6082	13.3162
FBgn0010452	44.1599	50.2082	36.331	25.4481	26.523	31.0541	0.4987	0.13415	0.99972	trn	3L	+	13114271	13118077	3365	protein_coding	NA	57	40	37	33	23	27	0.869714	0.759608	0.657545	0.578615	0.388163	0.44724
FBgn0010453	13.9452	12.5521	12.7649	27.7616	27.6762	5.75077	-0.33996	0.38375	0.99972	Wnt4	2L	-	7255419	7277171	3367	protein_coding	NA	18	10	13	36	24	5	0.293113	0.202671	0.246563	0.673658	0.432274	0.0883909
FBgn0010470	3234.52	4768.53	3286.48	1644.1	4367.07	4776.59	0.04996	0.88096	0.99972	Fkbp14	2R	-	21487167	21497929	1800	protein_coding	NA	4175	3799	3347	2132	3787	4153	163.509	185.175	152.673	95.95	164.046	176.572
FBgn0010473	46.4841	23.8489	44.1864	35.4731	28.8294	20.7028	0.30182	0.39999	0.99972	tutl	2L	+	4283148	4323781	9888	protein_coding	NA	60	19	45	46	25	18	0.601214	0.236951	0.525185	0.529675	0.277078	0.195806
FBgn0010482	163.469	207.109	205.221	91.7674	625.021	148.37	-0.34758	0.36534	0.99972	l(2)01289	2R	-	6721101	6740672	9515	protein_coding	NA	211	165	209	119	542	129	2.08618	2.03039	2.40678	1.35204	5.92724	1.38463
FBgn0010488	8879.24	8290.63	8472.98	10403.6	7383.78	8003.92	-0.0076373	0.97302	0.99972	NAT1	2R	+	12915994	12923734	5665	protein_coding	NA	11461	6605	8629	13491	6403	6959	104.893	75.2358	91.9828	141.887	64.8175	69.1426
FBgn0010497	1000.96	848.519	964.245	1323.3	1278.87	1464.15	-0.4895	0.019167	0.54509	dmGlut	2L	+	12027438	12034122	2426	protein_coding	NA	1292	676	982	1716	1109	1273	27.3438	17.8062	24.2064	41.7337	25.9605	29.2482
FBgn0010501	242.492	155.645	173.8	276.073	92.254	154.121	0.094978	0.78186	0.99972	Dcp-1	2R	+	23551313	23553547	1749	protein_coding	NA	313	124	177	358	80	134	9.18843	4.53051	6.05191	12.0769	2.5976	4.27048
FBgn0010504	191.36	176.984	174.782	189.704	204.112	213.929	-0.144	0.53936	0.99972	kermit	2R	-	8146918	8156654	2633	protein_coding	NA	247	141	178	246	177	186	7.21792	5.12817	6.05839	8.26084	5.72102	5.90069
FBgn0010516	3930.23	5737.54	4500.14	2722.17	4362.46	4878.95	0.20732	0.45819	0.99972	wal	2R	-	11688569	11690863	1579	protein_coding	NA	5073	4571	4583	3530	3783	4242	186.581	209.238	196.324	149.194	153.894	169.374
FBgn0010520	209.953	97.906	199.33	222.864	124.543	188.625	-0.060524	0.85313	0.99972	Bka	2L	+	9895287	9896104	758	protein_coding	NA	271	78	203	289	108	164	18.3564	6.57567	16.0153	22.4952	8.09145	12.0597
FBgn0010531	336.235	423.004	340.726	264.506	297.519	387.602	0.18624	0.46764	0.99972	Ccs	2R	-	10121486	10122574	977	protein_coding	NA	434	337	347	343	258	337	24.0899	23.2811	22.4335	21.8783	15.8398	20.3072
FBgn0010548	2894.41	3794.49	3381.73	2382.87	4613.85	4198.06	-0.12887	0.64898	0.99972	Aldh-III	2R	-	7466879	7477162	3593	protein_coding	NA	3736	3023	3444	3090	4001	3650	85.9023	86.5096	92.2324	81.6452	101.754	91.11
FBgn0010549	123.958	64.0155	126.668	383.264	50.7397	141.469	-0.50603	0.18948	0.99972	l(2)03659	2R	+	9390165	9395281	4499	protein_coding	NA	160	51	129	497	44	123	1.84399	0.731539	1.73161	6.58217	0.560889	1.53893
FBgn0010551	2513.24	2404.97	2534.33	2958.92	2226.78	2629.25	-0.063031	0.76937	0.99972	Phb2	2R	+	18819467	18822250	1889	protein_coding	NA	3244	1916	2581	3837	1931	2286	114.473	84.1487	106.08	155.593	75.3687	87.5739
FBgn0010575	2530.28	1961.89	2555.94	3369.94	1532.57	1778.14	0.062554	0.83745	0.99972	sbb	2R	-	18278198	18357296	11326	protein_coding	NA	3266	1563	2603	4370	1329	1546	22.7405	13.5447	21.1096	34.9654	10.2351	11.6861
FBgn0010583	869.253	730.529	771.788	1041.06	638.859	780.954	-0.047308	0.85347	0.99972	dock	2L	+	825969	833241	3735	protein_coding	NA	1122	582	786	1350	554	679	16.7464	10.8113	13.6639	23.1545	9.14583	11.002
FBgn0010590	1489.04	1756.03	1774.33	1631.76	1534.88	1716.03	0.036544	0.85992	0.99972	Prosbeta1	2R	-	16013805	16014787	852	protein_coding	NA	1922	1399	1807	2116	1331	1492	115.825	104.928	126.832	146.533	88.7177	97.6092
FBgn0010591	1411.57	1851.43	1520.99	1376.51	1561.4	1971.36	-0.033273	0.89138	0.99972	Sply	2R	-	17088441	17091958	2163	protein_coding	NA	1822	1475	1549	1785	1354	1714	45.7225	46.0682	45.2746	51.4746	37.5824	46.6946
FBgn0010602	1459.6	1284.08	1297.12	1959.5	1243.12	1226.06	-0.11595	0.65528	0.99972	lwr	2L	-	540599	542580	1864	protein_coding	NA	1884	1023	1321	2541	1078	1066	79.4183	53.6714	64.8581	123.089	50.2624	48.7833
FBgn0010607	261.086	149.369	205.221	313.86	186.814	117.316	-0.0049065	0.98838	0.99972	l(2)05714	2L	-	4970135	4973921	1285	protein_coding	NA	337	119	209	407	162	102	16.1256	7.08699	11.6481	22.3798	8.57407	5.29861
FBgn0010611	4281.19	6389	6498.34	3015.98	11386.5	9395.6	-0.34021	0.33112	0.99972	Hmgs	2R	+	16336090	16341242	2795	protein_coding	NA	5526	5090	6618	3911	9874	8169	141.863	162.631	197.882	115.377	280.372	227.667
FBgn0010612	2345.12	3631.31	2816.14	2036.62	2779.15	3532.12	0.063727	0.81886	0.99972	l(2)06225	2L	-	10975522	10976399	789	protein_coding	NA	3027	2893	2868	2641	2410	3071	273.141	324.901	301.423	273.853	240.534	300.836
FBgn0010620	901.791	793.29	706	838.245	1465.69	902.87	-0.35581	0.19757	0.99972	Sip1	2R	+	17394593	17405171	1717	protein_coding	NA	1164	632	719	1087	1271	785	34.8072	23.5213	25.0419	37.3525	42.0385	25.4836
FBgn0010621	2103.41	1656.87	1907.87	3103.9	1540.64	2049.57	-0.20236	0.47749	0.99972	Cct5	2R	+	12174802	12177516	1981	protein_coding	NA	2715	1320	1943	4025	1336	1782	75.3096	45.5704	62.7734	128.298	40.9894	53.6615
FBgn0010622	278.905	261.083	216.022	280.7	270.996	295.589	-0.14729	0.53211	0.99972	l(2)06496	2R	-	23061420	23062593	1174	protein_coding	NA	360	208	220	364	235	257	16.3573	11.7625	11.6427	19.0057	11.8103	12.677
FBgn0010638	2210.32	2943.46	2285.91	1618.65	2229.09	2234.75	0.2583	0.29336	0.99972	Sec61beta	2R	+	14618771	14619681	792	protein_coding	NA	2853	2345	2328	2099	1933	1943	184.954	189.205	175.779	156.368	138.605	136.744
FBgn0010651	1160.55	1266.5	1126.26	579.137	1025.17	1237.57	0.26996	0.35141	0.99972	l(2)08717	2R	-	18796975	18803727	3288	protein_coding	NA	1498	1009	1147	751	889	1076	31.2527	26.1996	27.8715	18.0048	20.5146	24.3704
FBgn0010660	1124.14	620.071	987.811	1755.15	577.741	757.951	-0.13029	0.70722	0.99972	Nup214	2R	-	22918937	22924742	5334	protein_coding	NA	1451	494	1006	2276	501	659	13.9669	5.91819	11.2786	25.1756	5.33404	6.88643
FBgn0010741	587.249	607.519	687.343	733.368	538.533	656.738	-0.03262	0.88826	0.99972	l(3)01239	3L	-	11073292	11074388	993	protein_coding	NA	758	484	700	951	467	571	42.9564	34.1375	46.2039	61.9317	29.2725	35.1293
FBgn0010747	1671.1	1802.47	1694.79	1564.67	1665.18	1586.06	0.095151	0.62278	0.99972	Srp54k	3L	+	5152678	5154777	2015	protein_coding	NA	2157	1436	1726	2029	1444	1379	54.9619	45.5401	51.2241	59.4111	40.6972	38.1462
FBgn0010750	451.67	289.952	321.088	724.885	267.537	332.394	-0.24022	0.47603	0.99972	atms	3R	+	4750035	4777490	2040	protein_coding	NA	583	231	327	940	232	289	15.713	7.74875	10.2651	29.1134	6.91616	8.45599
FBgn0010762	877	513.379	851.324	1214.57	450.891	554.374	0.010196	0.97597	0.99972	simj	3L	+	10664739	10690734	5134	protein_coding	NA	1132	409	867	1575	391	482	15.0222	6.75522	13.4008	24.0183	5.73918	6.944
FBgn0010768	88.3198	97.906	90.3366	140.35	95.7135	24.1532	0.052479	0.88888	0.99972	sqz	3R	+	19164211	19170576	3258	protein_coding	NA	114	78	92	182	83	21	1.79656	1.52988	1.68867	3.29595	1.44677	0.359277
FBgn0010770	352.504	263.593	353.491	500.479	284.834	327.794	-0.16852	0.55407	0.99972	ppan	3R	+	21116254	21117899	1477	protein_coding	NA	455	210	360	649	247	285	15.8168	9.0856	14.5758	25.9254	9.49704	10.7554
FBgn0010772	1093.93	1026.76	892.565	958.545	962.901	802.807	0.13276	0.5459	0.99972	Xe7	3R	-	5665139	5669334	3325	protein_coding	NA	1412	818	909	1243	835	698	22.2521	16.0442	16.6848	22.5103	14.5548	11.9417
FBgn0010774	1707.52	1253.95	1704.61	2597.25	1308.85	1597.56	-0.19853	0.49618	0.99972	Ref1	3R	-	7077904	7080387	1328	protein_coding	NA	2204	999	1736	3368	1135	1389	85.2119	48.0709	78.1737	149.636	48.5366	58.2996
FBgn0010786	1415.44	1403.32	1688.9	1551.56	1583.31	1722.93	-0.099373	0.63492	0.99972	l(3)02640	3L	+	1334889	1339415	2556	protein_coding	NA	1827	1118	1720	2012	1373	1498	36.6999	27.9509	40.2417	46.4438	30.5057	32.6673
FBgn0010803	486.534	409.197	477.213	608.441	398.999	385.301	-0.018957	0.94285	0.99972	Aats-trp	3R	-	9265027	9266904	1683	protein_coding	NA	628	326	486	789	346	335	19.1585	12.3779	17.2688	27.6601	11.6752	11.0949
FBgn0010808	1046.67	1302.9	1229.36	957.003	1245.43	1368.68	0.0029928	0.99003	0.99972	l(3)03670	3R	-	31052616	31053915	940	protein_coding	NA	1351	1038	1252	1241	1080	1190	73.7929	70.5642	79.6499	77.8941	65.2481	70.5636
FBgn0010812	521.397	553.546	545.947	545.977	601.957	530.221	-0.046345	0.82397	0.99972	unc-45	3R	+	8033301	8036652	3236	protein_coding	NA	673	441	556	708	522	461	10.6781	8.70853	10.2748	12.9088	9.16081	7.94061
FBgn0010825	2365.27	1737.2	2287.87	3352.98	1403.41	1530.85	0.018231	0.95458	0.99972	Gug	3L	+	8449922	8472669	8819	protein_coding	NA	3053	1384	2330	4348	1217	1331	18.4566	10.4133	16.406	30.2057	8.13769	8.73532
FBgn0010830	367.999	303.76	431.063	491.996	267.537	316.292	0.028629	0.9214	0.99972	l(3)04053	3L	-	22738602	22741388	2469	protein_coding	NA	475	242	439	638	232	275	9.87778	6.26339	10.6329	15.2462	5.33628	6.20831
FBgn0010877	1844.64	1899.13	1792	2197.02	2240.62	1890.85	-0.17934	0.3747	0.99972	l(3)05822	3R	-	18288866	18298879	3531	protein_coding	NA	2381	1513	1825	2849	1943	1644	44.0697	34.8536	39.3428	60.5964	39.7776	33.0337
FBgn0010894	192.909	134.307	167.908	212.839	245.626	156.421	-0.26283	0.34874	0.99972	sinu	3L	-	5559470	5561598	2065	protein_coding	NA	249	107	171	276	213	136	6.19108	3.31115	4.95205	7.88587	5.85776	3.67097
FBgn0010905	1654.83	985.336	1550.45	2374.38	955.982	1050.09	-0.048946	0.88304	0.99972	Spn	3L	-	2505245	2554292	10266	protein_coding	NA	2136	785	1579	3079	829	913	14.293	6.53761	12.3063	23.6758	6.13566	6.63235
FBgn0010909	3091.97	3529.64	2947.72	3028.32	3981.91	3496.47	-0.12299	0.57765	0.99972	msn	3L	-	2554847	2586540	6833	protein_coding	NA	3991	2812	3002	3927	3453	3040	39.7734	34.8782	34.8453	44.9724	38.0621	32.8897
FBgn0010926	626.761	372.796	562.64	768.841	317.123	463.512	0.0088224	0.9782	0.99972	l(3)07882	3R	-	17535533	17539963	4315	protein_coding	NA	809	297	573	997	275	403	11.487	5.24859	9.47622	16.2677	4.31893	6.2121
FBgn0011016	1800.48	2297.03	1674.17	1597.06	1694.01	1859.8	0.14853	0.51535	0.99972	SsRbeta	3L	+	16129617	16130983	950	protein_coding	NA	2324	1830	1705	2071	1469	1617	125.603	123.096	107.327	128.623	87.8153	94.8742
FBgn0011020	350.955	193.302	308.323	552.146	192.58	243.833	-0.1564	0.65251	0.99972	Sas-4	3R	+	7151367	7154219	2802	protein_coding	NA	453	154	314	716	167	212	8.30074	3.5121	6.70148	15.0767	3.3847	4.21725
FBgn0011202	890.17	869.857	967.19	976.281	1048.24	907.471	-0.09654	0.63851	0.99972	dia	2L	+	20758144	20768053	6718	protein_coding	NA	1149	693	985	1266	909	789	14.719	11.0489	14.6966	18.6366	12.8798	10.9726
FBgn0011204	1844.64	1344.32	1785.13	2497.77	1152.02	1625.17	-0.069956	0.81447	0.99972	cue	3L	-	1503226	1517271	2801	protein_coding	NA	2381	1071	1818	3239	999	1413	43.6449	24.4338	38.8141	68.2273	20.2546	28.1184
FBgn0011205	1018	1114.62	1042.8	684.785	1167.01	1398.59	-0.027878	0.92165	0.99972	fbl	3L	+	20384429	20391913	3513	protein_coding	NA	1314	888	1062	888	1012	1216	34.9382	29.3863	32.889	27.1326	29.7625	35.1005
FBgn0011206	106.913	80.3331	103.102	80.9712	189.121	102.364	-0.27079	0.4121	0.99972	bol	3L	-	9097629	9134405	8169	protein_coding	NA	138	64	105	105	164	89	2.42485	1.39963	2.14891	2.12017	3.18739	1.69774
FBgn0011207	724.377	559.822	647.085	964.714	537.38	633.735	-0.12431	0.65394	0.99972	pelo	2L	+	9700810	9708883	2045	protein_coding	NA	935	446	659	1251	466	551	23.475	13.9366	19.2709	36.0931	12.9409	15.0183
FBgn0011211	14689.7	18898.4	14720.9	12585.2	13872.7	16565.7	0.15093	0.51427	0.99972	blw	2R	+	22799099	22802180	2252	protein_coding	NA	18961	15056	14992	16320	12030	14403	432.295	427.224	398.107	427.575	303.368	356.489
FBgn0011217	5106.28	4663.09	4923.34	6109.86	5180.06	4883.55	-0.12801	0.53749	0.99972	eff	3R	-	14732414	14741319	2375	protein_coding	NA	6591	3715	5014	7923	4492	4246	180.676	126.746	160.087	249.582	136.199	126.358
FBgn0011224	1083.08	540.993	1052.62	1664.92	517.776	662.488	-0.062339	0.86119	0.99972	heph	3R	-	31846987	32015520	12120	protein_coding	NA	1398	431	1072	2159	449	576	20.0051	7.67608	17.867	35.5027	7.10666	8.94812
FBgn0011225	2926.17	3382.78	2826.95	1650.27	2693.82	2723.56	0.32298	0.21684	0.99972	jar	3R	-	24252826	24271233	5641	protein_coding	NA	3777	2695	2879	2140	2336	2368	43.8249	38.9189	38.9079	28.5339	29.98	29.8284
FBgn0011227	1389.87	2125.06	1515.1	1028.72	1762.05	1752.83	0.12347	0.66583	0.99972	ox	2R	-	12757133	12757529	331	protein_coding	NA	1794	1693	1543	1334	1528	1524	278.28	326.846	278.771	237.787	262.16	256.637
FBgn0011230	3980.59	3650.14	3780.39	4185.83	3837.77	3736.85	-0.040641	0.83433	0.99972	poe	2L	-	8054322	8071624	16216	protein_coding	NA	5138	2908	3850	5428	3328	3249	16.2973	11.48	14.2234	19.7849	11.6759	11.1878
FBgn0011232	723.602	497.061	651.012	870.633	456.657	617.632	-0.046636	0.87172	0.99972	scat	2L	+	9431405	9435341	3558	protein_coding	NA	934	396	663	1129	396	537	13.4781	7.1122	11.1434	18.7218	6.32064	8.4126
FBgn0011236	502.028	350.202	452.665	603.043	305.591	307.091	0.081578	0.79094	0.99972	ken	2R	+	23870273	23877442	3070	protein_coding	NA	648	279	461	782	265	267	10.8374	5.80739	8.9799	15.029	4.90207	4.84769
FBgn0011241	179.738	184.515	151.216	181.221	199.499	212.778	-0.1801	0.46183	0.99972	cbx	2R	-	9864510	9875072	1231	protein_coding	NA	232	147	154	235	173	185	13.1913	10.4027	10.1986	15.3547	10.88	11.4195
FBgn0011259	184.387	136.817	185.583	236.744	132.615	105.814	0.070702	0.82526	0.99972	Sema-1a	2L	+	8542147	8672041	10190	protein_coding	NA	238	109	189	307	115	92	1.52139	0.867197	1.40717	2.25515	0.813104	0.638448
FBgn0011260	1606.03	1988.25	1698.72	2143.04	2307.5	1789.64	-0.21645	0.33363	0.99972	Sema-2a	2R	+	16500178	16533459	4171	protein_coding	NA	2073	1584	1730	2779	2001	1556	30.3062	28.8214	29.4578	46.6869	32.3567	24.6954
FBgn0011270	0.774735	0	0	0	0	0	0.032879	0.81996	NA	Pglym87	3R	-	12231645	12232729	1085	protein_coding	NA	1	0	0	0	0	0	0.0473214	0	0	0	0	0
FBgn0011272	22274.4	28560.9	26351.8	17020.1	25676.6	27602.5	0.11822	0.64565	0.99972	RpL13	2L	+	9967313	9968645	1203	protein_coding	NA	28751	22754	26837	22071	22266	23999	1609.79	1585.64	1750.14	1420.08	1378.94	1458.77
FBgn0011274	1172.95	1848.92	1229.36	641.6	1745.91	1544.66	0.086481	0.79362	0.99972	Dif	2L	-	17413248	17433161	5695	protein_coding	NA	1514	1473	1252	832	1514	1343	25.4449	30.811	24.5077	16.0684	28.144	24.5034
FBgn0011279	8.52208	0	0.981919	11.5673	48.4334	35.6548	-1.0777	0.0043587	0.21303	Obp69a	3L	+	12396171	12396957	546	protein_coding	NA	11	0	1	15	42	31	1.0344	0	0.109526	1.62091	4.36846	3.16469
FBgn0011280	112.337	97.906	92.3004	70.9462	129.156	62.1083	0.16555	0.60643	0.99972	Obp19d	X	+	20419613	20420979	1101	protein_coding	NA	145	78	94	92	112	54	8.62669	5.77562	6.51367	6.28981	7.3702	3.48774
FBgn0011282	3.87367	1.25521	0.981919	6.94039	0	1.15015	-0.071477	0.80619	0.99972	Obp84a	3R	-	7250725	7251957	817	protein_coding	NA	5	1	1	9	0	1	0.355074	0.0883846	0.0827124	0.734454	0	0.0770945
FBgn0011284	24352.2	30947.1	27139.3	16881.3	22809.8	25733.5	0.29668	0.22592	0.99972	RpS4	3L	+	13041756	13044234	1449	protein_coding	NA	31433	24655	27639	21891	19780	22374	1442.26	1407.96	1477.07	1154.24	1003.85	1114.49
FBgn0011286	166.568	202.088	223.878	65.5481	631.94	166.772	-0.30608	0.42977	0.99972	RyR	2R	+	8860364	8888097	16405	protein_coding	NA	215	161	228	85	548	145	0.695275	0.647996	0.858767	0.315872	1.96013	0.509051
FBgn0011288	10.0716	17.5729	1.96384	7.71154	8.07223	5.75077	0.17555	0.64665	0.99972	Snap25	3L	+	24074180	24299205	2282	protein_coding	NA	13	14	2	10	7	5	0.298911	0.40064	0.0535612	0.264224	0.178025	0.124808
FBgn0011289	1075.33	1294.12	1264.71	1326.39	1180.85	1157.05	-0.011667	0.95616	0.99972	TfIIA-L	3R	+	27251112	27256463	1645	protein_coding	NA	1388	1031	1288	1720	1024	1006	46.276	42.7812	50.0154	65.8974	37.7617	36.4115
FBgn0011290	482.66	425.515	470.339	755.731	427.828	448.56	-0.20828	0.45514	0.99972	Taf12	3R	-	11678386	11679690	1234	protein_coding	NA	623	339	479	980	371	390	31.6078	21.4059	28.3051	57.1355	20.8193	21.4806
FBgn0011291	165.793	145.604	167.908	228.262	161.445	196.676	-0.25562	0.32208	0.99972	Taf11	2L	-	9762424	9763262	777	protein_coding	NA	214	116	171	296	140	171	14.141	9.54008	13.1609	22.4766	10.2324	12.267
FBgn0011296	395.89	563.587	382.948	310.775	1142.8	818.909	-0.55098	0.11394	0.99972	l(2)efl	2R	-	23684651	23685543	741	protein_coding	NA	511	449	390	403	991	712	35.4549	38.773	31.5168	32.1317	76.0526	53.6303
FBgn0011297	250.239	278.656	255.299	225.948	186.814	236.932	0.24191	0.30893	0.99972	l(2)not	2R	-	23705439	23709792	1704	protein_coding	NA	323	222	260	293	162	206	9.7324	8.32527	9.12458	10.1452	5.39905	6.73844
FBgn0011300	902.566	800.821	879.8	860.608	917.927	862.615	-0.029136	0.88549	0.99972	babo	2R	+	8952339	8962796	5113	protein_coding	NA	1165	638	896	1116	796	750	12.4849	8.5096	11.1838	13.7435	9.43537	8.72563
FBgn0011305	383.494	372.796	328.943	422.593	415.143	434.758	-0.21031	0.33084	0.99972	Rsf1	2L	-	10261795	10263554	1760	protein_coding	NA	495	297	335	548	360	378	19.0091	14.1951	14.9838	24.183	15.2912	15.7588
FBgn0011327	724.377	399.155	561.658	1262.38	420.909	494.566	-0.26783	0.44391	0.99972	Uch-L5	3L	-	9475493	9476965	1394	protein_coding	NA	935	318	572	1637	365	430	37.6816	15.9504	26.8495	75.8123	16.2703	18.8131
FBgn0011335	257.212	198.322	256.281	368.612	139.534	193.226	0.014518	0.96477	0.99972	l(3)j2D3	3L	+	12116101	12118055	1513	protein_coding	NA	332	158	261	478	121	168	11.2664	6.67318	10.316	18.6402	4.5417	6.18916
FBgn0011336	1749.35	2474.01	1732.11	1526.89	2026.13	2043.82	0.078883	0.75521	0.99972	OstStt3	3R	-	25066712	25069637	2703	protein_coding	NA	2258	1971	1764	1980	1757	1777	42.8909	46.5967	39.0267	43.2195	36.9146	36.644
FBgn0011361	1821.4	2063.56	1791.02	1530.74	1747.06	2025.42	0.089553	0.68504	0.99972	mtacp1	3L	+	1329949	1331631	842	protein_coding	NA	2351	1644	1824	1985	1515	1761	172.195	149.864	155.602	167.072	122.734	140.024
FBgn0011455	1574.26	2359.79	1867.61	1270.09	1758.59	1760.88	0.24249	0.34517	0.99972	l(3)neo18	3L	-	12137496	12138584	888	protein_coding	NA	2032	1880	1902	1647	1525	1531	130.25	149.982	142	121.317	108.121	106.538
FBgn0011474	1228.73	596.223	1059.49	1826.86	419.756	826.96	-0.062258	0.86472	0.99972	pr-set7	3R	+	14316038	14320494	4183	protein_coding	NA	1586	475	1079	2369	364	719	22.8996	8.53585	18.1455	39.3065	5.81315	11.2701
FBgn0011476	89.0945	86.6092	67.7524	114.902	93.4072	106.964	-0.31858	0.25397	0.99972	l(3)neo43	3R	-	15277981	15278668	627	protein_coding	NA	115	69	69	149	81	93	10.8539	8.10522	7.58506	16.1602	8.45586	9.52896
FBgn0011481	1999.59	1227.59	1779.24	2905.71	1006.72	1387.09	-0.06213	0.85345	0.99972	Ssdp	3R	-	18192494	18199595	5521	protein_coding	NA	2581	978	1812	3768	873	1206	31.4844	14.8482	25.7447	52.8193	11.779	15.9709
FBgn0011509	512.1	405.431	425.171	512.046	522.388	493.416	-0.16859	0.4485	0.99972	SrpRbeta	3L	-	8718949	8720225	1135	protein_coding	NA	661	323	433	664	453	429	32.0171	19.472	24.4282	36.9592	24.2697	22.5587
FBgn0011554	7.74735	16.3177	2.94576	10.025	0	3.45046	0.26022	0.45673	0.99972	etaTry	2R	-	11340513	11341423	911	protein_coding	NA	10	13	3	13	0	3	0.563597	0.911884	0.19693	0.841949	0	0.183554
FBgn0011556	48.8083	75.3123	28.4757	14.6519	58.8119	86.2615	-0.035314	0.92733	0.99972	zetaTry	2R	-	11339186	11340132	947	protein_coding	NA	63	60	29	19	51	75	3.41568	4.0487	1.83129	1.18376	3.05838	4.41441
FBgn0011559	0	3.76562	0	7.71154	0	3.45046	-0.17157	0.4882	0.99972	Acp36DE	2L	-	18356047	18359026	2921	protein_coding	NA	0	3	0	10	0	3	0	0.0665185	0	0.204723	0	0.0580215
FBgn0011566	231.646	180.75	231.733	275.302	156.832	181.724	0.056462	0.84462	0.99972	Bzd	X	-	2606680	2608876	1762	protein_coding	NA	299	144	236	357	136	158	8.71269	5.22242	8.00968	11.9543	4.38334	4.99819
FBgn0011569	0	2.51041	0	0	0	0	0.066928	0.64315	NA	can	3L	-	10263909	10267111	2953	protein_coding	NA	0	2	0	0	0	0	0	0.0432794	0	0	0	0
FBgn0011570	1039.69	887.43	901.402	1300.17	972.127	947.726	-0.16842	0.47488	0.99972	cpb	2L	+	1704902	1706962	1926	protein_coding	NA	1342	707	918	1686	843	824	41.709	27.3479	33.2309	60.2155	28.9794	27.8022
FBgn0011571	1307.75	1205	1230.34	1528.43	1187.77	1173.16	-0.050811	0.81863	0.99972	caz	X	+	16288810	16293520	1666	protein_coding	NA	1688	960	1253	1982	1030	1020	53.731	38.0322	46.4543	72.4987	36.2639	35.2474
FBgn0011573	1249.65	1114.62	1181.25	1602.46	1194.69	1199.61	-0.15683	0.49293	0.99972	Cdc37	3L	+	1795392	1797307	1611	protein_coding	NA	1613	888	1203	2078	1036	1043	51.4074	35.2235	44.6559	76.1046	36.5204	36.087
FBgn0011581	158.821	596.223	307.341	141.892	636.553	383.001	-0.079691	0.83382	0.99972	Ms	3R	+	24341551	24343825	1178	protein_coding	NA	205	475	313	184	552	333	10.8959	31.4218	19.3765	11.2383	32.4514	19.2145
FBgn0011582	0	6.27603	2.94576	0	0	0	0.2325	0.26	0.99972	Dop1R1	3R	-	14165379	14214810	14565	protein_coding	NA	0	5	3	0	0	0	0	0.0634831	0.0356454	0	0	0
FBgn0011584	2761.93	3751.81	2715.01	1900.9	3626.74	3727.65	-0.0033451	0.99091	0.99972	Trp1	2L	+	10009381	10013170	2459	protein_coding	NA	3565	2989	2765	2465	3145	3241	102.314	106.765	92.4259	81.2956	99.8349	100.979
FBgn0011586	1000.96	745.592	809.101	1024.09	854.503	891.369	-0.10462	0.65038	0.99972	e(r)	X	-	8904144	8906248	1687	protein_coding	NA	1292	594	824	1328	741	775	55.4186	31.7108	41.1663	65.4583	35.1557	36.0885
FBgn0011589	16.2694	33.8905	6.87343	8.4827	11.5318	6.90092	0.5214	0.18217	0.99972	Elk	2R	+	17873939	17926695	5351	protein_coding	NA	21	27	7	11	10	6	0.204984	0.328014	0.0795832	0.123386	0.107966	0.063581
FBgn0011591	171.216	145.604	129.613	103.335	194.887	119.616	0.081629	0.78799	0.99972	fng	3L	-	20925891	20949512	1959	protein_coding	NA	221	116	132	134	169	104	5.79222	3.78389	4.02948	4.03581	4.89919	2.95911
FBgn0011592	450.121	338.905	328.943	461.921	249.086	256.484	0.17008	0.56962	0.99972	fra	2R	+	12529053	12564184	6320	protein_coding	NA	581	270	335	599	216	223	4.84264	2.8009	3.25217	5.73729	1.99134	2.01784
FBgn0011596	18.5936	17.5729	12.7649	4.62693	11.5318	10.3514	0.49503	0.20325	0.99972	fzo	3R	-	23201644	23204034	2391	protein_coding	NA	24	14	13	6	10	9	0.515369	0.374165	0.325142	0.148058	0.237516	0.209809
FBgn0011603	178.964	248.531	211.113	180.45	561.596	179.424	-0.37258	0.29587	0.99972	ine	2L	-	4468000	4477022	3965	protein_coding	NA	231	198	215	234	487	156	3.64262	3.88594	3.94878	4.24026	8.49408	2.67056
FBgn0011604	1121.82	584.926	1020.21	1988.81	540.839	907.471	-0.2353	0.50956	0.99972	Iswi	2R	+	12636671	12640628	3647	protein_coding	NA	1448	466	1039	2579	469	789	20.7033	8.2925	17.3025	42.3737	7.41702	12.2468
FBgn0011606	833.615	371.541	828.74	1506.84	272.149	657.888	-0.16546	0.66042	0.99972	Klp3A	X	-	2599158	2604052	4527	protein_coding	NA	1076	296	844	1954	236	572	12.821	4.38965	11.7132	26.7552	3.11034	7.39914
FBgn0011638	1284.51	874.878	1423.78	1438.2	930.612	1048.94	0.058115	0.83355	0.99972	La	2L	-	20348393	20350012	1549	protein_coding	NA	1658	697	1450	1865	807	912	54.9566	28.7539	55.9791	71.0376	29.5865	32.8175
FBgn0011640	1282.96	970.274	1268.64	1597.83	855.656	874.117	0.067709	0.81667	0.99972	lark	3L	+	7339266	7341893	2192	protein_coding	NA	1656	773	1292	2072	742	760	46.6402	27.0962	42.3823	67.06	23.1147	23.2375
FBgn0011642	774.735	764.42	676.542	748.02	702.284	859.165	-0.054625	0.80095	0.99972	Zyx	4	-	1057365	1065001	2377	protein_coding	NA	1000	609	689	970	609	747	25.762	19.5265	20.6738	28.7161	17.3533	20.8918
FBgn0011648	1088.5	942.659	1102.7	1560.82	810.682	894.819	-0.050785	0.8591	0.99972	Mad	2L	-	3146056	3159643	3412	protein_coding	NA	1405	751	1123	2024	703	778	24.2317	16.1204	22.5585	40.1137	13.4106	14.5667
FBgn0011653	0	3.76562	0	6.94039	2.30635	3.45046	-0.28571	0.3288	0.99972	mas	3L	-	4161666	4167464	3657	protein_coding	NA	0	3	0	9	2	3	0	0.052436	0	0.145244	0.0310667	0.045738
FBgn0011655	667.047	435.556	684.398	858.295	462.423	571.626	-0.068546	0.81684	0.99972	Med	3R	+	31611046	31615375	3425	protein_coding	NA	861	347	697	1113	401	497	13.6694	6.85653	12.8885	20.3056	7.04168	8.566
FBgn0011656	702.685	709.191	746.259	765.756	757.636	581.978	0.031953	0.88715	0.99972	Mef2	2R	-	9913496	9958858	9188	protein_coding	NA	907	565	760	993	657	506	10.4555	8.10612	10.204	13.1541	8.37697	6.33231
FBgn0011659	183.612	123.01	213.076	404.085	94.5604	141.469	-0.20015	0.58873	0.99972	Mlh1	2R	+	8170274	8172401	2075	protein_coding	NA	237	98	217	524	82	123	5.87848	3.02531	6.269	14.9356	2.24965	3.31205
FBgn0011660	379.62	175.729	353.491	662.422	139.534	258.785	-0.14453	0.69908	0.99972	Pms2	2R	-	15368074	15371520	3040	protein_coding	NA	490	140	360	859	121	225	8.27579	2.94286	7.08171	16.6717	2.26039	4.12544
FBgn0011661	4079.75	3837.16	3801.99	4724.86	5356.5	3970.33	-0.23988	0.2686	0.99972	Moe	X	-	8873012	8898332	4558	protein_coding	NA	5266	3057	3872	6127	4645	3452	106.995	77.3045	91.6303	143.055	104.388	76.1425
FBgn0011666	859.956	458.15	791.427	1289.37	538.533	698.143	-0.19981	0.54474	0.99972	msi	3R	+	25516118	25608423	11500	protein_coding	NA	1110	365	806	1672	467	607	14.1629	5.79629	11.978	24.5154	6.59069	8.40799
FBgn0011672	1756.32	2928.39	1826.37	2094.46	4282.89	3147.97	-0.44547	0.14507	0.99972	Mvl	3R	-	21051383	21060800	5647	protein_coding	NA	2267	2333	1860	2716	3714	2737	39.6715	50.8124	37.9107	54.6173	71.8875	51.9968
FBgn0011674	311.443	527.186	325.997	259.879	424.368	369.199	0.11935	0.6865	0.99972	insc	2R	-	20821262	20836028	3887	protein_coding	NA	402	420	332	337	368	321	5.31005	6.90478	5.10778	5.11536	5.37657	4.60312
FBgn0011676	8.52208	12.5521	8.83727	0.771154	1.15318	1.15015	1.0265	0.0064713	0.27993	Nos	2L	-	10804274	10837511	5224	protein_coding	NA	11	10	9	1	1	1	0.125507	0.142005	0.119602	0.0131114	0.01262	0.0123865
FBgn0011692	702.685	284.932	673.597	1426.64	226.022	504.917	-0.22781	0.55134	0.99972	pav	3L	+	4242734	4246233	3207	protein_coding	NA	907	227	686	1850	196	439	14.521	4.52316	12.7919	34.0356	3.4708	7.63005
FBgn0011693	2.3242	1.25521	0	9.25385	4.6127	18.4025	-0.8477	0.019664	0.54816	Pdh	3L	-	16353233	16354297	945	protein_coding	NA	3	1	0	12	4	16	0.165625	0.0687119	0	0.761305	0.244258	0.958956
FBgn0011695	5011.76	6997.77	7441.97	5155.17	12883.3	10989.7	-0.45821	0.14762	0.99972	PebIII	2R	+	24026172	24027518	1160	protein_coding	NA	6469	5575	7579	6685	11172	9555	454.989	488.019	620.866	540.305	869.12	729.574
FBgn0011701	9.29682	21.3385	13.7469	3.08462	17.2976	17.2523	0.11467	0.76874	0.99972	repo	3R	+	18236192	18239602	2996	protein_coding	NA	12	17	14	4	15	15	0.205649	0.362595	0.279444	0.0787733	0.284329	0.279069
FBgn0011703	2139.04	842.243	1652.57	4065.53	530.461	1553.86	-0.24189	0.52887	0.99972	RnrL	2L	-	10325026	10327943	2577	protein_coding	NA	2761	671	1683	5272	460	1351	55.0096	16.6388	39.0552	120.704	10.1371	29.2215
FBgn0011704	1826.82	1005.42	1563.22	2698.27	520.082	1621.72	-0.093313	0.79953	0.99972	RnrS	2R	-	11983145	11985393	1593	protein_coding	NA	2358	801	1592	3499	451	1410	76.0002	32.1315	59.7635	129.595	16.078	49.3361
FBgn0011705	424.555	509.613	488.014	605.356	512.01	571.626	-0.22777	0.30283	0.99972	rost	2L	-	8985936	8989539	1671	protein_coding	NA	548	406	497	785	444	497	18.8708	17.4006	19.9337	31.0637	16.9113	18.5798
FBgn0011706	3.87367	17.5729	4.9096	14.6519	2.30635	3.45046	0.10385	0.77846	0.99972	rpr	3L	-	18397535	18398435	901	protein_coding	NA	5	14	5	19	2	3	0.284926	0.992929	0.331859	1.2442	0.12606	0.185592
FBgn0011708	1258.17	1186.17	1219.54	1347.21	1290.4	1228.36	-0.072272	0.71214	0.99972	Syx5	2L	+	16307346	16309274	1861	protein_coding	NA	1624	945	1242	1747	1119	1068	45.9406	33.2713	40.9217	56.7907	35.0127	32.7987
FBgn0011710	1166.75	1015.46	1000.58	1655.67	1155.48	1153.6	-0.2826	0.2469	0.99972	2019-09-01	X	+	21358286	21361688	2026	protein_coding	NA	1506	809	1019	2147	1002	1003	38.1656	25.5167	30.0776	62.5249	28.0867	27.5945
FBgn0011715	540.765	365.265	518.453	956.231	389.773	460.061	-0.2663	0.41381	0.99972	Snr1	3R	+	5470926	5472754	1335	protein_coding	NA	698	291	528	1240	338	400	26.8449	13.9292	23.6517	54.8026	14.3783	16.7009
FBgn0011722	1248.1	1723.4	1112.51	1446.69	2661.53	3049.06	-0.65997	0.029511	0.68554	Tig	2L	-	6415179	6423310	7018	protein_coding	NA	1611	1373	1133	1876	2308	2651	11.8604	12.5807	9.71532	15.8713	18.7943	21.188
FBgn0011723	101.49	100.416	79.5355	43.9558	268.69	93.1624	-0.32201	0.39737	0.99972	byn	3L	+	11927693	11935919	2650	protein_coding	NA	131	80	81	57	233	81	2.55354	1.94084	1.83899	1.27679	5.02356	1.71408
FBgn0011725	1751.68	963.998	1572.05	2635.03	822.214	1380.18	-0.12812	0.71021	0.99972	twin	3R	-	24196893	24221965	4723	protein_coding	NA	2261	768	1601	3417	713	1200	40.7326	17.2199	33.5935	70.7393	14.2075	23.4692
FBgn0011726	3445.25	3382.78	3462.25	4802.75	3817.01	3767.9	-0.24635	0.24566	0.99972	tsr	2R	-	24044453	24046805	735	protein_coding	NA	4447	2695	3526	6228	3310	3276	310.647	234.308	286.882	499.945	255.748	248.438
FBgn0011737	454.769	276.145	411.424	584.535	168.364	320.893	0.064007	0.85443	0.99972	Wee1	2L	-	6911090	6914138	2652	protein_coding	NA	587	220	419	758	146	279	11.9314	5.5655	9.9195	17.705	3.2824	6.15648
FBgn0011739	1509.18	1019.23	1162.59	1614.03	969.82	1130.6	-0.0079114	0.97703	0.99972	wts	3R	-	30789625	30806619	5803	protein_coding	NA	1948	812	1184	2093	841	983	17.2355	8.94166	12.2014	21.2803	8.23029	9.44197
FBgn0011740	597.321	489.53	559.694	660.108	354.025	522.17	0.084615	0.7597	0.99972	alpha-Man-II	3R	+	9412548	9417264	4002	protein_coding	NA	771	390	570	856	307	454	9.89402	6.22889	8.51952	12.6231	4.35754	6.32483
FBgn0011741	274.256	362.754	323.051	360.9	307.898	359.998	-0.091701	0.69998	0.99972	Arp6	X	-	15735774	15737120	1347	protein_coding	NA	354	289	329	468	267	313	13.4934	13.7102	14.6062	20.4993	11.2568	12.952
FBgn0011742	1300.01	1263.99	1282.39	1830.72	1116.27	1128.3	-0.073226	0.77999	0.99972	Arp2	X	-	16548290	16553968	2729	protein_coding	NA	1678	1007	1306	2374	968	981	37.3935	27.9294	33.8977	60.7937	23.8597	23.7328
FBgn0011745	801.076	963.998	856.233	1064.96	1021.71	1032.84	-0.23282	0.25978	0.99972	Arp1	3R	+	12691743	12694232	1469	protein_coding	NA	1034	768	872	1381	886	898	36.1398	33.4083	35.498	55.4667	34.2518	34.0735
FBgn0011746	74.3745	121.755	92.3004	52.4385	72.65	14.952	0.6723	0.071472	0.99972	ana	2R	+	9062295	9077554	2611	protein_coding	NA	96	97	94	68	63	13	2.13839	2.68915	2.43874	1.7406	1.55218	0.314365
FBgn0011747	3124.51	3037.6	2709.11	2673.59	2842.58	2631.55	0.11434	0.56347	0.99972	Ank	4	-	115074	129849	6229	protein_coding	NA	4033	2420	2759	3467	2465	2288	38.806	28.9811	30.9204	38.3353	26.2345	23.9002
FBgn0011754	2225.81	2435.1	1892.16	1293.23	1824.32	2153.09	0.27478	0.29007	0.99972	PhKgamma	X	+	11695137	11704394	3300	protein_coding	NA	2873	1940	1927	1677	1582	1872	56.6911	47.6441	44.2877	38.0265	34.528	40.1015
FBgn0011758	1.54947	0	6.87343	3.85577	5.76588	1.15015	-0.070729	0.82332	0.99972	B-H1	X	+	17397478	17403278	2724	protein_coding	NA	2	0	7	5	5	1	0.037725	0	0.153787	0.108378	0.104317	0.0204773
FBgn0011760	3070.27	3042.62	3218.73	3870.42	3533.33	3066.31	-0.1536	0.45811	0.99972	ctp	X	+	4687800	4702034	4645	protein_coding	NA	3963	2424	3278	5019	3064	2666	70.4309	53.6167	67.8532	102.502	60.23	51.4368
FBgn0011761	14263.6	6439.2	14452.9	25906.9	5453.36	12222.7	-0.20459	0.58061	0.99972	dhd	X	+	5312171	5313125	955	protein_coding	NA	18411	5130	14719	33595	4729	10627	1096.62	380.299	1021.13	2299.47	311.554	687.171
FBgn0011762	194.458	77.8227	188.528	320.029	58.8119	126.517	-0.081647	0.8307	0.99972	DNApol-alpha50	3L	+	8340314	8344404	1569	protein_coding	NA	251	62	192	415	51	110	8.21368	2.52513	7.31791	15.6058	1.84595	3.90779
FBgn0011763	1817.53	1226.34	1667.3	2603.42	1055.16	1354.88	-0.070938	0.82425	0.99972	Dp	2R	+	13222433	13228202	3198	protein_coding	NA	2346	977	1698	3376	915	1178	52.4618	27.1918	44.2257	86.7543	22.6319	28.598
FBgn0011764	882.423	692.873	728.584	918.445	513.163	437.058	0.24712	0.40965	0.99972	Dsp1	X	+	16333612	16340624	4860	protein_coding	NA	1139	552	742	1191	445	380	16.9705	10.2362	12.8765	20.3919	7.33359	6.14653
FBgn0011766	2480.7	1671.93	2157.28	2895.68	1837.01	1916.16	-0.064994	0.81043	0.99972	E2f1	3R	-	21620304	21660871	6451	protein_coding	NA	3202	1332	2197	3755	1593	1666	40.5732	21.0063	32.4242	54.6766	22.3264	22.9175
FBgn0011768	2847.93	3922.52	2891.75	3923.63	4390.14	5939.39	-0.491	0.057256	0.95062	Fdh	3R	-	10870906	10872381	1337	protein_coding	NA	3676	3125	2945	5088	3807	5164	141.166	149.36	131.723	224.531	161.705	215.286
FBgn0011769	65.8525	67.7811	91.3185	80.2	79.5691	102.364	-0.18149	0.53696	0.99972	Fdxh	3L	-	9370195	9371238	741	protein_coding	NA	85	54	93	104	69	89	6.06984	4.79932	7.73505	8.53425	5.44994	6.89958
FBgn0011770	1723.01	2993.66	1951.07	1445.14	2391.68	3157.17	-0.05519	0.85971	0.99972	Gip	X	-	10328877	10329872	996	protein_coding	NA	2224	2385	1987	1874	2074	2745	114.647	153.018	119.302	111.012	118.255	153.619
FBgn0011771	599.645	622.582	612.718	603.043	623.868	645.236	-0.026805	0.89419	0.99972	Hem	3L	-	22284354	22288195	3777	protein_coding	NA	774	496	624	782	541	561	10.5216	8.39169	9.87976	12.2158	8.13434	8.27899
FBgn0011774	463.291	316.312	431.063	713.318	205.265	351.947	-0.05166	0.88173	0.99972	Irbp	3R	+	11410047	11412440	2149	protein_coding	NA	598	252	439	925	178	306	14.6277	7.6719	12.5072	26.001	4.81592	8.12588
FBgn0011785	1220.98	1029.27	1225.44	1963.36	720.734	864.915	-0.023747	0.9423	0.99972	BRWD3	3R	+	24319000	24328619	7244	protein_coding	NA	1576	820	1248	2546	625	752	11.1703	7.23353	10.3026	20.7367	4.89974	5.7863
FBgn0011787	848.335	599.988	795.355	1120.49	470.495	741.849	-0.045625	0.88298	0.99972	mRpL12	3L	+	8956791	8957584	738	protein_coding	NA	1095	478	810	1453	408	645	76.1806	41.3891	65.6353	116.164	31.3961	48.7153
FBgn0011802	471.039	217.151	428.117	810.483	186.814	347.346	-0.1786	0.62866	0.99972	Gem3	3L	-	10459081	10463101	3963	protein_coding	NA	608	173	436	1051	162	302	8.45301	2.99352	7.06019	16.7913	2.49119	4.55816
FBgn0011812	2.3242	0	0	0	0	0	0.087209	0.54755	NA	Lcp1Psi	2R	-	8432886	8433384	456	pseudogene	NA	3	0	0	0	0	0	0.337787	0	0	0	0	0
FBgn0011817	686.415	401.666	664.759	970.883	443.972	427.857	-0.055816	0.86572	0.99972	nmo	3L	+	7979046	8054147	6945	protein_coding	NA	886	320	677	1259	385	372	12.9713	5.83081	11.5441	21.1812	6.23443	5.91247
FBgn0011818	687.965	380.327	654.94	1124.34	379.395	494.566	-0.15632	0.65243	0.99972	oaf	2L	+	2492955	2498846	3223	protein_coding	NA	888	303	667	1458	329	430	16.5613	7.03317	14.4887	31.2473	6.78675	8.70611
FBgn0011822	209.953	303.76	279.847	110.275	407.071	239.232	0.050715	0.88501	0.99972	pcl	X	-	436139	437448	1310	protein_coding	NA	271	242	285	143	353	208	10.6215	11.8048	13.0102	6.44059	15.303	8.85021
FBgn0011824	539.99	483.254	589.151	609.983	397.845	401.404	0.1682	0.51971	0.99972	CG4038	2R	-	21095958	21097305	957	protein_coding	NA	697	385	600	791	345	349	37.3945	25.7077	37.4928	48.7669	20.4729	20.3271
FBgn0011826	1644.76	1203.74	1483.68	2060.52	1011.33	1442.29	-0.04985	0.86312	0.99972	Pp2B-14D	X	-	16554627	16560016	5390	protein_coding	NA	2123	959	1511	2672	877	1254	24.7846	13.9341	20.5456	35.8461	11.3244	15.8929
FBgn0011828	2407.88	6515.77	2878.99	2937.33	8498.9	5154.99	-0.34459	0.33542	0.99972	Pxn	3L	-	2601455	2630064	5955	protein_coding	NA	3108	5191	2932	3809	7370	4482	34.9641	72.6809	38.4173	49.2409	91.7051	54.7379
FBgn0011829	3.87367	11.2968	5.89151	0	13.8381	6.90092	0.0081599	0.98126	0.99972	Ret	2L	-	21182446	21198762	4912	protein_coding	NA	5	9	6	0	12	6	0.0535835	0.120041	0.0748918	0	0.142242	0.069805
FBgn0011832	171.991	37.6562	222.896	35.4731	1318.08	101.214	-0.37871	NA	NA	Ser12	2L	-	2250431	2251275	845	protein_coding	NA	222	30	227	46	1143	88	13.4891	2.26871	16.0649	3.2119	76.8177	5.80481
FBgn0011834	4.64841	0	7.85535	4.62693	3.45953	8.05107	-0.094194	0.78831	0.99972	Ser6	X	-	20962605	20963505	901	protein_coding	NA	6	0	8	6	3	7	0.341911	0	0.530975	0.392905	0.18909	0.433047
FBgn0011836	434.626	331.374	470.339	530.554	264.077	379.551	0.060738	0.83722	0.99972	Taf2	3L	-	9884411	9888683	3972	protein_coding	NA	561	264	479	688	229	330	7.35729	4.3091	7.31666	10.3685	3.32182	4.69833
FBgn0011837	2842.5	3545.96	2742.5	2481.57	2816.05	2526.89	0.20363	0.35099	0.99972	Tis11	X	+	12659415	12682554	5009	protein_coding	NA	3669	2825	2793	3218	2442	2197	61.5018	58.9368	54.5297	61.9869	45.2763	39.9802
FBgn0011845	0.774735	8.78644	0	0.771154	0	0	0.24329	0.28814	0.99972	tRNA:D:96A	3R	+	24555302	24555373	72	tRNA	NA	1	7	0	1	0	0	0.713106	6.2127	0	0.819461	0	0
FBgn0011859	5.42314	1.25521	3.92768	2.31346	1.15318	2.30031	0.22266	0.51126	0.99972	tRNA:G3:22BCa	2L	-	1938089	1938159	71	tRNA	NA	7	1	4	3	1	2	5.06205	0.900029	3.36907	2.49301	0.799859	1.57012
FBgn0011877	0.774735	0	0	0.771154	3.45953	0	-0.13265	0.49563	NA	tRNA:HPsi	2R	+	12336733	12336804	72	pseudogene	NA	1	0	0	1	3	0	0.713106	0	0	0.819461	2.36625	0
FBgn0011878	1.54947	1.25521	0	0	0	0	0.090114	0.53465	NA	tRNA:H:48F	2R	+	12336418	12336489	72	tRNA	NA	2	1	0	0	0	0	1.42621	0.887529	0	0	0	0
FBgn0011890	0	1.25521	0	0	0	0	0.032879	0.81996	NA	tRNA:K2:42Ad	2R	-	6171496	6171568	73	tRNA	NA	0	1	0	0	0	0	0	0.875371	0	0	0	0
FBgn0011892	0.774735	0	0.981919	0	0	0	0.066928	0.64315	NA	tRNA:K2:42Ea	2R	-	6946808	6946880	73	tRNA	NA	1	0	1	0	0	0	0.703338	0	0.819193	0	0	0
FBgn0011894	0	5.02082	0	0	1.15318	0	0.095462	0.58336	NA	tRNA:K2:42Ec	2R	-	6948284	6948356	73	tRNA	NA	0	4	0	0	1	0	0	3.50148	0	0	0.777945	0
FBgn0011902	0	1.25521	0	0	0	0	0.032879	0.81996	NA	tRNA:K5:29A	2L	+	8290727	8290799	73	tRNA	NA	0	1	0	0	0	0	0	0.875371	0	0	0	0
FBgn0011937	0	3.76562	0	0	0	0	0.1047	0.47346	NA	tRNA:N5:42Ag	2R	+	6153186	6153259	74	tRNA	NA	0	3	0	0	0	0	0	2.59062	0	0	0	0
FBgn0011955	0.774735	0	1.96384	0	4.6127	0	-0.0539	0.79672	NA	tRNA:R2:42Aa	2R	-	6178584	6178656	73	tRNA	NA	1	0	2	0	4	0	0.703338	0	1.63839	0	3.11178	0
FBgn0011959	2.3242	0	0	0	0	0	0.087209	0.54755	NA	tRNA:R2:84Fa	3R	-	8140970	8141042	73	tRNA	NA	3	0	0	0	0	0	2.11001	0	0	0	0	0
FBgn0011982	0	5.02082	0	0	0	0	0.11198	0.4512	NA	tRNA:S7:12Ed	X	-	14025566	14025647	82	tRNA	NA	0	4	0	0	0	0	0	3.11717	0	0	0	0
FBgn0011987	0.774735	0	0	0.771154	0	2.30031	-0.095351	0.59765	NA	tRNA:SeC	2R	-	11357564	11357650	87	tRNA	NA	1	0	0	1	0	2	0.590157	0	0	0.678174	0	1.28136
FBgn0012016	2.3242	0	0	0.771154	0	0	0.050196	0.73071	NA	tRNA:Y1:22Fa	2L	+	2462593	2462686	73	tRNA	NA	3	0	0	1	0	0	2.11001	0	0	0.808235	0	0
FBgn0012034	14863.3	22233.5	16553.2	11369.1	20305.1	32012.2	-0.1926	0.55296	0.99972	AcCoAS	3L	-	21270722	21280243	3605	protein_coding	NA	19185	17713	16858	14743	17608	27833	347.33	399.117	355.475	306.719	352.595	547.035
FBgn0012036	14922.9	21180.3	16930.2	7487.91	12491.2	16405.8	0.44821	0.13168	0.99972	Aldh	2L	+	9387389	9391567	2070	protein_coding	NA	19262	16874	17242	9710	10832	14264	498.228	543.216	519.441	288.615	309.899	400.537
FBgn0012037	623.662	1015.46	575.405	505.106	1186.62	801.657	-0.13381	0.67843	0.99972	Ance	2L	+	13905645	13909212	2183	protein_coding	NA	805	809	586	655	1029	697	20.2805	25.3664	17.195	18.9626	28.6737	19.063
FBgn0012042	574.853	971.529	459.538	336.994	1097.82	1222.61	-0.28169	0.434	0.99972	AttA	2R	+	14747362	14748215	790	protein_coding	NA	742	774	468	437	952	1063	48.2241	62.6078	35.4265	32.6374	68.4355	75.0011
FBgn0012051	483.435	911.279	559.694	636.973	973.28	853.414	-0.27745	0.34616	0.99972	CalpA	2R	+	19425113	19430564	3440	protein_coding	NA	624	726	570	826	844	742	11.7357	16.9937	12.4859	17.8516	17.5571	15.1497
FBgn0012058	893.269	599.988	834.631	1428.18	629.634	786.705	-0.2316	0.459	0.99972	Cdc27	3L	-	7245481	7249340	3713	protein_coding	NA	1153	478	850	1852	546	684	16.5546	8.54172	14.2145	30.5565	8.67096	10.6615
FBgn0012344	3.87367	21.3385	7.85535	14.6519	47.2802	35.6548	-0.77194	0.04827	0.87195	Dh44	3R	+	9638182	9650706	2402	protein_coding	NA	5	17	8	19	41	31	0.135686	0.574173	0.252859	0.592507	1.23065	0.913276
FBgn0013263	179.738	173.218	179.691	107.962	236.401	198.977	-0.019784	0.94851	0.99972	Trl	3L	-	14747929	14761049	6254	protein_coding	NA	232	138	183	140	205	173	3.8326	2.83735	3.52111	2.65771	3.7458	3.10261
FBgn0013269	2125.1	1238.89	2009.01	3489.47	1140.49	1443.44	-0.1294	0.70888	0.99972	FK506-bp1	3R	-	15331584	15333133	1299	protein_coding	NA	2743	987	2046	4525	989	1255	108.419	48.5538	94.1901	205.528	43.2373	53.8513
FBgn0013272	9672.57	12692.6	10080.4	6387.47	13816.2	13195.7	-0.034263	0.90907	0.99972	Gp150	2R	+	22317662	22329416	4916	protein_coding	NA	12485	10112	10266	8283	11981	11473	150.44	151.649	144.078	114.693	159.681	150.081
FBgn0013275	235.519	371.541	240.57	232.889	581.2	576.227	-0.54446	0.10144	0.99972	Hsp70Aa	3R	-	11954163	11956544	2382	protein_coding	NA	304	296	245	302	504	501	6.55268	7.94081	6.15082	7.48042	12.016	11.7235
FBgn0013276	1031.17	1665.66	989.775	831.304	2286.75	1923.06	-0.34326	0.30352	0.99972	Hsp70Ab	3R	+	11958535	11960909	2375	protein_coding	NA	1331	1327	1008	1078	1983	1672	28.7741	35.7044	25.3808	26.7803	47.4167	39.2405
FBgn0013277	357.928	738.061	414.37	370.925	980.199	731.498	-0.34576	0.30983	0.99972	Hsp70Ba	3R	-	12465453	12467776	2324	protein_coding	NA	462	588	422	481	850	636	10.2069	16.168	10.8589	12.2115	20.7709	15.254
FBgn0013278	2816.94	4878.98	3430.83	1776.74	4974.8	4193.46	0.018156	0.95649	0.99972	Hsp70Bb	3R	+	12505793	12508139	2347	protein_coding	NA	3636	3887	3494	2304	4314	3646	79.5422	105.832	89.0264	57.9202	104.385	86.5895
FBgn0013279	925.808	1960.63	1165.54	473.489	1280.02	1015.59	0.40906	0.23006	0.99972	Hsp70Bc	3R	+	12509076	12511461	2386	protein_coding	NA	1195	1562	1187	614	1110	883	25.7149	41.8336	29.7502	15.183	26.4195	20.6278
FBgn0013303	302.921	268.614	283.775	399.458	292.906	383.001	-0.29529	0.22105	0.99972	Nca	3L	+	19991887	19997568	899	protein_coding	NA	391	214	289	518	254	333	22.3308	15.2114	19.2242	33.9962	16.0452	20.6465
FBgn0013305	2351.32	3072.74	2287.87	1906.29	4040.73	3504.52	-0.24254	0.41227	0.99972	Nmda1	2R	-	12877094	12880230	2590	protein_coding	NA	3035	2448	2330	2472	3504	3047	89.4535	89.8004	79.9865	83.7261	114.232	97.4958
FBgn0013307	2954.84	3842.18	3776.46	1008.67	1956.94	2638.45	0.73076	0.019937	0.549	Odc1	2R	+	8004824	8006672	1253	protein_coding	NA	3814	3061	3846	1308	1697	2294	156.285	156.109	183.555	61.591	76.9135	102.048
FBgn0013308	188.261	222.171	160.053	8.4827	18.4508	39.1052	2.1021	6.9624e-09	2.1245e-06	Odc2	2R	+	8007246	8009062	1268	protein_coding	NA	243	177	163	11	16	34	9.83952	8.92008	7.68736	0.51184	0.716593	1.49459
FBgn0013323	6.97261	23.8489	21.6022	3.85577	1.15318	8.05107	0.80714	0.036604	0.7768	Ptth	2L	-	575711	576896	1128	protein_coding	NA	9	19	22	5	1	7	0.560113	1.47168	1.5947	0.357583	0.0688364	0.47294
FBgn0013325	14097.1	21077.4	18912.7	10621.9	16391.2	19037.3	0.19717	0.4805	0.99972	RpL11	2R	+	19442342	19443825	1017	protein_coding	NA	18196	16792	19261	13774	14214	16552	1081.31	1241.95	1333.13	940.604	934.274	1067.82
FBgn0013334	877	810.863	808.119	909.962	1054	951.177	-0.20665	0.31456	0.99972	Sap47	3R	+	15935100	15962124	6401	protein_coding	NA	1132	646	823	1180	914	827	11.5365	8.19387	9.76901	13.8193	10.3029	9.14975
FBgn0013342	69.7261	85.354	72.662	47.0404	169.517	127.667	-0.41545	0.24526	0.99972	nSyb	3L	-	1630348	1637752	4072	protein_coding	NA	90	68	74	61	147	111	1.98579	1.86736	1.90171	1.54666	3.58751	2.65882
FBgn0013343	433.852	514.634	332.871	499.708	516.622	452.01	-0.17477	0.48471	0.99972	Syx1A	3R	-	24101600	24105763	2832	protein_coding	NA	560	410	339	648	448	393	11.446	10.4299	8.07029	15.22	10.1282	8.72036
FBgn0013347	460.967	419.239	472.303	548.291	523.541	534.821	-0.22876	0.27367	0.99972	TfIIA-S	3R	-	23890388	23891060	617	protein_coding	NA	595	334	481	711	454	465	49.5129	34.592	46.6196	67.99	41.7871	42.0078
FBgn0013348	0.774735	1.25521	3.92768	7.71154	10.3786	8.05107	-0.70446	0.059433	0.96159	TpnC41C	2R	-	5065237	5070210	1880	protein_coding	NA	1	1	4	10	9	7	0.0380042	0.0472998	0.177057	0.436722	0.37832	0.288805
FBgn0013432	217.701	223.427	242.534	276.844	357.484	292.139	-0.39209	0.099659	0.99972	bcn92	X	-	2148463	2149647	748	protein_coding	NA	281	178	247	359	310	254	19.2882	15.2066	19.7471	28.3174	23.536	18.9275
FBgn0013435	99.9408	101.672	109.975	101.021	77.2627	96.6129	0.15271	0.57434	0.99972	cdc2rk	2R	-	10067217	10068702	1251	protein_coding	NA	129	81	112	131	67	84	5.29443	4.13754	5.35389	6.17838	3.04151	3.74269
FBgn0013467	6.19788	3.76562	0	1.54231	5.76588	5.75077	-0.082934	0.80219	0.99972	igl	2R	+	15155437	15190292	2894	protein_coding	NA	8	3	0	2	5	5	0.172511	0.080515	0	0.04956	0.119257	0.11705
FBgn0013469	199.107	192.046	191.474	118.758	192.58	258.785	0.028702	0.92448	0.99972	klu	3L	-	10981171	11009188	4792	protein_coding	NA	257	153	195	154	167	225	3.11064	2.30481	2.74899	2.14196	2.23572	2.95647
FBgn0013531	117.76	96.6508	91.3185	185.077	91.1008	75.9101	-0.1578	0.63819	0.99972	MED20	2L	-	8071812	8072848	1037	protein_coding	NA	152	77	93	240	79	66	7.52578	4.7449	5.36307	13.655	4.32634	3.54754
FBgn0013548	785.581	370.286	676.542	1487.56	216.797	531.371	-0.17485	0.64677	0.99972	l(2)dtl	2R	+	23702477	23705403	2653	protein_coding	NA	1014	295	689	1929	188	462	19.624	7.10558	15.5307	42.8998	4.02432	9.70658
FBgn0013563	260.311	251.041	228.787	352.418	252.545	290.989	-0.24656	0.31585	0.99972	Pex1	3L	+	14071892	14076123	3275	protein_coding	NA	336	200	233	457	219	253	5.26763	3.90242	4.25455	8.23314	3.79756	4.30597
FBgn0013576	4726.66	4919.15	4207.52	5523.01	5793.55	6073.96	-0.30533	0.12402	0.99972	mtd	3R	-	5270116	5350443	13830	protein_coding	NA	6101	3919	4285	7162	5024	5281	67.8466	54.2413	55.5009	91.524	61.7962	63.7555
FBgn0013672	113429	207442	153740	103907	287084	293243	-0.39537	0.24325	0.99972	mt:ATPase6	dmel_mitochondrion_genome	+	4062	4736	675	protein_coding	NA	146410	165265	156571	134742	248951	254960	11136.6	15645.6	13871.3	11777.7	20945.1	21053.8
FBgn0013673	3.09894	12.5521	4.9096	1.54231	5.76588	19.5526	-0.12603	0.73067	0.99972	mt:ATPase8	dmel_mitochondrion_genome	+	3907	4068	162	protein_coding	NA	4	10	5	2	5	17	1.26774	3.94457	1.84571	0.72841	1.75278	5.84919
FBgn0013674	692095	1.29844e+06	943345	790706	2.37656e+06	1.77477e+06	-0.56433	0.09531	0.99972	mt:CoI	dmel_mitochondrion_genome	+	1474	3009	1536	protein_coding	NA	893331	1034443	960716	1025354	2060885	1543075	29861.3	43035.8	37403.5	39386.1	76196.4	55996.1
FBgn0013675	175264	322361	255865	206990	613731	460137	-0.5773	0.086197	0.99972	mt:CoII	dmel_mitochondrion_genome	+	3083	3767	685	protein_coding	NA	226225	256819	260576	268416	532210	400066	16956.5	23958	22748.5	23119.5	44122.9	32553.9
FBgn0013676	422836	725186	566194	504046	1.4079e+06	1.11405e+06	-0.62997	0.056005	0.94468	mt:CoIII	dmel_mitochondrion_genome	+	4736	5524	789	protein_coding	NA	545782	577743	576620	653625	1220894	968608	35516.4	46792.1	43704.1	48877.9	87876.5	68427.8
FBgn0013678	14207.9	26329.2	26074.9	15900.4	35275.6	37140.8	-0.31465	0.33637	0.99972	mt:Cyt-b	dmel_mitochondrion_genome	+	10498	11634	1137	protein_coding	NA	18339	20976	26555	20619	30590	32292	828.137	1178.9	1396.67	1069.96	1527.89	1583.06
FBgn0013679	3958.12	10708.2	10444.7	5435.1	13000.9	17256.9	-0.3522	0.32804	0.99972	mt:ND1	dmel_mitochondrion_genome	-	11720	12658	939	protein_coding	NA	5109	8531	10637	7048	11274	15004	279.355	580.563	677.427	442.854	681.843	890.642
FBgn0013680	11961.9	22547.3	21197.7	18808.5	39240.2	24772	-0.45536	0.14833	0.99972	mt:ND2	dmel_mitochondrion_genome	+	240	1265	1026	protein_coding	NA	15440	17963	21588	24390	34028	21538	772.657	1118.78	1258.27	1402.57	1883.48	1170.09
FBgn0013681	1220.21	3697.83	2945.76	1607.09	3224.28	5142.34	-0.23613	0.51421	0.99972	mt:ND3	dmel_mitochondrion_genome	+	5608	5961	354	protein_coding	NA	1575	2946	3000	2084	2796	4471	228.436	531.795	506.789	347.34	448.545	703.984
FBgn0013683	14.72	26.3593	33.3853	9.25385	62.2715	34.5046	-0.26544	0.4964	0.99972	mt:ND4L	dmel_mitochondrion_genome	-	9544	9834	291	protein_coding	NA	19	21	34	12	54	30	3.35234	4.61149	6.98707	2.43304	10.5384	5.74632
FBgn0013684	3570.75	8723.68	7794.47	4858.27	11425.7	10351.4	-0.30294	0.37428	0.99972	mt:ND5	dmel_mitochondrion_genome	-	6402	8124	1723	protein_coding	NA	4609	6950	7938	6300	9908	9000	137.344	257.759	275.508	215.733	326.567	291.151
FBgn0013685	7.74735	50.2082	25.5299	13.1096	29.9826	32.2043	0.072841	0.85209	0.99972	mt:ND6	dmel_mitochondrion_genome	+	9970	10494	525	protein_coding	NA	10	40	26	17	26	28	0.977975	4.86873	2.96158	1.91051	2.81246	2.97276
FBgn0013686	144662	272033	229113	186128	386318	317388	-0.37142	0.23202	0.99972	mt:lrRNA	dmel_mitochondrion_genome	-	12734	14058	1325	rRNA	NA	186725	216724	233332	241363	335004	275953	7235.58	10452.2	10530.9	10747.7	14358.4	11608.6
FBgn0013688	61.9788	100.416	148.27	78.6577	209.878	201.277	-0.45898	0.19975	0.99972	mt:srRNA	dmel_mitochondrion_genome	-	14131	14916	786	rRNA	NA	80	80	151	102	182	175	5.22582	6.50403	11.4885	7.65664	13.1498	12.4102
FBgn0013697	5.42314	0	1.96384	6.94039	2.30635	0	-0.049675	0.86082	0.99972	mt:tRNA:K	dmel_mitochondrion_genome	+	3768	3838	71	tRNA	NA	7	0	2	9	2	0	5.06205	0	1.68454	7.47902	1.59972	0
FBgn0013699	12.3958	23.8489	12.7649	3.08462	95.7135	72.4597	-0.72147	0.060782	0.96788	mt:tRNA:L:UUR	dmel_mitochondrion_genome	+	3012	3077	66	tRNA	NA	16	19	13	4	83	63	12.4469	18.396	11.779	3.57583	71.4177	53.2057
FBgn0013709	2.3242	0	1.96384	0	0	3.45046	0.03126	0.88535	NA	mt:tRNA:W	dmel_mitochondrion_genome	+	1264	1329	66	tRNA	NA	3	0	2	0	0	3	2.3338	0	1.81215	0	0	2.53361
FBgn0013710	29.4399	32.6353	24.548	43.1846	125.696	89.712	-1.0975	0.0021666	0.13514	mt:tRNA:Y	dmel_mitochondrion_genome	-	1403	1468	66	tRNA	NA	38	26	25	56	109	78	29.5615	25.1735	22.6519	50.0616	93.7895	65.8737
FBgn0013717	452.445	400.41	466.412	613.068	332.114	408.304	-0.032693	0.90649	0.99972	not	3L	-	18618305	18622129	2989	protein_coding	NA	584	319	475	795	288	355	10.9473	7.44241	10.3708	17.1252	5.97135	7.22434
FBgn0013718	2542.68	3760.6	2442.03	2861.75	4847.95	3603.43	-0.31516	0.26093	0.99972	nuf	3L	+	14190870	14233250	5594	protein_coding	NA	3282	2996	2487	3711	4204	3133	55.835	63.4362	49.2794	72.5492	79.1071	57.8633
FBgn0013720	271.932	341.416	334.834	544.435	403.611	400.253	-0.45157	0.071068	0.99972	pck	X	+	1470666	1472325	1478	protein_coding	NA	351	272	341	706	350	348	13.3592	12.8846	15.1165	30.8783	14.7342	14.379
FBgn0013725	2.3242	0	0	13.1096	0	0	-0.17154	0.42389	0.99972	phyl	2R	-	14427336	14432337	1839	protein_coding	NA	3	0	0	17	0	0	0.083758	0	0	0.545416	0	0
FBgn0013726	1908.95	1863.98	1839.13	2813.17	2033.05	1933.41	-0.24548	0.2973	0.99972	pnut	2R	+	8237271	8240297	3027	protein_coding	NA	2464	1485	1873	3648	1763	1681	46.2393	34.6837	40.9384	78.6682	36.5938	34.2463
FBgn0013732	678.668	335.14	633.338	1303.25	237.554	454.311	-0.17537	0.64161	0.99972	sced	2R	+	6657326	6660624	3299	protein_coding	NA	876	267	645	1690	206	395	14.2784	5.41646	12.245	31.6546	3.71389	6.98953
FBgn0013733	5637.75	7036.68	6168.42	4987.83	10643.8	8478.93	-0.29749	0.30333	0.99972	shot	2R	-	13864237	13942110	30414	protein_coding	NA	7277	5606	6282	6468	9230	7372	20.8068	19.9496	20.9206	21.2519	29.1904	22.883
FBgn0013746	850.659	784.503	825.794	1061.88	744.951	798.207	-0.074445	0.75198	0.99972	alien	2L	-	8993818	8997379	3235	protein_coding	NA	1098	625	841	1377	646	694	26.2945	18.6282	23.4574	37.8939	17.1112	18.0425
FBgn0013749	1120.27	1295.37	1234.27	1171.38	1138.18	1238.72	0.037475	0.85297	0.99972	Arf102F	4	+	1124167	1125325	930	protein_coding	NA	1446	1032	1257	1519	987	1077	90.1007	80.0327	91.2257	108.766	68.0239	72.8535
FBgn0013750	1432.48	1513.78	1339.34	1401.19	1413.79	1464.15	0.0019455	0.99211	0.99972	Arf51F	2R	+	15322501	15325490	2196	protein_coding	NA	1849	1206	1364	1817	1226	1273	64.6692	52.4972	55.5645	73.028	47.4282	48.3353
FBgn0013751	8.52208	2.51041	15.7107	16.1942	34.5953	2.30031	-0.35263	0.3487	0.99972	Awh	3L	+	3846206	3861692	2104	protein_coding	NA	11	2	16	21	30	2	0.270878	0.0612969	0.458905	0.594256	0.817122	0.053467
FBgn0013753	208.404	202.088	244.498	378.637	169.517	238.082	-0.21544	0.48328	0.99972	Bgb	3L	+	1639711	1640952	1242	protein_coding	NA	269	161	249	491	147	207	11.1203	8.2836	11.9891	23.3249	6.72152	9.28989
FBgn0013755	0	2.51041	0	64.777	0	0	-0.11577	NA	NA	Bro	3L	+	1647869	1648612	744	protein_coding	NA	0	2	0	84	0	0	0	0.17178	0	6.66142	0	0
FBgn0013756	2943.99	1517.54	2515.68	4546.73	1080.52	1840.25	-0.067067	0.85366	0.99972	Mtor	2R	+	11852617	11861202	7780	protein_coding	NA	3800	1209	2562	5896	937	1600	25.6516	10.1575	20.1434	45.7364	6.99609	11.7253
FBgn0013759	1200.06	945.17	1035.92	1250.81	1057.46	967.279	-0.038162	0.86762	0.99972	CASK	3R	-	21783400	21822674	8504	protein_coding	NA	1549	753	1055	1622	917	841	18.8151	11.3835	14.9255	22.6401	12.32	11.0898
FBgn0013762	296.723	380.327	351.527	363.214	390.926	341.596	-0.08393	0.71623	0.99972	Cdk5	2R	-	15569528	15571417	1604	protein_coding	NA	383	303	358	471	339	297	12.2597	12.0713	13.3471	17.3252	12.0024	10.3208
FBgn0013763	14008	20128.5	14937	7810.25	15797.3	18004.5	0.19231	0.5321	0.99972	CG5210	2R	+	16691022	16693751	1811	protein_coding	NA	18081	16036	15212	10128	13699	15654	553.905	611.416	542.777	356.542	464.18	520.611
FBgn0013764	729.8	741.826	846.414	1168.3	1320.39	1566.51	-0.73189	0.0012269	0.086576	Chi	2R	-	24031538	24033943	2246	protein_coding	NA	942	591	862	1515	1145	1362	22.5903	17.6395	24.0768	41.75	30.3711	35.4586
FBgn0013765	955.248	684.087	859.179	1622.51	606.57	838.462	-0.231	0.47632	0.99972	cnn	2R	-	13439314	13450475	6196	protein_coding	NA	1233	545	875	2104	526	729	17.4255	9.58619	14.403	34.1697	8.22228	11.1847
FBgn0013767	0.774735	1.25521	0	0	5.76588	1.15015	-0.17725	0.46943	0.99972	Crz	3R	+	14314854	14315716	654	protein_coding	NA	1	1	0	0	5	1	0.0785071	0.0977096	0	0	0.434174	0.0852283
FBgn0013770	21467.9	31586	23443.3	15862.6	31862.2	30429.6	-0.025507	0.93155	0.99972	Cp1	2R	+	13960675	13967981	2066	protein_coding	NA	27710	25164	23875	20570	27630	26457	948.489	1072.02	951.834	809.103	1046.07	983.13
FBgn0013771	495.056	692.873	531.218	397.144	1009.03	835.011	-0.30179	0.34341	0.99972	Cyp6a9	2R	-	14879356	14881372	1964	protein_coding	NA	639	552	541	515	875	726	16.705	17.9603	16.4727	15.4713	25.301	20.6043
FBgn0013772	881.648	1065.67	786.517	117.987	139.534	212.778	2.149	2.3449e-14	1.4708e-11	Cyp6a8	2R	-	14887171	14889010	1781	protein_coding	NA	1138	849	801	153	121	185	32.8069	30.462	26.8954	5.0686	3.85828	5.78988
FBgn0013773	846.011	981.571	924.968	1100.44	815.295	1143.25	-0.13761	0.55798	0.99972	Cyp6a22	2R	+	14871366	14873705	2165	protein_coding	NA	1092	782	942	1427	707	994	30.1113	26.8375	30.2538	45.2173	21.5631	29.7556
FBgn0013799	818.12	597.478	764.915	1169.84	497.018	532.521	-0.010401	0.97418	0.99972	Deaf1	3L	+	19818174	19830686	3698	protein_coding	NA	1056	476	779	1517	431	463	21.6789	12.1621	18.6266	35.7876	9.78668	10.3188
FBgn0013809	6.19788	11.2968	14.7288	2.31346	12.6849	5.75077	0.27072	0.4825	0.99972	Dhc16F	X	+	18064483	18078472	12442	protein_coding	NA	8	9	15	3	11	5	0.0330131	0.046224	0.0720958	0.0142263	0.0502082	0.0223997
FBgn0013810	15.4947	33.8905	25.5299	44.727	8.07223	21.8529	-0.010613	0.97827	0.99972	Dhc36C	2L	+	17501401	17525515	12202	protein_coding	NA	20	27	26	58	7	19	0.0841561	0.141399	0.127424	0.280451	0.0325791	0.0867929
FBgn0013811	60.4293	70.2915	70.6982	34.7019	84.1818	63.2584	0.1145	0.73468	0.99972	Dhc62B	3L	-	1759172	1771758	12090	protein_coding	NA	78	56	72	45	73	55	0.331249	0.29599	0.356135	0.219607	0.342901	0.25357
FBgn0013812	34.0883	36.401	17.6745	18.5077	14.9913	27.6037	0.34536	0.3536	0.99972	Dhc93AB	3R	-	21024580	21042499	14010	protein_coding	NA	44	29	18	24	13	24	0.161423	0.132416	0.0769146	0.101181	0.0527524	0.0955873
FBgn0013813	1.54947	10.0416	7.85535	3.08462	2.30635	0	0.42345	0.21193	0.99972	Dhc98D	3R	+	28486953	28519398	15919	protein_coding	NA	2	8	8	4	2	0	0.00681719	0.0339386	0.0317605	0.0156678	0.00754033	0
FBgn0013949	3932.55	6942.54	4586.54	2807	6268.66	8841.23	-0.1586	0.64114	0.99972	Ela	3R	+	24865350	24867651	2135	protein_coding	NA	5076	5531	4671	3640	5436	7687	175.739	238.329	188.355	144.817	208.166	288.92
FBgn0013953	577.177	402.921	542.019	600.729	1541.79	871.816	-0.77344	0.015853	0.48769	Esp	3R	+	24841935	24850412	2907	protein_coding	NA	745	321	552	779	1337	758	14.9886	8.03784	12.935	18.0102	29.7524	16.5558
FBgn0013954	4841.32	6209.5	4921.38	4815.86	5129.32	6391.4	-0.029369	0.89973	0.99972	FK506-bp2	2R	+	19290109	19290962	633	protein_coding	NA	6249	4947	5012	6245	4448	5557	506.867	499.405	473.496	582.089	399.055	489.326
FBgn0013972	57.3304	94.1404	82.4812	40.1	79.5691	63.2584	0.27259	0.41185	0.99972	Gycalpha99B	3R	+	29682503	29685758	2354	protein_coding	NA	74	75	84	52	69	55	1.61403	2.03596	2.13394	1.30334	1.66462	1.30232
FBgn0013973	17.8189	36.401	24.548	28.5327	59.9651	21.8529	-0.31177	0.40802	0.99972	Gycbeta100B	3R	+	31134392	31178278	4066	protein_coding	NA	23	29	25	37	52	19	0.290434	0.45577	0.36769	0.536902	0.726286	0.260464
FBgn0013981	3369.32	5402.4	4643.5	3053.77	4978.26	5290.71	0.0084237	0.97639	0.99972	His4r	3R	+	14625755	14626614	796	protein_coding	NA	4349	4304	4729	3960	4317	4600	353.313	435.181	447.467	369.691	387.915	405.698
FBgn0013983	330.812	475.723	372.147	215.152	471.649	558.975	-0.061638	0.84906	0.99972	imd	2R	-	18409796	18413599	1518	protein_coding	NA	427	379	379	279	409	486	15.4501	17.0676	15.9722	11.6007	16.3686	19.0904
FBgn0013984	702.685	692.873	618.609	611.525	766.861	534.821	0.066791	0.77848	0.99972	InR	3R	-	21570248	21619321	11367	protein_coding	NA	907	552	630	793	665	465	4.49245	3.40285	3.63445	4.5136	3.64319	2.50037
FBgn0013987	1527.78	1925.48	1729.16	1657.21	1961.55	1641.27	-0.019817	0.92786	0.99972	MAPk-Ak2	X	-	5759908	5764203	2198	protein_coding	NA	1972	1534	1761	2149	1701	1427	50.373	48.769	52.3929	63.0814	48.0596	39.5721
FBgn0013995	868.478	419.239	625.482	1094.27	695.365	575.077	-0.24251	0.44296	0.99972	Calx	3R	+	20978183	21015613	8959	protein_coding	NA	1121	334	637	1419	603	500	11.2327	4.16536	7.43429	16.3393	6.68313	5.43904
FBgn0013997	550.062	682.832	562.64	523.614	840.665	550.924	-0.080526	0.76219	0.99972	Nrx-IV	3L	+	12146519	12156990	5137	protein_coding	NA	710	544	573	679	729	479	7.37935	7.03699	6.93644	8.10968	8.38055	5.40468
FBgn0014000	2444.29	4030.46	3280.59	1146.71	2768.77	3520.62	0.29577	0.37902	0.99972	Hf	2L	-	19966727	19967685	896	protein_coding	NA	3155	3211	3341	1487	2401	3061	180.792	229.006	222.986	97.9182	152.179	190.422
FBgn0014002	11513.3	16345.3	11996.1	8407.12	14230.2	14475.8	0.087476	0.75359	0.99972	Pdi	3L	-	15137738	15142840	2328	protein_coding	NA	14861	13022	12217	10902	12340	12586	346.197	377.556	331.484	291.847	317.962	318.301
FBgn0014006	1019.55	961.487	931.841	1253.9	968.667	1013.29	-0.13904	0.52702	0.99972	Pk92B	3R	+	19879719	19886030	5168	protein_coding	NA	1316	766	949	1626	840	881	13.8403	10.0264	11.6246	19.6509	9.77132	10.0587
FBgn0014007	1114.84	722.998	934.787	1522.26	618.102	843.063	-0.083661	0.79327	0.99972	Ptp69D	3L	+	12734945	12741568	5168	protein_coding	NA	1439	576	952	1974	536	733	14.2991	7.12359	11.0181	22.5408	5.89112	7.90728
FBgn0014009	1660.26	2484.05	1742.91	1458.25	2540.44	2303.76	-0.083138	0.76847	0.99972	Rab2	2R	+	6696739	6699469	1712	protein_coding	NA	2143	1979	1775	1891	2203	2003	78.5925	90.3301	75.8192	79.6937	89.3631	79.747
FBgn0014010	3423.55	4388.2	3461.26	3012.13	4695.73	4096.85	-0.058585	0.81647	0.99972	Rab5	2L	-	2359142	2365273	3146	protein_coding	NA	4419	3496	3525	3906	4072	3562	119.415	117.58	110.947	121.294	121.71	104.497
FBgn0014011	1121.04	1979.46	1163.57	1165.99	2313.27	1558.46	-0.19356	0.53265	0.99972	Rac2	3L	-	7432762	7435190	2429	protein_coding	NA	1447	1577	1185	1512	2006	1355	39.8574	54.0631	38.0173	47.8593	61.1163	40.5187
FBgn0014018	9400.63	20743.5	11055.4	7465.54	22413.1	14625.4	-0.080973	0.81605	0.99972	Rel	3R	-	9044183	9047977	3499	protein_coding	NA	12134	16526	11259	9681	19436	12716	197.528	334.827	213.475	181.1	349.959	224.725
FBgn0014019	13.1705	11.2968	3.92768	5.39808	4.6127	9.20123	0.24838	0.52152	0.99972	Rh5	2L	+	12008153	12009832	1572	protein_coding	NA	17	9	4	7	4	8	0.597837	0.393917	0.163839	0.282882	0.155589	0.305421
FBgn0014020	4816.53	6527.07	5321.02	4171.94	7749.34	7116	-0.163	0.56036	0.99972	Rho1	2R	+	16102687	16107229	2385	protein_coding	NA	6217	5200	5419	5410	6720	6187	185.368	192.968	188.189	185.364	221.62	200.267
FBgn0014022	278.13	146.859	221.914	333.139	174.129	175.973	-0.06171	0.84918	0.99972	Rlb1	3R	+	9513327	9514827	1444	protein_coding	NA	359	117	226	432	151	153	12.7648	5.17766	9.35945	17.6513	5.93857	5.9059
FBgn0014023	294.399	277.4	295.558	308.462	230.635	269.136	0.090076	0.70423	0.99972	mRpL47	3R	-	9514822	9515908	905	protein_coding	NA	380	221	301	400	200	234	21.5587	15.6048	19.8896	26.0779	12.5503	14.4122
FBgn0014024	533.792	540.993	494.887	582.993	394.386	455.461	0.11586	0.63339	0.99972	Rnp4F	X	-	5318928	5322696	3323	protein_coding	NA	689	431	504	756	342	396	11.0308	8.58802	9.39811	13.9086	6.05618	6.88269
FBgn0014026	25894.7	38022.7	33199.7	20386.2	30233.9	33613.2	0.17728	0.50905	0.99972	RpL7A	X	-	6530897	6533348	1315	protein_coding	NA	33424	30292	33811	26436	26218	29225	1608.35	1814.17	1894.97	1461.81	1395.43	1526.69
FBgn0014028	1317.05	1680.72	1385.49	1352.6	1777.04	1782.74	-0.14794	0.52862	0.99972	SdhB	2R	+	6807626	6809172	1219	protein_coding	NA	1700	1339	1411	1754	1541	1550	71.6031	70.1927	69.2201	84.8959	71.7911	70.8744
FBgn0014029	566.331	617.561	521.399	741.85	630.787	647.536	-0.2249	0.3009	0.99972	2019-09-02	3R	-	20586129	20588356	1688	protein_coding	NA	731	492	531	962	547	563	23.0968	19.3476	19.5412	34.9287	19.1164	19.3115
FBgn0014031	7296.45	11355.8	9683.69	3070.74	5621.73	8427.17	0.56787	0.078886	0.99972	Spat	X	+	6528948	6530726	1410	protein_coding	NA	9418	9047	9862	3982	4875	7327	342.947	410.016	418.268	166.626	196.348	289.647
FBgn0014032	419.906	466.936	425.171	462.693	355.178	324.343	0.17611	0.46823	0.99972	Sptr	X	-	8463296	8464438	1143	protein_coding	NA	542	372	433	600	308	282	24.3467	20.7975	22.6543	30.9717	15.303	13.752
FBgn0014033	1427.84	3937.58	2011.95	1364.17	4710.72	2662.61	-0.16724	0.64514	0.99972	Sr-CI	2L	+	4121702	4124153	2202	protein_coding	NA	1843	3137	2049	1769	4085	2315	44.4464	94.1572	57.554	49.0245	108.965	60.609
FBgn0014037	2885.89	2466.48	2729.74	3569.67	2415.9	2204.84	-0.017079	0.94664	0.99972	Su(Tpl)	3L	-	19889120	19909410	6626	protein_coding	NA	3725	1965	2780	4629	2095	1917	32.8166	21.5456	28.5256	46.8628	20.4144	18.3343
FBgn0014073	241.717	364.01	291.63	181.221	631.94	369.199	-0.29053	0.40171	0.99972	Tie	3L	-	4510698	4532145	5236	protein_coding	NA	312	290	297	235	548	321	3.05944	3.53927	3.39208	2.64807	5.94364	3.41717
FBgn0014075	1552.57	1419.64	1375.67	2022.74	1211.99	1376.73	-0.074749	0.77234	0.99972	Ugt	3L	+	18872747	18878245	5316	protein_coding	NA	2004	1131	1401	2623	1051	1197	19.3553	13.5954	15.7602	29.1121	11.2277	12.5508
FBgn0014076	852.208	1110.86	306.359	572.196	355.178	111.565	0.68634	0.071656	0.99972	Vm32E	2L	-	11171167	11171665	499	protein_coding	NA	1100	885	312	742	308	97	120.68	120.84	39.8674	93.5446	37.3746	11.5528
FBgn0014092	161.92	175.729	188.528	253.71	190.274	219.679	-0.2991	0.23005	0.99972	CG4278	2L	+	16327069	16328131	1063	protein_coding	NA	209	140	192	329	165	191	10.0949	8.41608	10.8013	18.2609	8.815	10.0152
FBgn0014127	505.902	350.202	454.629	880.658	191.427	409.455	-0.12247	0.73503	0.99972	barr	2L	-	20058163	20061370	2908	protein_coding	NA	653	279	463	1142	166	356	12.3082	6.54503	10.1644	24.7354	3.46077	7.28458
FBgn0014133	4223.85	2533	3722.46	6496.98	2358.24	3275.64	-0.16137	0.62686	0.99972	bif	X	+	11678970	11694740	8842	protein_coding	NA	5452	2018	3791	8425	2045	2848	44.9463	20.7056	36.4011	79.8145	18.6473	25.489
FBgn0014135	106.139	81.5883	77.5716	47.8116	163.751	54.0572	0.0028946	0.99371	0.99972	bnl	3R	-	19794073	19836817	4559	protein_coding	NA	137	65	79	62	142	47	1.75852	1.03841	1.18107	0.914518	2.01604	0.654937
FBgn0014141	1774.14	1639.3	1434.58	1834.58	2490.86	2136.99	-0.37502	0.10149	0.99972	cher	3R	-	17091533	17125389	9428	protein_coding	NA	2290	1306	1461	2379	2160	1858	19.0779	13.5415	14.1764	22.7752	19.9037	16.8041
FBgn0014143	1.54947	2.51041	0	0	5.76588	2.30031	-0.12709	0.63295	0.99972	croc	3L	-	21474133	21476479	2347	protein_coding	NA	2	2	0	0	5	2	0.0437526	0.0544542	0	0	0.120984	0.0474984
FBgn0014163	2712.35	3995.32	2898.63	3945.23	5205.43	3765.6	-0.37533	0.14186	0.99972	fax	3L	-	16402796	16411828	4167	protein_coding	NA	3501	3183	2952	5116	4514	3274	53.594	60.6441	52.6335	89.997	76.4311	54.4098
FBgn0014184	8712.67	11443.7	10345.5	8107.15	12599.6	10333	-0.022298	0.92883	0.99972	Oda	2R	-	12166295	12174264	2445	protein_coding	NA	11246	9117	10536	10513	10926	8984	338.657	341.698	369.539	363.8	363.922	293.702
FBgn0014189	2387.73	1813.77	2204.41	3159.42	1461.07	1905.8	-0.022372	0.93993	0.99972	Hel25E	2L	-	5539326	5542314	2460	protein_coding	NA	3082	1445	2245	4097	1267	1657	86.898	50.7076	73.7251	132.745	39.5129	50.7194
FBgn0014269	467.94	377.817	474.267	685.556	330.961	531.371	-0.19168	0.51214	0.99972	prod	2R	-	18969404	18971133	1597	protein_coding	NA	604	301	483	889	287	462	19.4186	12.0442	18.0864	32.8441	10.2058	16.125
FBgn0014340	249.465	253.551	289.666	553.689	152.219	284.088	-0.2357	0.49723	0.99972	mof	X	-	5873840	5876853	3014	protein_coding	NA	322	202	295	718	132	247	5.48529	4.28275	5.85312	14.0554	2.48715	4.56789
FBgn0014342	72.8251	66.5259	74.6259	103.335	54.1992	70.1594	-0.076473	0.8084	0.99972	mia	3R	-	5548115	5551168	2590	protein_coding	NA	94	53	76	134	47	61	2.33042	1.63535	2.19453	3.81756	1.28881	1.64177
FBgn0014343	92.9682	81.5883	80.5174	43.1846	76.1096	43.7058	0.51726	0.10307	0.99972	mirr	3L	+	12693639	12710249	3892	protein_coding	NA	120	65	82	56	66	38	1.71098	1.15347	1.36176	0.917541	1.04086	0.588196
FBgn0014366	458.643	292.463	429.099	611.525	252.545	427.857	-0.10328	0.74625	0.99972	noi	3R	-	5589601	5591459	1859	protein_coding	NA	592	233	437	793	219	372	16.3504	8.00924	14.0576	25.1683	6.69016	11.1539
FBgn0014380	533.792	1211.27	679.488	422.593	1529.11	924.723	-0.172	0.63193	0.99972	RhoL	3R	-	9497101	9502581	1412	protein_coding	NA	689	965	692	548	1326	804	31.5011	54.9114	36.8498	28.7913	67.0557	39.906
FBgn0014388	1044.34	1699.55	1069.31	704.064	2287.9	1610.21	-0.20119	0.55644	0.99972	sty	3L	-	3401153	3424935	5438	protein_coding	NA	1348	1354	1089	913	1984	1400	18.3487	22.9383	17.2649	14.281	29.8705	20.688
FBgn0014391	2237.43	2677.35	2134.69	1710.42	2391.68	2323.31	0.11995	0.61518	0.99972	sun	X	-	15847859	15849258	450	protein_coding	NA	2888	2133	2174	2218	2074	2020	348.895	320.713	305.9	307.917	277.135	264.926
FBgn0014395	18.5936	22.5937	17.6745	8.4827	14.9913	5.75077	0.584	0.13005	0.99972	tilB	X	+	22449737	22451463	1358	protein_coding	NA	24	18	18	11	13	5	0.907399	0.847008	0.79265	0.477918	0.543645	0.205226
FBgn0014396	2563.6	3116.67	2172.01	1410.44	3557.54	3649.44	-0.10465	0.74608	0.99972	tim	2L	-	3493986	3508119	6181	protein_coding	NA	3309	2483	2212	1829	3085	3173	35.685	33.3268	27.7841	22.6661	36.7984	37.1478
FBgn0014411	1478.97	1305.41	1291.22	1692.68	1396.49	1451.49	-0.14351	0.49881	0.99972	Vps26	X	+	1873853	1876474	2543	protein_coding	NA	1909	1040	1315	2195	1211	1262	38.5431	26.1338	30.9235	50.9271	27.0439	27.6614
FBgn0014417	638.382	748.102	760.005	759.587	559.29	808.558	0.010768	0.96462	0.99972	CG13397	2L	-	8408888	8411868	2902	protein_coding	NA	824	596	774	985	485	703	15.7159	14.1477	17.1939	21.5885	10.2315	14.556
FBgn0014427	4132.44	7294	6020.15	2981.28	5372.64	6950.38	0.15015	0.63465	0.99972	CG11899	3R	+	29200454	29201770	1176	protein_coding	NA	5334	5811	6131	3866	4659	6043	232.88	315.761	311.769	193.961	224.987	286.422
FBgn0014454	0	1.25521	0	0	6.91905	3.45046	-0.26703	0.27622	0.99972	Acp1	2L	-	7740562	7741537	858	protein_coding	NA	0	1	0	0	6	3	0	0.0744779	0	0	0.397133	0.194893
FBgn0014455	4299	6391.51	5327.89	3534.97	3844.69	4926.11	0.33566	0.18237	0.99972	Ahcy13	X	+	15450261	15453167	2119	protein_coding	NA	5549	5092	5426	4584	3334	4283	166.807	190.509	189.977	158.35	110.854	139.773
FBgn0014464	78.2482	40.1666	74.6259	90.2251	38.0548	8.05107	0.2593	0.50661	0.99972	Cp7Fa	X	+	8470888	8473087	1033	protein_coding	NA	101	32	76	117	33	7	5.02005	1.97954	4.39969	6.68261	1.8142	0.377711
FBgn0014465	705.009	21.3385	366.256	585.306	55.3524	233.481	0.081293	0.81094	0.99972	Cp7Fb	X	+	8473837	8476071	2093	protein_coding	NA	910	17	373	759	48	203	32.5821	0.757556	15.555	31.2287	1.90092	7.89057
FBgn0014466	550.062	11.2968	200.312	418.737	26.523	70.1594	0.11787	0.71151	0.99972	Cp7Fc	X	+	8477117	8478320	1132	protein_coding	NA	710	9	204	543	23	61	32.2032	0.508055	10.7769	28.3018	1.15386	3.00362
FBgn0014469	3614.91	4069.38	3650.78	1765.17	2811.44	3556.27	0.40743	0.1441	0.99972	Cyp4e2	2R	+	8444560	8447164	1897	protein_coding	NA	4666	3242	3718	2289	2438	3092	130.769	113.084	121.365	73.7193	75.5753	94.0753
FBgn0014857	1075.33	1186.17	1108.59	1419.7	1241.97	1442.29	-0.26365	0.19714	0.99972	His3.3A	2L	+	5055058	5056149	1002	protein_coding	NA	1388	945	1129	1841	1077	1254	83.9399	71.1277	79.5235	127.94	72.041	82.3288
FBgn0014859	6.19788	2.51041	3.92768	0	13.8381	8.05107	-0.18732	0.58046	0.99972	Hr38	2L	-	20683462	20714588	7704	protein_coding	NA	8	2	4	0	12	7	0.0557024	0.0173317	0.0324389	0	0.0924166	0.0529123
FBgn0014861	1125.69	539.738	882.745	2120.67	287.141	751.05	-0.1872	0.62446	0.99972	Mcm2	3R	+	8264970	8267924	2898	protein_coding	NA	1453	430	899	2750	249	653	25.7427	9.48167	18.5511	55.988	4.87947	12.5596
FBgn0014863	507.451	405.431	461.502	227.491	1668.64	572.776	-0.52223	0.16882	0.99972	Mlp84B	3R	-	7112850	7117732	3136	protein_coding	NA	655	323	470	295	1447	498	12.8506	7.88703	10.74	6.65088	31.4005	10.6069
FBgn0014865	275.806	2721.29	161.035	453.439	628.48	1307.72	0.11951	0.73817	0.99972	Mtk	2R	+	15408846	15409113	268	protein_coding	NA	356	2168	164	588	545	1137	68.2028	516.939	36.5947	129.45	115.487	236.476
FBgn0014868	1602.93	1928	1500.37	1625.59	1527.96	1735.58	0.037564	0.86235	0.99972	Ost48	X	-	9156929	9158515	1513	protein_coding	NA	2069	1536	1528	2108	1325	1509	70.2115	64.8735	60.3939	82.2039	49.7335	55.592
FBgn0014869	3291.85	4778.57	3825.56	3481.76	3551.78	4344.13	0.057387	0.81085	0.99972	Pglym78	3R	+	29148248	29149901	1136	protein_coding	NA	4249	3807	3896	4515	3080	3777	204.46	227.999	218.355	249.663	163.93	197.308
FBgn0014870	932.781	656.472	823.83	1270.09	537.38	659.038	-0.025611	0.93535	0.99972	Psi	2R	-	16861321	16867714	5690	protein_coding	NA	1204	523	839	1647	466	573	15.0189	8.11972	12.1898	23.6091	6.42958	7.75963
FBgn0014877	560.908	391.624	506.67	765.756	435.9	531.371	-0.21044	0.45433	0.99972	Roe1	2R	+	13554077	13555606	1065	protein_coding	NA	724	312	516	993	378	462	34.9041	18.7206	28.974	55.0124	20.1565	24.1799
FBgn0014879	1247.32	617.561	1095.82	2042.02	675.761	974.18	-0.23188	0.5051	0.99972	Set	3R	+	15263552	15265253	1169	protein_coding	NA	1610	492	1116	2648	586	847	70.7128	26.8946	57.0898	133.649	28.4679	40.386
FBgn0014906	1172.95	1117.13	1038.87	1247.73	1474.91	1051.24	-0.16377	0.47388	0.99972	Hydr2	2L	+	3163645	3169462	2857	protein_coding	NA	1514	890	1058	1618	1279	914	31.625	23.1378	25.7403	38.838	29.5502	20.7265
FBgn0014930	330.812	500.827	407.496	236.744	486.64	549.773	-0.030505	0.9231	0.99972	CG2846	3R	-	7912017	7913290	1210	protein_coding	NA	427	399	415	307	422	478	19.8585	23.095	22.4796	16.407	21.7078	24.1335
FBgn0014931	258.761	208.364	208.167	394.06	136.075	261.085	-0.17665	0.59311	0.99972	CG2678	3R	+	7913851	7916550	2003	protein_coding	NA	334	166	212	511	118	227	8.99255	5.56253	6.64805	15.81	3.51401	6.63494
FBgn0014949	0.774735	2.51041	0.981919	0	1.15318	1.15015	0.10662	0.67544	NA	btn	3R	-	22586149	22586625	477	protein_coding	NA	1	2	1	0	1	1	0.107639	0.267933	0.125369	0	0.119057	0.116854
FBgn0015000	492.731	605.009	459.538	671.675	577.741	418.656	-0.0878	0.73875	0.99972	betaggt-I	2L	+	4945579	4948324	1784	protein_coding	NA	636	482	468	871	501	364	18.7778	17.7118	16.0937	29.5515	16.361	11.6671
FBgn0015001	36.4125	21.3385	8.83727	23.1346	24.2167	21.8529	-0.02678	0.94446	0.99972	iotaTry	2R	+	11356720	11357537	818	protein_coding	NA	47	17	9	30	21	19	2.95006	1.32804	0.657958	2.16386	1.45793	1.29468
FBgn0015008	0	2.51041	0	0	0	0	0.066928	0.64315	NA	Actn3	3R	-	16975885	16977795	1856	protein_coding	NA	0	2	0	0	0	0	0	0.06886	0	0	0	0
FBgn0015010	244.816	61.5051	180.673	564.485	567.362	424.407	-1.1999	0.00063399	0.053416	Ag5r	X	-	14784664	14786551	1760	protein_coding	NA	316	49	184	732	492	369	11.5395	2.22703	7.82603	30.7175	19.8725	14.6286
FBgn0015011	82.1219	150.625	111.939	101.021	252.545	124.217	-0.34767	0.31246	0.99972	Ahcy89E	3R	-	16978439	16982158	1969	protein_coding	NA	106	120	114	131	219	108	2.90263	4.08973	3.63591	4.12222	6.63307	3.21058
FBgn0015019	2947.09	2059.79	2622.71	3852.69	2181.81	2393.47	-0.12181	0.66449	0.99972	Cctgamma	3R	+	16647605	16649978	2165	protein_coding	NA	3804	1641	2671	4996	1892	2081	93.5847	50.2459	76.5351	141.241	51.4838	55.5791
FBgn0015024	2761.93	2922.12	2815.16	2609.59	2896.78	3074.36	-0.012725	0.94886	0.99972	CkIalpha	X	+	12653626	12657834	3369	protein_coding	NA	3565	2328	2867	3384	2512	2673	81.0271	65.8539	75.8963	88.3842	63.1503	65.9545
FBgn0015025	72.8251	40.1666	66.7705	77.8866	27.6762	37.9551	0.2174	0.55058	0.99972	CkIIalpha-i1	3L	+	15816979	15818621	1585	protein_coding	NA	94	32	68	101	24	33	3.04499	1.29014	2.5656	3.7597	0.859912	1.1605
FBgn0015031	2368.36	3681.52	2635.47	2133.78	3279.63	3528.67	-0.035763	0.89786	0.99972	cype	2L	+	5327227	5327969	522	protein_coding	NA	3057	2933	2684	2767	2844	3068	375.497	448.385	383.986	390.565	386.389	409.111
FBgn0015033	263.41	523.421	312.25	272.989	620.408	449.71	-0.22302	0.49795	0.99972	Cyp4d8	3L	-	7493557	7496179	1573	protein_coding	NA	340	417	318	354	538	391	11.0978	16.9403	12.0895	13.2781	19.4234	13.8551
FBgn0015034	57.3304	38.9114	37.3129	15.4231	43.8207	25.3034	0.45284	0.2182	0.99972	Cyp4e1	2R	+	8447451	8449745	1772	protein_coding	NA	74	31	38	20	38	22	2.14415	1.11793	1.28242	0.665927	1.21784	0.692023
FBgn0015035	284.328	539.738	307.341	2353.56	2874.87	3265.29	-2.4256	6.2646e-17	4.7151e-14	Cyp4e3	2L	-	9747839	9750071	1805	protein_coding	NA	367	430	313	3052	2493	2839	10.4394	15.2232	10.3699	99.7627	78.4363	87.6698
FBgn0015036	10.8463	0	4.9096	2.31346	1.15318	3.45046	0.26681	0.41365	0.99972	Cyp4ae1	X	+	2179007	2180998	1822	protein_coding	NA	14	0	5	3	1	3	0.394518	0	0.164108	0.0971479	0.031169	0.0917771
FBgn0015037	588.024	851.029	594.061	397.916	915.621	684.341	0.020604	0.94702	0.99972	Cyp4p1	2R	+	9240041	9242139	1680	protein_coding	NA	759	678	605	516	794	595	23.1963	25.789	21.5355	18.1218	26.84	19.741
FBgn0015038	106.139	189.536	110.957	74.0308	114.164	139.169	0.2431	0.4544	0.99972	Cyp9b1	2R	-	7127838	7129808	1752	protein_coding	NA	137	151	113	96	99	121	4.01489	5.50754	3.85703	3.23294	3.20902	3.84958
FBgn0015039	1576.59	2017.11	1813.6	959.316	1886.59	2195.64	0.082892	0.78352	0.99972	Cyp9b2	2R	-	7130277	7132139	1667	protein_coding	NA	2035	1607	1847	1244	1636	1909	62.6781	61.602	66.2583	44.0297	55.7339	63.8311
FBgn0015075	354.054	311.291	284.757	515.902	296.366	368.049	-0.26916	0.32672	0.99972	Ddx1	3L	+	22263369	22266017	2470	protein_coding	NA	457	248	290	669	257	320	9.49962	6.41608	7.02118	15.9805	5.90892	7.22129
FBgn0015218	4289.71	3377.76	4100.49	5197.58	3324.6	3801.26	-0.05878	0.81552	0.99972	eIF-4E	3L	-	9399618	9402460	2235	protein_coding	NA	5537	2691	4176	6740	2883	3305	190.799	115.41	167.604	266.891	109.883	123.637
FBgn0015221	34384.3	41116.8	28903.8	17273.9	41992.9	36048.1	0.10556	0.73418	0.99972	Fer2LCH	3R	+	30387804	30390584	1648	protein_coding	NA	44382	32757	29436	22400	36415	31342	1894.21	1740.02	1463.26	1098.61	1719.04	1452.19
FBgn0015222	32129.8	39236.5	29438.9	14945	34561.8	31924.8	0.24976	0.41435	0.99972	Fer1HCH	3R	-	30385573	30388178	2376	protein_coding	NA	41472	31259	29981	19380	29971	27757	1713.05	1607.01	1442.39	919.906	1369.31	1244.7
FBgn0015229	1231.05	960.232	1097.79	1504.52	942.144	875.267	-0.012694	0.96292	0.99972	glec	3R	-	21850694	21856266	2050	protein_coding	NA	1589	765	1118	1951	817	761	39.7976	23.8464	32.6135	56.1518	22.6329	20.6915
FBgn0015239	722.828	731.785	723.674	674.76	673.454	705.044	0.079416	0.68917	0.99972	Hr78	3L	-	21494019	21497494	2420	protein_coding	NA	933	583	737	875	584	613	21.1029	16.4119	19.4156	22.7427	14.6103	15.0521
FBgn0015240	613.59	415.473	530.236	638.516	389.773	512.968	0.014369	0.95813	0.99972	Hr96	3R	+	25025235	25029351	2834	protein_coding	NA	792	331	540	828	338	446	14.3487	7.46351	11.3947	17.2382	6.77312	8.77196
FBgn0015245	4310.62	4437.15	4408.82	5063.4	2826.43	4127.9	0.11387	0.6617	0.99972	Hsp60	X	+	11108482	11112308	2480	protein_coding	NA	5564	3535	4490	6566	2451	3589	121.928	96.4122	114.6	165.344	59.4077	85.3813
FBgn0015247	912.638	1206.25	1012.36	1051.85	1125.5	1264.02	-0.12407	0.58301	0.99972	Diap2	2R	-	15932170	15934825	2134	protein_coding	NA	1178	961	1031	1364	976	1099	29.4751	29.9268	30.0463	39.2191	27.0112	29.8526
FBgn0015268	10.0716	30.1249	3.92768	19.2789	18.4508	6.90092	-0.018944	0.96105	0.99972	Nap1	2R	-	23905175	23907294	1582	protein_coding	NA	13	24	4	25	16	6	0.484726	1.11376	0.173714	1.07119	0.659869	0.242873
FBgn0015269	674.794	488.275	558.712	773.468	571.975	533.671	-0.11067	0.66674	0.99972	Nf1	3R	+	25983013	25995737	10064	protein_coding	NA	871	389	569	1003	496	464	4.76712	2.64981	3.62721	6.3083	3.00265	2.75696
FBgn0015270	354.829	130.541	260.209	682.472	121.083	231.181	-0.28602	0.45428	0.99972	Orc2	3R	+	13964885	13967075	1995	protein_coding	NA	458	104	265	885	105	201	11.7872	3.33124	7.9435	26.1735	2.98895	5.61584
FBgn0015271	253.338	154.39	185.583	320.029	110.705	142.619	0.034438	0.92098	0.99972	Orc5	2L	+	13829837	13831576	1687	protein_coding	NA	327	123	189	415	96	124	9.95221	4.65913	6.69971	14.5142	3.23168	4.09702
FBgn0015277	350.18	497.061	437.936	310.004	369.016	425.557	0.1919	0.451	0.99972	Pi3K59F	2R	+	23560492	23564045	3164	protein_coding	NA	452	396	446	402	320	370	7.33481	7.99786	8.42961	7.49636	5.74362	6.51819
FBgn0015278	1018	986.591	855.252	1190.66	914.468	937.375	-0.081502	0.72095	0.99972	Pi3K68D	3L	-	11774650	11790013	7799	protein_coding	NA	1314	786	871	1544	793	815	13.4689	10.0274	10.3986	18.1868	8.99071	9.06918
FBgn0015279	1433.26	1695.78	1460.11	1410.44	1478.37	1397.44	0.090975	0.6553	0.99972	Pi3K92E	3R	-	20628972	20634732	4839	protein_coding	NA	1850	1351	1487	1829	1282	1215	20.945	19.0368	19.6084	23.7956	16.054	14.9335
FBgn0015282	1790.41	1815.03	1854.85	2062.07	1878.52	1860.95	-0.081894	0.67314	0.99972	Rpt2	3R	-	23929873	23931558	1625	protein_coding	NA	2311	1446	1889	2674	1629	1618	75.915	59.1186	72.274	100.94	59.188	57.7007
FBgn0015283	2001.14	1965.65	2074.8	2072.86	1876.22	1935.71	0.035327	0.85515	0.99972	Rpn10	3L	+	21537000	21538582	1422	protein_coding	NA	2583	1566	2113	2688	1627	1683	95.4793	72.0451	90.9717	114.179	66.5208	67.5373
FBgn0015286	1288.38	1429.68	1144.92	1404.27	1787.42	1287.02	-0.19186	0.41554	0.99972	Rala	X	-	3704610	3719635	2751	protein_coding	NA	1663	1139	1166	1821	1550	1119	36.6457	31.238	29.9262	46.1121	37.7788	26.7692
FBgn0015288	9765.53	11624.5	10543.8	7301.29	10733.8	11151.9	0.11546	0.63769	0.99972	RpL22	X	-	762560	765130	1100	protein_coding	NA	12605	9261	10738	9468	9308	9696	588.352	537.997	583.767	507.839	480.547	491.317
FBgn0015295	416.807	330.119	389.822	541.35	266.383	326.644	0.0012528	0.99663	0.99972	shark	2R	-	16199426	16202884	3176	protein_coding	NA	538	263	397	702	231	284	8.69738	5.29164	7.47513	13.0412	4.13051	4.98425
FBgn0015296	695.712	784.503	647.085	629.262	634.246	706.194	0.10164	0.63635	0.99972	Shc	3L	+	9427010	9428671	1600	protein_coding	NA	898	625	659	816	550	614	28.8166	24.9617	24.6306	30.0906	19.5216	21.39
FBgn0015298	369.549	529.697	373.129	372.468	400.152	393.352	0.11038	0.65532	0.99972	Srp19	3L	-	7347310	7348034	653	protein_coding	NA	477	422	380	483	347	342	37.5053	41.2966	34.8	43.641	30.1778	29.1927
FBgn0015299	314.542	283.676	301.449	377.866	294.06	296.74	-0.096808	0.68201	0.99972	Ssb-c31a	2L	+	8211347	8211938	536	protein_coding	NA	406	226	307	490	255	258	38.8909	26.9438	34.2517	53.9376	27.0176	26.8297
FBgn0015300	0	3.76562	0	0	0	0	0.1047	0.47346	NA	Ssl	2R	-	24499243	24500267	908	protein_coding	NA	0	3	0	0	0	0	0	0.21113	0	0	0	0
FBgn0015316	6.19788	0	9.81919	3.08462	2.30635	10.3514	0.014814	0.96545	0.99972	Try29F	2L	+	8998537	8999816	1280	protein_coding	NA	8	0	10	4	2	9	0.371383	0	0.540697	0.213386	0.102694	0.453575
FBgn0015320	1124.92	956.466	1056.55	1383.45	857.962	891.369	0.0015374	0.9953	0.99972	Ubc2	2L	-	10765010	10768006	2252	protein_coding	NA	1452	762	1076	1794	744	775	44.8832	29.3157	38.7393	63.7255	25.4375	26.0072
FBgn0015321	1592.08	1317.97	1536.7	2559.46	1035.55	1436.54	-0.14375	0.64283	0.99972	Ubc4	3L	+	9698336	9700481	1709	protein_coding	NA	2055	1050	1565	3319	898	1249	73.7841	46.9211	65.4466	136.94	35.6625	48.6842
FBgn0015323	2.3242	3.76562	1.96384	3.08462	4.6127	4.60061	-0.18901	0.60054	0.99972	VAChT	3R	+	18705501	18718916	7098	protein_coding	NA	3	3	2	4	4	4	0.0217006	0.0270085	0.0168501	0.0332495	0.0320034	0.0314113
FBgn0015324	4832.02	4558.91	4560.03	5454.37	6160.26	5242.4	-0.25414	0.19898	0.99972	Vha26	3R	+	5591763	5595356	2926	protein_coding	NA	6237	3632	4644	7073	5342	4558	130.44	94.5386	113.123	169.986	123.573	103.487
FBgn0015331	243.267	219.661	261.19	299.208	215.644	242.682	-0.058892	0.81344	0.99972	abs	3R	+	4233047	4235041	1995	protein_coding	NA	314	175	266	388	187	211	8.08116	5.60544	7.97348	11.4749	5.32317	5.89524
FBgn0015336	6.19788	1.25521	4.9096	4.62693	13.8381	6.90092	-0.36044	0.33962	0.99972	CG15865	X	-	16660898	16664455	3429	protein_coding	NA	8	1	5	6	12	6	0.119787	0.0186358	0.087199	0.103239	0.19874	0.0975316
FBgn0015338	326.938	307.525	380.003	450.354	261.771	384.151	-0.097246	0.72061	0.99972	CG5861	2L	-	16305801	16307298	1126	protein_coding	NA	422	245	387	584	227	334	19.2425	13.9041	20.5533	30.601	11.4488	16.5337
FBgn0015351	100.716	101.672	120.776	92.5385	129.156	163.322	-0.20558	0.4852	0.99972	CG14906	3R	-	16649981	16651157	1177	protein_coding	NA	130	81	123	120	112	142	5.67092	4.39768	6.24939	6.01541	5.40398	6.72471
FBgn0015359	516.748	310.036	491.941	792.747	332.114	470.413	-0.21494	0.50583	0.99972	CG2034	3L	+	2257456	2258922	1284	protein_coding	NA	667	247	501	1028	288	409	28.1399	12.9694	24.6182	49.8383	13.4392	18.7324
FBgn0015360	855.307	527.186	668.687	1188.35	340.187	667.089	-0.072258	0.83459	0.99972	oxt	3L	-	2258839	2262664	3380	protein_coding	NA	1104	420	681	1541	295	580	16.7702	7.94049	12.0487	26.8996	4.95652	9.56474
FBgn0015371	1402.27	805.842	1137.06	1893.18	640.012	914.372	-0.032719	0.92334	0.99972	chn	2R	+	15115236	15144783	6256	protein_coding	NA	1810	642	1158	2455	555	795	19.5935	8.64961	14.6004	30.5393	6.64526	9.34277
FBgn0015372	838.263	1733.44	989.775	946.977	1794.34	1180.06	-0.11004	0.72936	0.99972	RabX1	2R	-	23519839	23523613	1648	protein_coding	NA	1082	1381	1008	1228	1556	1026	33.7099	53.549	36.5774	43.9645	53.6197	34.7018
FBgn0015376	343.208	248.531	362.328	514.36	230.635	284.088	-0.087939	0.78039	0.99972	cutlet	2L	-	3707230	3711748	3236	protein_coding	NA	443	198	369	667	200	247	7.02881	3.90995	6.8191	12.1612	3.50989	4.25452
FBgn0015379	340.109	316.312	285.738	450.354	242.167	313.992	-0.082521	0.76922	0.99972	dod	X	+	21345358	21346858	1021	protein_coding	NA	439	252	291	584	210	273	22.0763	15.7721	17.0442	33.748	11.6806	14.9039
FBgn0015380	18.5936	7.53123	17.6745	22.3635	31.1357	6.90092	-0.23371	0.54967	0.99972	drl	2L	+	19190342	19208621	3104	protein_coding	NA	24	6	18	29	27	6	0.396987	0.123522	0.346785	0.551235	0.493985	0.107744
FBgn0015381	2.3242	0	0	0	0	1.15015	0.039814	0.78909	NA	dsf	2L	+	5925937	5939261	3537	protein_coding	NA	3	0	0	0	0	1	0.0468179	0	0	0	0	0.016942
FBgn0015391	1039.69	613.795	895.51	2024.28	434.747	701.594	-0.20734	0.57347	0.99972	glu	2L	-	16733617	16738388	4521	protein_coding	NA	1342	489	912	2625	377	610	15.2407	6.91177	12.0634	34.2575	4.73564	7.52068
FBgn0015393	1114.07	637.644	1111.53	1701.94	638.859	945.426	-0.15152	0.6493	0.99972	hoip	2L	+	9699791	9700459	607	protein_coding	NA	1438	508	1132	2207	554	822	125.565	55.2079	115.127	221.455	53.5062	77.9213
FBgn0015396	1137.31	500.827	904.348	1653.35	366.71	706.194	-0.066967	0.85615	0.99972	jumu	3R	+	10350182	10361612	3860	protein_coding	NA	1468	399	921	2144	318	614	19.5266	6.60542	14.2686	32.7716	4.67855	8.86631
FBgn0015399	197.557	338.905	170.854	126.469	285.987	123.066	0.29426	0.39453	0.99972	kek1	2L	-	12817000	12822787	5788	protein_coding	NA	255	270	174	164	248	107	2.71631	3.57958	2.15879	2.00751	2.92198	1.23737
FBgn0015400	1.54947	2.51041	0.981919	0	5.76588	2.30031	-0.10983	0.70835	0.99972	kek2	2L	+	11581937	11626883	6939	protein_coding	NA	2	2	1	0	5	2	0.0147986	0.0184182	0.00861811	0	0.0409209	0.0160655
FBgn0015402	510.55	370.286	438.918	682.472	343.646	407.154	-0.09898	0.73879	0.99972	ksr	3R	-	5478390	5483906	5517	protein_coding	NA	659	295	447	885	298	354	7.94633	4.42722	6.27785	12.263	3.9745	4.63403
FBgn0015477	1427.84	1501.23	1334.43	1826.09	1531.42	1341.08	-0.12812	0.56644	0.99972	Rme-8	2R	-	9167763	9177261	7771	protein_coding	NA	1843	1196	1359	2368	1328	1166	12.1784	9.83615	10.4594	17.9813	9.70619	8.36449
FBgn0015509	2759.61	1863.98	2592.27	4107.94	1459.92	2093.28	-0.066609	0.83971	0.99972	Cul1	2R	+	7916856	7921579	4141	protein_coding	NA	3562	1485	2640	5327	1266	1820	54.1724	28.1086	46.7639	93.0981	21.2962	30.049
FBgn0015513	2093.33	3263.53	2122.91	1751.29	3152.78	2478.58	0.015771	0.95644	0.99972	mbc	3R	+	23781765	23801634	7465	protein_coding	NA	2702	2600	2162	2271	2734	2155	18.7271	22.4278	17.4527	18.0874	20.9589	16.2147
FBgn0015519	13.1705	3.76562	15.7107	1.54231	5.76588	0	0.61807	0.086077	0.99972	nAChRalpha3	X	-	8276200	8367169	10506	protein_coding	NA	17	3	16	2	5	0	0.12111	0.0266	0.132762	0.0163733	0.0393992	0
FBgn0015520	364.125	171.963	272.974	684.785	212.184	242.682	-0.34004	0.34807	0.99972	nonA-l	3R	+	16640205	16643112	2908	protein_coding	NA	470	137	278	888	184	211	8.81034	3.19627	6.06962	19.1285	3.81503	4.2939
FBgn0015521	9834.48	16331.5	14852.5	7388.43	13036.6	15310.8	0.16208	0.59354	0.99972	RpS21	2L	+	2856070	2857029	842	protein_coding	NA	12694	13011	15126	9581	11305	13312	1236.73	1577.67	1716.42	1072.66	1218.24	1407.97
FBgn0015522	1382.13	1681.98	1628.02	1509.15	1758.59	1732.13	-0.084306	0.6926	0.99972	olf186-M	2R	+	17846699	17848444	1746	protein_coding	NA	1784	1340	1658	1957	1525	1506	52.4611	49.0428	56.787	66.1313	49.6018	48.0776
FBgn0015524	31.7641	12.5521	11.783	5.39808	91.1008	13.8018	-0.37269	0.32868	0.99972	otp	2R	-	20883625	20903414	3368	protein_coding	NA	41	10	12	7	79	12	0.793176	0.240776	0.270389	0.155617	1.69043	0.252024
FBgn0015527	703.459	655.217	763.933	1017.15	465.883	524.47	0.064407	0.83243	0.99972	pen	X	-	21346503	21349843	2367	protein_coding	NA	908	522	778	1319	404	456	19.6958	14.0925	19.6558	32.8781	9.69293	10.7381
FBgn0015541	1079.98	1405.83	1248.02	1150.56	3201.21	3021.45	-0.76036	0.019832	0.54868	sda	3R	+	26915761	26945309	5182	protein_coding	NA	1394	1120	1271	1492	2776	2627	14.3203	14.3198	15.2075	17.613	31.5424	29.2972
FBgn0015543	27.1157	26.3593	25.5299	16.1942	19.604	11.5015	0.50102	0.16987	0.99972	snoRNA:Me28S-A1322	2R	+	11893123	11893195	73	snoRNA	NA	35	21	26	21	17	10	24.6168	18.3828	21.299	16.9729	13.2251	7.63552
FBgn0015544	457.094	239.744	364.292	735.681	204.112	364.599	-0.21095	0.55321	0.99972	spag	2R	+	24159384	24161503	1825	protein_coding	NA	590	191	371	954	177	317	16.5988	6.68783	12.1568	30.8423	5.50785	9.68184
FBgn0015546	428.428	235.979	321.088	620.008	145.3	270.286	-0.049443	0.89207	0.99972	spel1	2L	+	14362069	14366840	4433	protein_coding	NA	553	188	327	804	126	235	7.81317	3.30589	5.38111	13.0536	1.96905	3.6045
FBgn0015550	0	1.25521	0	0	0	0	0.032879	0.81996	NA	tap	3L	+	17359682	17361811	2130	protein_coding	NA	0	1	0	0	0	0	0	0.030001	0	0	0	0
FBgn0015553	643.805	264.848	555.766	1134.37	194.887	472.713	-0.18648	0.62266	0.99972	tos	2L	-	18679631	18682075	2390	protein_coding	NA	831	211	566	1471	169	411	17.8521	5.64156	14.1621	36.3141	4.01569	9.5853
FBgn0015558	194.458	266.104	185.583	222.092	392.08	493.416	-0.62319	0.04542	0.85039	tty	X	-	21328613	21339676	7616	protein_coding	NA	251	212	189	288	340	429	2.71711	2.85626	2.38297	3.58261	4.07097	5.04157
FBgn0015561	3.09894	5.02082	0	0	0	0	0.21898	0.27644	NA	unpg	2R	+	9195205	9199870	1690	protein_coding	NA	4	4	0	0	0	0	0.121523	0.151247	0	0	0	0
FBgn0015568	772.411	1117.13	912.203	710.233	1209.68	1442.29	-0.2181	0.45812	0.99972	alpha-Est1	3R	-	7545733	7549124	2123	protein_coding	NA	997	890	929	921	1049	1254	24.1119	26.7889	26.1683	25.5959	28.0606	32.9237
FBgn0015569	568.655	650.196	664.759	461.15	637.706	522.17	0.19525	0.40679	0.99972	alpha-Est10	3R	-	7486583	7493845	2341	protein_coding	NA	734	518	677	598	553	454	18.4195	16.1785	19.7876	17.2447	15.3494	12.3684
FBgn0015570	2273.85	2671.08	2497.02	937.724	1654.81	2416.47	0.46066	0.13609	0.99972	alpha-Est2	3R	+	7541810	7545230	2141	protein_coding	NA	2935	2128	2543	1216	1435	2101	73.5091	66.3335	74.1825	34.9978	39.753	57.126
FBgn0015571	638.382	785.759	552.82	552.146	1285.79	1017.89	-0.42836	0.16419	0.99972	alpha-Est3	3R	-	7538972	7541631	1932	protein_coding	NA	824	626	563	716	1115	885	23.2969	22.0279	18.5397	23.2626	34.8683	27.1637
FBgn0015572	55.0062	70.2915	50.0779	47.0404	122.237	83.9612	-0.38794	0.2598	0.99972	alpha-Est4	3R	-	7536687	7538615	1749	protein_coding	NA	71	56	51	61	106	73	2.08428	2.04604	1.74377	2.05779	3.44182	2.32646
FBgn0015574	5.42314	6.27603	0	7.71154	0	2.30031	0.032015	0.91309	0.99972	alpha-Est6	3R	-	7524567	7528777	1836	protein_coding	NA	7	5	0	10	0	2	0.195755	0.174025	0	0.321357	0	0.0607182
FBgn0015575	2507.82	3972.72	2942.81	1859.25	4142.2	5159.59	-0.18876	0.56413	0.99972	alpha-Est7	3R	-	7519563	7523753	2017	protein_coding	NA	3237	3165	2997	2411	3592	4486	82.3993	100.273	88.8566	70.5264	101.135	123.97
FBgn0015576	952.924	1428.42	1059.49	798.916	1556.79	1675.77	-0.18611	0.53997	0.99972	alpha-Est8	3R	-	7509343	7515670	2646	protein_coding	NA	1230	1138	1079	1036	1350	1457	23.8672	27.4832	24.386	23.101	28.9745	30.6924
FBgn0015577	830.516	876.133	749.204	255.252	652.697	603.831	0.55575	0.079556	0.99972	alpha-Est9	3R	-	7493921	7505098	3455	protein_coding	NA	1072	698	763	331	566	525	16.4792	13.3544	13.6611	5.84712	9.62369	8.76142
FBgn0015582	159.595	151.88	169.872	202.042	131.462	182.874	-0.089413	0.73874	0.99972	dare	2R	-	11290994	11293174	1681	protein_coding	NA	206	121	173	262	114	159	6.29197	4.59973	6.15442	9.1959	3.85131	5.27219
FBgn0015585	6.19788	6.27603	0.981919	4.62693	11.5318	4.60061	-0.20948	0.57227	0.99972	Acp63F	3L	-	3815839	3816354	401	protein_coding	NA	8	5	1	6	10	4	1.14415	0.890001	0.166577	0.986092	1.58189	0.621051
FBgn0015589	875.45	923.831	913.185	1118.94	829.133	771.753	-0.0044721	0.98496	0.99972	Apc	3R	-	28832301	28844748	8506	protein_coding	NA	1130	736	930	1451	719	671	6.92426	5.61307	6.63743	10.2173	4.87314	4.46367
FBgn0015591	115.435	56.4842	26.5118	30.075	121.083	78.2104	-0.11527	0.7654	0.99972	AstA	3R	-	24760530	24765071	1459	protein_coding	NA	149	45	27	39	105	68	6.08608	2.28766	1.28451	1.83059	4.74379	3.01533
FBgn0015600	1609.12	844.753	1364.87	2244.83	754.176	1107.6	-0.07763	0.82112	0.99972	toc	2L	-	3068345	3144786	11265	protein_coding	NA	2077	673	1390	2911	654	963	24.2696	9.78746	18.9175	39.0879	8.45259	12.216
FBgn0015602	496.605	347.692	433.026	636.973	265.23	445.109	-0.062128	0.84252	0.99972	BEAF-32	2R	+	14770469	14772630	1919	protein_coding	NA	641	277	441	826	230	387	25.1615	13.5328	20.1623	37.2592	9.98601	16.4917
FBgn0015609	58.1051	53.9738	26.5118	29.3039	44.9738	23.0031	0.35273	0.33056	0.99972	CadN	2L	-	17647053	17778340	14396	protein_coding	NA	75	43	27	38	39	20	0.338768	0.241734	0.142045	0.197242	0.194846	0.0980722
FBgn0015614	1510.73	1645.57	1629.99	1710.42	1674.41	1514.75	-0.031715	0.87337	0.99972	CanB2	2R	+	7786010	7789053	2061	protein_coding	NA	1950	1311	1660	2218	1452	1317	62.497	52.2944	61.9662	81.6883	51.4726	45.8232
FBgn0015615	765.438	528.441	700.108	1144.39	417.449	502.617	-0.038659	0.90793	0.99972	SMC3	X	-	16588996	16593439	4020	protein_coding	NA	988	421	713	1484	362	437	12.6188	6.69223	10.6065	21.7805	5.11393	6.05922
FBgn0015618	168.892	92.8852	125.686	155.002	78.4159	115.015	0.11963	0.71147	0.99972	Cdk8	3L	-	9837080	9838670	1529	protein_coding	NA	218	74	128	201	68	100	7.32042	3.09271	5.00624	7.7562	2.52565	3.64548
FBgn0015621	199.107	115.479	248.426	362.443	108.398	197.826	-0.17471	0.62558	0.99972	Clp	2L	+	819964	821209	1246	protein_coding	NA	257	92	253	470	94	172	10.5901	4.71829	12.1426	22.2557	4.28432	7.69435
FBgn0015622	2883.56	2751.41	2525.5	2831.68	2705.35	2700.56	-0.012678	0.94816	0.99972	Cnx99A	3R	-	29315254	29319644	2795	protein_coding	NA	3722	2192	2572	3672	2346	2348	76.8091	56.2996	61.8201	87.0789	53.5488	52.6029
FBgn0015623	8338.47	10307.7	9478.47	6584.12	15416.8	12414.8	-0.23886	0.42607	0.99972	Cpr	2L	+	6338836	6346280	3344	protein_coding	NA	10763	8212	9653	8538	13369	10794	217.649	206.681	227.357	198.406	299.025	236.963
FBgn0015625	2011.21	1033.03	1987.4	3723.9	724.194	1422.74	-0.145	0.69716	0.99972	CycB3	3R	-	24867934	24870816	2883	protein_coding	NA	2596	823	2024	4829	628	1237	49.8833	19.6824	45.2984	106.63	13.3474	25.8045
FBgn0015663	127.831	151.88	155.143	124.156	197.193	242.682	-0.3071	0.30269	0.99972	Dot	2L	+	3619097	3621573	2303	protein_coding	NA	165	121	158	161	171	211	4.21059	3.84302	4.69611	4.72127	4.82659	5.84543
FBgn0015664	660.074	495.806	640.211	953.147	335.574	486.515	0.012175	0.97053	0.99972	Dref	2L	-	9964147	9967229	2872	protein_coding	NA	852	395	652	1236	291	423	15.5897	8.99548	13.8953	25.9891	5.88948	8.40261
FBgn0015714	120.084	138.073	127.649	66.3193	144.147	136.868	0.12372	0.69673	0.99972	Cyp6a17	2R	+	14873953	14875739	1727	protein_coding	NA	155	110	130	86	125	119	4.8615	4.29397	4.74902	3.09963	4.33644	4.05191
FBgn0015721	2.3242	3.76562	0	3.08462	0	9.20123	-0.16284	0.57344	0.99972	ktub	2R	+	21101928	21123704	2523	protein_coding	NA	3	3	0	4	0	8	0.0613669	0.076377	0	0.0940258	0	0.177655
FBgn0015737	2375.34	2658.52	2345.8	2416.03	2638.46	2752.32	-0.075424	0.70733	0.99972	Hmu	3R	+	27288769	27291592	2360	protein_coding	NA	3066	2118	2389	3133	2288	2393	66.7033	57.3494	60.5359	78.3266	55.0574	56.5187
FBgn0015754	1954.66	2112.51	2146.48	2398.29	2071.1	2165.74	-0.088308	0.65917	0.99972	Lis-1	2R	+	16178826	16185103	3459	protein_coding	NA	2523	1683	2186	3110	1796	1883	48.8646	40.5685	49.3116	69.2168	38.4741	39.5915
FBgn0015756	17553.9	24560.6	19199.5	13135.8	20662.6	21356.1	0.13211	0.62103	0.99972	RpL9	2L	-	11002758	11004189	916	protein_coding	NA	22658	19567	19553	17034	17918	18568	1474.45	1584.75	1481.99	1273.8	1289.69	1311.75
FBgn0015765	328.488	376.562	273.955	357.816	297.519	288.689	0.04438	0.85729	0.99972	p38a	3R	-	24150416	24152321	1634	protein_coding	NA	424	300	279	464	258	251	14.3316	12.6206	10.9839	18.0227	9.6457	9.21038
FBgn0015766	7757.42	10907.7	10699	8049.31	25761.9	16274.7	-0.58581	0.079013	0.99972	Msr-110	3L	-	5566919	5577348	2902	protein_coding	NA	10013	8690	10896	10438	22340	14150	192.117	207.515	243.495	230.14	474.099	294.735
FBgn0015772	1151.26	1256.46	1104.66	1213.03	1263.88	964.979	0.026263	0.90584	0.99972	Nak	2L	-	18957732	18968744	7322	protein_coding	NA	1486	1001	1125	1573	1096	839	16.0625	13.4665	14.1634	19.5387	13.1035	9.84532
FBgn0015773	21.6926	36.401	5.89151	12.3385	55.3524	13.8018	-0.15845	0.68397	0.99972	NetA	X	-	14604012	14653928	3343	protein_coding	NA	28	29	6	16	48	12	0.438567	0.565332	0.109459	0.287986	0.83158	0.204049
FBgn0015774	35.6378	70.2915	38.2948	64.0058	217.95	112.715	-0.97014	0.0083347	0.32226	NetB	X	-	14686038	14749376	8168	protein_coding	NA	46	56	39	83	189	98	0.356123	0.539583	0.351665	0.738404	1.61841	0.823651
FBgn0015776	3043.16	3089.06	2890.77	2908.79	3799.71	2828.23	-0.072733	0.74317	0.99972	nrv1	2L	-	6778555	6786861	2195	protein_coding	NA	3928	2461	2944	3772	3295	2459	97.8544	76.3042	85.4218	107.983	90.7924	66.5032
FBgn0015777	478.011	608.775	524.345	402.543	1425.32	915.522	-0.57079	0.094269	0.99972	nrv2	2L	-	6789770	6798862	3568	protein_coding	NA	617	485	534	522	1236	796	14.0484	13.7439	14.1613	13.6579	31.1275	19.6756
FBgn0015778	5351.09	3023.79	4410.78	7354.5	2816.05	3542.47	-0.077202	0.81617	0.99972	rin	3R	+	13647004	13654527	5711	protein_coding	NA	6907	2409	4492	9537	2442	3080	92.5929	40.1932	70.1375	146.918	36.2092	44.8243
FBgn0015781	357.153	538.483	470.339	355.502	380.548	567.026	0.057529	0.83679	0.99972	P5cr	3R	+	19028931	19030159	1168	protein_coding	NA	461	429	479	461	330	493	20.2649	23.4709	24.5246	23.2873	16.0451	23.527
FBgn0015789	2228.14	2402.46	2421.41	2655.86	2562.35	2342.86	-0.093922	0.63337	0.99972	Rab10	X	+	20251338	20254691	2336	protein_coding	NA	2876	1914	2466	3444	2222	2037	63.2125	52.3581	63.129	86.9863	54.0186	48.6049
FBgn0015790	3219.8	4157.24	3519.2	3311.34	4191.79	4066.94	-0.078646	0.72762	0.99972	Rab11	3R	+	21111408	21116146	1815	protein_coding	NA	4156	3312	3584	4294	3635	3536	123.989	122.977	124.536	147.212	119.949	114.523
FBgn0015791	1096.25	1205	1096.8	1027.18	1393.04	1249.07	-0.10054	0.65294	0.99972	Rab14	2L	+	14355145	14358764	1857	protein_coding	NA	1415	960	1117	1332	1208	1086	62.4152	52.7027	57.3864	67.5168	58.9367	52.0042
FBgn0015793	509.776	681.576	460.52	384.035	656.157	622.233	-0.0074223	0.97913	0.99972	Rab19	3L	+	8297018	8298506	1105	protein_coding	NA	658	543	469	498	569	541	32.2368	33.1096	26.7621	28.0368	30.8335	28.7738
FBgn0015794	426.104	676.556	615.663	448.041	713.815	794.756	-0.15631	0.59056	0.99972	Rab18	X	-	5670827	5671812	833	protein_coding	NA	550	539	627	581	619	691	33.9004	41.3484	45.0123	41.1521	42.2005	46.2375
FBgn0015795	2982.73	4562.67	3332.63	2284.93	4355.54	3743.75	0.056004	0.84693	0.99972	Rab7	3R	+	23993008	23995452	1700	protein_coding	NA	3850	3635	3394	2963	3777	3255	145.884	171.427	149.79	129.019	158.3	133.898
FBgn0015797	1116.39	1305.41	1212.67	1196.06	1326.15	1257.12	-0.052438	0.79709	0.99972	Rab6	2L	-	12107221	12109116	1896	protein_coding	NA	1441	1040	1235	1551	1150	1093	39.7135	35.6726	39.6427	49.1201	35.0556	32.7016
FBgn0015799	1471.22	794.545	1175.36	2173.11	622.715	952.327	-0.088297	0.80253	0.99972	Rbf	X	-	797090	801479	3619	protein_coding	NA	1899	633	1197	2818	540	828	26.9416	11.1771	19.7795	45.9423	8.47378	12.7527
FBgn0015801	666.272	1028.01	686.361	517.445	1169.32	754.501	-0.028909	0.92638	0.99972	Reg-5	2R	-	24788008	24793410	1781	protein_coding	NA	860	819	699	671	1014	656	25.7167	30.4809	24.3453	23.0575	33.5382	21.2959
FBgn0015803	729.8	926.342	804.192	922.301	1035.55	872.967	-0.18523	0.40243	0.99972	RtGEF	2L	+	20350434	20365254	8609	protein_coding	NA	942	738	819	1196	898	759	12.5073	12.1954	12.6654	18.2481	13.1879	10.9403
FBgn0015805	1042.79	781.993	1088.95	1829.95	687.292	948.877	-0.19564	0.546	0.99972	Rpd3	3L	+	4626734	4629467	2124	protein_coding	NA	1346	623	1109	2373	596	825	32.537	18.7434	31.2238	65.918	15.9354	21.6502
FBgn0015806	2437.32	2397.44	2421.41	1916.32	2397.45	2353.21	0.11304	0.5881	0.99972	S6k	3L	-	5797549	5810931	4885	protein_coding	NA	3146	1910	2466	2485	2079	2046	38.5875	29.1574	35.2292	35.0258	28.2051	27.2438
FBgn0015808	2329.63	3254.75	2551.03	1814.53	2786.07	3571.23	-0.0053448	0.98508	0.99972	ScpX	2L	+	18831229	18833630	1883	protein_coding	NA	3007	2593	2598	2353	2416	3105	81.9917	87.9968	82.5083	73.728	72.8649	91.9122
FBgn0015818	479.561	249.786	437.936	586.848	280.222	317.442	-0.016668	0.95927	0.99972	Spx	X	+	6255822	6257596	1643	protein_coding	NA	619	199	446	761	243	276	19.3437	7.73981	16.2333	27.328	8.39925	9.36339
FBgn0015828	611.266	522.165	665.741	795.831	508.55	639.485	-0.098515	0.6998	0.99972	TfIIEalpha	3L	+	11682038	11683805	1622	protein_coding	NA	789	416	678	1032	441	556	24.9754	16.3892	24.997	37.5396	15.4404	19.1067
FBgn0015829	271.157	320.077	284.757	286.098	304.438	315.142	-0.044432	0.84339	0.99972	TfIIEbeta	3L	+	4287038	4288349	1121	protein_coding	NA	350	255	290	371	264	274	16.5625	15.0185	15.9837	20.1746	13.818	14.0761
FBgn0015831	3.09894	0	0	0	0	0	0.1008	0.48937	NA	Rtnl2	3R	-	7528864	7530241	1026	protein_coding	NA	4	0	0	0	0	0	0.214155	0	0	0	0	0
FBgn0015834	2285.47	2627.14	2686.53	2593.39	2527.76	2737.37	-0.045119	0.82229	0.99972	Trip1	2L	-	4966367	4967775	1177	protein_coding	NA	2950	2093	2736	3363	2192	2380	128.686	113.634	139.011	168.582	105.764	112.71
FBgn0015838	644.579	372.796	627.446	975.51	253.699	433.608	-0.011517	0.97436	0.99972	Vang	2R	+	9103238	9106796	3492	protein_coding	NA	832	297	639	1265	220	377	12.2331	5.43497	10.943	21.3736	3.57784	6.01768
FBgn0015872	469.489	492.04	377.057	488.912	1297.32	677.44	-0.68678	0.033588	0.74209	Drip	2R	-	11411203	11429645	2499	protein_coding	NA	606	392	384	634	1125	589	21.6673	17.444	15.9914	26.0493	44.4908	22.8624
FBgn0015903	901.017	466.936	790.445	1458.25	395.539	510.668	-0.090489	0.80317	0.99972	apt	2R	+	23564891	23599526	3696	protein_coding	NA	1163	372	805	1891	343	444	21.8328	8.69161	17.6014	40.7939	7.12211	9.04872
FBgn0015904	2.3242	0	0.981919	0.771154	4.6127	0	-0.070656	0.77509	0.99972	ara	3L	+	12580672	12596018	2942	protein_coding	NA	3	0	1	1	4	0	0.0525703	0	0.0204099	0.0201369	0.077529	0
FBgn0015905	279.679	209.619	250.389	380.179	125.696	224.28	0.012615	0.97001	0.99972	ast	2L	+	1077948	1080803	2745	protein_coding	NA	361	167	255	493	109	195	6.7523	3.88767	5.55529	10.5966	2.25505	3.95962
FBgn0015919	2.3242	3.76562	8.83727	0.771154	3.45953	16.1021	-0.11672	0.73805	0.99972	caup	3L	+	12609631	12621798	4317	protein_coding	NA	3	3	9	1	3	14	0.0356801	0.0444073	0.124672	0.0136672	0.0394649	0.180762
FBgn0015924	2758.06	4291.55	3076.35	3092.33	5742.81	4330.33	-0.31773	0.26884	0.99972	crq	2L	-	448254	453024	2848	protein_coding	NA	3560	3419	3133	4010	4980	3765	79.2643	94.7446	81.2475	102.6	122.643	91.0054
FBgn0015925	392.016	194.557	325.015	490.454	272.149	295.589	-0.17008	0.59205	0.99972	csul	2R	+	16264652	16266959	2013	protein_coding	NA	506	155	331	636	236	257	12.9511	4.9376	9.86748	18.7063	6.68118	7.14108
FBgn0015926	495.056	286.187	565.585	913.818	161.445	420.956	-0.098086	0.79339	0.99972	dah	X	+	15328342	15331002	2353	protein_coding	NA	639	228	576	1185	140	366	13.9671	6.2025	14.6639	29.7643	3.38467	8.6848
FBgn0015929	1307.75	607.519	1018.25	2122.99	480.874	844.213	-0.15581	0.67223	0.99972	dpa	2R	-	7496702	7500145	3071	protein_coding	NA	1688	484	1037	2753	417	734	29.5091	10.5307	21.1146	55.3048	8.06314	13.9301
FBgn0015949	998.633	765.675	947.552	1204.54	923.693	768.303	-0.083573	0.74457	0.99972	hrg	2R	-	19663919	19669832	4587	protein_coding	NA	1289	610	965	1562	801	668	17.5829	10.3561	15.3316	24.4845	12.0852	9.8921
FBgn0016013	197.557	540.993	409.46	232.117	473.955	423.256	0.017153	0.96003	0.99972	Faa	3L	-	4072032	4073954	1421	protein_coding	NA	255	431	417	301	411	368	9.21368	19.382	17.5489	12.4978	16.4255	14.435
FBgn0016031	1942.26	1905.4	1888.23	1819.15	1615.6	2118.58	0.04294	0.84058	0.99972	lama	3L	-	5343619	5355923	4046	protein_coding	NA	2507	1518	1923	2359	1401	1842	38.9466	29.3505	34.795	42.1131	24.0735	31.0656
FBgn0016032	83.6714	179.494	148.27	36.2443	152.219	111.565	0.3006	0.41793	0.99972	lbm	2R	+	7049238	7051964	1098	protein_coding	NA	108	143	151	47	132	97	5.68147	9.3627	9.25201	2.84125	7.68061	5.53967
FBgn0016034	605.068	289.952	467.394	1040.29	294.06	487.665	-0.29459	0.40994	0.99972	mael	3L	+	22721203	22726234	2152	protein_coding	NA	781	231	476	1349	255	424	21.183	7.79787	15.0371	42.0457	7.65	12.4847
FBgn0016036	37.1873	8.78644	17.6745	20.8212	2.30635	4.60061	0.46671	0.22293	0.99972	mei-P22	3L	+	7244388	7245383	996	protein_coding	NA	48	7	18	27	2	4	2.47439	0.449111	1.08074	1.59943	0.114036	0.223853
FBgn0016038	436.176	465.681	530.236	510.504	491.253	493.416	-0.057475	0.79024	0.99972	mod(r)	X	+	621530	623051	1379	protein_coding	NA	563	371	540	662	426	429	22.4604	18.4209	25.0914	30.3487	18.7976	18.5798
FBgn0016041	1527	1134.71	1520.01	2441.47	846.43	1250.22	-0.091118	0.78191	0.99972	Tom40	X	+	7736893	7739978	2395	protein_coding	NA	1971	904	1548	3166	734	1087	51.1878	29.2198	46.8245	94.4854	21.0844	30.6468
FBgn0016047	48.8083	52.7186	57.9332	13.8808	35.7484	49.4566	0.46799	0.203	0.99972	nompA	2R	-	11310335	11318676	5235	protein_coding	NA	63	42	59	18	31	43	0.645897	0.53592	0.704525	0.212065	0.351536	0.478592
FBgn0016053	997.084	461.916	999.594	2197.79	344.799	759.101	-0.26019	0.4947	0.99972	pgc	2R	+	22330200	22332813	1212	protein_coding	NA	1287	368	1018	2850	299	660	78.0157	27.7638	71.8743	198.528	20.0475	43.4332
FBgn0016054	72.8251	28.8697	52.0417	186.619	21.9103	63.2584	-0.43895	0.2603	0.99972	phr6-4	2L	-	20643351	20645791	2167	protein_coding	NA	94	23	53	242	19	55	2.32593	0.708312	1.52745	6.8811	0.520005	1.47743
FBgn0016059	2786.72	3289.89	2767.05	3031.41	4139.9	2883.43	-0.16585	0.48788	0.99972	Sema-1b	2R	-	17672839	17683499	4565	protein_coding	NA	3597	2621	2818	3931	3590	2507	44.5342	40.3876	40.6365	55.928	49.1623	33.6963
FBgn0016061	17.8189	15.0625	14.7288	13.1096	63.4246	23.0031	-0.57444	0.13964	0.99972	side	3R	-	27375088	27437482	11723	protein_coding	NA	23	12	15	17	55	20	0.168196	0.109219	0.127762	0.14286	0.444873	0.158779
FBgn0016070	7799.26	3612.48	7655.04	12864.4	2448.19	5171.09	-0.066729	0.85842	0.99972	smg	3L	-	8990317	8997989	5963	protein_coding	NA	10067	2878	7796	16682	2123	4496	111.156	39.5506	100.26	211.668	25.928	53.8933
FBgn0016075	12034	25665.2	12731.6	9379.55	26231.3	18885.5	-0.082225	0.81161	0.99972	vkg	2L	-	5012144	5028191	6503	protein_coding	NA	15533	20447	12966	12163	22747	16420	124.866	204.573	121.4	112.358	202.255	143.297
FBgn0016076	1902.75	2723.8	2011.95	1064.19	2723.8	2035.77	0.15018	0.63465	0.99972	vri	2L	+	5288944	5311223	4739	protein_coding	NA	2456	2170	2049	1380	2362	1770	34.4347	37.8666	33.4605	22.2342	36.6297	26.9412
FBgn0016078	379.62	438.067	402.587	476.573	604.264	441.659	-0.28687	0.22604	0.99972	wun	2R	-	9400531	9413463	2181	protein_coding	NA	490	349	410	618	524	384	14.4755	12.8319	14.1073	20.9797	17.122	12.3152
FBgn0016080	44.1599	42.677	28.4757	18.5077	13.8381	19.5526	0.80848	0.023155	0.59127	xmas-1	X	-	17151231	17154592	2852	protein_coding	NA	57	34	29	24	12	17	1.02615	0.761806	0.608075	0.496504	0.238948	0.332247
FBgn0016081	945.951	1135.96	1054.58	1106.61	1727.46	1083.44	-0.27976	0.2837	0.99972	fry	3L	-	9631834	9679103	11788	protein_coding	NA	1221	905	1074	1435	1498	942	5.66874	5.22935	5.80761	7.65591	7.69251	4.74785
FBgn0016119	2538.03	3722.94	2738.57	2343.54	2752.63	3243.43	0.096864	0.70055	0.99972	ATPsyn-Cf6	3R	-	23355220	23356064	704	protein_coding	NA	3276	2966	2789	3039	2387	2820	292.017	329.051	289.558	311.293	235.343	272.89
FBgn0016120	3074.15	4516.23	3405.3	2675.91	3835.46	4074.99	0.047595	0.85647	0.99972	ATPsyn-d	3R	+	19095000	19096271	950	protein_coding	NA	3968	3598	3468	3470	3326	3543	256.913	289.936	261.526	258.177	238.189	249.035
FBgn0016122	1192.32	2207.91	1267.66	1526.11	3054.76	3465.41	-0.61107	0.059994	0.96271	Acer	2L	+	8521933	8525740	3198	protein_coding	NA	1539	1759	1291	1979	2649	3013	28.5263	40.579	27.8712	42.1528	54.3093	60.6291
FBgn0016123	2628.68	2751.41	1900.01	1670.32	4127.21	1390.54	0.013789	0.96768	0.99972	Aph-4	3R	+	31048929	31052540	2412	protein_coding	NA	3393	2192	1935	2166	3579	1209	83.4734	67.1171	55.4457	61.2346	97.3893	32.2898
FBgn0016126	6068.5	7465.96	5887.59	3201.83	5770.49	7105.65	0.2255	0.44582	0.99972	CaMKI	4	+	445504	453947	3382	protein_coding	NA	7833	5948	5996	4152	5004	6178	157.654	148.996	140.559	96.0301	111.398	134.989
FBgn0016131	227.772	146.859	206.203	286.098	116.471	149.52	0.054384	0.86959	0.99972	Cdk4	2R	+	16579470	16585448	2462	protein_coding	NA	294	117	210	371	101	130	9.01196	4.46361	7.49745	13.0683	3.42435	4.32604
FBgn0016641	816.571	554.801	789.463	1090.41	412.837	700.443	-0.022587	0.94409	0.99972	PTP-ER	2R	-	21619321	21624446	5069	protein_coding	NA	1054	442	804	1414	358	609	10.6759	5.57205	9.48512	16.4584	4.01081	6.69664
FBgn0016650	81.3472	64.0155	47.1321	67.0904	130.309	54.0572	-0.27598	0.42862	0.99972	Lgr1	3R	+	17725777	17733207	3222	protein_coding	NA	105	51	48	87	113	47	1.69159	1.02259	0.900675	1.61064	2.01358	0.822011
FBgn0016660	8.52208	38.9114	13.7469	12.3385	68.0373	18.4025	-0.32	0.41147	0.99972	H15	2L	+	5404280	5416593	3282	protein_coding	NA	11	31	14	16	59	16	0.203745	0.714633	0.302026	0.340555	1.20873	0.321728
FBgn0016672	413.708	386.603	458.556	489.683	482.027	427.857	-0.13958	0.52564	0.99972	Ipp	3R	+	13958789	13960474	1402	protein_coding	NA	534	308	467	635	418	372	19.556	14.0384	19.9195	26.7231	16.9317	14.7896
FBgn0016675	298.273	749.358	494.887	125.698	559.29	240.382	0.48073	0.19659	0.99972	Lectin-galC1	2L	+	19417447	19418274	759	protein_coding	NA	385	597	504	163	485	209	27.0415	52.1881	41.2308	13.1562	37.6787	15.9364
FBgn0016684	399.763	219.661	90.3366	70.175	41.5143	65.5587	1.324	0.00032777	0.03246	NaPi-T	2R	-	14842720	14845874	2660	protein_coding	NA	516	175	92	91	36	57	11.5742	4.88548	2.40354	2.34561	0.893159	1.388
FBgn0016685	2249.06	1605.41	2121.93	2762.27	1424.17	1650.47	0.028213	0.92277	0.99972	Nlp	3R	+	30004785	30010352	1080	protein_coding	NA	2903	1279	2161	3582	1235	1435	149.499	81.9767	129.619	211.978	70.3467	80.2266
FBgn0016687	5360.39	7921.6	6334.36	3792.54	6137.2	8093.63	0.10091	0.73376	0.99972	Nurf-38	2R	-	24558967	24561087	1481	protein_coding	NA	6919	6311	6451	4918	5322	7037	295.793	335.792	321.213	241.605	251.654	326.593
FBgn0016691	3055.55	4586.52	3361.11	2476.18	3616.36	3968.03	0.11122	0.68111	0.99972	Oscp	3R	+	15265591	15266690	802	protein_coding	NA	3944	3654	3423	3211	3136	3450	252.493	291.145	255.236	236.225	222.062	239.776
FBgn0016693	2071.64	3208.3	2113.09	1925.57	3230.04	2308.36	-0.011712	0.96692	0.99972	Past1	3R	+	12697322	12704875	2896	protein_coding	NA	2674	2556	2152	2497	2801	2007	60.4017	71.8582	56.6176	64.8156	69.9819	49.2164
FBgn0016694	3611.04	4555.14	3546.69	1937.14	4790.29	4148.6	0.085973	0.78223	0.99972	Pdp1	3L	-	7811458	7867369	12138	protein_coding	NA	4661	3629	3612	2512	4154	3607	50.6268	49.0587	45.6953	31.3541	49.906	42.5326
FBgn0016696	1750.13	1433.44	1717.38	2185.45	1439.16	1671.17	-0.099496	0.68591	0.99972	Pitslre	3L	+	20771528	20776931	4544	protein_coding	NA	2259	1142	1749	2834	1248	1453	31.1789	19.6172	28.1162	44.9487	19.0521	21.7713
FBgn0016697	1237.25	1477.38	1553.4	1494.5	1329.61	1428.49	0.0043328	0.98381	0.99972	Prosalpha5	2R	+	17412767	17413769	945	protein_coding	NA	1597	1177	1582	1938	1153	1242	93.2831	85.5662	107.628	130.085	74.4925	78.7579
FBgn0016698	319.966	276.145	248.426	357.044	230.635	293.289	-0.053998	0.83764	0.99972	Ptpa	2L	+	3377002	3378590	1393	protein_coding	NA	413	220	253	463	200	255	15.2225	10.0922	10.8612	19.6106	8.15363	10.2035
FBgn0016700	1553.34	1828.83	1484.66	1263.15	2024.98	1783.89	-0.052233	0.83685	0.99972	Rab1	3R	-	21266029	21269060	1804	protein_coding	NA	2005	1457	1512	1638	1756	1551	57.0643	51.6105	50.1215	53.572	55.279	47.9222
FBgn0016701	868.478	1050.61	853.288	849.041	1096.67	970.73	-0.066267	0.77124	0.99972	Rab4	2R	+	17573462	17574979	1316	protein_coding	NA	1121	837	869	1101	951	844	50.2675	46.7127	45.3861	56.7339	47.1679	41.0865
FBgn0016715	1363.53	2374.85	1707.56	1278.57	2519.69	2920.24	-0.24026	0.44802	0.99972	Reg-2	3L	-	605165	606569	883	protein_coding	NA	1760	1892	1739	1658	2185	2539	102.338	136.923	117.774	110.786	140.528	160.274
FBgn0016726	12718.8	16395.5	15220.7	9032.53	16322	16557.6	0.068981	0.80458	0.99972	RpL29	2R	+	21293768	21294404	389	protein_coding	NA	16417	13062	15501	11713	14154	14396	2471.87	2447.77	2718.41	2026.63	2357.2	2353.15
FBgn0016754	562.458	524.676	447.755	488.141	565.056	491.116	-0.0073717	0.97389	0.99972	sba	3R	-	23894174	23922973	6427	protein_coding	NA	726	418	456	633	490	427	6.44793	4.62049	4.71705	6.46043	4.81354	4.11705
FBgn0016756	2279.27	2598.28	2200.48	3012.13	3360.35	2587.85	-0.31123	0.1548	0.99972	Ubp64E	3L	+	5752973	5761886	5636	protein_coding	NA	2942	2070	2241	3906	2914	2250	28.6737	25.1096	25.4393	43.7469	31.4135	23.8067
FBgn0016762	114.661	105.437	109.975	106.419	85.335	108.114	0.11946	0.654	0.99972	angel	2R	+	23694003	23695232	1230	protein_coding	NA	148	84	112	138	74	94	6.17794	4.36404	5.4453	6.61964	3.41663	4.25975
FBgn0016792	1038.14	539.738	982.901	1678.03	393.233	751.05	-0.095929	0.79216	0.99972	dmt	3R	+	9711142	9714675	3190	protein_coding	NA	1340	430	1001	2176	341	653	21.5676	8.61376	18.7652	40.2466	6.07066	11.41
FBgn0016794	1316.27	1423.4	1319.7	1391.16	1194.69	1167.41	0.10395	0.61511	0.99972	dos	3L	+	2589414	2595590	4666	protein_coding	NA	1699	1134	1344	1804	1036	1015	22.0285	18.2992	20.2961	26.8783	14.8572	14.2867
FBgn0016797	310.669	483.254	278.865	357.044	527.001	379.551	-0.19837	0.49309	0.99972	fz2	3L	-	19140975	19235373	7422	protein_coding	NA	401	385	284	463	457	330	4.54499	5.43097	3.74912	6.03036	5.72915	4.06048
FBgn0016917	5915.1	7258.85	5900.35	4910.71	6852.17	7879.7	-0.037294	0.88262	0.99972	Stat92E	3R	-	20535323	20552311	5210	protein_coding	NA	7635	5783	6009	6368	5942	6851	103.106	97.1977	94.5146	98.8215	88.7549	100.439
FBgn0016919	0.774735	0	7.85535	1.54231	3.45953	1.15015	0.084895	0.77185	0.99972	nompB	2L	-	21578292	21589423	2794	protein_coding	NA	1	0	8	2	3	1	0.0188833	0	0.17595	0.0433992	0.0626591	0.0204999
FBgn0016920	27.1157	10.0416	25.5299	24.6769	28.8294	41.4055	-0.36907	0.32487	0.99972	nompC	2L	+	5346237	5365760	7579	protein_coding	NA	35	8	26	32	25	36	0.283354	0.0806081	0.245164	0.297704	0.223865	0.316401
FBgn0016926	4256.39	6678.95	5346.55	2768.44	5693.23	4665.02	0.25631	0.38859	0.99972	Pino	2L	-	1114654	1128953	2497	protein_coding	NA	5494	5321	5445	3590	4937	4056	136.734	164.82	157.837	102.673	135.905	109.587
FBgn0016930	668.596	833.456	633.338	742.622	792.231	595.78	0.0019944	0.99338	0.99972	Dyrk2	2L	-	14184478	14234126	4955	protein_coding	NA	863	664	645	963	687	518	10.377	9.93699	9.03318	13.3064	9.13694	6.76182
FBgn0016970	117.76	84.0988	103.102	162.714	88.7945	104.664	-0.18227	0.55504	0.99972	l(2)k10201	2R	+	9399080	9399899	820	protein_coding	NA	152	67	105	211	77	91	9.51736	5.22127	7.65745	15.182	5.33272	6.18571
FBgn0016974	31.7641	30.1249	49.096	33.9308	3.45953	6.90092	0.61186	0.11707	0.99972	swaPsi	X	-	6361496	6363310	1547	pseudogene	NA	41	24	50	44	3	6	1.4856	1.08232	2.11013	1.83208	0.120233	0.236017
FBgn0016977	2853.35	2412.5	2595.21	3356.83	2169.12	1851.75	0.078551	0.77175	0.99972	spen	2L	+	159032	203397	23035	protein_coding	NA	3683	1922	2643	4353	1881	1610	10.0799	6.5469	8.42507	13.6904	5.69414	4.7836
FBgn0016978	753.042	537.228	715.819	1013.3	461.27	546.323	-0.0091495	0.9764	0.99972	snRNP-U1-70K	2L	-	6968711	6971737	2948	protein_coding	NA	972	428	729	1314	400	475	20.8725	11.4388	18.233	32.4247	9.50063	11.0733
FBgn0016983	1265.92	946.425	1114.48	1788.31	929.459	978.781	-0.12661	0.66598	0.99972	smid	3L	+	7381614	7385637	3386	protein_coding	NA	1634	754	1135	2319	806	851	26.4655	15.1994	21.4114	43.1621	14.4394	14.9635
FBgn0016984	1901.2	1846.41	1762.54	2240.97	1721.69	1729.83	-0.043246	0.84414	0.99972	sktl	2R	-	20827282	20836028	4106	protein_coding	NA	2454	1471	1795	2906	1493	1504	38.181	28.4848	32.5282	51.9568	25.6932	25.4036
FBgn0017414	115.435	95.3956	108.993	122.614	96.8667	115.015	-0.055455	0.83603	0.99972	cag	2R	-	10893034	10894414	1324	protein_coding	NA	149	76	111	159	84	100	6.51081	4.13324	5.64929	7.98399	4.05988	4.74377
FBgn0017418	1147.38	1223.83	1149.83	1232.3	1110.51	1112.2	0.0249	0.90057	0.99972	ari-1	X	-	18130392	18137784	4815	protein_coding	NA	1481	975	1171	1598	963	967	23.8819	19.568	21.9934	29.6118	17.1761	16.9284
FBgn0017424	0.774735	3.76562	0	0	0	2.30031	0.071382	0.72991	NA	CR11538	3L	-	12129103	12131488	2386	lincRNA	NA	1	3	0	0	0	2	0.0215187	0.0803463	0	0	0	0.046722
FBgn0017429	320.74	266.104	339.744	336.223	245.626	293.289	0.072594	0.7705	0.99972	CG5989	3L	-	8602411	8604149	1567	protein_coding	NA	414	212	346	436	213	255	13.6784	8.71766	13.3148	16.5537	7.78396	9.14641
FBgn0017430	213.827	163.177	176.745	349.333	129.156	159.871	-0.15676	0.64147	0.99972	Nelf-E	3L	-	8599442	8600879	1227	protein_coding	NA	276	130	180	453	112	139	11.5492	6.77039	8.77277	21.7828	5.18377	6.3144
FBgn0017448	372.647	187.026	224.859	276.844	91.1008	80.5107	0.53801	0.14334	0.99972	CG2187	3R	-	31755356	31758637	2580	protein_coding	NA	481	149	229	359	79	70	10.7329	4.13794	5.95152	9.20531	1.94977	1.69568
FBgn0017456	23.242	23.8489	12.7649	7.71154	18.4508	51.7569	-0.18563	0.63483	0.99972	Ubc84D	3R	-	7518820	7519456	637	protein_coding	NA	30	19	13	10	16	45	2.41807	1.90603	1.22043	0.926235	1.42644	3.93763
FBgn0017457	661.624	458.15	629.41	1020.24	412.837	515.269	-0.12231	0.70455	0.99972	U2af38	2L	-	292959	294681	1655	protein_coding	NA	854	365	641	1323	358	448	30.0737	15.9974	26.2911	53.5381	13.9443	17.127
FBgn0017482	119.309	184.515	110.957	99.4789	146.453	149.52	0.055547	0.85457	0.99972	T3dh	2R	-	22329726	22332072	1959	protein_coding	NA	154	147	113	129	127	130	4.0362	4.7951	3.44948	3.88522	3.68164	3.69888
FBgn0017545	22662.5	29125.8	27796.2	20002.2	24551.1	27505.9	0.12922	0.57879	0.99972	RpS3A	4	-	65225	67207	1349	protein_coding	NA	29252	23204	28308	25938	21290	23915	1446.92	1428.5	1630.88	1474.35	1164.8	1284.21
FBgn0017550	1151.26	792.035	1090.91	1452.85	919.08	981.081	-0.12394	0.64858	0.99972	Rga	3R	-	5607275	5613112	2902	protein_coding	NA	1486	631	1111	1884	797	853	27.8049	14.6947	24.2125	40.5096	16.4948	17.3271
FBgn0017551	464.066	203.343	434.008	946.977	217.95	315.142	-0.27475	0.46298	0.99972	Rca1	2L	+	6852315	6853866	1552	protein_coding	NA	599	162	442	1228	189	274	19.8163	6.67019	17.031	46.6839	6.91579	9.84058
FBgn0017558	6083.99	8850.45	7166.05	3657.58	6702.25	6030.25	0.36528	0.19438	0.99972	Pdk	2R	+	9426439	9434638	3164	protein_coding	NA	7853	7051	7298	4743	5812	5243	168.987	188.84	182.912	117.285	138.333	122.482
FBgn0017561	1437.13	1115.88	1218.56	1367.26	1154.33	1809.19	-0.17515	0.49009	0.99972	Ork1	X	-	10878054	10891250	4482	protein_coding	NA	1855	889	1241	1773	1001	1573	23.0611	13.7552	17.9693	25.3291	13.7644	21.2295
FBgn0017566	3129.93	4147.2	3288.45	2424.51	3355.74	3438.96	0.17478	0.47747	0.99972	ND75	X	-	8248651	8251687	2634	protein_coding	NA	4040	3304	3349	3144	2910	2990	81.1218	82.5704	78.3237	72.5458	64.63	65.1782
FBgn0017567	981.589	1233.87	976.028	879.116	974.433	1097.25	0.10235	0.65358	0.99972	ND23	3R	-	15836048	15837117	819	protein_coding	NA	1267	983	994	1140	845	954	79.4291	76.6981	72.5791	82.1262	58.5929	64.9271
FBgn0017572	923.484	963.998	961.299	925.385	1158.94	1002.93	-0.10643	0.61497	0.99972	Mo25	3L	-	16613218	16615472	2255	protein_coding	NA	1192	768	979	1200	1005	872	29.4664	23.6287	28.1874	34.0883	27.479	23.4014
FBgn0017577	1303.1	562.332	1288.28	2514.73	439.36	1006.38	-0.20588	0.58619	0.99972	Mcm5	3R	+	10788524	10791150	2452	protein_coding	NA	1682	448	1312	3261	381	875	35.2202	11.6754	31.998	78.4677	8.82422	19.8907
FBgn0017578	197.557	240.999	274.937	229.804	232.941	247.283	0.0053214	0.98275	0.99972	Max	3L	-	19262232	19264184	1289	protein_coding	NA	255	192	280	298	202	215	12.6499	11.8543	16.1781	16.9878	11.0837	11.5787
FBgn0017579	19832.4	25062.7	23332.4	13652.5	22421.2	23656.4	0.16601	0.53427	0.99972	RpL14	3L	+	8601006	8602392	619	protein_coding	NA	25599	19967	23762	17704	19443	20568	2123.34	2061.28	2295.63	1687.49	1783.79	1852.09
FBgn0017581	16060.3	20611.7	18789	13859.2	20860.9	19381.2	0.031835	0.89699	0.99972	Lk6	3R	-	11750931	11764457	6807	protein_coding	NA	20730	16421	19135	17972	18090	16851	199.691	196.873	214.689	198.944	192.745	176.222
FBgn0017590	30.9894	22.5937	42.2225	5.39808	65.731	50.6068	-0.1638	0.67512	0.99972	klg	3R	+	22899284	22961731	4052	protein_coding	NA	40	18	43	7	57	44	0.506848	0.283869	0.634612	0.101927	0.798872	0.605264
FBgn0019624	4137.08	5848	4678.84	3249.64	4775.3	5199.84	0.1296	0.62264	0.99972	CoVa	3R	+	11819359	11820299	796	protein_coding	NA	5340	4659	4765	4214	4141	4521	397.932	432.104	413.573	360.858	341.317	365.744
FBgn0019637	675.569	552.29	741.349	857.524	456.657	614.182	0.024973	0.92936	0.99972	Atu	3R	+	5613358	5615939	2351	protein_coding	NA	872	440	755	1112	396	534	19.0437	11.9596	19.2045	27.907	9.56565	12.6605
FBgn0019643	260.311	318.822	350.545	172.739	422.062	300.19	0.045048	0.88627	0.99972	Dat	2R	+	24139563	24157762	1887	protein_coding	NA	336	254	357	224	366	261	12.0471	11.3346	14.9085	9.22923	14.5148	10.1592
FBgn0019644	3109.79	4989.44	3796.1	2486.97	3386.87	3916.27	0.2414	0.37468	0.99972	ATPsyn-b	3L	+	9729999	9731224	918	protein_coding	NA	4014	3975	3866	3225	2937	3405	224.503	276.7	251.842	207.275	181.691	206.746
FBgn0019650	0.774735	5.02082	0	0.771154	3.45953	2.30031	-0.032576	0.90936	0.99972	toy	4	+	989725	1007922	3921	protein_coding	NA	1	4	0	1	3	2	0.0166754	0.0830166	0	0.0191624	0.0553329	0.0362061
FBgn0019660	0	1.25521	0	0	0	2.30031	-0.035117	0.81315	NA	roX2	X	+	11579065	11580432	1368	lincRNA	NA	0	1	0	0	0	2	0	0.0871788	0	0	0	0.152085
FBgn0019661	99.9408	121.755	115.866	79.4289	74.9564	57.5077	0.56234	0.046714	0.86036	roX1	X	-	3857230	3862697	5468	lincRNA	NA	129	97	118	103	65	50	1.63499	1.53012	1.74192	1.50015	0.911219	0.68797
FBgn0019662	536.891	544.759	509.616	498.166	559.29	532.521	0.0015004	0.99424	0.99972	qm	3L	+	7348313	7353622	2543	protein_coding	NA	693	434	519	646	485	463	15.284	11.913	13.3319	16.3723	11.8312	11.0856
FBgn0019686	2028.26	951.446	1993.3	3123.95	612.336	1411.24	-0.032575	0.93027	0.99972	lok	2L	+	20061422	20064381	2439	protein_coding	NA	2618	758	2030	4051	531	1227	61.0435	21.9972	55.13	108.544	13.6946	31.0591
FBgn0019828	3.09894	7.53123	1.96384	3.85577	3.45953	2.30031	0.10435	0.77145	0.99972	dj	3R	+	7059315	7060524	1210	protein_coding	NA	4	6	2	5	3	2	0.176439	0.329392	0.102751	0.253441	0.146366	0.095772
FBgn0019830	1897.33	2519.2	1946.16	1290.14	1659.42	2059.92	0.30186	0.24344	0.99972	colt	2L	-	2768590	2770069	1480	protein_coding	NA	2449	2007	1982	1673	1439	1791	85.8298	87.5436	80.9049	67.3781	55.7821	68.1427
FBgn0019886	1973.25	1789.92	1683.01	1796.79	2125.3	1993.22	-0.10974	0.5972	0.99972	Letm1	2R	-	24509508	24515320	4099	protein_coding	NA	2547	1426	1714	2330	1843	1733	34.2874	23.8921	26.8744	36.0442	27.442	25.3268
FBgn0019890	1740.05	2004.56	1666.32	1495.27	2399.76	1905.8	-0.088535	0.72383	0.99972	Smg5	2L	-	13898828	13904661	5096	protein_coding	NA	2246	1597	1697	1939	2081	1657	26.7497	23.6724	23.5403	26.5375	27.4136	21.4243
FBgn0019925	1850.84	2142.64	1825.39	1799.87	1933.87	2033.47	0.011815	0.9541	0.99972	Surf4	3R	-	15343653	15346176	1641	protein_coding	NA	2389	1707	1859	2334	1677	1768	74.7471	66.4722	67.7454	83.9176	58.0358	60.0531
FBgn0019928	6.97261	0	0	47.0404	11.5318	13.8018	-0.84516	NA	NA	Ser8	2R	+	13434207	13435045	839	protein_coding	NA	9	0	0	61	10	12	0.550766	0	0	4.28972	0.676877	0.797225
FBgn0019929	875.45	1546.41	1121.35	925.385	2065.34	2655.7	-0.5099	0.12741	0.99972	Ser7	X	+	9865233	9867070	1413	protein_coding	NA	1130	1232	1142	1200	1791	2309	41.0604	55.7164	48.3318	50.1072	71.9822	91.0843
FBgn0019932	637.607	736.806	695.199	599.958	1009.03	1192.71	-0.36888	0.19176	0.99972	SamDC	2L	+	10339457	10341503	1224	protein_coding	NA	823	587	708	778	875	1037	34.5227	30.6458	34.5908	37.5024	40.5974	47.2236
FBgn0019936	9781.03	13981.7	12104.1	8348.52	12245.6	13918	0.048076	0.85707	0.99972	RpS20	3R	+	20822181	20823356	564	protein_coding	NA	12625	11139	12327	10826	10619	12101	1149.32	1262.07	1307.04	1132.53	1069.24	1195.92
FBgn0019938	845.236	617.561	737.421	777.324	480.874	693.543	0.14985	0.57221	0.99972	RpI1	2R	-	14595611	14601216	5078	protein_coding	NA	1091	492	751	1008	417	603	11.0311	6.19138	8.84415	11.7119	4.66353	6.61891
FBgn0019947	715.08	838.477	683.416	773.468	879.873	826.96	-0.13688	0.52591	0.99972	Psn	3L	+	20432468	20435156	2048	protein_coding	NA	923	668	696	1003	763	719	25.0875	22.5974	22.0336	31.3278	22.9385	21.2158
FBgn0019948	1444.11	2238.03	1506.26	1229.22	2370.93	2240.5	-0.14042	0.63855	0.99972	Phm	2R	-	23985175	23988455	1603	protein_coding	NA	1864	1783	1534	1594	2056	1948	62.9222	74.9095	60.3122	61.8329	76.7654	71.3874
FBgn0019949	261.086	237.234	274.937	377.094	208.725	278.337	-0.13823	0.61914	0.99972	Cdk9	2R	-	22636063	22637727	1476	protein_coding	NA	337	189	280	489	181	242	11.7228	8.18258	11.3444	19.5471	6.96409	9.13883
FBgn0019952	1057.51	1242.65	1056.55	457.295	917.927	1232.96	0.2896	0.35956	0.99972	Orct	3R	+	24276260	24278792	2533	protein_coding	NA	1365	990	1076	593	796	1072	29.8994	26.9894	27.4513	14.9265	19.2853	25.4917
FBgn0019957	1594.4	2270.67	1590.71	1412.75	1702.09	1742.48	0.1489	0.54379	0.99972	ND42	3R	+	22027709	22029393	1618	protein_coding	NA	2058	1809	1620	1832	1476	1515	71.7347	78.4785	65.769	73.381	56.9057	57.3286
FBgn0019960	2225.81	2866.89	2367.41	1979.55	2184.11	2557.94	0.1362	0.5504	0.99972	CG6455	3R	-	22019505	22023335	3000	protein_coding	NA	2873	2284	2411	2567	1894	2224	53.9146	53.3451	52.6975	55.3567	39.313	45.3086
FBgn0019968	1234.15	1794.94	1232.31	1227.68	2067.64	1648.17	-0.1829	0.508	0.99972	Khc-73	2R	-	15515778	15532259	9177	protein_coding	NA	1593	1430	1255	1592	1793	1433	10.9536	12.2378	10.0509	12.5793	13.6366	10.697
FBgn0019972	644.579	527.186	564.604	826.677	622.715	662.488	-0.25445	0.27701	0.99972	Drice	3R	+	29799658	29801584	1927	protein_coding	NA	832	420	575	1072	540	576	22.1681	13.9278	17.8441	32.8227	15.9142	16.6611
FBgn0019982	887.846	1302.9	1066.36	576.823	1054	1252.52	0.14396	0.63381	0.99972	Gs1l	2L	-	4455137	4456807	1259	protein_coding	NA	1146	1038	1086	748	914	1089	58.1996	65.6086	64.2374	43.6527	51.3413	60.0397
FBgn0019985	30.9894	8.78644	23.5661	28.5327	19.604	4.60061	0.12747	0.74419	0.99972	mGluR	4	+	936819	949441	6351	protein_coding	NA	40	7	24	37	17	4	0.543032	0.118275	0.379489	0.577219	0.25527	0.0589522
FBgn0019990	785.581	562.332	766.879	1260.07	364.403	668.239	-0.086683	0.80053	0.99972	Gcn2	3R	+	31395660	31402013	5743	protein_coding	NA	1014	448	781	1634	316	581	9.57559	5.26543	8.59015	17.7318	3.30065	5.95633
FBgn0020018	253.338	253.551	237.624	332.368	329.808	255.334	-0.27117	0.255	0.99972	Ppox	3R	-	24660197	24661851	1655	protein_coding	NA	327	202	242	431	286	222	10.1446	7.79953	8.74433	15.3653	9.81386	7.47682
FBgn0020224	1319.37	834.712	1263.73	2267.96	672.301	992.582	-0.14761	0.67144	0.99972	Cbl	3L	+	8424954	8432246	6154	protein_coding	NA	1703	665	1287	2941	583	863	22.2773	10.8267	19.6087	44.2095	8.4353	12.2556
FBgn0020235	4302.88	5878.13	4821.22	3784.05	4745.32	5249.3	0.10969	0.64881	0.99972	ATPsyn-gamma	3R	-	29747704	29749163	1460	protein_coding	NA	5554	4683	4910	4907	4115	4564	234.895	246.502	241.864	238.483	192.497	209.55
FBgn0020236	18567.3	24642.2	18199.9	9114.27	18371.2	22809.8	0.23081	0.45935	0.99972	ATPCL	2R	-	15993531	16001290	4339	protein_coding	NA	23966	19632	18535	11819	15931	19832	310.576	316.639	279.761	176.006	228.35	279.006
FBgn0020238	7719.46	8035.82	7614.78	9008.62	7368.79	7880.85	-0.050054	0.80379	0.99972	14-3-3epsilon	3R	+	18242531	18250550	3366	protein_coding	NA	9964	6402	7755	11682	6390	6852	229.618	183.618	208.15	309.359	162.876	171.421
FBgn0020248	206.854	121.755	248.426	453.439	78.4159	134.568	-0.12744	0.73852	0.99972	stet	3L	-	1475438	1489547	2550	protein_coding	NA	267	97	253	588	68	117	6.40896	2.89785	7.07325	16.2191	1.80539	3.04885
FBgn0020249	742.196	1000.4	864.089	808.941	1095.52	976.48	-0.12922	0.59091	0.99972	stck	3R	+	8356978	8359964	1583	protein_coding	NA	958	797	880	1049	950	849	35.1087	36.3526	37.5624	44.1772	38.5086	33.7778
FBgn0020251	1221.76	1321.73	1140.99	618.466	998.65	1060.44	0.40043	0.13018	0.99972	sfl	3L	+	6495680	6550104	5772	protein_coding	NA	1577	1053	1162	802	866	922	14.0718	11.6943	12.0766	8.22366	8.54712	8.93147
FBgn0020255	5103.95	3855.99	4632.69	7474.03	3492.97	4229.11	-0.13259	0.6563	0.99972	Ran	X	-	11144852	11148716	1898	protein_coding	NA	6588	3072	4718	9692	3029	3677	239.895	139.225	200.1	405.56	121.998	145.357
FBgn0020257	159.595	264.848	210.131	198.187	310.204	166.772	-0.073812	0.80971	0.99972	Ppa	2R	-	22684955	22688987	4033	protein_coding	NA	206	211	214	257	269	145	2.89537	3.69103	3.50327	4.15092	4.18191	2.21248
FBgn0020258	8.52208	23.8489	14.7288	6.16923	40.3611	27.6037	-0.31696	0.41723	0.99972	ppk	2L	-	14378218	14381172	2462	protein_coding	NA	11	19	15	8	35	24	0.229399	0.493152	0.364344	0.191718	0.807331	0.543357
FBgn0020261	922.709	557.311	838.559	1100.44	575.434	721.146	-0.039519	0.89516	0.99972	pcm	X	-	19485759	19492011	5384	protein_coding	NA	1191	444	854	1427	499	627	11.4901	5.33118	9.59604	15.8201	5.32473	6.56681
FBgn0020269	13.9452	7.53123	13.7469	10.7962	29.9826	10.3514	-0.26893	0.49092	0.99972	mspo	2R	-	14671396	14713622	3131	protein_coding	NA	18	6	14	14	26	9	0.323935	0.134389	0.293451	0.289526	0.517539	0.175834
FBgn0020270	490.407	264.848	373.129	451.125	161.445	198.977	0.34745	0.31497	0.99972	mre11	2L	+	11282090	11284335	2013	protein_coding	NA	633	211	380	585	140	173	16.1453	6.69813	11.2888	17.1464	3.94963	4.79031
FBgn0020272	205.305	185.77	221.914	186.619	122.237	175.973	0.29083	0.27836	0.99972	mst	X	+	21388977	21391533	2443	protein_coding	NA	265	148	226	242	106	153	6.27586	4.36232	6.23388	6.58592	2.77663	3.93363
FBgn0020277	10.0716	25.1041	5.89151	12.3385	31.1357	20.7028	-0.33725	0.38798	0.99972	lush	3L	-	19604398	19606090	979	protein_coding	NA	13	20	6	16	27	18	0.701121	1.34248	0.376898	0.991616	1.61064	1.05389
FBgn0020278	1065.26	1435.95	932.823	971.654	1628.28	1342.23	-0.16975	0.53997	0.99972	loco	3R	-	22619968	22639387	7671	protein_coding	NA	1375	1144	950	1260	1412	1167	18.4472	19.1022	14.8448	19.4255	20.9531	16.9971
FBgn0020279	4928.09	3913.73	4546.29	7096.16	3236.96	4248.67	-0.10196	0.73044	0.99972	lig	2R	+	8067977	8078815	6258	protein_coding	NA	6361	3118	4630	9202	2807	3694	65.0851	39.7064	55.1772	108.196	31.7675	41.0325
FBgn0020294	134.804	153.135	142.378	144.977	475.108	223.13	-0.71046	0.039725	0.80016	ko	3L	-	21075581	21131159	4710	protein_coding	NA	174	122	145	188	412	194	1.99148	1.73786	1.93294	2.47263	5.21567	2.41048
FBgn0020299	27.1157	62.7603	32.4033	46.2693	115.318	65.5587	-0.60664	0.09732	0.99972	stumps	3R	+	14577217	14608079	5462	protein_coding	NA	35	50	33	60	100	57	0.440664	0.783498	0.483922	0.86809	1.39259	0.779093
FBgn0020300	137.903	251.041	254.317	175.052	412.837	272.586	-0.32066	0.33401	0.99972	gk	3L	+	18139402	18145418	1318	protein_coding	NA	178	200	259	227	358	237	6.93412	9.69682	11.7515	10.1618	15.4255	10.0229
FBgn0020304	2083.26	2890.74	2118	1633.3	3073.21	2383.12	0.00047688	0.99865	0.99972	drongo	2L	-	833584	851071	4423	protein_coding	NA	2689	2303	2157	2118	2665	2072	43.2935	46.1481	40.4487	39.1861	47.4586	36.2157
FBgn0020305	362.576	232.213	322.069	452.668	297.519	300.19	-0.16559	0.5588	0.99972	dbe	2L	-	868673	869857	1185	protein_coding	NA	468	185	328	587	258	261	20.2775	9.97627	16.5525	29.2267	12.3644	12.2768
FBgn0020306	5111.7	3276.09	4734.81	7059.92	2493.16	3291.74	0.023359	0.94425	0.99972	dom	2R	+	21323430	21341847	13020	protein_coding	NA	6598	2610	4822	9155	2162	2862	33.924	16.7018	28.8765	54.0913	12.2952	15.975
FBgn0020307	4.64841	7.53123	8.83727	16.9654	18.4508	1.15015	-0.30285	0.42343	0.99972	dve	2R	+	22243963	22286469	4933	protein_coding	NA	6	6	9	22	16	1	0.0735934	0.091594	0.128574	0.310087	0.217066	0.0133157
FBgn0020309	2253.7	1742.22	2030.61	2039.7	1830.09	1802.29	0.080326	0.71007	0.99972	crol	2L	-	11794327	11809438	7421	protein_coding	NA	2909	1388	2068	2645	1587	1567	25.1192	14.9169	20.7986	26.2459	15.1574	14.6895
FBgn0020312	523.721	417.983	443.827	767.299	314.817	403.704	-0.081115	0.79743	0.99972	CG4050	2R	-	21123735	21128510	3572	protein_coding	NA	676	333	452	995	273	351	10.1338	6.21296	7.892	17.1405	4.52662	5.71226
FBgn0020369	1490.59	1602.9	1624.09	1806.81	1466.84	1622.87	-0.050034	0.80964	0.99972	Rpt6	X	+	21316052	21317663	1404	protein_coding	NA	1924	1277	1654	2343	1272	1411	70.3598	58.1217	70.4494	98.4614	51.4508	56.0172
FBgn0020370	2204.9	1858.96	2023.74	3130.89	1771.28	1848.3	-0.12789	0.64128	0.99972	TppII	2R	-	13152885	13159141	4813	protein_coding	NA	2846	1481	2061	4060	1536	1607	33.1122	21.4455	27.9289	54.2816	19.7665	20.2976
FBgn0020372	21.6926	42.677	16.6926	13.8808	68.0373	21.8529	-0.18947	0.62712	0.99972	TM4SF	2R	+	23878197	23880860	2433	protein_coding	NA	28	34	17	18	59	19	0.806294	1.21855	0.570173	0.595637	1.8792	0.593969
FBgn0020376	0	2.51041	0	0	0	0	0.066928	0.64315	NA	Sr-CIII	2L	+	4120343	4121627	1168	protein_coding	NA	0	2	0	0	0	0	0	0.109421	0	0	0	0
FBgn0020377	0.774735	0	0	5.39808	0	0	-0.11916	0.49872	NA	Sr-CII	2R	-	12208893	12212155	2369	protein_coding	NA	1	0	0	7	0	0	0.0232746	0	0	0.18722	0	0
FBgn0020378	40.2862	1.25521	58.9151	50.125	181.048	75.9101	-0.67556	0.08086	0.99972	Sp1	X	+	9729648	9756369	4399	protein_coding	NA	52	1	60	65	157	66	0.744319	0.0178149	1.0003	1.06916	2.48565	1.02559
FBgn0020379	344.757	232.213	243.516	355.502	204.112	226.58	0.050224	0.86508	0.99972	Rfx	3R	-	10361760	10378068	5557	protein_coding	NA	445	185	248	461	177	197	5.14477	2.66199	3.33949	6.12464	2.26342	2.47256
FBgn0020381	294.399	277.4	282.793	192.017	310.204	236.932	0.18488	0.48042	0.99972	Dredd	X	-	633622	635545	1708	protein_coding	NA	380	221	288	249	269	206	11.8533	8.5798	10.4634	8.92545	9.28099	6.97588
FBgn0020385	13542.4	25918.7	16741.7	12857.5	26149.4	43203.2	-0.40067	0.24807	0.99972	pug	3R	+	10696534	10703316	3481	protein_coding	NA	17480	20649	17050	16673	22676	37563	285.915	420.361	324.819	313.389	410.248	667.007
FBgn0020386	3056.33	2812.92	2817.13	3326.76	2588.88	2345.16	0.065431	0.77455	0.99972	Pdk1	3L	+	129450	145895	6593	protein_coding	NA	3945	2241	2869	4314	2245	2039	55.2512	39.0629	46.8001	69.4302	34.7773	31.0018
FBgn0020388	629.085	551.035	647.085	677.845	449.738	593.479	0.076153	0.75742	0.99972	Gcn5	3L	-	12521129	12524014	2770	protein_coding	NA	812	439	659	879	390	516	15.0509	10.1274	14.227	18.7228	7.9957	10.3832
FBgn0020389	1682.72	2133.85	1583.84	744.935	1295.02	1412.39	0.5443	0.055817	0.94468	Papss	3L	+	19845293	19860925	3029	protein_coding	NA	2172	1700	1613	966	1123	1228	44.5895	43.436	38.5682	22.7889	25.4999	27.3682
FBgn0020391	58.8799	48.953	35.3491	23.9058	65.731	25.3034	0.21578	0.55994	0.99972	Nrk	2R	+	13160063	13163484	3235	protein_coding	NA	76	39	36	31	57	22	1.20622	0.77038	0.665483	0.56539	1.00063	0.379062
FBgn0020392	1224.86	846.008	980.937	1545.39	631.94	904.021	-0.011426	0.97101	0.99972	Nmt	3L	-	8176135	8178429	1812	protein_coding	NA	1581	674	999	2004	548	786	44.7982	23.7693	32.9698	65.253	17.1749	24.1783
FBgn0020399	0.774735	0	0	1.54231	5.76588	0	-0.22052	0.32679	NA	Mst89B	3R	+	16267012	16268433	1287	protein_coding	NA	1	0	0	2	5	0	0.0398941	0	0	0.0916879	0.220629	0
FBgn0020407	256.437	173.218	224.859	320.029	145.3	180.574	0.013695	0.96559	0.99972	asun	3R	+	16264271	16266891	2497	protein_coding	NA	331	138	229	415	126	157	6.80607	3.53163	5.48436	9.80596	2.86565	3.50463
FBgn0020412	899.467	770.696	834.631	1251.58	625.021	694.693	-0.032197	0.91218	0.99972	JIL-1	3L	-	11078752	11093193	6634	protein_coding	NA	1161	614	850	1623	542	604	10.2723	6.76131	8.75942	16.5016	5.30418	5.80158
FBgn0020414	1688.15	2463.97	1632.93	1204.54	3245.03	2873.08	-0.26284	0.422	0.99972	Idgf3	2L	+	16450907	16455194	3954	protein_coding	NA	2179	1963	1663	1562	2814	2498	43.3635	48.6201	38.5462	35.7209	61.9407	53.9678
FBgn0020415	4962.95	8977.23	6144.85	3265.07	8016.87	8078.68	0.04074	0.90169	0.99972	Idgf2	2L	+	16447330	16450508	1796	protein_coding	NA	6406	7152	6258	4234	6952	7024	214.412	297.932	243.96	162.849	257.369	255.224
FBgn0020416	3334.46	5836.7	4131.92	1994.98	5005.93	5724.31	0.04847	0.88523	0.99972	Idgf1	2L	+	16445278	16446793	1445	protein_coding	NA	4304	4650	4208	2587	4341	4977	152.93	205.636	174.147	105.63	170.606	191.982
FBgn0020429	6.97261	1.25521	3.92768	2.31346	21.9103	4.60061	-0.35789	0.32023	0.99972	GluRIIB	2L	+	5559342	5563502	2949	protein_coding	NA	9	1	4	3	19	4	0.156695	0.0216691	0.0811137	0.0600215	0.36589	0.0756044
FBgn0020440	696.487	540.993	712.873	783.493	402.458	504.917	0.17156	0.55264	0.99972	Fak	2R	-	19430659	19437259	5619	protein_coding	NA	899	431	726	1016	349	439	9.92217	5.92042	9.33267	12.8859	4.26047	5.26001
FBgn0020443	3232.97	2566.89	2705.19	3486.39	2538.14	2879.98	-0.059741	0.79736	0.99972	Elf	2L	+	12434452	12441279	4409	protein_coding	NA	4173	2045	2755	4521	2201	2504	64.3029	39.2196	49.4454	80.0553	37.5134	41.8881
FBgn0020445	886.297	504.593	797.318	1426.64	303.285	632.584	-0.075106	0.83732	0.99972	E23	2L	-	3334875	3354829	5149	protein_coding	NA	1144	402	812	1850	263	550	12.5319	5.48083	10.3602	23.2883	3.18664	6.54078
FBgn0020493	473.363	717.977	550.857	422.593	687.292	521.02	0.08122	0.76852	0.99972	Dad	3R	+	17054007	17070408	3906	protein_coding	NA	611	572	561	548	596	453	8.50393	9.90837	9.09417	8.76461	9.17507	6.84465
FBgn0020496	3249.24	2489.07	3168.65	4235.18	2608.48	2917.94	-0.11522	0.6602	0.99972	CtBP	3R	+	13011649	13026275	5842	protein_coding	NA	4194	1983	3227	5492	2262	2537	69.9595	41.1689	62.6959	105.274	41.7346	45.9424
FBgn0020497	2253.7	1781.14	2194.59	2918.82	1514.12	1679.22	0.022744	0.93693	0.99972	emb	2L	+	8403573	8408853	4492	protein_coding	NA	2909	1419	2235	3785	1313	1460	35.5109	21.559	31.7773	53.0954	17.7283	19.3484
FBgn0020503	2800.67	3264.79	3069.48	2116.82	4460.48	3099.66	-0.069844	0.80669	0.99972	CLIP-190	2L	+	17384700	17409698	8115	protein_coding	NA	3615	2601	3126	2745	3868	2695	46.9179	42.0145	47.2543	40.9399	55.5267	37.9721
FBgn0020506	9.29682	1.25521	3.92768	3.85577	2.30635	3.45046	0.18294	0.60805	0.99972	Amyrel	2R	-	16651095	16652699	1549	protein_coding	NA	12	1	4	5	2	3	0.397756	0.0412538	0.154425	0.190449	0.0733247	0.107952
FBgn0020508	7.74735	0	7.85535	22.3635	1.15318	0	-0.10153	0.72957	0.99972	Ag5r2	X	-	14782962	14784052	849	protein_coding	NA	10	0	8	29	1	0	0.604755	0	0.563497	2.01535	0.0668905	0
FBgn0020510	880.099	749.358	794.373	1137.45	950.216	994.883	-0.31836	0.1375	0.99972	Abi	3R	-	14119262	14122420	2528	protein_coding	NA	1136	597	809	1475	824	865	24.8092	16.2269	20.5781	37.0169	19.9043	20.5081
FBgn0020513	15531.1	28277.3	20783.3	9466.69	18411.6	25501.2	0.21194	0.51908	0.99972	ade5	X	-	12757036	12760617	2550	protein_coding	NA	20047	22528	21166	12276	15966	22172	470.639	658.247	578.761	331.184	414.59	565.09
FBgn0020518	0.774735	0	1.96384	0	3.45953	0	-0.020531	0.91912	NA	snoRNA:Me28S-G764	3L	-	22869545	22869622	78	snoRNA	NA	1	0	2	0	3	0	0.658252	0	1.53336	0	2.18423	0
FBgn0020521	624.436	667.769	685.38	484.285	1446.08	861.465	-0.38569	0.2363	0.99972	pio	2R	+	24581245	24597862	3600	protein_coding	NA	806	532	698	628	1254	749	17.7838	14.6093	17.9378	15.923	30.6036	17.941
FBgn0020545	1088.5	1584.07	1384.51	1017.15	1299.63	1396.29	0.11297	0.65137	0.99972	kraken	2L	+	852768	854539	1320	protein_coding	NA	1405	1262	1410	1319	1127	1214	56.3577	63.0034	65.8746	60.7989	50.0018	52.8653
FBgn0020616	457.868	296.228	420.261	583.764	297.519	423.256	-0.12495	0.67569	0.99972	SA	2L	+	6950421	6954586	3634	protein_coding	NA	591	236	428	757	258	368	8.35006	4.14994	7.04316	12.2906	4.03187	5.64449
FBgn0020618	21237.8	26339.2	24138.5	15423.1	20969.3	22969.7	0.24384	0.31102	0.99972	Rack1	2L	-	7825347	7827315	1693	protein_coding	NA	27413	20984	24583	20000	18184	19971	1123.29	1070.17	1173.26	941.759	824.158	888.404
FBgn0020620	1140.41	1553.94	1047.71	1215.34	1544.1	1320.38	-0.11081	0.65495	0.99972	RN-tre	2R	-	13984815	13990707	5164	protein_coding	NA	1472	1238	1067	1576	1339	1148	27.8679	29.1706	23.5279	34.2868	28.039	23.5947
FBgn0020621	2213.42	2448.91	2344.82	1592.43	1529.11	1595.26	0.53344	0.0057987	0.26187	Pkn	2R	-	9252310	9285097	8540	protein_coding	NA	2857	1951	2388	2065	1326	1387	28.6726	24.3692	27.9134	23.815	14.7192	15.1115
FBgn0020622	1455.73	871.112	1076.18	1614.8	635.399	930.474	0.075745	0.81524	0.99972	Pi3K21B	2L	+	297880	305233	4938	protein_coding	NA	1879	694	1096	2094	551	809	25.8784	11.8959	17.581	33.1407	8.39359	12.0958
FBgn0020626	1461.92	1653.11	1573.03	1877.76	2307.5	2506.18	-0.46845	0.03369	0.74218	Osbp	3R	-	24934869	24938222	3248	protein_coding	NA	1887	1317	1602	2435	2001	2179	29.8293	25.911	29.4955	44.2327	34.9867	37.3941
FBgn0020633	161.92	86.6092	188.528	337.766	66.8842	152.97	-0.22441	0.55084	0.99972	Mcm7	3L	+	8891596	8894310	2451	protein_coding	NA	209	69	192	438	58	133	4.37814	1.79896	4.68454	10.5437	1.34387	3.02461
FBgn0020637	0.774735	1.25521	8.83727	0.771154	9.2254	4.60061	-0.091534	0.78058	0.99972	Lcp65Ag2	3L	-	6132990	6133593	543	protein_coding	NA	1	1	9	1	8	4	0.0945556	0.117683	0.991178	0.108658	0.836685	0.410603
FBgn0020639	1.54947	0	0	0	0	0	0.066928	0.64315	NA	Lcp65Af	3L	-	6136215	6136791	519	protein_coding	NA	2	0	0	0	0	0	0.197856	0	0	0	0	0
FBgn0020642	0	1.25521	3.92768	0	5.76588	2.30031	-0.080238	0.76077	0.99972	Lcp65Ac	3L	+	6144819	6145393	505	protein_coding	NA	0	1	4	0	5	2	0	0.126539	0.473672	0	0.562277	0.22075
FBgn0020647	826.642	1048.1	986.829	844.414	786.465	787.855	0.2215	0.30481	0.99972	KrT95D	3R	-	23997538	24031827	5938	protein_coding	NA	1067	835	1005	1095	682	685	12.1986	11.8811	13.3823	14.3857	8.62409	8.50177
FBgn0020653	4159.55	4685.68	3995.43	4812	4240.22	4881.25	-0.10929	0.59253	0.99972	Trxr-1	X	+	8242528	8248033	2790	protein_coding	NA	5369	3733	4069	6240	3677	4244	129.481	112.046	114.293	172.93	98.0821	111.112
FBgn0020655	1232.6	1147.26	1175.36	1405.04	1058.61	1272.07	-0.065603	0.76422	0.99972	ArfGAP1	3L	-	12415026	12417580	2085	protein_coding	NA	1591	914	1197	1822	918	1106	39.7507	28.4216	34.833	52.3115	25.369	29.9989
FBgn0020660	242.492	193.302	325.997	165.027	124.543	128.817	0.72741	0.010546	0.37209	eIF-4B	3L	-	27842669	27858271	1922	protein_coding	NA	313	154	332	214	108	112	10.4151	6.37778	12.8671	8.18292	3.97493	4.04589
FBgn0020762	1568.06	1965.65	1599.55	646.227	1614.45	1489.45	0.36119	0.25096	0.99972	Atet	2L	+	4333913	4345776	5244	protein_coding	NA	2024	1566	1629	838	1400	1295	24.7663	23.8491	23.2164	11.7834	18.948	17.2027
FBgn0020764	1904.3	3689.05	2937.9	2042.02	7464.5	5773.77	-0.60118	0.088307	0.99972	Alas	2R	+	23964772	23966757	1842	protein_coding	NA	2458	2939	2992	2648	6473	5020	68.514	101.959	97.1362	84.8182	199.567	151.906
FBgn0020765	22.4673	92.8852	20.6203	19.2789	51.8929	20.7028	0.29249	0.45375	0.99972	Acp65Aa	3L	-	6152050	6152745	615	protein_coding	NA	29	74	21	25	45	18	2.42108	7.68903	2.04199	2.39842	4.15537	1.63139
FBgn0020766	302.147	360.244	301.449	269.904	355.178	377.25	-0.049464	0.84203	0.99972	Aats-phe	2R	+	13968308	13969902	1526	protein_coding	NA	390	287	307	350	308	328	13.1219	12.0183	12.0308	13.5324	11.4622	11.9807
FBgn0020767	601.969	656.472	643.157	727.97	633.093	568.176	-0.020173	0.9269	0.99972	Spred	2R	-	14759646	14769423	4167	protein_coding	NA	777	523	655	944	549	494	12.803	10.7255	12.5705	17.8746	10.0057	8.83672
FBgn0020880	3.09894	3.76562	3.92768	6.16923	8.07223	4.60061	-0.30825	0.41757	0.99972	CG7179	2L	-	7775804	7778029	2226	protein_coding	NA	4	3	4	8	7	4	0.0922618	0.0861214	0.107459	0.212044	0.178585	0.100161
FBgn0020887	1039.69	751.868	868.017	1430.49	651.544	705.044	-0.054651	0.86077	0.99972	Su(z)12	3L	-	19918242	19923462	4098	protein_coding	NA	1342	599	884	1855	565	613	17.1529	9.52884	13.1601	27.246	7.98764	8.5059
FBgn0020906	68.1767	3.76562	1814.59	3986.1	0	4.60061	-0.061655	NA	NA	Jon25Bi	2L	-	4954279	4955144	866	protein_coding	NA	88	3	1848	5169	0	4	5.21737	0.22137	127.612	352.168	0	0.257456
FBgn0020907	337.784	124.265	117.83	118.758	132.615	40.2554	0.63266	0.092086	0.99972	Scp2	3R	-	16574543	16583663	1283	protein_coding	NA	436	99	120	154	115	35	17.448	4.93087	5.59324	7.08198	5.0903	1.52056
FBgn0020908	3.09894	8.78644	14.7288	9.25385	11.5318	11.5015	-0.13338	0.73225	0.99972	Scp1	2R	-	2932595	2968052	1226	protein_coding	NA	4	7	15	12	10	10	0.188244	0.410004	0.822196	0.648959	0.520532	0.510901
FBgn0020909	223.124	207.109	216.022	240.6	221.41	234.631	-0.098048	0.66555	0.99972	Rtc1	X	+	13757179	13758598	1301	protein_coding	NA	288	165	220	312	192	204	11.3659	8.10441	10.1124	14.1494	8.381	8.74006
FBgn0020910	29567	42655.6	37938.4	22142.9	32883.9	38760.2	0.19916	0.46563	0.99972	RpL3	3R	+	11221894	11225173	2231	protein_coding	NA	38164	33983	38637	28714	28516	33700	1452.54	1609.77	1712.78	1255.86	1200.46	1392.45
FBgn0020912	32.5389	16.3177	10.8011	16.9654	1.15318	13.8018	0.37638	0.32975	0.99972	Ptx1	3R	+	30912754	30930682	3571	protein_coding	NA	42	13	11	22	1	12	0.672415	0.259035	0.205118	0.404748	0.0177081	0.208566
FBgn0020930	323.839	276.145	346.617	355.502	392.08	299.04	-0.12866	0.59331	0.99972	Dgkepsilon	2R	+	12757546	12759724	2010	protein_coding	NA	418	220	353	461	340	260	10.9053	7.14352	10.7265	13.8209	9.81128	7.36393
FBgn0021738	0.774735	0	0	0	0	1.15015	-0.0011701	0.99354	NA	Crg-1	X	+	3793223	3797339	1230	protein_coding	NA	1	0	0	0	0	1	0.0417428	0	0	0	0	0.0453165
FBgn0021742	3.09894	0	5.89151	0.771154	1.15318	2.30031	0.19581	0.51259	0.99972	C901	X	-	10964032	10967134	1924	protein_coding	NA	4	0	6	1	1	2	0.106744	0	0.18649	0.0306659	0.0295166	0.0579411
FBgn0021750	197.557	158.156	215.04	272.217	129.156	178.274	-0.020022	0.94806	0.99972	Aats-ser	3R	+	15340667	15343218	2552	protein_coding	NA	255	126	219	353	112	155	6.49436	3.99388	6.49625	10.3311	3.155	4.28551
FBgn0021760	2193.27	2172.76	1937.33	2344.31	1764.36	1595.26	0.12896	0.58684	0.99972	chb	3L	+	21172853	21183278	6205	protein_coding	NA	2831	1731	1973	3040	1530	1387	26.3179	20.028	21.3629	32.4758	15.7322	13.9979
FBgn0021761	1240.35	704.17	1015.3	2294.96	582.353	998.333	-0.27302	0.44529	0.99972	Nup154	2L	+	11004820	11010921	5420	protein_coding	NA	1601	561	1034	2976	505	868	17.1217	7.467	12.8795	36.5731	5.97354	10.0774
FBgn0021764	1299.23	970.274	1242.13	1864.65	779.546	895.97	-0.0096576	0.97575	0.99972	sdk	X	+	686834	749496	9565	protein_coding	NA	1677	773	1265	2418	676	779	9.62156	5.51976	8.45328	15.942	4.28987	4.85204
FBgn0021765	3322.06	4779.82	3833.41	3445.52	4166.42	4590.26	-0.028528	0.90638	0.99972	scu	X	+	18091259	18092853	1134	protein_coding	NA	4288	3808	3904	4468	3613	3991	203.101	224.483	215.372	243.189	189.283	205.217
FBgn0021767	8.52208	12.5521	9.81919	3.85577	4.6127	1.15015	0.66885	0.082677	0.99972	org-1	X	-	8447691	8455069	3417	protein_coding	NA	11	10	10	5	4	1	0.174207	0.197107	0.184457	0.090995	0.0700679	0.0171929
FBgn0021768	761.564	627.603	832.667	973.197	650.391	694.693	-0.054223	0.83258	0.99972	nudC	3L	+	16804994	16819532	1622	protein_coding	NA	983	500	848	1262	564	604	35.2943	22.3434	35.4625	52.0696	22.3983	23.543
FBgn0021776	12.3958	15.0625	3.92768	24.6769	5.76588	4.60061	-0.076176	0.84225	0.99972	mira	3R	-	19931799	19935120	3322	protein_coding	NA	16	12	4	32	5	4	0.271122	0.253077	0.0789453	0.623115	0.0937129	0.0735833
FBgn0021795	1964.73	2819.19	2167.1	1401.96	1950.02	2078.33	0.3119	0.22682	0.99972	Tapdelta	2R	-	11370300	11371335	977	protein_coding	NA	2536	2246	2207	1818	1691	1807	146.136	161.082	148.127	120.386	107.78	113.043
FBgn0021796	855.307	906.258	881.763	862.922	738.032	663.639	0.20316	0.35193	0.99972	Tor	2L	+	13004480	13013197	7987	protein_coding	NA	1104	722	898	1119	640	577	7.09785	5.77727	6.72444	8.26726	4.55116	4.02725
FBgn0021800	810.373	566.098	690.289	955.46	483.18	550.924	0.044708	0.88065	0.99972	Reph	2L	+	3803545	3810671	4890	protein_coding	NA	1046	451	703	1239	419	479	16.0843	8.63128	12.5906	21.8935	7.12639	7.99615
FBgn0021814	401.313	660.238	429.099	347.019	620.408	445.109	0.063839	0.82991	0.99972	Vps28	2R	-	8078869	8080041	1173	protein_coding	NA	518	526	437	450	538	387	26.8918	33.9863	26.4237	26.8458	30.8928	21.811
FBgn0021818	895.594	661.493	864.089	1320.22	576.588	729.197	-0.094858	0.75919	0.99972	cnk	2R	-	17413970	17420007	5816	protein_coding	NA	1156	527	880	1712	500	634	10.5856	6.00613	9.38558	18.015	5.06421	6.30261
FBgn0021825	583.375	717.977	526.309	804.314	696.518	713.095	-0.25097	0.27873	0.99972	Dmn	2R	+	8891832	8893339	1358	protein_coding	NA	753	572	536	1043	604	620	28.4696	26.916	23.6034	45.3153	25.2586	25.448
FBgn0021847	494.281	508.358	489.978	654.71	430.134	469.263	-0.053124	0.83114	0.99972	l(2)k14710	2R	-	6209782	6214122	3079	protein_coding	NA	638	405	499	849	373	408	10.691	8.44658	9.73914	16.3486	6.9134	7.42221
FBgn0021856	272.707	287.442	245.48	313.089	294.06	301.34	-0.15878	0.47773	0.99972	l(2)k14505	2L	+	21261168	21262411	1055	protein_coding	NA	352	229	250	406	255	262	18.2004	14.7367	15.0557	24.1233	14.5835	14.7066
FBgn0021872	6616.24	10345.4	7340.83	4734.12	10538.9	10249	-0.056492	0.85663	0.99972	Xbp1	2R	+	21143545	21145750	2142	protein_coding	NA	8540	8242	7476	6139	9139	8911	205.953	247.384	209.992	170.131	243.778	233.299
FBgn0021874	151.848	124.265	130.595	126.469	133.768	146.069	0.0050199	0.98429	0.99972	Nle	2L	-	566366	568121	1584	protein_coding	NA	196	99	133	164	116	127	6.35313	3.99388	5.02118	6.10871	4.15886	4.469
FBgn0021875	192.134	249.786	227.805	184.306	191.427	193.226	0.20819	0.38944	0.99972	Zfrp8	2R	+	24133989	24135405	1306	protein_coding	NA	248	199	232	239	166	168	10.6287	10.6148	11.5808	11.7707	7.86907	7.81653
FBgn0021895	835.164	824.67	834.631	1068.82	1203.91	1163.96	-0.42965	0.031032	0.70873	ytr	2R	-	23847161	23851480	2209	protein_coding	NA	1078	657	850	1386	1044	1012	26.6997	20.2526	24.5205	39.448	28.6005	27.2109
FBgn0021906	2877.37	3906.2	2787.67	2067.46	3319.99	3275.64	0.12395	0.64634	0.99972	RFeSP	2L	-	1612429	1614160	1118	protein_coding	NA	3714	3112	2839	2681	2879	2848	192.617	200.872	171.49	159.78	165.15	160.349
FBgn0021944	550.837	529.697	571.477	789.662	395.539	583.128	-0.084176	0.76489	0.99972	Coprox	2L	+	6964421	6965887	1467	protein_coding	NA	711	422	582	1024	343	507	25.5282	18.8578	24.3386	42.2498	13.6217	19.7621
FBgn0021967	1454.18	2148.91	1585.8	953.147	1546.41	1471.05	0.33083	0.2272	0.99972	Pdsw	2L	+	3466157	3467334	738	protein_coding	NA	1877	1712	1615	1236	1341	1279	138.665	157.411	138.962	104.929	109.576	102.576
FBgn0021979	2682.13	3218.35	2955.58	2036.62	2415.9	2392.32	0.34232	0.10449	0.99972	l(2)k09913	2R	+	23067196	23071875	2411	protein_coding	NA	3462	2564	3010	2641	2095	2080	113.652	104.76	115.09	99.6305	76.071	74.129
FBgn0021995	594.996	519.655	602.898	1058.02	498.172	614.182	-0.27964	0.3455	0.99972	Rs1	2R	+	8163564	8167769	2731	protein_coding	NA	768	414	614	1372	432	534	15.172	10.1791	14.1277	31.1464	9.43951	11.4524
FBgn0022023	3057.1	3606.2	3485.81	2668.97	3574.84	3809.31	0.012458	0.95748	0.99972	eIF-3p40	2L	-	5051193	5053094	1496	protein_coding	NA	3946	2873	3550	3461	3100	3312	151.309	137.11	158.547	152.504	131.478	137.871
FBgn0022027	187.486	215.895	228.787	243.685	235.248	300.19	-0.26844	0.27435	0.99972	Vps25	2R	+	8625451	8626180	678	protein_coding	NA	242	172	233	316	204	261	18.3262	16.2111	20.5511	27.4991	17.0873	21.4572
FBgn0022029	477.237	297.484	427.135	654.71	343.646	402.554	-0.18093	0.54929	0.99972	l(2)k01209	2R	+	17420407	17425679	3254	protein_coding	NA	616	237	435	849	298	350	12.9093	6.18155	10.6177	20.4457	6.90752	7.96276
FBgn0022069	796.427	593.712	829.722	1313.28	409.377	560.125	-0.030383	0.92955	0.99972	Nnp-1	2L	-	13363308	13366189	2882	protein_coding	NA	1028	473	845	1703	355	487	18.3141	10.4877	17.5336	34.8643	6.9953	9.41882
FBgn0022097	1326.35	1164.83	1205.8	1493.73	1898.13	1553.86	-0.38377	0.077858	0.99972	Vha36-1	2R	+	15541435	15542498	1064	protein_coding	NA	1712	928	1228	1937	1646	1351	82.6131	55.7341	69.0185	107.411	87.8537	70.7743
FBgn0022153	1136.54	916.3	969.154	1088.87	799.15	1017.89	0.050866	0.82843	0.99972	l(2)k05819	2L	+	4394196	4400487	5246	protein_coding	NA	1467	730	987	1412	693	885	15.1827	9.40304	11.8975	16.7929	7.93297	9.94342
FBgn0022160	1883.38	2770.24	1729.16	674.76	1764.36	1727.53	0.47222	0.15287	0.99972	Gpo-1	2R	-	15857752	15862755	2929	protein_coding	NA	2431	2207	1761	875	1530	1502	49.9866	56.4805	42.1745	20.6752	34.7972	33.5284
FBgn0022213	1987.97	1178.64	1580.89	3204.15	797.997	1433.09	-0.1377	0.69938	0.99972	Cas	2L	-	16821156	16825207	3237	protein_coding	NA	2566	939	1610	4155	692	1246	40.7006	18.5369	29.7435	75.7337	12.1405	21.4554
FBgn0022224	156.496	274.89	219.95	228.262	236.401	279.487	-0.16587	0.55221	0.99972	ubl	2R	-	6810011	6810530	396	protein_coding	NA	202	219	224	296	205	243	26.1905	35.3398	33.8269	44.1019	29.3989	34.2037
FBgn0022238	1698.99	1449.76	1554.38	2233.26	1634.05	1648.17	-0.20743	0.37303	0.99972	lolal	2R	-	18154095	18158192	2402	protein_coding	NA	2193	1155	1583	2896	1417	1433	97.7402	64.0685	82.1746	148.322	69.8537	69.3355
FBgn0022246	96.0671	76.5675	89.3546	92.5385	109.552	85.1114	-0.10884	0.69571	0.99972	Rpp30	2L	-	251039	252373	1105	protein_coding	NA	124	61	91	120	95	74	6.10414	3.73732	5.21754	6.78825	5.17263	3.95466
FBgn0022288	626.761	512.124	585.224	741.079	341.34	501.467	0.10035	0.73419	0.99972	l(2)09851	2R	+	5754517	5756327	1811	protein_coding	NA	809	408	596	961	296	436	24.813	15.5747	21.2912	33.871	10.0417	14.5175
FBgn0022338	1067.58	440.577	928.896	1844.6	439.36	768.303	-0.21543	0.55987	0.99972	dnk	3R	+	18980995	18982749	1393	protein_coding	NA	1378	351	946	2392	381	668	59.2559	18.7853	47.3801	118.2	18.1214	31.1841
FBgn0022343	1236.48	1134.71	1173.39	1503.75	999.803	1197.31	-0.056247	0.81314	0.99972	CG3760	2R	+	24938181	24939769	1258	protein_coding	NA	1596	904	1195	1950	867	1041	73.3612	51.7166	63.977	103.001	44.0796	51.9469
FBgn0022344	468.715	464.426	522.381	423.364	484.334	541.722	0.0065626	0.97675	0.99972	CG10340	3R	-	16613398	16614391	938	protein_coding	NA	605	370	532	549	420	471	33.1161	25.2066	33.917	34.5327	25.4284	27.9885
FBgn0022349	1773.37	1734.69	1771.38	1924.8	1356.13	1572.26	0.10984	0.62736	0.99972	CG1910	3R	+	31747643	31751894	3199	protein_coding	NA	2289	1382	1804	2496	1176	1367	42.2754	31.7671	38.8062	52.9737	24.0234	27.4085
FBgn0022355	63464.7	114786	54976.7	92863.2	220977	328425	-1.0373	0.0034109	0.18165	Tsf1	X	+	18387084	18390344	2854	protein_coding	NA	81918	91448	55989	120421	191625	285549	1726.59	2398.9	1374.47	2916.66	4467.32	6533.79
FBgn0022359	174.315	320.077	272.974	102.564	269.843	343.896	0.071885	0.83837	0.99972	Sodh-2	3R	+	10876384	10878257	1346	protein_coding	NA	225	255	278	133	234	299	8.58271	12.1063	12.3512	5.82998	9.87285	12.3819
FBgn0022361	857.632	942.659	779.644	621.55	1305.39	1068.49	-0.17953	0.53525	0.99972	Pur-alpha	4	+	558016	567257	2953	protein_coding	NA	1107	751	794	806	1132	929	30.8564	26.0534	25.7774	25.817	34.9003	28.1117
FBgn0022382	1194.64	1149.77	1087.97	970.883	1094.36	688.942	0.28148	0.25591	0.99972	Pka-R2	2R	-	9993890	10026042	4855	protein_coding	NA	1542	916	1108	1259	949	599	31.7322	23.4606	26.557	29.7725	21.6007	13.3819
FBgn0022699	318.416	254.807	307.341	500.479	192.58	299.04	-0.13668	0.66953	0.99972	D19B	3L	-	6182176	6184920	2685	protein_coding	NA	411	203	313	649	167	260	7.85931	4.83133	6.97122	14.2614	3.53219	5.39748
FBgn0022700	51.9072	27.6145	33.3853	54.752	115.318	26.4535	-0.48999	0.1965	0.99972	Cht4	2R	-	21065379	21067087	1473	protein_coding	NA	67	22	34	71	100	23	2.33539	0.95441	1.38034	2.84391	3.8554	0.870336
FBgn0022702	439.275	243.51	385.894	539.808	141.841	295.589	0.090267	0.80014	0.99972	Cht2	3L	-	1752328	1755934	3038	protein_coding	NA	567	194	393	700	123	257	13.9826	5.95437	11.2881	19.8371	3.35503	6.88041
FBgn0022709	690.289	1266.5	981.919	696.352	1687.1	1679.22	-0.35911	0.27599	0.99972	Adk1	3L	-	12200322	12204082	1266	protein_coding	NA	891	1009	1000	903	1463	1460	41.0289	57.8271	53.6333	47.783	74.5146	72.986
FBgn0022710	618.238	540.993	520.417	433.389	695.365	673.99	-0.087433	0.73806	0.99972	Ac13E	X	-	15510877	15554278	8129	protein_coding	NA	798	431	530	562	603	586	5.76424	3.87476	4.459	4.66498	4.81772	4.59528
FBgn0022720	1118.72	667.769	980.937	1558.5	631.94	837.312	-0.10124	0.75505	0.99972	zf30C	2L	+	9758342	9762375	2976	protein_coding	NA	1444	532	999	2021	548	728	24.9127	11.4234	20.0744	40.0677	10.4573	13.6352
FBgn0022724	211.503	187.026	247.444	458.066	174.129	184.025	-0.2548	0.45224	0.99972	Taf8	X	+	18101970	18103482	1341	protein_coding	NA	273	149	252	594	151	160	10.4525	7.10023	11.2378	26.1347	6.3947	6.65048
FBgn0022740	2.3242	7.53123	0.981919	3.08462	2.30635	2.30031	0.11181	0.74264	0.99972	HLH54F	2R	+	17757405	17760517	1078	protein_coding	NA	3	6	1	4	2	2	0.142886	0.35567	0.0554741	0.218928	0.105362	0.103412
FBgn0022764	4127.79	2585.72	3650.78	5427.38	1992.69	2716.66	0.024515	0.94072	0.99972	Sin3A	2R	-	12575240	12592917	9421	protein_coding	NA	5328	2060	3718	7038	1728	2362	34.0459	16.3831	27.6715	51.6802	12.2132	16.3853
FBgn0022768	1464.25	1053.12	1615.26	1894.73	883.332	882.168	0.13833	0.66281	0.99972	Pp2C1	X	-	4679988	4686903	5675	protein_coding	NA	1890	839	1645	2457	766	767	17.7501	9.80681	17.9939	26.5165	7.95704	7.82002
FBgn0022770	13.9452	42.677	33.3853	17.7365	55.3524	34.5046	-0.15427	0.68786	0.99972	Peritrophin-A	X	+	20244647	20248203	1516	protein_coding	NA	18	34	34	23	48	30	0.694355	1.63236	1.5276	1.01955	2.04802	1.25633
FBgn0022772	991.661	519.655	1021.2	2067.46	471.649	812.008	-0.27074	0.46151	0.99972	Orc1	2R	-	7522437	7525716	3152	protein_coding	NA	1280	414	1040	2681	409	706	20.8502	8.39323	19.7313	50.1847	7.36901	12.4848
FBgn0022774	3619.56	6076.45	3792.17	1269.32	3262.33	3488.42	0.56772	0.090373	0.99972	Oat	3L	-	19647280	19649851	1501	protein_coding	NA	4672	4841	3862	1646	2829	3033	159.812	206.096	153.865	64.7008	107.035	112.63
FBgn0022786	499.704	264.848	471.321	761.129	232.941	403.704	-0.12849	0.71393	0.99972	Hira	X	+	7722119	7725917	3420	protein_coding	NA	645	211	480	987	202	351	9.68324	3.9425	8.39313	17.0275	3.35426	5.72061
FBgn0022787	2653.47	5236.72	2835.78	2941.95	6766.83	4123.3	-0.28252	0.39054	0.99972	Hel89B	3R	+	15973298	15983451	6581	protein_coding	NA	3425	4172	2888	3815	5868	3585	28.0555	42.5334	27.5535	35.9109	53.1659	31.8803
FBgn0022800	89.8692	173.218	152.197	78.6577	202.959	146.069	-0.030939	0.92816	0.99972	Cad96Ca	3R	-	25197571	25208283	2939	protein_coding	NA	116	138	155	102	176	127	2.02649	3.0005	3.15385	2.04768	3.40083	2.40861
FBgn0022893	7507.96	4031.72	6888.16	14655	4422.43	6162.52	-0.32592	0.35405	0.99972	Df31	2L	-	21626309	21629932	2083	protein_coding	NA	9691	3212	7015	19004	3835	5358	296.173	122.175	249.705	667.416	129.637	177.769
FBgn0022935	461.742	333.885	468.375	587.62	317.123	391.052	-0.030587	0.91594	0.99972	D19A	3L	-	6185830	6189123	3233	protein_coding	NA	596	266	477	762	275	340	9.46515	5.25764	8.82311	13.9062	4.83058	5.86185
FBgn0022936	228.547	188.281	270.028	422.593	145.3	190.925	-0.10879	0.74998	0.99972	CycH	3L	+	21821997	21823309	1065	protein_coding	NA	295	150	275	548	126	166	14.222	9.00029	15.4416	30.3593	6.71882	8.68801
FBgn0022942	817.345	817.139	857.215	1277.03	673.454	832.711	-0.13723	0.61863	0.99972	Cbp80	X	+	4650015	4658259	3271	protein_coding	NA	1055	651	873	1656	584	724	17.3225	13.3036	16.6953	31.2459	10.6061	12.9054
FBgn0022943	302.147	279.911	328.943	340.079	231.788	293.289	0.064553	0.79694	0.99972	Cbp20	3R	+	18164661	18165439	600	protein_coding	NA	390	223	335	441	201	255	33.3734	23.7503	33.3889	43.3659	19.0246	23.6892
FBgn0022959	2556.63	2224.22	2573.61	3022.15	2006.52	2208.29	0.020512	0.93267	0.99972	yps	3L	-	12121274	12125150	2677	protein_coding	NA	3300	1772	2621	3919	1740	1920	76.5285	51.1447	70.7943	104.438	44.6317	48.3376
FBgn0022960	504.352	458.15	571.477	829.762	355.178	374.95	-0.020266	0.94947	0.99972	vimar	2R	-	6975285	6985712	3470	protein_coding	NA	651	365	582	1076	308	326	9.63526	6.72362	10.0329	18.3007	5.04218	5.23811
FBgn0022981	275.031	102.927	255.299	507.42	68.0373	175.973	-0.14153	0.71451	0.99972	rpk	3R	+	4645981	4648884	2536	protein_coding	NA	355	82	260	658	59	153	7.2129	2.07359	6.15286	15.3632	1.32592	3.3748
FBgn0022984	456.319	370.286	394.731	498.937	427.828	463.512	-0.16931	0.45175	0.99972	qkr58E-3	2R	-	22409208	22411545	1729	protein_coding	NA	589	295	402	647	371	403	19.1159	11.916	15.196	24.1301	13.318	14.1991
FBgn0022985	746.844	566.098	745.277	913.818	515.469	695.843	-0.039817	0.88485	0.99972	qkr58E-2	2R	+	22415560	22419001	3206	protein_coding	NA	964	451	759	1185	447	605	17.4463	10.1586	15.9989	24.6445	8.94788	11.8866
FBgn0022986	279.679	223.427	216.022	291.496	213.337	221.98	-0.014062	0.95675	0.99972	qkr58E-1	2R	-	22412556	22415518	2713	protein_coding	NA	361	178	220	378	185	193	9.90121	6.07616	7.0279	11.9137	5.61226	5.74663
FBgn0022987	439.275	430.535	416.334	620.779	365.556	408.304	-0.10262	0.70136	0.99972	qkr54B	2R	+	17469624	17475129	4432	protein_coding	NA	567	343	424	805	317	355	9.548	7.18872	8.31606	15.5775	5.90437	6.48982
FBgn0023000	371.873	538.483	359.382	419.508	687.292	565.876	-0.33776	0.22784	0.99972	mth	3L	-	343378	346957	2420	protein_coding	NA	480	429	366	544	596	492	11.7918	13.1167	10.4723	15.3572	16.1947	13.1214
FBgn0023001	129.381	77.8227	97.21	98.7078	209.878	165.622	-0.49221	0.12868	0.99972	melt	3L	+	7134516	7143074	4372	protein_coding	NA	167	62	99	128	182	144	2.05473	0.94942	1.41872	1.80977	2.47682	1.92343
FBgn0023023	828.966	1232.61	793.391	402.543	1017.1	1088.05	0.14329	0.66595	0.99972	CRMP	3R	+	5571108	5579189	2814	protein_coding	NA	1070	982	808	522	882	946	20.6533	23.5909	18.1651	11.5784	18.8304	19.8231
FBgn0023076	390.466	440.577	425.171	196.644	409.377	313.992	0.37645	0.19551	0.99972	Clk	3L	-	7763233	7775603	4516	protein_coding	NA	504	351	433	255	355	273	6.95437	6.02785	6.95885	4.04335	5.41802	4.08945
FBgn0023081	794.103	763.165	731.53	951.604	656.157	768.303	-0.049313	0.83387	0.99972	gek	2R	-	24092079	24098636	5108	protein_coding	NA	1025	608	745	1234	569	668	10.3029	7.6062	8.72197	14.2536	6.32606	7.28932
FBgn0023083	1712.16	2063.56	1596.6	1554.65	1828.94	1517.05	0.1205	0.58982	0.99972	fray	3R	+	18573091	18589459	3934	protein_coding	NA	2210	1644	1626	2016	1586	1319	32.9566	30.5126	28.2418	34.5473	26.16	21.3535
FBgn0023090	2.3242	3.76562	0.981919	3.85577	1.15318	3.45046	-0.07197	0.8296	0.99972	dtr	2L	+	21361216	21367288	4704	protein_coding	NA	3	3	1	5	1	3	0.0327447	0.0407539	0.0127128	0.0627138	0.0120727	0.035548
FBgn0023094	797.202	676.556	769.825	988.62	546.605	717.696	-0.0057936	0.98289	0.99972	cyc	3L	-	19813770	19815938	1625	protein_coding	NA	1029	539	784	1282	474	624	32.5124	21.1958	28.8517	46.5474	16.5652	21.4039
FBgn0023095	707.333	711.701	610.754	474.26	1277.72	948.877	-0.3262	0.30282	0.99972	caps	3L	+	13228692	13279642	4841	protein_coding	NA	913	567	622	615	1108	825	9.79047	7.56735	7.76864	7.57847	13.1419	9.60421
FBgn0023096	13.9452	18.8281	15.7107	23.9058	13.8381	10.3514	-0.0088617	0.98155	0.99972	btv	2L	-	17962625	17982472	12821	protein_coding	NA	18	15	16	31	12	9	0.0720838	0.0747626	0.0746289	0.142659	0.0531534	0.0391275
FBgn0023097	1287.61	593.712	1113.5	1872.36	473.955	852.264	-0.065268	0.8573	0.99972	bon	3R	+	20593139	20612540	5811	protein_coding	NA	1662	473	1134	2428	411	741	15.1354	5.36106	12.0281	25.4088	4.13989	7.3258
FBgn0023129	8906.35	13592.6	10732.4	5117.38	11118.9	11488.9	0.21	0.49906	0.99972	aay	3L	+	9423253	9424781	1529	protein_coding	NA	11496	10829	10930	6636	9642	9989	386.035	452.58	427.486	256.071	358.122	364.147
FBgn0023130	246.366	136.817	178.709	372.468	122.237	185.175	-0.19998	0.56698	0.99972	a6	X	-	1693615	1695889	2218	protein_coding	NA	318	109	182	483	106	161	7.56593	3.22768	5.04346	13.2055	2.7895	4.15849
FBgn0023143	5354.19	4276.48	5182.57	7079.2	4044.18	4351.03	-0.054161	0.84255	0.99972	Uba1	2R	-	9688289	9693328	4343	protein_coding	NA	6911	3407	5278	9180	3507	3783	81.703	50.1299	72.6756	124.714	45.8583	48.5521
FBgn0023167	712.756	460.66	637.266	983.222	482.027	531.371	-0.11423	0.71111	0.99972	SmD3	2R	+	12168731	12170003	744	protein_coding	NA	920	367	649	1275	418	462	63.4895	31.5216	52.1652	101.111	31.9062	34.6123
FBgn0023169	1669.55	1862.72	1848.95	1807.59	1973.08	1878.2	-0.06769	0.73152	0.99972	AMPKalpha	X	+	1375536	1378896	2853	protein_coding	NA	2155	1484	1883	2344	1711	1633	39.9876	34.272	40.6959	49.9815	35.1166	32.8957
FBgn0023170	12886.2	20905.4	21045.5	11302.8	15547.1	18764.8	0.22448	0.42749	0.99972	RpL39	2R	-	24061853	24062431	288	protein_coding	NA	16633	16655	21433	14657	13482	16315	2965.28	3695.45	4450.4	3002.71	2658.48	3157.59
FBgn0023171	270.382	261.083	304.395	374.781	292.906	297.89	-0.18776	0.43203	0.99972	rnh1	2R	-	7931054	7932380	1108	protein_coding	NA	349	208	310	486	254	259	16.5916	12.3071	17.1651	26.5505	13.3562	13.3671
FBgn0023172	2093.33	1881.55	1831.28	2014.26	2229.09	1986.32	-0.094047	0.64095	0.99972	RhoGEF2	2R	+	17027190	17044653	8486	protein_coding	NA	2702	1499	1865	2612	1933	1727	16.906	11.6731	13.5912	18.7803	13.3774	11.7307
FBgn0023174	1836.9	2049.75	1942.24	2097.54	2276.37	1989.77	-0.11792	0.55468	0.99972	Prosbeta2	3L	+	14999951	15001319	1034	protein_coding	NA	2371	1633	1978	2720	1974	1730	117.733	100.921	114.397	155.206	108.417	93.2582
FBgn0023175	1712.16	1974.44	1916.71	2013.48	2058.42	1877.05	-0.080534	0.68753	0.99972	Prosalpha7	2R	-	9846636	9847836	976	protein_coding	NA	2210	1573	1952	2611	1785	1632	116.26	102.99	119.602	157.84	103.863	93.2035
FBgn0023177	871.577	573.629	849.36	1442.83	516.622	835.011	-0.21918	0.5054	0.99972	Pp4-19C	X	-	20421087	20424002	2213	protein_coding	NA	1125	457	865	1871	448	726	29.0405	14.6824	26.007	55.5009	12.7913	20.3453
FBgn0023178	0	1.25521	0	0	2.30635	0	-0.035144	0.81307	NA	Pdf	3R	-	26455462	26456141	680	protein_coding	NA	0	1	0	0	2	0	0	0.0939736	0	0	0.167029	0
FBgn0023179	6.97261	12.5521	13.7469	10.025	33.4421	16.1021	-0.44194	0.25732	0.99972	amon	3R	-	26697697	26714159	3991	protein_coding	NA	9	10	14	13	29	14	0.115784	0.160115	0.209776	0.192186	0.412656	0.195528
FBgn0023180	161.145	57.7394	100.156	253.71	41.5143	90.8621	-0.16025	0.67794	0.99972	Orc6	2R	-	9845458	9846485	972	protein_coding	NA	208	46	102	329	36	79	10.9871	3.02417	6.27542	19.9706	2.10333	4.53025
FBgn0023181	285.877	174.474	253.335	439.558	133.768	220.829	-0.1128	0.74654	0.99972	Orc4	2R	-	24795740	24797414	1615	protein_coding	NA	369	139	258	570	116	192	11.7312	5.49993	9.55336	20.8239	4.07903	6.62659
FBgn0023197	8.52208	6.27603	284.757	948.52	9.2254	11.5015	-0.18779	NA	NA	Jon74E	3L	-	17546739	17549127	1553	protein_coding	NA	11	5	290	1230	8	10	0.47944	0.271231	14.7218	61.6056	0.385671	0.473169
FBgn0023212	1589.76	2148.91	1830.3	1826.09	2679.98	3164.07	-0.39881	0.13715	0.99972	EloB	3R	-	20578222	20579850	1207	protein_coding	NA	2052	1712	1864	2368	2324	2751	87.2885	90.6382	92.3523	115.754	109.345	127.041
FBgn0023213	6581.37	6033.77	5742.26	5971.82	5933.09	6047.51	0.030146	0.87557	0.99972	eIF4G	4	-	915297	930715	6565	protein_coding	NA	8495	4807	5848	7744	5145	5258	73.8511	52.011	59.2138	77.3629	49.4725	49.6237
FBgn0023214	341.658	622.582	405.533	213.61	565.056	416.356	0.14994	0.65328	0.99972	edl	2R	-	18667527	18673536	1454	protein_coding	NA	441	496	413	277	490	362	15.5726	21.7988	16.9861	11.2403	19.1383	13.8773
FBgn0023215	1702.09	1157.3	1521.97	2111.42	952.523	1146.7	0.045954	0.88179	0.99972	Mnt	X	+	3671801	3701672	4556	protein_coding	NA	2197	922	1550	2738	826	997	34.7618	18.1565	28.5645	49.7828	14.4556	17.1255
FBgn0023216	396.664	283.676	373.129	694.039	198.346	287.538	-0.11865	0.73561	0.99972	Parg	X	-	3668837	3671502	2599	protein_coding	NA	512	226	380	900	172	250	10.2687	5.64135	8.87672	20.7426	3.81558	5.44329
FBgn0023388	909.539	951.446	906.311	936.181	1021.71	895.97	-0.041336	0.83747	0.99972	Dap160	2L	-	21134439	21142347	6395	protein_coding	NA	1174	758	923	1214	886	779	13.687	10.9986	12.5332	16.2642	11.4251	9.85943
FBgn0023395	671.695	278.656	653.958	1275.49	176.436	455.461	-0.14763	0.70095	0.99972	Chd3	3L	+	19447173	19450238	3066	protein_coding	NA	867	222	666	1654	153	396	14.5189	4.62696	12.9901	31.8291	2.83394	7.19921
FBgn0023407	1526.23	1521.31	1444.4	1670.32	1622.52	1358.33	-0.046626	0.82278	0.99972	B4	2L	-	13500624	13549328	8114	protein_coding	NA	1970	1212	1471	2166	1407	1181	15.3579	11.7597	13.3567	19.4043	12.1323	9.99516
FBgn0023415	3.09894	0	0	2.31346	0	0	0.020453	0.90391	NA	Acp32CD	2L	+	11015620	11016571	886	protein_coding	NA	4	0	0	3	0	0	0.232324	0	0	0.20023	0	0
FBgn0023416	8.52208	8.78644	5.89151	3.85577	14.9913	18.4025	-0.29881	0.4426	0.99972	Ac3	2L	+	21632587	21647964	5172	protein_coding	NA	11	7	6	5	13	16	0.157277	0.124565	0.0999183	0.0821515	0.205589	0.248351
FBgn0023423	1754	1473.61	1732.11	2309.61	1337.68	1584.91	-0.0673	0.79891	0.99972	slmb	3R	-	21119252	21127485	3492	protein_coding	NA	2264	1174	1764	2995	1160	1378	36.5771	23.6064	33.1935	55.6037	20.7289	24.1689
FBgn0023441	3070.27	3041.36	2978.16	2207.04	3375.34	3338.9	0.024317	0.92053	0.99972	fus	2R	-	15657318	15676669	7287	protein_coding	NA	3963	2423	3033	2862	2927	2903	48.8653	37.1841	43.5583	40.5527	39.9194	38.8596
FBgn0023458	1660.26	1565.24	1463.06	1762.09	1732.07	1589.51	-0.10853	0.58724	0.99972	Rbcn-3A	X	-	6240745	6255487	11139	protein_coding	NA	2143	1247	1490	2285	1502	1382	9.87786	7.15377	7.99925	12.1032	7.65765	6.9155
FBgn0023477	8160.28	16721.8	10588	4376.3	9316.5	11473.9	0.3749	0.26327	0.99972	Tal	2R	+	23940410	23942114	1116	protein_coding	NA	10533	13322	10783	5675	8079	9976	484.59	762.817	577.809	300.028	411.117	498.258
FBgn0023479	7840.32	11615.7	8457.27	4486.58	9144.68	12779.4	0.062007	0.84903	0.99972	Tequila	3L	+	9074643	9092131	9106	protein_coding	NA	10120	9254	8613	5818	7930	11111	90.8229	103.365	90.0309	60.0015	78.7178	108.254
FBgn0023489	2.3242	5.02082	0	0	0	3.45046	0.10314	0.65645	0.99972	Pph13	2L	+	577486	579549	1880	protein_coding	NA	3	4	0	0	0	3	0.0819314	0.135962	0	0	0	0.0889457
FBgn0023495	5.42314	0	0.981919	4.62693	9.2254	6.90092	-0.41642	0.22981	0.99972	Lip3	3R	-	13370240	13371904	1434	protein_coding	NA	7	0	1	6	8	6	0.250632	0	0.0417023	0.246867	0.31682	0.233219
FBgn0023496	8.52208	7.53123	5.89151	2.31346	4.6127	9.20123	0.18948	0.62079	0.99972	Lip1	2L	-	10699408	10701544	1681	protein_coding	NA	11	6	6	3	4	8	0.34713	0.235656	0.220533	0.108791	0.139619	0.274072
FBgn0023506	259.536	198.322	323.051	361.671	161.445	207.028	0.074595	0.81612	0.99972	Es2	X	+	8461479	8463349	1729	protein_coding	NA	335	158	329	469	140	180	9.94802	5.83952	11.3792	16.0044	4.59838	5.80282
FBgn0023507	8873.81	16765.8	12303.4	3969.13	7728.58	11130	0.55778	0.094269	0.99972	CG3835	X	+	2141489	2144937	2209	protein_coding	NA	11454	13357	12530	5147	6702	9677	303.452	440.423	386.64	156.697	196.391	278.323
FBgn0023508	806.499	809.607	828.74	1033.35	818.754	897.12	-0.15619	0.46387	0.99972	Ocrl	X	+	1922981	1927524	3688	protein_coding	NA	1041	645	844	1340	710	780	14.6275	11.2799	13.8128	21.637	11.0347	11.8984
FBgn0023509	639.931	439.322	670.651	850.583	349.412	455.461	0.062016	0.84731	0.99972	mip130	X	+	1908239	1920318	3459	protein_coding	NA	826	350	683	1103	303	396	12.2607	6.46595	11.8081	18.8142	4.97467	6.38126
FBgn0023510	659.299	515.889	579.332	808.17	649.238	630.284	-0.22565	0.3361	0.99972	Rbcn-3B	X	+	1908920	1916825	6716	protein_coding	NA	851	411	590	1048	563	548	6.83672	4.10949	5.52068	9.67505	5.00278	4.7794
FBgn0023511	575.628	657.728	666.723	613.839	616.949	707.344	-0.02644	0.90217	0.99972	Edem1	X	-	1903704	1908827	4752	protein_coding	NA	743	524	679	796	535	615	10.0602	8.83035	10.7081	12.3853	8.0123	9.04
FBgn0023512	460.193	445.598	446.773	558.316	279.068	401.404	0.10551	0.70961	0.99972	eIF2B-epsilon	X	-	1920166	1922874	2447	protein_coding	NA	594	355	455	724	242	349	12.8576	9.56376	11.4711	18.0088	5.79392	8.20111
FBgn0023513	357.928	173.218	342.69	684.014	178.742	299.04	-0.27996	0.44249	0.99972	CG14803	X	+	1868870	1872408	3419	protein_coding	NA	462	138	349	887	155	260	6.95216	2.58455	6.11682	15.3382	2.57985	4.24743
FBgn0023514	517.523	562.332	623.519	646.227	402.458	503.767	0.11596	0.65132	0.99972	CG14805	X	+	1877317	1879077	1704	protein_coding	NA	668	448	635	838	349	438	20.1277	16.8005	22.285	29.0158	11.6313	14.3274
FBgn0023515	2242.86	1009.19	2295.73	3030.64	793.384	1887.4	-0.028993	0.93608	0.99972	CG14814	X	-	1862009	1865835	3577	protein_coding	NA	2895	804	2338	3930	688	1641	43.0965	14.8963	40.5378	67.2295	11.3284	26.5202
FBgn0023516	576.403	573.629	587.188	626.948	761.096	828.111	-0.31926	0.15098	0.99972	Pex5	X	-	1866832	1869061	2230	protein_coding	NA	744	457	598	813	660	720	18.4986	14.142	17.3177	23.229	18.1508	19.4345
FBgn0023517	354.054	258.572	340.726	491.225	279.068	315.142	-0.15799	0.58136	0.99972	Pgam5	X	-	1872400	1873565	1100	protein_coding	NA	457	206	347	637	242	274	21.3504	11.978	18.8817	34.1981	12.5052	13.8968
FBgn0023518	574.853	468.192	624.501	809.712	385.16	546.323	-0.052322	0.85947	0.99972	trr	X	-	1881313	1889950	8314	protein_coding	NA	742	373	636	1050	334	475	4.59942	2.87764	4.59175	7.47932	2.28997	3.19645
FBgn0023519	323.839	323.843	326.979	493.539	277.915	369.199	-0.19722	0.46525	0.99972	mRpL16	X	+	1890256	1891482	1076	protein_coding	NA	418	258	333	640	241	321	22.0572	16.9442	20.4663	38.8086	14.0662	18.3888
FBgn0023520	127.831	76.5675	103.102	97.1654	66.8842	77.0603	0.28586	0.34919	0.99972	CG3857	X	-	1937700	1940040	2341	protein_coding	NA	165	61	105	126	58	67	3.61884	1.66511	2.68224	3.17563	1.40701	1.59527
FBgn0023521	188.261	154.39	232.715	198.958	163.751	128.817	0.19069	0.501	0.99972	CG3587	X	+	1940307	1941536	1105	protein_coding	NA	243	123	237	258	142	112	11.291	7.11308	12.8261	13.7758	7.2979	5.6496
FBgn0023522	570.98	371.541	686.361	894.539	449.738	473.863	-0.12568	0.69309	0.99972	CG11596	X	+	1927683	1930517	1892	protein_coding	NA	737	296	699	1160	390	412	22.2721	11.133	24.6033	40.2833	13.036	13.5165
FBgn0023523	1.54947	0	6.87343	5.39808	17.2976	10.3514	-0.5719	0.11441	0.99972	Or2a	X	+	2246231	2247567	1267	protein_coding	NA	2	0	7	7	15	9	0.0810476	0	0.330393	0.325973	0.672336	0.395938
FBgn0023524	3.87367	1.25521	0	2.31346	2.30635	2.30031	-0.069635	0.81608	0.99972	CG3078	X	-	2254403	2259863	3982	protein_coding	NA	5	1	0	3	2	2	0.0644859	0.0160518	0	0.0444621	0.0285305	0.0280027
FBgn0023525	105.364	95.3956	120.776	67.8616	247.933	195.526	-0.47172	0.18356	0.99972	CG3191	X	-	2250145	2251993	1247	protein_coding	NA	136	76	123	88	215	170	5.91758	4.11573	6.2335	4.40009	10.3473	8.03024
FBgn0023526	1596.73	1380.73	1359.96	2022.74	1328.46	1282.42	-0.083912	0.74409	0.99972	CG2865	X	-	2278031	2293411	5574	protein_coding	NA	2061	1100	1385	2623	1152	1115	27.8692	18.5126	21.8131	40.7585	17.2299	16.368
FBgn0023527	416.807	247.275	519.435	670.904	302.132	393.352	-0.15936	0.62954	0.99972	CG3071	X	+	2262837	2264825	1921	protein_coding	NA	538	197	529	870	262	342	14.3794	6.5532	16.4679	26.721	7.74543	9.9234
FBgn0023528	2011.21	1227.59	2057.12	3079.22	878.719	1314.63	0.0043758	0.99008	0.99972	CG2924	X	-	2264657	2270761	3064	protein_coding	NA	2596	978	2095	3993	762	1143	48.8772	22.9176	45.9418	86.3923	15.8687	23.3627
FBgn0023529	2743.34	3620.01	2899.61	2268.74	2795.3	2701.71	0.23056	0.31065	0.99972	CG2918	X	-	2271008	2275068	3581	protein_coding	NA	3541	2884	2953	2942	2424	2349	55.4124	56.1699	53.8228	52.905	41.9564	39.906
FBgn0023530	144.875	192.046	223.878	183.535	207.572	154.121	0.033032	0.90427	0.99972	CG3740	X	-	1668406	1669297	829	protein_coding	NA	187	153	228	238	180	134	11.5817	11.7937	16.4471	16.9388	12.3308	9.00973
FBgn0023531	176.64	148.114	187.547	195.873	102.633	115.015	0.24832	0.4136	0.99972	CG32809	X	-	1673110	1692768	7613	protein_coding	NA	228	118	191	254	89	100	2.05411	1.32312	2.00421	2.62964	0.886877	0.978054
FBgn0023534	12.3958	32.6353	9.81919	7.71154	41.5143	19.5526	-0.15864	0.68467	0.99972	CG17778	X	+	494614	496369	1344	protein_coding	NA	16	26	10	10	36	17	0.666801	1.34858	0.485398	0.478906	1.65945	0.76913
FBgn0023535	607.392	977.805	785.535	428.762	1050.54	1356.03	-0.1931	0.569	0.99972	arg	X	+	509435	528028	1243	protein_coding	NA	784	779	800	556	911	1179	32.3841	40.048	38.4882	26.3915	41.6216	52.8694
FBgn0023536	145.65	155.645	166.926	184.306	100.326	178.274	0.011145	0.96978	0.99972	CG3156	X	+	487878	490725	2345	protein_coding	NA	188	124	170	239	87	155	4.11625	3.37904	4.33526	6.01334	2.10692	3.68426
FBgn0023537	3071.05	4056.82	3076.35	2263.34	2591.18	3387.2	0.27184	0.28083	0.99972	CG17896	X	-	490787	493495	2231	protein_coding	NA	3964	3232	3133	2935	2247	2945	99.9147	101.39	91.9768	85.0115	62.6446	80.5853
FBgn0023540	289.751	81.5883	213.076	382.493	192.58	218.529	-0.30709	0.39211	0.99972	CG3630	X	+	2162196	2172281	2031	protein_coding	NA	374	65	217	496	167	190	10.6859	2.31143	7.22139	16.2852	5.27765	5.89342
FBgn0023542	555.485	534.717	517.471	414.881	558.137	585.428	0.041666	0.86053	0.99972	Nmd3	X	-	2182818	2184668	1791	protein_coding	NA	717	426	527	538	484	509	20.5547	15.1995	17.5964	17.7234	15.3469	15.841
FBgn0023545	454.769	573.629	509.616	441.871	460.117	489.965	0.13051	0.55645	0.99972	CG4406	X	-	2007911	2009364	1203	protein_coding	NA	587	457	519	573	399	426	25.053	24.2753	25.7995	28.1028	18.8356	19.7381
FBgn0023549	1978.67	3096.59	2217.17	1326.39	3352.28	3222.73	-0.089978	0.7817	0.99972	Mct1	X	+	2189188	2205373	3197	protein_coding	NA	2554	2467	2258	1720	2907	2802	46.0596	55.3728	47.4292	35.6452	57.9868	54.8583
FBgn0023550	475.687	1167.34	728.584	497.395	2211.79	1661.97	-0.58572	0.11249	0.99972	CG18031	X	-	2201820	2203866	1681	protein_coding	NA	614	930	742	645	1918	1445	18.7537	35.3533	26.3964	22.6388	64.7967	47.9139
FBgn0024150	134.029	207.109	116.848	115.673	187.968	117.316	0.096071	0.759	0.99972	Ac78C	3L	-	21136447	21171930	6850	protein_coding	NA	173	165	119	150	163	102	1.48735	1.76555	1.19162	1.48195	1.55003	0.952011
FBgn0024177	773.96	312.546	635.302	1262.38	326.349	673.99	-0.26802	0.46232	0.99972	zpg	3L	-	6604366	6606032	1539	protein_coding	NA	999	249	647	1637	283	586	34.2634	10.629	25.8459	64.519	10.7359	21.8191
FBgn0024179	302.147	292.463	291.63	112.589	274.456	207.028	0.46598	0.1343	0.99972	wit	3L	-	4064152	4071717	4217	protein_coding	NA	390	233	297	146	238	180	4.74841	3.53075	4.21174	2.04273	3.20513	2.3792
FBgn0024183	1081.53	1474.87	1208.74	759.587	1464.53	1181.21	0.12262	0.66516	0.99972	vig	2L	-	15062931	15070316	3372	protein_coding	NA	1396	1175	1231	985	1270	1027	28.308	29.6544	29.0739	22.9527	28.4847	22.6083
FBgn0024184	111.562	131.797	117.83	44.727	87.6413	77.0603	0.63739	0.039914	0.80041	unc-4	X	+	17768569	17778708	2999	protein_coding	NA	144	105	120	58	76	67	2.54072	2.30574	2.46602	1.17597	1.48318	1.28335
FBgn0024187	611.266	808.352	665.741	491.996	856.809	668.239	0.04163	0.878	0.99972	syd	3L	-	7916650	7936120	5612	protein_coding	NA	789	644	678	638	743	581	8.22708	8.35762	8.23419	7.64475	8.56925	6.57688
FBgn0024188	591.123	402.921	545.947	914.589	432.441	473.863	-0.19451	0.53199	0.99972	san	2R	+	11360706	11361871	808	protein_coding	NA	763	321	556	1186	375	412	48.4842	25.3868	41.1502	86.6032	26.3567	28.4215
FBgn0024189	383.494	542.249	242.534	333.91	896.017	744.149	-0.55836	0.1042	0.99972	sns	2R	+	8798489	8856091	8694	protein_coding	NA	495	432	247	433	777	647	2.96179	3.21707	1.72135	2.97722	5.14227	4.2027
FBgn0024191	199.882	170.708	207.185	316.173	89.9477	166.772	0.0065555	0.98496	0.99972	sip1	2L	+	5721051	5723944	2780	protein_coding	NA	258	136	211	410	78	145	4.89891	3.21401	4.66643	8.94618	1.63817	2.98898
FBgn0024194	283.553	209.619	210.131	319.258	114.164	177.124	0.15333	0.6456	0.99972	rasp	3L	+	3162180	3163852	1673	protein_coding	NA	366	167	214	414	99	154	11.2324	6.37875	7.64939	14.6004	3.36056	5.13082
FBgn0024196	206.079	367.775	266.1	293.81	380.548	301.34	-0.18494	0.51129	0.99972	robl	2R	+	17456472	17457129	527	protein_coding	NA	266	293	271	381	330	262	25.9154	35.5281	30.7516	42.6555	35.5611	27.711
FBgn0024222	361.801	453.129	372.147	377.866	371.322	385.301	0.057982	0.79665	0.99972	ird5	3R	-	16046347	16049421	2488	protein_coding	NA	467	361	379	490	322	335	9.63726	9.27196	9.10957	11.62	7.34983	7.50509
FBgn0024227	196.783	112.968	198.348	471.175	102.633	106.964	-0.26007	0.4945	0.99972	aurB	2L	-	10856797	10858094	1183	protein_coding	NA	254	90	202	611	89	93	11.0239	4.86153	10.2112	30.4731	4.27245	4.38187
FBgn0024230	412.159	311.291	338.762	447.27	387.467	457.761	-0.25295	0.28467	0.99972	Hs2st	2L	-	19442833	19444750	1652	protein_coding	NA	532	248	345	580	336	398	16.5344	9.59305	12.4887	20.7147	11.5505	13.4287
FBgn0024232	8.52208	0	2.94576	3.08462	4.6127	0	0.10188	0.72862	0.99972	gprs	2R	+	16641243	16651125	7033	protein_coding	NA	11	0	3	4	4	0	0.111046	0	0.0352739	0.0464028	0.0446638	0
FBgn0024234	335.46	484.509	398.659	263.735	642.318	472.713	-0.14132	0.65362	0.99972	gbb	2R	+	23851562	23853247	1686	protein_coding	NA	433	386	406	342	557	411	13.5066	14.9855	14.7504	12.2591	19.2175	13.9179
FBgn0024236	1157.45	1078.22	1103.68	1420.47	789.925	884.468	0.093575	0.7305	0.99972	foi	3L	+	8525244	8534503	4210	protein_coding	NA	1494	859	1124	1842	685	769	21.4566	15.3544	18.8018	30.4	10.8814	11.9898
FBgn0024238	1621.52	2196.61	1584.82	1767.49	2573.89	1789.64	-0.15945	0.53935	0.99972	Fim	X	-	17285704	17301929	4258	protein_coding	NA	2093	1750	1614	2292	2232	1556	32.594	33.9183	29.2748	41.0163	38.4456	26.3058
FBgn0024244	167.343	154.39	141.396	112.589	403.611	200.127	-0.45193	0.19698	0.99972	drm	2L	+	3539247	3548423	2817	protein_coding	NA	216	123	144	146	350	174	4.96429	3.51833	3.85468	3.85594	8.89727	4.34138
FBgn0024245	165.793	104.182	155.143	276.844	138.381	135.718	-0.29112	0.37204	0.99972	dnt	2L	-	19338669	19363227	2639	protein_coding	NA	214	83	158	359	120	118	4.16985	2.01285	3.5858	8.03849	2.58626	2.49611
FBgn0024248	412.159	407.942	423.207	370.154	400.152	358.848	0.12811	0.54577	0.99972	chico	2L	-	10242512	10247078	3578	protein_coding	NA	532	325	431	480	347	312	8.2672	6.28577	7.80093	8.5716	5.96433	5.26352
FBgn0024250	92.9682	53.9738	40.2587	67.8616	94.5604	94.3126	-0.33476	0.32159	0.99972	brk	X	+	7307939	7311132	3194	protein_coding	NA	120	43	41	88	82	82	1.929	0.860297	0.767641	1.62558	1.45798	1.431
FBgn0024251	17.8189	23.8489	13.7469	11.5673	17.2976	12.6517	0.25736	0.49766	0.99972	bbx	X	+	21363028	21373145	5935	protein_coding	NA	23	19	14	15	15	11	0.299646	0.308079	0.212437	0.224567	0.216151	0.155578
FBgn0024273	719.729	743.082	656.904	761.9	839.511	646.386	-0.077383	0.72742	0.99972	WASp	3R	-	28824506	28832024	3125	protein_coding	NA	929	592	669	988	728	562	17.8112	14.1262	14.9391	21.7674	15.4381	11.6973
FBgn0024277	1090.05	1388.26	1184.19	1505.29	1801.26	1091.5	-0.23132	0.37138	0.99972	trio	3L	-	995982	1034875	11182	protein_coding	NA	1407	1106	1206	1952	1562	949	12.6472	12.3732	12.6261	20.1629	15.5298	9.26061
FBgn0024285	875.45	787.014	859.179	1105.06	753.023	744.149	-0.04091	0.86901	0.99972	Srp54	2L	+	9912911	9915044	2134	protein_coding	NA	1130	627	875	1433	653	647	27.1876	18.7753	24.5201	39.6198	17.3776	16.8994
FBgn0024288	10.8463	7.53123	10.8011	10.025	13.8381	6.90092	-0.034166	0.93025	0.99972	Sox100B	3R	+	31065253	31083407	2049	protein_coding	NA	14	6	11	13	12	6	0.350811	0.187122	0.32104	0.374336	0.332592	0.163219
FBgn0024289	16460.8	28804.5	17876.8	7905.1	18867.1	26652.5	0.17705	0.60812	0.99972	Sodh-1	3R	+	7052335	7054541	1387	protein_coding	NA	21247	22948	18206	10251	16361	23173	845.003	1135.88	843.33	468.49	719.707	1000.5
FBgn0024291	1172.17	961.487	1080.11	1546.16	732.266	838.462	0.035785	0.90453	0.99972	Sir2	2L	+	13165564	13169551	3809	protein_coding	NA	1513	766	1100	2005	635	729	20.3946	12.8509	17.2699	31.0573	9.46748	10.6679
FBgn0024293	7859.69	13690.5	9914.44	4599.16	10704.9	14897.9	0.044035	0.89717	0.99972	Spn43Ab	2R	-	7151662	7153642	1329	protein_coding	NA	10145	10907	10097	5964	9283	12953	391.935	524.439	454.335	264.773	396.675	543.259
FBgn0024294	6.19788	3.76562	11.783	3.85577	8.07223	6.90092	0.097353	0.80033	0.99972	Spn43Aa	2R	+	7147692	7149289	1294	protein_coding	NA	8	3	12	5	7	6	0.317426	0.14815	0.554569	0.22798	0.30721	0.258451
FBgn0024314	794.878	893.706	882.745	946.206	778.393	843.063	0.00099656	0.99627	0.99972	Plap	2L	-	1167172	1170365	2867	protein_coding	NA	1026	712	899	1227	675	733	19.5904	16.9201	19.993	26.9224	14.2556	15.1941
FBgn0024315	1369.73	1187.42	1239.18	1115.09	2137.99	1626.32	-0.30961	0.25839	0.99972	Picot	2R	-	16655323	16667675	3282	protein_coding	NA	1768	946	1262	1446	1854	1414	35.239	23.4671	29.297	33.1194	40.8729	30.596
FBgn0024319	12.3958	1.25521	2.94576	6.94039	4.6127	0	0.12037	0.71352	0.99972	Nach	2R	-	16653205	16655046	1551	protein_coding	NA	16	1	3	9	4	0	0.529657	0.0412006	0.115669	0.342367	0.14646	0
FBgn0024320	1076.88	1483.65	1035.92	760.358	1654.81	1301.97	-0.038759	0.89774	0.99972	Npc1a	2L	-	10213812	10221216	5198	protein_coding	NA	1390	1182	1055	986	1435	1132	16.753	17.7306	14.8099	13.6561	19.13	14.8115
FBgn0024321	151.848	184.515	180.673	85.5981	197.193	167.922	0.16002	0.6127	0.99972	NK7.1	3R	-	14329413	14372951	4373	protein_coding	NA	196	147	184	111	171	146	3.37244	3.14799	3.68747	2.19475	3.25439	2.72719
FBgn0024326	1004.06	901.237	1021.2	1283.2	942.144	968.429	-0.11425	0.62189	0.99972	Mkk4	3R	-	8646172	8650796	4110	protein_coding	NA	1296	718	1040	1664	817	842	21.3891	14.7482	19.9914	31.5583	14.914	15.086
FBgn0024329	1762.52	1521.31	1576.96	1816.84	1339.99	1541.21	0.044496	0.84302	0.99972	Mekk1	3R	-	18733106	18743594	6046	protein_coding	NA	2275	1212	1606	2356	1162	1340	21.8371	14.4792	17.9549	25.9874	12.3369	13.9635
FBgn0024330	242.492	155.645	247.444	345.477	144.147	165.622	-0.017726	0.95766	0.99972	MED6	3R	-	9766031	9768984	2121	protein_coding	NA	313	124	252	448	125	144	9.1518	4.51245	8.58193	15.0527	4.04257	4.57088
FBgn0024332	637.607	315.057	608.79	1524.57	324.042	625.683	-0.438	0.23701	0.99972	Mcm3	X	+	5323855	5326738	2747	protein_coding	NA	823	251	620	1977	281	544	15.3881	5.84101	13.5021	42.4783	5.81136	11.0423
FBgn0024352	2743.34	1995.78	2689.48	3711.57	2086.09	2131.23	-0.079239	0.78151	0.99972	Hop	2L	+	295122	297449	2023	protein_coding	NA	3541	1590	2739	4813	1809	1853	89.8705	50.2246	80.9665	140.372	50.7826	51.0553
FBgn0024360	349.405	205.854	344.654	417.966	183.355	317.442	-0.023608	0.94158	0.99972	CG11418	X	-	1344872	1349357	2444	protein_coding	NA	451	164	351	542	159	276	11.7009	5.29557	10.6065	16.159	4.56271	7.77365
FBgn0024361	136.353	120.5	92.3004	111.817	146.453	75.9101	0.051616	0.86804	0.99972	Tsp2A	X	+	1346553	1348143	1037	protein_coding	NA	176	96	94	145	127	66	9.45239	6.41694	5.88002	8.94892	7.54428	3.84811
FBgn0024362	981.589	1094.54	1139.03	1401.96	985.965	1043.19	-0.084967	0.72055	0.99972	CG11412	X	+	1342106	1344770	2347	protein_coding	NA	1267	872	1160	1818	855	907	30.0057	25.7023	31.9969	49.4761	22.3964	23.319
FBgn0024364	783.257	497.061	933.805	1098.12	401.305	603.831	0.055476	0.86907	0.99972	CG11417	X	+	1354014	1356473	2460	protein_coding	NA	1011	396	951	1424	348	525	21.101	10.2867	23.1182	34.1535	8.03371	11.8956
FBgn0024365	1184.57	1409.6	1220.53	1396.56	1184.31	1430.79	-0.06713	0.75556	0.99972	CG12773	X	-	1349623	1353981	3887	protein_coding	NA	1529	1123	1243	1811	1027	1244	21.1602	19.3429	20.0358	28.8008	15.7206	18.69
FBgn0024366	288.201	415.473	266.1	262.192	861.422	632.584	-0.63197	0.06587	0.99047	CG11409	X	-	1329518	1341587	4720	protein_coding	NA	372	331	271	340	747	550	4.3144	4.77786	3.66074	4.53138	9.58259	6.92492
FBgn0024371	791.004	355.223	642.175	1065.74	360.944	616.482	-0.13988	0.68769	0.99972	E2f2	2L	-	21154293	21156749	2002	protein_coding	NA	1021	283	654	1382	313	536	30.0584	10.3694	22.4254	46.7544	10.1922	17.1309
FBgn0024432	952.149	891.196	1011.38	1227.68	927.153	964.979	-0.11682	0.60488	0.99972	Dlc90F	3R	+	18299229	18300044	816	protein_coding	NA	1229	710	1030	1592	804	839	77.3301	55.6011	75.4842	115.11	55.9549	57.3104
FBgn0024491	292.075	291.208	259.227	592.247	740.338	563.575	-1.0543	6.1715e-06	0.0012668	Bin1	3R	-	16186156	16189564	3336	protein_coding	NA	377	232	264	768	642	490	11.0735	8.48128	9.03174	25.9227	20.8577	15.6249
FBgn0024509	1224.08	1403.32	1235.25	1308.65	1190.08	1491.75	-0.043335	0.84046	0.99972	Sec13	3R	+	23356278	23358531	1809	protein_coding	NA	1580	1118	1258	1697	1032	1297	51.474	45.3315	47.7346	63.5311	37.1874	45.8718
FBgn0024510	365.675	199.578	302.431	500.479	159.138	221.98	-0.017346	0.96067	0.99972	dlt	3L	-	1789631	1795328	4000	protein_coding	NA	472	159	308	649	138	193	6.05855	2.54011	4.60468	9.57294	1.95925	2.68942
FBgn0024542	200.656	130.541	245.48	376.323	123.39	164.472	-0.14674	0.67819	0.99972	Neos	3L	+	7241628	7243139	1449	protein_coding	NA	259	104	250	488	107	143	9.81403	4.90466	11.0334	21.2491	4.48452	5.88245
FBgn0024555	1608.35	1361.9	1459.13	1809.13	1118.58	1266.32	0.068865	0.7871	0.99972	flfl	3R	+	13683921	13693905	5739	protein_coding	NA	2076	1085	1486	2346	970	1101	24.0554	15.6474	20.0552	31.2383	12.432	13.8499
FBgn0024556	1403.82	1698.29	1417.89	1580.87	1372.28	1383.63	0.054186	0.80006	0.99972	EfTuM	2R	+	13507557	13509332	1776	protein_coding	NA	1812	1353	1444	2050	1190	1203	53.2235	49.4619	49.4009	69.1947	38.6614	38.3606
FBgn0024558	682.541	562.332	720.729	952.376	476.261	550.924	-0.0092806	0.97481	0.99972	Dph5	3R	-	22582028	22583225	1128	protein_coding	NA	881	448	734	1235	413	479	40.1009	25.3795	38.9131	64.5979	20.7928	23.6694
FBgn0024689	513.649	537.228	497.833	612.297	457.81	488.815	-0.010027	0.96516	0.99972	fws	2L	-	17478442	17481029	2477	protein_coding	NA	663	428	507	794	397	425	13.9798	11.2321	12.4514	19.239	9.25899	9.72863
FBgn0024698	545.413	389.114	566.567	859.837	223.716	365.749	0.035041	0.92142	0.99972	Cpsf160	2R	-	14497347	14503488	4845	protein_coding	NA	704	310	577	1115	194	318	7.73175	4.23736	7.3808	14.0719	2.35663	3.79147
FBgn0024728	697.261	598.733	653.958	982.451	450.891	529.071	-0.0084536	0.97767	0.99972	Slip1	4	+	663621	669884	2818	protein_coding	NA	900	477	666	1274	391	460	17.3719	11.4591	14.9728	28.2585	8.3477	9.63913
FBgn0024732	841.362	530.952	812.047	1450.54	492.406	680.891	-0.19815	0.55937	0.99972	Drep-1	2R	+	12044612	12050172	2153	protein_coding	NA	1086	423	827	1881	427	592	25.8984	12.5548	22.9705	51.5472	11.263	15.3264
FBgn0024733	19999	32915.2	30175.4	17502.9	24026.4	29521	0.19123	0.49706	0.99972	RpL10	3L	-	23093190	23095471	1235	protein_coding	NA	25814	26223	30731	22697	20835	25667	1425.15	1801.83	1976.07	1439.95	1272.28	1538.35
FBgn0024734	2500.84	2453.93	2481.31	2527.84	2422.82	2196.79	0.053176	0.78554	0.99972	PRL-1	2L	-	16245835	16257606	3790	protein_coding	NA	3228	1955	2527	3278	2101	1910	59.4254	44.7933	54.1833	69.3459	42.7808	38.1721
FBgn0024740	108.463	174.474	97.21	73.2597	156.832	165.622	-0.042838	0.89915	0.99972	Lip2	2L	-	10701940	10709453	2292	protein_coding	NA	140	139	99	95	136	144	4.00899	4.95392	3.3019	3.12611	4.30755	4.47655
FBgn0024754	497.38	778.227	609.772	540.579	815.295	870.666	-0.20432	0.46308	0.99972	Flo1	2R	-	15566271	15569404	1830	protein_coding	NA	642	620	621	701	707	757	18.0716	21.7211	20.3599	22.6753	22.0124	23.133
FBgn0024804	442.374	456.895	415.352	507.42	605.417	583.128	-0.33624	0.11992	0.99972	Dbp80	3L	+	27279316	27422159	2367	protein_coding	NA	571	364	423	658	525	507	20.3875	16.1755	17.591	26.9978	20.7335	19.6522
FBgn0024806	1042.79	810.863	854.27	1277.03	751.87	814.309	-0.060785	0.82357	0.99972	DIP2	3L	-	250229	257954	5932	protein_coding	NA	1346	646	870	1656	652	708	11.6994	6.98844	8.80768	16.5407	6.26834	6.68079
FBgn0024807	1074.56	1156.04	1035.92	895.31	1539.49	924.723	-0.03457	0.89829	0.99972	DIP1	X	-	21624796	21630148	3823	protein_coding	NA	1387	921	1055	1161	1335	804	22.6219	18.6956	20.0413	21.76	24.0834	14.2358
FBgn0024811	849.884	832.201	845.432	1118.17	879.873	906.321	-0.18429	0.39511	0.99972	Crk	4	+	210224	213165	1357	protein_coding	NA	1097	663	861	1450	763	788	50.7423	38.1685	46.3862	77.0736	39.0367	39.5699
[truncated: 10,419 more rows]

## Sheet: Table S3
Table S3: List of genes expressed in the adult female fat body identified by both RNA sequencing and iTRAQ.
128up
14-3-3epsilon
14-3-3zeta
18w
26-29-p
ABCB7
ACC
AcCoAS
Acer
Acn
[truncated: 1,940 more rows]

## Sheet: Table S4
Table S4: List of genes downregulated by svp RNAi.
[truncated: 72 more rows]

[truncated: 3 more sheets: Table S5, Table S6, Table S7]
